# Supplementary material for: Biomarkers Correlating with the Development of Oral Squamous Cell Carcinoma from Leukoplakia
Source: Research Square preprint supplement (doi:10.21203/rs.3.rs-6688707/v1), 2025-07-10
Supplement: Supplementary file 1 [file c79052379209506f29fb682c.xlsx]

## Sheet: Sheet1
Accession	Description	SD-leuko-ca	Sign SD-leuko-ca	LD-leuko-ca	Sign LD-leuko-ca	LD-leuko-ca	Sign LD-leuko-ca	Leuko-ca	Sign Leuko-ca	OSCC	Sign OSCC	SD-leuko-ca	Sign SD-leuko-ca	LD-leuko-ca	Sign LD-leuko-ca	Leuko-ca	Sign Leuko-ca
		VS Leuko-nonca (Fold change difference)	VS Leuko-nonca	VS Leuko-nonca (Fold change difference)	VS Leuko-nonca	SD-leuko-ca (Fold change difference)	vs SD-leuko-ca	VS leuko-nonca (Fold change difference)	VS Leuko-nonca	VS leuko-nonca (Fold change difference)	VS Leuko-nonca (unpaired)	VS OSCC (paired fold change difference)	VS OSCC	VS OSCC (Paired fold change difference)	VS OSCC	VS OSCC (Fold change difference)	VS OSCC
Q9NZV5	Selenoprotein N	0.57057	0.00015943	-0.485055	#DIV/0!	-1.05563	#DIV/0!	0.347366	0.182454	0.825478	0.00361174	-0.31584	0.242334	-1.2496	#DIV/0!	-0.478112	0.102956
P01042	Kininogen-1	-0.585531	0.000400178	0.620018	0.0304748	1.20555	0.00213485	-0.103311	0.665418	-0.316105	0.0967168	0.0530338	0.783437	0.738919	0.0797802	0.212794	0.428875
P02649	Apolipoprotein E	-0.607784	0.000553254	0.179584	0.440498	0.787368	0.0348112	-0.292837	0.121177	-0.325044	0.186353	0.159793	0.0763012	0.275796	0.0800863	0.0322073	0.905861
P39060	Collagen alpha-1(XVIII) chain	-0.488658	0.000832993	-0.0679995	0.769623	0.420659	0.130926	-0.320395	0.040225	-0.5428	0.00370005	0.156767	0.366053	0.481201	0.00428167	0.222405	0.196871
P49959	Double-strand break repair protein MRE11	0.617798	0.000954593	-0.325101	#DIV/0!	-0.942899	#DIV/0!	0.429218	0.0987846	0.650695	0.0075811	-0.16726	0.396144	-0.841433	#DIV/0!	-0.221477	0.3807
Q9UJS0	Calcium-binding mitochondrial carrier protein Aralar2	0.366463	0.00109604	-0.310146	#DIV/0!	-0.676609	#DIV/0!	0.231141	0.185486	0.564691	0.00454378	-0.124277	0.755366	-0.94879	#DIV/0!	-0.333551	0.096757
Q99523	Sortilin	-0.444728	0.00120669	-0.0509781	0.799355	0.393749	0.0857608	-0.287228	0.047477	-0.515018	0.000866713	0.152517	0.323386	0.468042	0.0810374	0.22779	0.0878638
P00742	Coagulation factor X	-0.596941	0.00141893	0.670509	#DIV/0!	1.26745	#DIV/0!	-0.343451	0.271837	-0.215094	0.564757	-0.433687	0.781269	0.937442	#DIV/0!	-0.128357	0.76907
Q9NS86	LanC-like protein 2	0.297347	0.00194185	-0.0702468	0.805376	-0.367594	0.293468	0.15031	0.257436	0.319786	0.000106767	-0.0375327	0.399143	-0.402431	0.226679	-0.169476	0.200171
P98160	Basement membrane-specific heparan sulfate proteoglycan core protein	-0.486506	0.0019795	-0.139191	0.59039	0.347315	0.247756	-0.34758	0.0352573	-0.540924	0.0111794	0.131382	0.430873	0.363465	0.0111577	0.193344	0.31027
Q9H9B1	Histone-lysine N-methyltransferase EHMT1	-0.447232	0.00198776	-0.03197	0.869629	0.415262	0.0800141	-0.281127	0.0581201	-0.098816	0.418342	-0.281196	0.104548	-0.00747621	0.966381	-0.182311	0.135699
Q96HS1	Serine/threonine-protein phosphatase PGAM5, mitochondrial	0.556813	0.00251601	-0.0772746	0.590176	-0.634087	0.00338487	0.303178	0.0685146	0.583478	0.000498852	-0.0473616	0.791557	-0.80719	0.00472566	-0.2803	0.111283
Q96NY7	Chloride intracellular channel protein 6	-0.835472	0.00259106	0.290677	0.576327	1.12615	0.0774149	-0.385013	0.243322	-0.366538	0.248598	-0.119685	0.770139	0.492649	0.375934	-0.0184741	0.959012
P29692	Elongation factor 1-delta	0.352769	0.00259568	-0.198979	0.336605	-0.551748	0.0394154	0.13207	0.349325	0.230039	0.147869	0.294043	0.157157	-0.589285	0.0146077	-0.0979691	0.58121
Q15154	Pericentriolar material 1 protein	0.568778	0.00482801	-0.335202	#DIV/0!	-0.90398	#DIV/0!	0.387982	0.13384	0.511073	0.0144725	0.0126762	0.953932	-0.801246	#DIV/0!	-0.123091	0.591834
Q96HW7	Integrator complex subunit 4	0.416961	0.00489756	-0.280174	#DIV/0!	-0.697135	#DIV/0!	0.277534	0.155577	0.660578	0.000304317	-0.162865	0.176629	-1.0215	#DIV/0!	-0.383044	0.0628129
Q9UG63	ATP-binding cassette sub-family F member 2	0.452495	0.00557041	-0.0921535	0.410656	-0.544648	0.00730132	0.234635	0.121982	0.474669	0.00118966	-0.0380817	0.767002	-0.504405	0.0439607	-0.240034	0.085985
P35542	Serum amyloid A-4 protein	-0.60571	0.00576889	1.08957	#DIV/0!	1.69528	#DIV/0!	-0.266655	0.500756	-0.863799	9.00722e-05	0.267949	0.322171	1.94351	#DIV/0!	0.597144	0.164398
Q14966	Zinc finger protein 638	0.713662	0.00641874	-0.315795	#DIV/0!	-1.02946	#DIV/0!	0.507771	0.106307	0.966737	0.0008779	-0.182325	0.709197	-1.35328	#DIV/0!	-0.458966	0.109672
O95163	Elongator complex protein 1	-0.201332	0.00656701	-0.131777	0.233884	0.0695544	0.447469	-0.17351	0.0179625	-0.0557783	0.483763	-0.0557874	0.403054	-0.217956	0.198493	-0.117732	0.0962762
Q14527	Helicase-like transcription factor	0.437923	0.00695413	-0.193799	#DIV/0!	-0.631722	#DIV/0!	0.311579	0.107339	0.782933	0.0452859	-0.00651287	0.870053	-1.31523	#DIV/0!	-0.471354	0.16539
Q12873	Chromodomain-helicase-DNA-binding protein 3	0.273943	0.00741347	-0.130361	#DIV/0!	-0.404304	#DIV/0!	0.193082	0.113361	0.256847	0.0678474	0.0217104	0.62707	-0.391823	#DIV/0!	-0.0637648	0.645455
P02655	Apolipoprotein C-II	-0.791389	0.00785943	0.687227	0.034709	1.47862	0.00115888	-0.199943	0.550951	-0.629945	0.0234686	0.101837	0.83705	1.12241	0.0180294	0.430002	0.207377
Q9HCU0	Endosialin	-0.544974	0.00800673	-0.102581	0.553325	0.442392	0.0223399	-0.368017	0.050337	-0.633857	0.0396139	0.186451	0.462899	0.812193	0.00259046	0.26584	0.328888
Q86V48	Leucine zipper protein 1	0.288677	0.00851366	-0.416084	#DIV/0!	-0.704761	#DIV/0!	0.147725	0.398097	0.261474	0.260985	-0.0225212	0.908696	-0.627834	#DIV/0!	-0.113749	0.647789
P04004	Vitronectin	-0.445569	0.0087065	0.143307	0.589732	0.588875	0.06708	-0.210018	0.273208	-0.446397	0.138094	0.5203	0.0523419	0.322829	0.317961	0.236379	0.408492
Q7L5Y9	E3 ubiquitin-protein transferase MAEA	0.339271	0.00873207	-0.3536	#DIV/0!	-0.69287	#DIV/0!	0.200696	0.271446	0.232356	0.0512236	0.187242	0.00897157	-0.666283	#DIV/0!	-0.0316597	0.852958
Q7Z6E9	E3 ubiquitin-protein ligase RBBP6	0.417078	0.00875168	-0.0878933	#DIV/0!	-0.504972	#DIV/0!	0.316084	0.0703579	0.532774	0.00134948	-0.187475	0.397857	-0.548889	#DIV/0!	-0.216691	0.140605
P05997	Collagen alpha-2(V) chain	-0.936543	0.00905168	-0.286652	0.501078	0.649891	0.14677	-0.676587	0.0527416	-1.50909	0.000539573	0.710035	0.083071	1.12396	0.0697152	0.8325	0.0134125
Q96F85	CB1 cannabinoid receptor-interacting protein 1	-0.590719	0.0091197	0.254767	0.148337	0.845487	0.00438314	-0.252525	0.253472	-0.601291	0.025931	0.330168	0.163287	0.753832	0.0233536	0.348766	0.19572
Q9NVM1	Protein eva-1 homolog B	-0.368784	0.00917455	0.31759	0.0158732	0.686374	0.000565504	0.0430403	0.826129	-0.0241939	0.803622	-0.311613	0.265709	0.33923	0.000131054	0.0672342	0.717467
O00408	cGMP-dependent 3',5'-cyclic phosphodiesterase	-0.564725	0.00929511	-0.239238	0.0897012	0.325488	0.0235074	-0.43453	0.0111622	-0.624649	0.00223075	0.121727	0.294674	0.426662	0.0561803	0.190119	0.258614
Q7L0Y3	tRNA methyltransferase 10 homolog C	0.412283	0.00976912	-0.141741	0.303162	-0.554024	0.00485698	0.190673	0.22613	0.339992	0.0521809	0.0866787	0.422837	-0.710188	0.0167188	-0.149319	0.373826
O60828	Polyglutamine-binding protein 1	0.565532	0.00983417	-0.305714	#DIV/0!	-0.871246	#DIV/0!	0.391282	0.136306	0.679773	0.00285587	-0.156919	0.705483	-0.94281	#DIV/0!	-0.288491	0.240003
Q6NSJ5	Volume-regulated anion channel subunit LRRC8E	0.413171	0.00997525	-0.363914	#DIV/0!	-0.777085	#DIV/0!	0.257754	0.226476	0.775946	0.0124346	-0.386322	0.065124	-1.11631	#DIV/0!	-0.518191	0.0717316
Q02388	Collagen alpha-1(VII) chain	-0.806966	0.0103168	-0.434334	0.136333	0.372632	0.0362132	-0.657913	0.0296893	-0.704874	0.0226692	-0.0155711	0.98093	0.185119	0.391789	0.0469605	0.727094
O15381	Nuclear valosin-containing protein-like	0.341244	0.0103255	0.113408	#DIV/0!	-0.227836	#DIV/0!	0.295676	0.0218482	0.239726	0.0370343	0.0480805	0.733056	-0.0728802	#DIV/0!	0.0559509	0.483753
P50579	Methionine aminopeptidase 2	0.373769	0.0103696	-0.04423	0.720967	-0.417999	0.0195346	0.206569	0.117461	0.361502	0.00168069	0.0115271	0.441602	-0.380819	0.0457961	-0.154933	0.136221
P01876	Immunoglobulin heavy constant alpha 1	-0.933277	0.0104941	0.564639	0.214289	1.49792	0.00958898	-0.334111	0.368391	-0.268963	0.493695	-0.121796	0.441071	0.580743	0.0765305	-0.0651481	0.887765
O60841	Eukaryotic translation initiation factor 5B	0.368928	0.010956	0.0177948	0.94933	-0.351133	0.255071	0.228475	0.143069	0.434091	0.00306899	-0.0288191	0.831742	-0.484471	0.160482	-0.205617	0.184984
O43847	Nardilysin	0.262012	0.0112872	0.0793566	0.622986	-0.182655	0.261235	0.18895	0.0651643	0.326471	0.0031456	-0.0372629	0.674186	-0.289704	0.32505	-0.137521	0.160584
P01024	Complement C3	-0.446123	0.0114126	0.510281	0.0594378	0.956405	0.00716355	-0.0635615	0.757354	-0.273999	0.128622	-0.0210447	0.934165	0.714545	0.120415	0.210437	0.383422
O15230	Laminin subunit alpha-5	-0.597731	0.0114221	-0.361072	0.0624832	0.236659	0.372227	-0.503067	0.011683	-0.735252	0.000636772	0.309875	0.0422071	0.273522	0.0295374	0.232185	0.0999543
P60983	Glia maturation factor beta	0.566825	0.0117015	0.302209	#DIV/0!	-0.264616	#DIV/0!	0.513902	0.018567	0.617251	0.00880325	-0.0552988	0.68347	-0.31017	#DIV/0!	-0.10335	0.419799
Q5T9A4	ATPase family AAA domain-containing protein 3B	0.6575	0.0117652	0.0402689	#DIV/0!	-0.617231	#DIV/0!	0.534054	0.0419031	0.911693	0.0010026	-0.229134	0.186227	-0.896482	#DIV/0!	-0.377639	0.0832965
Q9NVI7	ATPase family AAA domain-containing protein 3A	0.34197	0.0118461	-0.0821398	0.503385	-0.42411	0.0109952	0.172326	0.187969	0.437386	0.0133449	-0.122665	0.343659	-0.585907	0.0302572	-0.26506	0.107448
Q9NW64	Pre-mRNA-splicing factor RBM22	0.698441	0.011887	-0.202385	#DIV/0!	-0.900827	#DIV/0!	0.518276	0.0918539	0.925362	0.00310652	-0.194553	0.89049	-1.16012	#DIV/0!	-0.407086	0.135349
Q9NR56	Muscleblind-like protein 1	0.241329	0.0119809	-0.435335	#DIV/0!	-0.676664	#DIV/0!	0.105996	0.516476	0.401943	0.0212393	-0.0940877	0.780435	-0.903804	#DIV/0!	-0.295947	0.134734
Q86VM9	Zinc finger CCCH domain-containing protein 18	0.593515	0.0124388	-0.586324	#DIV/0!	-1.17984	#DIV/0!	0.357547	0.264363	0.670114	0.00815226	-0.177278	0.0976255	-1.15576	#DIV/0!	-0.312567	0.29067
P12110	Collagen alpha-2(VI) chain	-0.559939	0.0125829	0.252094	0.211341	0.812033	0.00352053	-0.235126	0.30014	-0.813634	0.00120742	0.2904	0.296061	1.16607	0.00576071	0.578508	0.0147684
Q7Z739	YTH domain-containing family protein 3	0.355903	0.0126965	-0.0641498	0.707448	-0.420053	0.040743	0.187882	0.179392	0.39363	0.00862409	-0.00620813	0.946203	-0.591447	0.0575103	-0.205748	0.151093
Q9P0I2	ER membrane protein complex subunit 3	0.373551	0.0127418	0.0109504	0.950079	-0.362601	0.0779439	0.228511	0.1057	0.445123	0.00249179	-0.154524	0.442069	-0.477768	0.0563843	-0.216612	0.0998792
Q9P013	Spliceosome-associated protein CWC15 homolog	0.673631	0.0128779	-0.262305	#DIV/0!	-0.935936	#DIV/0!	0.486444	0.112899	0.794456	0.0055473	-0.147785	0.39048	-1.0298	#DIV/0!	-0.308012	0.253192
Q9NRN7	L-aminoadipate-semialdehyde dehydrogenase-phosphopantetheinyl transferase	0.690218	0.0129033	0.184879	#DIV/0!	-0.505339	#DIV/0!	0.58915	0.0284271	0.256714	0.729416	-0.170317	0.718683	0.531986	#DIV/0!	0.332436	0.653766
P05452	Tetranectin	-0.502482	0.0137433	-0.237412	0.381957	0.26507	0.411766	-0.396454	0.0287842	-0.56205	0.00522062	0.0129502	0.766958	0.285461	0.132364	0.165596	0.358665
A1L4H1	Soluble scavenger receptor cysteine-rich domain-containing protein SSC5D	-1.02263	0.013774	0.0275155	0.909592	1.05015	0.031082	-0.602574	0.044572	-1.03964	0.00177483	0.265072	0.139884	1.1243	0.0094736	0.437071	0.22331
P12955	Xaa-Pro dipeptidase	-0.295788	0.0141166	0.0687679	0.408327	0.364556	0.0173025	-0.149965	0.155564	-0.110949	0.298209	0.00225504	0.783361	0.0291715	0.77344	-0.0390162	0.728576
P79483	HLA class II histocompatibility antigen, DR beta 3 chain	0.699613	0.0141967	-0.268092	0.543005	-0.967705	0.0686969	0.312531	0.330924	0.741728	0.0264925	-0.310669	0.297971	-0.476972	0.23787	-0.429197	0.147278
P46782	40S ribosomal protein S5	0.446243	0.0142804	0.0681572	0.720359	-0.378085	0.109311	0.295008	0.0744315	0.431459	0.0123179	0.132238	0.33528	-0.415765	0.305741	-0.136451	0.353387
Q14161	ARF GTPase-activating protein GIT2	0.571141	0.014402	-0.414269	#DIV/0!	-0.985411	#DIV/0!	0.374059	0.194385	0.688425	0.00281219	-0.208353	0.65534	-1.01163	#DIV/0!	-0.314366	0.225959
Q8N7H5	RNA polymerase II-associated factor 1 homolog	0.431367	0.0144313	-0.177233	#DIV/0!	-0.6086	#DIV/0!	0.309647	0.109425	0.67806	0.000170616	-0.320381	0.0362006	-0.781606	#DIV/0!	-0.368414	0.0652413
Q15257	Serine/threonine-protein phosphatase 2A activator	-0.317651	0.0147292	0.0198692	0.902592	0.33752	0.0845213	-0.182643	0.16581	0.0684868	0.61751	-0.217136	0.273628	-0.139562	0.34065	-0.25113	0.0517604
P00450	Ceruloplasmin	-0.517222	0.0147983	0.785452	0.000854302	1.30267	0.000259398	0.00384786	0.988337	-0.12353	0.497158	-0.181464	0.691541	0.794299	0.0634864	0.127378	0.642443
Q9UHJ6	Sedoheptulokinase	-0.333053	0.0148456	-0.262371	0.531888	0.0706823	0.829562	-0.30478	0.098714	-0.353926	0.132321	0.24997	0.226581	0.0658649	0.514703	0.0491458	0.837561
O43615	Mitochondrial import inner membrane translocase subunit TIM44	0.26242	0.0155345	0.0411847	0.75792	-0.221235	0.131439	0.173926	0.0829294	0.295015	0.00231282	-0.0435529	0.678827	-0.297758	0.0407613	-0.12109	0.150964
Q16363	Laminin subunit alpha-4	-0.471515	0.0162817	-0.058084	0.709546	0.413431	0.078983	-0.306142	0.0570825	-0.518936	0.0153173	0.251496	0.187267	0.332992	0.0689759	0.212793	0.286297
Q99567	Nuclear pore complex protein Nup88	0.341692	0.0165628	-0.241954	0.216376	-0.583646	0.0171608	0.108234	0.475112	0.368695	0.00455698	-0.0581345	0.181378	-0.685021	0.014524	-0.260462	0.092127
Q56VL3	OCIA domain-containing protein 2	0.544745	0.0169213	-0.603211	#DIV/0!	-1.14796	#DIV/0!	0.315154	0.309315	1.01893	0.0193305	-0.0881294	0.787901	-2.00821	#DIV/0!	-0.703781	0.0917509
P02656	Apolipoprotein C-III	-0.919943	0.0173057	0.548817	0.229626	1.46876	0.0174175	-0.332439	0.400806	-0.700187	0.0800055	0.204102	0.274611	1.05562	0.0727461	0.367748	0.39444
P84085	ADP-ribosylation factor 5	0.3781	0.0173255	-0.0647068	0.785579	-0.442807	0.176301	0.200978	0.178823	0.353526	0.00130118	0.0355586	0.843075	-0.446072	0.188706	-0.152548	0.286071
P04196	Histidine-rich glycoprotein	-0.566817	0.0173905	0.798825	0.000464123	1.36564	0.000695275	-0.02056	0.940833	-0.575044	0.0223797	0.397093	0.0985825	1.12954	0.00137965	0.554484	0.0935071
Q99707	Methionine synthase	0.171903	0.0175465	0.249377	#DIV/0!	0.0774735	#DIV/0!	0.187398	0.00561464	-0.112666	0.315031	0.35952	0.425875	0.287091	#DIV/0!	0.300064	0.0375833
Q9H6Q4	Cytosolic iron-sulfur assembly component 3	-0.394967	0.0179024	-0.0383694	0.795729	0.356598	0.0612008	-0.252328	0.0907212	-0.260139	0.0951229	-0.152727	0.609274	0.254435	0.109164	0.00781077	0.953525
P00734	Prothrombin	-0.552855	0.0179129	0.629839	0.000744721	1.18269	0.000220934	-0.0797771	0.755477	-0.186618	0.413963	-0.145075	0.913939	0.728331	0.0837471	0.106841	0.705596
P02462	Collagen alpha-1(IV) chain	-0.548622	0.0181724	-0.340124	0.112593	0.208497	0.427698	-0.465223	0.0277854	-0.61233	0.0131345	0.34918	0.0763667	0.0985232	0.567815	0.147107	0.393761
P00738	Haptoglobin	-0.680963	0.018364	0.522049	0.357987	1.20301	0.0756121	-0.199758	0.566843	-0.345771	0.291828	-0.012739	0.981464	0.833789	0.170477	0.146013	0.697083
Q86U28	Iron-sulfur cluster assembly 2 homolog, mitochondrial	-0.707985	0.0183788	0.0894327	#DIV/0!	0.797418	#DIV/0!	-0.548501	0.0740616	-0.555544	0.0218228	-0.0459385	0.653598	0.538474	#DIV/0!	0.0070427	0.975429
P08603	Complement factor H	-0.481509	0.018434	0.327378	0.113443	0.808888	0.00244636	-0.157954	0.460615	-0.386672	0.0665546	0.0781054	0.90865	0.569523	0.106979	0.228717	0.289034
P22033	Methylmalonyl-CoA mutase, mitochondrial	0.271111	0.0184495	-0.0218956	0.854612	-0.293007	0.0545022	0.153909	0.152641	0.328293	0.0060815	-0.140944	0.0907709	-0.372891	0.0588718	-0.174384	0.104416
Q12765	Secernin-1	-0.300285	0.0188109	0.0965757	0.57847	0.39686	0.0554483	-0.14154	0.303321	-0.00116359	0.993653	-0.181901	0.440336	0.051225	0.749937	-0.140377	0.299
Q15599	Na(+)/H(+) exchange regulatory cofactor NHE-RF2	-0.36905	0.0188618	0.0834984	0.74695	0.452548	0.120182	-0.188031	0.282284	-0.281712	0.104695	0.00375898	0.954922	0.235272	0.495352	0.0936814	0.541038
Q71RC2	La-related protein 4	-0.240758	0.0195264	-0.17075	0.349215	0.0700083	0.669234	-0.198753	0.0853513	0.0738875	0.687184	-0.0186151	0.975613	-0.553324	0.220571	-0.272641	0.176885
P62995	Transformer-2 protein homolog beta	0.74496	0.0195274	-0.154866	#DIV/0!	-0.899826	#DIV/0!	0.564995	0.0925046	1.0209	0.00434393	-0.237559	0.131763	-1.21414	#DIV/0!	-0.455903	0.074689
P00352	Aldehyde dehydrogenase 1A1	-0.842674	0.0195505	0.541769	0.345101	1.38444	0.0643953	-0.288897	0.471575	-0.602993	0.0753191	-0.0475933	0.778727	0.919297	0.211124	0.314096	0.405964
P55212	Caspase-6	0.235297	0.0196023	-0.0742327	#DIV/0!	-0.30953	#DIV/0!	0.173391	0.111943	0.340477	0.0587471	0.0759129	0.762309	-0.595803	#DIV/0!	-0.167086	0.290553
P05155	Plasma protease C1 inhibitor	-0.502621	0.0196434	0.6208	0.104924	1.12342	0.0243078	-0.0532523	0.837552	-0.0817275	0.697497	-0.186095	0.52162	0.710407	0.156208	0.0284752	0.920506
Q9HCE1	Helicase MOV-10	0.333133	0.0197931	0.00478894	0.972241	-0.328345	0.0242403	0.201796	0.124149	0.40397	0.00620439	0.0181052	0.722959	-0.516636	0.0865069	-0.202174	0.107992
Q9Y5L0	Transportin-3	0.311434	0.0198715	-0.0920518	0.567606	-0.403486	0.0358158	0.15004	0.266019	0.326389	0.0232484	0.0501352	0.530309	-0.489099	0.116877	-0.17635	0.186822
Q6ZQQ6	WD repeat-containing protein 87	0.481695	0.0203635	0.0934247	#DIV/0!	-0.388271	#DIV/0!	0.404041	0.0387345	0.4357	0.00996294	0.0303887	0.996439	-0.326669	#DIV/0!	-0.0316588	0.808869
P36404	ADP-ribosylation factor-like protein 2	0.310959	0.020397	0.0515895	0.822516	-0.259369	0.224621	0.207211	0.126841	0.121384	0.364648	0.0664766	0.167391	0.0189474	0.832871	0.0858275	0.537543
P05546	Heparin cofactor 2	-0.732861	0.0206547	0.420336	0.190096	1.1532	0.0171441	-0.271583	0.356048	-0.371763	0.101136	-0.303279	0.456862	0.878325	0.121431	0.100181	0.733733
Q9ULU4	Protein kinase C-binding protein 1	-0.89246	0.0207779	-0.872645	#DIV/0!	0.0198153	#DIV/0!	-0.888497	0.0178711	-0.989456	0.034049	0.538383	0.185169	-0.324576	#DIV/0!	0.100959	0.752929
P00746	Complement factor D	-0.420707	0.0210277	0.18946	0.26151	0.610168	0.0143668	-0.0546066	0.789391	-0.0889327	0.760182	-0.041071	0.10089	0.337899	0.301105	0.034326	0.912057
Q8WUP2	Filamin-binding LIM protein 1	0.55186	0.0212122	-0.243771	0.569085	-0.79563	0.168667	0.233608	0.355348	0.65053	0.00378241	-0.0591836	0.31444	-0.840692	0.102615	-0.416922	0.12485
O94760	N(G),N(G)-dimethylarginine dimethylaminohydrolase 1	-0.68518	0.021487	0.794853	0.157927	1.48003	0.0353289	-0.0931668	0.809486	-0.486706	0.135488	-0.163898	0.747958	1.30891	0.0396537	0.393539	0.277158
O95487	Protein transport protein Sec24B	0.44855	0.0215953	-0.348765	#DIV/0!	-0.797315	#DIV/0!	0.289087	0.223871	0.666179	0.00259599	-0.179893	0.543398	-1.05268	#DIV/0!	-0.377092	0.0916277
P12109	Collagen alpha-1(VI) chain	-0.478802	0.0218257	0.357125	0.0817071	0.835927	0.000977091	-0.144432	0.522983	-0.781297	0.00192801	0.387869	0.11516	1.25361	0.0064507	0.636865	0.007359
P49407	Beta-arrestin-1	-0.424027	0.0218615	-0.275289	0.0989049	0.148737	0.214149	-0.364532	0.0368735	-0.387328	0.037173	0.0692321	0.676647	0.0131357	0.757797	0.0227961	0.820452
P61758	Prefoldin subunit 3	0.48157	0.0226187	0.01015	0.954613	-0.47142	0.0224381	0.293002	0.134843	0.412024	0.0481419	0.0663139	0.95393	-0.576461	0.0294453	-0.119022	0.45887
P35555	Fibrillin-1	-0.602471	0.022717	-0.0720842	0.776881	0.530387	0.071124	-0.390316	0.103395	-0.715541	0.0134787	0.240663	0.506493	0.7124	0.0193675	0.325224	0.185768
P56182	Ribosomal RNA processing protein 1 homolog A	0.508777	0.0227536	-0.127994	0.626689	-0.636771	0.047789	0.254069	0.206591	0.464715	0.00689844	-0.0573657	0.99604	-0.520061	0.120547	-0.210647	0.28892
Q9BW27	Nuclear pore complex protein Nup85	0.590934	0.0227542	-0.751471	#DIV/0!	-1.34241	#DIV/0!	0.322453	0.368068	0.722901	0.0193943	-0.0912321	0.878744	-1.51511	#DIV/0!	-0.400447	0.259943
P36969	Phospholipid hydroperoxide glutathione peroxidase	0.240371	0.0233622	0.0732925	0.488536	-0.167078	0.228905	0.173539	0.0618486	0.15772	0.0797488	0.0698575	0.66903	-0.0408452	0.52145	0.0158199	0.83075
P49792	E3 SUMO-protein ligase RanBP2	0.397296	0.0237953	-0.0495489	0.849312	-0.446844	0.175978	0.218558	0.193895	0.435727	0.00372743	-0.117615	0.0651474	-0.503516	0.0687499	-0.21717	0.187716
P0DOX8	Immunoglobulin lambda-1 light chain	-0.760813	0.0238244	0.311947	0.487873	1.07276	0.0412218	-0.331709	0.318655	-0.326543	0.381997	-0.0245217	0.607696	0.583254	0.106086	-0.00516592	0.989722
Q04941	Proteolipid protein 2	0.491227	0.0243625	-0.0229991	0.920842	-0.514226	0.0539674	0.285537	0.177246	0.218445	0.223588	0.237677	0.338926	-0.172585	0.272199	0.0670918	0.60164
Q9NZH8	Interleukin-36 gamma	0.994497	0.0245485	-0.188746	0.589107	-1.18324	0.0296635	0.5212	0.155467	0.0313187	0.941375	0.74234	0.523343	0.37845	0.532622	0.489881	0.297899
Q9Y6G9	Cytoplasmic dynein 1 light intermediate chain 1	0.216575	0.0247784	0.052043	0.719686	-0.164532	0.320666	0.150762	0.076958	0.248105	0.000920738	-0.0299809	0.681672	-0.178411	0.210354	-0.0973428	0.245288
P02787	Serotransferrin	-0.533687	0.0252054	0.620605	0.00404961	1.15429	0.0023982	-0.0719701	0.775323	-0.232072	0.355979	-0.0139269	0.885496	0.763917	0.0849108	0.160102	0.601426
Q9UH17	DNA dC->dU-editing enzyme APOBEC-3B	0.680212	0.0253354	0.0386743	0.870774	-0.641538	0.0623237	0.423597	0.0994729	1.50098	6.72289e-05	-0.775505	0.0220807	-1.75325	0.0287737	-1.07739	0.00140074
Q6P597	Kinesin light chain 3	0.390004	0.0254305	-0.0952332	0.604679	-0.485237	0.0673575	0.195909	0.211173	-0.0843834	0.556592	0.406356	0.099596	0.215431	0.507044	0.280293	0.090736
Q8N4C8	Misshapen-like kinase 1	0.24356	0.0254429	-0.258965	#DIV/0!	-0.502524	#DIV/0!	0.143055	0.307945	0.108165	0.419482	0.016625	0.767192	-0.248359	#DIV/0!	0.0348901	0.811435
P50225	Sulfotransferase 1A1	-0.324014	0.0259795	-0.078073	0.599486	0.245941	0.132569	-0.176449	0.199661	-0.167972	0.265513	-0.034953	0.565645	0.0684287	0.94387	-0.00847714	0.950616
P02461	Collagen alpha-1(III) chain	-0.922876	0.0260376	-0.198362	0.682305	0.724514	0.10674	-0.633071	0.12008	-1.37993	0.00452437	0.500863	0.266445	1.28948	0.0830543	0.746862	0.0395275
Q9NXF1	Testis-expressed protein 10	0.415508	0.0261069	-0.156807	0.657105	-0.572315	0.139522	0.186582	0.339003	0.495213	0.000692231	-0.115667	0.51675	-0.721833	0.10368	-0.308632	0.119478
P20908	Collagen alpha-1(V) chain	-0.72439	0.0263757	-0.799078	0.065488	-0.0746879	0.769774	-0.754265	0.0209088	-1.27002	0.000988039	0.648815	0.142223	0.225229	0.0825896	0.515752	0.0377203
P0DOX3	Immunoglobulin delta heavy chain	-0.503419	0.0268318	0.0619641	0.867925	0.565383	0.138087	-0.277266	0.246263	-0.51061	0.109312	0.243563	0.620459	0.666993	0.0485388	0.233344	0.448751
Q12769	Nuclear pore complex protein Nup160	0.350281	0.0274709	-0.084703	0.680347	-0.434984	0.0865305	0.176287	0.258275	0.221967	0.0905952	0.116029	0.425225	-0.323273	0.0783474	-0.0456794	0.722367
Q06481	Amyloid beta precursor like protein 2	0.148374	0.0275893	0.189592	0.0103013	0.041218	0.67707	0.164861	0.00585751	0.094254	0.230889	0.0623559	0.327956	0.115365	0.141698	0.0706071	0.319004
P11047	Laminin subunit gamma-1	-0.590191	0.0278372	-0.19031	0.389074	0.399881	0.292421	-0.430239	0.0327673	-0.627229	0.00223614	0.0715172	0.0118546	0.465626	0.092254	0.196991	0.320397
P01011	Alpha-1-antichymotrypsin	-0.479372	0.0282069	0.505749	0.0286444	0.98512	0.00128828	-0.0853235	0.716516	-0.22254	0.322613	0.0900763	0.905199	0.500966	0.0434771	0.137217	0.595703
P02768	Albumin	-0.685132	0.0283264	0.615915	0.0245165	1.30105	0.005587	-0.164713	0.572766	-0.469573	0.0880261	0.0955233	0.258306	0.974925	0.0390837	0.304859	0.384132
Q9P0V3	SH3 domain-binding protein 4	-0.301608	0.0287206	-0.157235	0.344006	0.144373	0.278803	-0.243859	0.0678764	-0.16761	0.223446	-0.170433	0.328045	0.0998844	0.446215	-0.0762486	0.431169
A0A0C4DH29	Immunoglobulin heavy variable 1-3	-0.639172	0.0291482	0.403964	0.349132	1.04314	0.0823607	-0.0132903	0.968577	-0.170767	0.575127	0.0620855	0.767951	0.352702	0.278997	0.157477	0.718861
Q04637	Eukaryotic translation initiation factor 4 gamma 1	0.277588	0.029316	-0.155992	0.259536	-0.43358	0.0292829	0.104156	0.381085	0.343667	0.00783265	0.028633	0.993515	-0.640056	0.0160697	-0.23951	0.0893765
Q6UB35	Monofunctional C1-tetrahydrofolate synthase, mitochondrial	0.632484	0.0293602	-0.136397	0.565109	-0.76888	0.0409293	0.324932	0.171048	0.857098	0.0020756	-0.148233	0.274168	-1.28258	0.0332812	-0.532166	0.0634877
P61020	Ras-related protein Rab-5B	0.178311	0.0293856	-0.169428	0.109681	-0.347739	0.00817163	0.0392151	0.670851	-0.0090547	0.915394	0.193319	0.157254	-0.187	0.414659	0.0482698	0.59229
P82094	TATA element modulatory factor	-0.491237	0.0295784	-0.164732	0.68044	0.326505	0.425816	-0.295334	0.270067	0.237367	0.219932	-0.760989	0.191245	-0.403089	0.496011	-0.532701	0.0525405
P10768	S-formylglutathione hydrolase	-0.567922	0.0299183	-0.177983	0.606146	0.389939	0.306369	-0.333959	0.16778	-0.045584	0.796208	-0.550643	0.447872	-0.329908	0.433898	-0.288375	0.246224
P30530	Tyrosine-protein kinase receptor UFO	-0.496299	0.0299218	-0.153958	#DIV/0!	0.342341	#DIV/0!	-0.427831	0.0543624	-0.822564	0.0021444	0.360965	0.108101	0.633905	#DIV/0!	0.394733	0.0130735
P49585	Choline-phosphate cytidylyltransferase A	0.357781	0.0307248	-0.194841	0.415981	-0.552622	0.0766065	0.136732	0.386652	0.329451	0.0215822	-0.0693272	0.740599	-0.481055	0.145113	-0.192719	0.280705
P09601	Heme oxygenase 1	0.341742	0.0307439	-0.269224	0.0462269	-0.610967	0.00123384	0.0973556	0.541197	0.172599	0.244154	0.27539	0.412984	-0.47193	0.00187679	-0.075243	0.630639
P51153	Ras-related protein Rab-13	0.553504	0.0307626	-0.315135	#DIV/0!	-0.86864	#DIV/0!	0.379776	0.187645	0.749473	0.0356333	-0.128235	0.841495	-1.13234	#DIV/0!	-0.369696	0.256505
P49746	Thrombospondin-3	-0.560125	0.0309747	-0.0412093	0.924807	0.518915	0.382374	-0.352558	0.165386	-0.578832	0.0392804	-0.0241352	0.828541	0.734628	0.00585842	0.226274	0.436554
Q9UQ80	Proliferation-associated protein 2G4	0.333342	0.0310427	-0.13794	0.503206	-0.471282	0.051842	0.14483	0.372354	0.420006	0.00734967	-0.127806	0.171187	-0.425798	0.162739	-0.275177	0.0454792
Q96DB5	Regulator of microtubule dynamics protein 1	0.370076	0.031158	-0.142431	0.535551	-0.512508	0.0855076	0.165073	0.311671	0.479184	0.0225145	-0.0696094	0.395578	-0.938688	0.0207752	-0.314111	0.149263
P08123	Collagen alpha-2(I) chain	-0.872552	0.031197	0.0271474	0.956123	0.899699	0.069086	-0.512672	0.205607	-1.3922	0.00247204	0.631885	0.130678	1.54136	0.0690926	0.879524	0.0142863
Q92597	Protein NDRG1	0.37484	0.0312636	-0.290837	0.124074	-0.665678	0.0115505	0.108569	0.536432	0.290817	0.0825717	0.123108	0.542842	-0.681967	0.16108	-0.182247	0.323657
Q13895	Bystin	0.257566	0.031437	-0.111782	0.501919	-0.369348	0.0676658	0.109827	0.343743	0.265434	0.00481311	-0.014286	0.982409	-0.356678	0.0688226	-0.155607	0.162171
B0FP48	Uroplakin-3b-like protein 1	-0.383701	0.0314628	-0.704132	0.159968	-0.32043	0.440516	-0.575959	0.0441401	-0.563506	0.0419883	0.0717498	0.601989	0.270983	0.821465	-0.0124535	0.966091
O95865	N(G),N(G)-dimethylarginine dimethylaminohydrolase 2	-0.358609	0.0320551	0.0942937	0.632727	0.452903	0.0505574	-0.177448	0.274085	-0.47313	0.0383212	0.346661	0.264921	0.503456	0.0437532	0.295682	0.172218
B5ME19	Eukaryotic translation initiation factor 3 subunit C-like protein	0.247445	0.0324758	-0.0508632	0.470334	-0.298308	0.00117837	0.128122	0.169779	0.282874	0.00501415	-0.0510832	0.858055	-0.365779	0.0367298	-0.154752	0.128821
O95373	Importin-7	0.303803	0.0328925	-0.0289013	0.812591	-0.332704	0.0274964	0.170721	0.177277	0.380871	0.00224301	-0.0698536	0.642207	-0.391227	0.0509766	-0.21015	0.0426728
Q13523	Serine/threonine-protein kinase PRP4 homolog	0.834296	0.0332495	-0.360121	#DIV/0!	-1.19442	#DIV/0!	0.595412	0.134519	0.842712	0.0100974	-0.274232	0.824053	-0.937017	#DIV/0!	-0.247299	0.514272
Q9Y4I1	Unconventional myosin-Va	0.415153	0.033545	-0.477513	#DIV/0!	-0.892667	#DIV/0!	0.23662	0.34563	0.49529	0.0258571	-0.243418	0.00129551	-0.809522	#DIV/0!	-0.25867	0.304445
P41218	Myeloid cell nuclear differentiation antigen	0.506905	0.0335505	0.0490518	0.693398	-0.457853	0.107736	0.323764	0.0667462	1.19862	0.0023485	-0.69518	0.0987152	-1.43565	0.00899957	-0.874855	0.0164766
Q96I25	Splicing factor 45	0.468632	0.0335705	-0.370428	#DIV/0!	-0.839059	#DIV/0!	0.30082	0.236885	0.742338	0.00188754	-0.281713	0.339509	-1.10476	#DIV/0!	-0.441518	0.0970926
O94885	SAM and SH3 domain-containing protein 1	0.286373	0.033618	0.184245	#DIV/0!	-0.102128	#DIV/0!	0.265947	0.0442025	-0.215152	0.185343	0.416152	0.295181	0.484771	#DIV/0!	0.4811	0.0158572
P62906	60S ribosomal protein L10a	0.459832	0.0337469	-0.137803	0.475297	-0.597635	0.0386652	0.220778	0.250818	0.546062	0.0017664	-0.0365592	0.310557	-0.767611	0.0472775	-0.325284	0.0606106
P26641	Elongation factor 1-gamma	0.367517	0.0342165	-0.0118671	0.943571	-0.379384	0.143932	0.215763	0.120054	0.493977	0.000809724	-0.123042	0.0625133	-0.556974	0.00658742	-0.278214	0.0723843
P00747	Plasminogen	-0.357874	0.0349656	0.482627	0.0890537	0.840501	0.0138432	-0.0216737	0.917421	-0.166148	0.371376	-0.0828847	0.659299	0.579597	0.147525	0.144474	0.502507
P04003	C4b-binding protein alpha chain	-0.553175	0.0351774	0.456092	0.176535	1.00927	0.0282096	-0.149468	0.576424	0.0108646	0.976392	-0.272447	0.793825	0.121287	0.806541	-0.160333	0.687482
Q6Y7W6	GRB10-interacting GYF protein 2	0.246222	0.0353568	0.0385009	0.741577	-0.207721	0.165212	0.163133	0.0794023	0.306662	0.00151145	-0.015675	0.942384	-0.381809	0.0198952	-0.143529	0.140066
Q6ZSR9	Uncharacterized protein FLJ45252	0.328859	0.035911	-0.0606456	0.716464	-0.389504	0.0698077	0.173057	0.179041	0.428685	2.79663e-05	-0.0489864	0.882616	-0.549028	0.0219366	-0.255628	0.0474106
Q9NY15	Stabilin-1	-0.386755	0.0364091	0.0154373	0.91792	0.402192	0.0844176	-0.225878	0.143209	-0.0556323	0.782698	-0.0633905	0.976011	-0.0844388	0.72606	-0.170246	0.403899
Q9NVP1	ATP-dependent RNA helicase DDX18	0.585929	0.0365302	-0.124823	0.68053	-0.710752	0.0455088	0.301628	0.211503	0.517076	0.0269433	-0.0956156	0.93215	-0.672548	0.0176647	-0.215448	0.400294
Q14318	Peptidyl-prolyl cis-trans isomerase FKBP8	0.222667	0.0366916	0.00552914	0.951811	-0.217138	0.12683	0.135812	0.0918214	0.104595	0.0840523	0.0792004	0.553626	-0.0376194	0.663548	0.0312169	0.68787
Q8NFF5	FAD synthase	0.147939	0.0369557	-0.0395921	0.664531	-0.187531	0.0943749	0.0729266	0.279105	0.158305	0.0114044	0.0281302	0.691338	-0.212244	0.255881	-0.0853781	0.180972
Q9NRW1	Ras-related protein Rab-6B	-0.290529	0.0371655	0.17312	0.269784	0.463649	0.0294295	-0.105069	0.442854	-0.25807	0.0255526	0.0257525	0.326808	0.383188	0.0262975	0.153001	0.209731
Q9H190	Syntenin-2	0.726606	0.0372187	-0.0303179	#DIV/0!	-0.756924	#DIV/0!	0.575221	0.103034	0.0446791	0.924471	1.16612	0.0144411	-0.559189	#DIV/0!	0.530542	0.256052
O00541	Pescadillo homolog	0.968926	0.0372494	-0.593177	#DIV/0!	-1.5621	#DIV/0!	0.656505	0.196848	1.35507	0.00276184	-0.485403	0.0221448	-1.84899	#DIV/0!	-0.698564	0.154189
Q08431	Lactadherin	-0.555838	0.0372678	-0.0455447	#DIV/0!	0.510293	#DIV/0!	-0.453779	0.0615616	-0.67422	0.00332293	-0.00227008	0.11864	0.749327	#DIV/0!	0.22044	0.305603
Q8N1F7	Nuclear pore complex protein Nup93	0.432626	0.0372936	-0.0866278	0.723179	-0.519254	0.115009	0.224925	0.208106	0.541039	0.00126584	-0.117204	0.260991	-0.768441	0.0116117	-0.316115	0.0961329
P25940	Collagen alpha-3(V) chain	-0.781797	0.037304	-0.158391	0.628348	0.623405	0.094883	-0.532435	0.116647	-0.657806	0.0519252	-0.0489325	0.706235	0.6274	0.00557551	0.125371	0.583273
P43007	Neutral amino acid transporter A	0.379233	0.0373892	0.0313333	0.867097	-0.3479	0.185147	0.240073	0.121909	0.429872	0.0424239	-0.0385167	0.672702	-0.382561	0.291142	-0.189798	0.346516
Q9BZZ2	Sialoadhesin	-0.429641	0.0376815	-0.244633	0.160175	0.185007	0.277619	-0.355638	0.0501688	-0.233466	0.256763	-0.00061311	0.968978	-0.0944566	0.726602	-0.122172	0.442527
O60506	Heterogeneous nuclear ribonucleoprotein Q	0.386681	0.0379367	-0.178778	0.133534	-0.565458	0.0236449	0.160497	0.310806	0.508573	0.000913129	-0.155684	0.162665	-0.765299	0.00397343	-0.348075	0.0353645
P60510	Serine/threonine-protein phosphatase 4 catalytic subunit	-0.294908	0.0385242	-0.263874	0.139447	0.0310343	0.989902	-0.282494	0.042014	0.0304473	0.829121	-0.244081	0.0876354	-0.272224	0.305218	-0.312941	0.00490528
Q00587	Cdc42 effector protein 1	0.199786	0.0389044	0.179379	0.382385	-0.0204064	0.95911	0.191623	0.0665691	0.0413862	0.669195	0.118038	0.550868	0.227301	0.310418	0.150237	0.13084
Q9H074	Polyadenylate-binding protein-interacting protein 1	0.253963	0.0392324	0.136656	0.426615	-0.117308	0.555112	0.20704	0.0677842	0.324036	0.0133798	0.0676762	0.704621	-0.349514	0.14002	-0.116996	0.305789
Q8WU90	Zinc finger CCCH domain-containing protein 15	0.349042	0.0392591	0.147699	0.434541	-0.201343	0.295348	0.268505	0.0779551	0.404063	0.00886288	-0.00845167	0.986244	-0.320479	0.153392	-0.135559	0.229609
P04424	Argininosuccinate lyase	-0.379275	0.0394644	0.224355	0.409685	0.60363	0.108439	-0.137823	0.453894	-0.119094	0.501193	-0.0902243	0.952632	0.288136	0.359071	-0.018729	0.927554
P10909	Clusterin	-0.467054	0.0395284	0.151275	0.370945	0.618329	0.0263015	-0.219723	0.271843	-0.473848	0.0204886	0.259878	0.0424387	0.518821	0.00843077	0.254126	0.191734
P46777	60S ribosomal protein L5	0.409868	0.0395337	-0.0936796	0.55682	-0.503548	0.0462834	0.208449	0.223357	0.504922	0.00255213	-0.138158	0.141769	-0.604245	0.0835719	-0.296473	0.0644004
P01009	Alpha-1-antitrypsin	-0.869761	0.0395796	0.833868	0.0251541	1.70363	0.00789051	-0.188309	0.637749	-0.291048	0.374208	-0.158372	0.741915	0.9837	0.0805949	0.102738	0.811661
Q13201	Multimerin-1	-0.556112	0.0395843	-0.134963	#DIV/0!	0.421149	#DIV/0!	-0.471882	0.0652747	-0.439512	0.106774	0.157946	0.20172	0.0300043	#DIV/0!	-0.0323696	0.885418
P26196	Probable ATP-dependent RNA helicase DDX6	0.266578	0.0399804	-0.0822771	0.570205	-0.348855	0.099138	0.127036	0.270179	0.310922	0.00294662	-0.0120708	0.228837	-0.46271	0.0722143	-0.183886	0.109258
Q96HQ2	CDKN2AIP N-terminal-like protein	0.550181	0.0407006	0.279138	#DIV/0!	-0.271042	#DIV/0!	0.495972	0.0555088	0.718784	0.0275405	-0.295274	0.426493	-0.312976	#DIV/0!	-0.222812	0.33651
P02774	Vitamin D-binding protein	-0.609282	0.0407544	0.61325	0.00206582	1.22253	0.00358966	-0.120269	0.650627	-0.365225	0.103735	-0.00124521	0.460832	0.907284	0.0188986	0.244956	0.431905
A3KN83	Protein strawberry notch homolog 1	0.355494	0.0409001	-0.112319	#DIV/0!	-0.467813	#DIV/0!	0.261931	0.13671	0.486062	0.0195032	0.0719594	0.0283709	-0.80091	#DIV/0!	-0.224131	0.242808
Q13042	Cell division cycle protein 16 homolog	-0.52296	0.0411272	-0.859395	#DIV/0!	-0.336435	#DIV/0!	-0.590247	0.0243426	-0.441539	0.07796	0.0340869	0.118231	-0.533365	#DIV/0!	-0.148709	0.364405
P07902	Galactose-1-phosphate uridylyltransferase	-0.414699	0.041316	-0.0370782	0.665709	0.377621	0.141527	-0.263651	0.0535687	-0.247935	0.0522809	-0.0197053	0.83597	0.189322	0.0695067	-0.0157163	0.917047
Q5J8M3	ER membrane protein complex subunit 4	0.216444	0.0417222	0.0447753	0.546288	-0.171669	0.0613757	0.147777	0.0742093	0.409676	0.0026115	-0.122901	0.437003	-0.530607	0.0178454	-0.261899	0.0343836
Q92954	Proteoglycan 4	-1.26071	0.0418761	-1.08616	0.0184431	0.174546	0.64522	-1.15598	0.0127512	-0.764702	0.0816317	-0.499894	0.560594	-0.060261	0.886431	-0.39128	0.212241
Q9H9E3	Conserved oligomeric Golgi complex subunit 4	-0.497978	0.0419007	0.112981	0.726285	0.610959	0.125231	-0.131402	0.630238	0.0298709	0.893637	-0.593517	0.312827	0.0312106	0.825179	-0.161273	0.537235
O95630	STAM-binding protein	0.211274	0.0419119	0.0935494	0.449144	-0.117725	0.439683	0.164184	0.0629118	0.129091	0.0911961	0.0871286	0.48264	-0.0666075	0.434213	0.0350927	0.622946
P02652	Apolipoprotein A-II	-1.06633	0.0419534	0.667455	0.188152	1.73379	0.0261159	-0.372819	0.417857	-0.589298	0.134499	-0.0407269	0.380095	1.15032	0.0701324	0.216479	0.663159
Q8N3F8	MICAL-like protein 1	0.439157	0.0420868	-0.327984	0.126602	-0.76714	0.0186726	0.132301	0.499704	0.21931	0.10271	0.251699	0.193321	-0.546239	0.146378	-0.0870095	0.645948
Q9NTJ3	Structural maintenance of chromosomes protein 4	0.477561	0.0421423	-0.0761421	0.651776	-0.553703	0.0742066	0.25608	0.156075	0.698214	0.00196463	-0.317011	0.0182802	-0.77072	0.0744192	-0.442134	0.0545747
Q9BXV9	EKC/KEOPS complex subunit GON7	-0.588359	0.042176	-0.123248	#DIV/0!	0.465111	#DIV/0!	-0.495337	0.0824366	-0.689972	0.0529149	0.438785	0.0469733	0.229552	#DIV/0!	0.194636	0.457853
P22352	Glutathione peroxidase 3	-0.727968	0.0425113	0.0446226	0.863325	0.77259	0.087933	-0.418932	0.144862	-0.88061	0.00522526	0.424672	0.0410776	0.950077	0.0129507	0.461679	0.130367
P63173	60S ribosomal protein L38	0.458117	0.0426374	-0.151228	0.336879	-0.609345	0.0360901	0.214379	0.236344	0.57037	0.00729256	-0.0461361	0.269909	-0.784135	0.199643	-0.355992	0.111375
Q9UBG3	Cornulin	-1.05906	0.0426456	-0.448178	0.394109	0.610884	0.47946	-0.814709	0.0525047	-1.09998	0.0212767	0.0580146	0.581257	1.02989	0.281837	0.285276	0.517914
O95347	Structural maintenance of chromosomes protein 2	0.332164	0.043429	-0.220056	0.449735	-0.55222	0.0961939	0.111276	0.546499	0.541802	0.00208547	-0.210566	0.0215108	-0.802002	0.023428	-0.430526	0.0198072
P00451	Coagulation factor VIII	0.559048	0.0438841	0.184111	#DIV/0!	-0.374937	#DIV/0!	0.48406	0.0477947	1.21297	0.104649	-0.357061	0.926707	-1.32572	#DIV/0!	-0.728911	0.269691
P62888	60S ribosomal protein L30	0.368717	0.0442001	0.0179474	0.928148	-0.350769	0.0943501	0.228409	0.191959	0.525689	0.00458305	-0.11122	0.265694	-0.518528	0.158836	-0.29728	0.0238306
O43493	Trans-Golgi network integral membrane protein 2	-0.522584	0.0442511	-0.635908	#DIV/0!	-0.113324	#DIV/0!	-0.545249	0.0351931	-0.121221	0.737786	-0.177733	0.721171	-0.738316	#DIV/0!	-0.424027	0.231445
P26639	Threonine--tRNA ligase 1, cytoplasmic	0.325012	0.0443277	-0.0788613	0.746171	-0.403873	0.166932	0.163462	0.333636	0.444811	0.00951978	-0.118921	0.125093	-0.422809	0.192329	-0.281349	0.0622132
P30838	Aldehyde dehydrogenase, dimeric NADP-preferring	-0.68709	0.044722	-0.0104708	0.986722	0.676619	0.319639	-0.416442	0.240545	-0.509488	0.304161	0.300591	0.300518	0.165191	0.874034	0.0930461	0.853642
P60866	40S ribosomal protein S20	0.393035	0.0449592	0.0752162	0.651098	-0.317819	0.103955	0.265907	0.13021	0.42386	0.0216749	0.0429979	0.984311	-0.322603	0.256197	-0.157952	0.217333
Q01081	Splicing factor U2AF 35 kDa subunit	0.382239	0.0451226	-0.29483	0.453876	-0.677069	0.169732	0.111411	0.598527	0.371731	0.0276424	-0.00247481	0.577163	-0.690642	0.234918	-0.26032	0.25528
P41091	Eukaryotic translation initiation factor 2 subunit 3	0.232444	0.0451368	-0.0290682	0.782239	-0.261512	0.0784538	0.127839	0.198942	0.501156	3.23177e-05	-0.262739	0.0261577	-0.527762	0.0150031	-0.373317	0.00093929
P02452	Collagen alpha-1(I) chain	-1.02865	0.0452336	-0.0241355	0.970208	1.00452	0.0962038	-0.626846	0.224616	-1.548	0.00456092	0.653103	0.173573	1.55676	0.104684	0.92115	0.0132875
P39059	Collagen alpha-1(XV) chain	-0.515118	0.0452532	-0.0234289	0.932074	0.49169	0.251122	-0.318443	0.128239	-0.550271	0.00704902	0.175919	0.00647332	0.533343	0.0219453	0.231828	0.283888
P81877	Single-stranded DNA-binding protein 2	-0.194715	0.0454107	0.117608	0.47058	0.312323	0.100891	-0.0697861	0.51185	-0.316482	0.0039031	0.153667	0.320223	0.502537	0.0528178	0.246696	0.0271556
Q9UKJ3	G patch domain-containing protein 8	0.332462	0.045476	-0.254431	#DIV/0!	-0.586893	#DIV/0!	0.215083	0.252744	0.490485	0.0107821	-0.296235	0.029143	-0.606705	#DIV/0!	-0.275402	0.154184
P55769	NHP2-like protein 1	0.390402	0.0460297	-0.234087	0.405566	-0.624489	0.0797791	0.140606	0.4623	0.281016	0.0750664	0.0677712	0.561687	-0.448294	0.330699	-0.14041	0.465279
Q96EY5	Multivesicular body subunit 12A	0.346124	0.0462232	-0.518095	#DIV/0!	-0.864218	#DIV/0!	0.17328	0.459528	0.433668	0.0249649	-0.0435339	0.724608	-0.995773	#DIV/0!	-0.260388	0.266933
Q13283	Ras GTPase-activating protein-binding protein 1	0.291551	0.0464138	-0.155034	0.285581	-0.446585	0.00811625	0.112917	0.431969	0.408956	0.00582192	-0.0993744	0.43261	-0.546948	0.130946	-0.296039	0.0273001
Q9NUL3	Double-stranded RNA-binding protein Staufen homolog 2	0.142132	0.0464153	0.0833559	0.176972	-0.058776	0.272119	0.118622	0.0644579	0.0120678	0.863167	0.160161	0.0229708	-0.00191169	0.947374	0.106554	0.0505308
Q9NSU2	Three-prime repair exonuclease 1	-0.275095	0.0466023	-0.251469	#DIV/0!	0.0236261	#DIV/0!	-0.27037	0.0266754	-0.358029	0.00393468	0.125483	0.604582	0.0640107	#DIV/0!	0.087659	0.286665
P51532	Transcription activator BRG1	0.455826	0.0473284	-0.217623	0.221957	-0.673449	0.0275247	0.186447	0.333972	0.607953	0.000326031	-0.21253	0.00368378	-0.831025	0.00981153	-0.421506	0.0320992
P02749	Beta-2-glycoprotein 1	-0.76115	0.0474555	0.359836	0.571212	1.12099	0.154676	-0.0885583	0.857121	-0.179834	0.673113	-0.104255	0.325221	-0.0235416	0.378268	0.0912761	0.859159
Q8N6H7	ADP-ribosylation factor GTPase-activating protein 2	-0.124184	0.0476907	0.158403	0.320937	0.282588	0.121874	-0.0111493	0.896101	-0.0558939	0.315014	-0.0405815	0.503023	0.189252	0.26957	0.0447446	0.55207
P35442	Thrombospondin-2	0.435306	0.0477762	-0.609036	#DIV/0!	-1.04434	#DIV/0!	0.226437	0.425118	0.531521	0.297865	0.262406	0.896826	-1.49918	#DIV/0!	-0.305084	0.552867
P04066	Tissue alpha-L-fucosidase	-0.610287	0.0478876	0.370581	0.412608	0.980868	0.0578328	-0.21794	0.514545	0.0403001	0.91186	-0.326169	0.418764	0.116192	0.836804	-0.25824	0.464424
Q9NWH9	SAFB-like transcription modulator	0.321351	0.0479619	-0.170397	0.30254	-0.491747	0.0279335	0.124652	0.409177	0.390982	0.010772	-0.0137812	0.931629	-0.699184	0.0113006	-0.26633	0.0906392
Q96RN5	Mediator of RNA polymerase II transcription subunit 15	0.433749	0.0481026	0.226168	#DIV/0!	-0.20758	#DIV/0!	0.392233	0.0590257	0.499111	0.0186677	-0.0816221	0.227763	-0.256682	#DIV/0!	-0.106878	0.329898
O43819	Protein SCO2 homolog, mitochondrial	-0.534708	0.0483065	-0.301205	0.255185	0.233503	0.651048	-0.441307	0.0577005	-0.891258	0.000496724	0.379956	0.020282	0.498232	0.0216678	0.449951	0.0120012
Q8WYA6	Beta-catenin-like protein 1	0.404494	0.0484436	-0.202293	0.10733	-0.606788	0.0246387	0.161779	0.34945	0.383646	0.0111944	0.0194659	0.518913	-0.619362	0.00722068	-0.221867	0.182131
P10321	HLA class I histocompatibility antigen, C alpha chain	0.748935	0.0484677	-0.15349	0.803903	-0.902425	0.184332	0.387965	0.343508	0.881149	0.0705741	-0.693861	0.00901521	-0.265587	0.316943	-0.493183	0.261364
Q9Y295	Developmentally-regulated GTP-binding protein 1	0.334146	0.048649	-0.0577829	0.652787	-0.391929	0.0866106	0.177374	0.182358	0.310465	0.00910092	0.0207973	0.749934	-0.400509	0.0863343	-0.133091	0.312784
P05154	Plasma serine protease inhibitor	-0.365707	0.048667	0.263375	0.221326	0.629082	0.023225	-0.114074	0.546568	-0.366771	0.0482528	0.0726834	0.360026	0.703434	0.0249757	0.252696	0.168721
Q96S52	GPI transamidase component PIG-S	0.27796	0.0488212	-0.0970152	#DIV/0!	-0.374975	#DIV/0!	0.202965	0.131154	0.451095	0.00604965	-0.266615	0.0620383	-0.45463	#DIV/0!	-0.24813	0.109521
P52948	Nuclear pore complex protein Nup98-Nup96	0.277417	0.0488573	-0.18534	0.249354	-0.462757	0.0380104	0.0923141	0.46771	0.371423	0.000605249	-0.110181	0.323112	-0.597684	0.00768659	-0.279109	0.0421907
P01023	Alpha-2-macroglobulin	-0.522014	0.0489708	0.692738	0.255937	1.21475	0.113854	-0.0361133	0.915457	-0.0577509	0.822435	-0.238437	0.582918	0.761163	0.277108	0.0216376	0.94944
P05388	60S acidic ribosomal protein P0	0.335842	0.0489984	-0.204461	0.181151	-0.540303	0.0100294	0.11972	0.470229	0.344502	0.0238528	-0.0634262	0.202391	-0.454044	0.0934099	-0.224781	0.105761
Q96GG9	DCN1-like protein 1	0.311993	0.049093	-0.0794049	#DIV/0!	-0.391398	#DIV/0!	0.233713	0.15462	0.53891	0.0369722	0.014523	0.973743	-0.859754	#DIV/0!	-0.305196	0.167675
P43487	Ran-specific GTPase-activating protein	0.339123	0.0491832	-0.87114	#DIV/0!	-1.21026	#DIV/0!	0.0970704	0.740464	0.417008	0.0440656	0.0811085	0.0762678	-1.44714	#DIV/0!	-0.319937	0.294091
Q8TEM1	Nuclear pore membrane glycoprotein 210	0.302203	0.0494429	0.0733622	0.463255	-0.22884	0.173276	0.210666	0.0461268	0.451506	0.000387297	-0.108625	0.496388	-0.468467	0.0812464	-0.240839	0.0565261
Q9Y6C2	EMILIN-1	-0.338075	0.0494692	0.112209	0.612653	0.450284	0.0455834	-0.157961	0.364365	-0.316916	0.133953	0.256491	0.381644	0.299483	0.210661	0.158955	0.412167
A6NMZ7	Collagen alpha-6(VI) chain	-1.19002	0.0498891	0.137042	0.729421	1.32706	0.0914675	-0.659197	0.137998	-1.03772	0.0135093	0.101168	0.762115	1.37196	0.0148801	0.378525	0.434713
Q9NVH0	Exonuclease 3'-5' domain-containing protein 2	0.19955	0.0500072	0.0317104	#DIV/0!	-0.16784	#DIV/0!	0.165982	0.0765356	0.44198	0.0334403	-0.168208	0.676137	-0.484491	#DIV/0!	-0.275997	0.122075
Q5VIR6	Vacuolar protein sorting-associated protein 53 homolog	-0.169785	0.0500571	-0.0333881	0.891588	0.136397	0.585207	-0.0879471	0.53997	-0.0721695	0.544279	-0.122965	0.601313	-0.121926	0.827378	-0.0157776	0.921039
P02790	Hemopexin	-0.708117	0.0511147	0.732848	0.00259089	1.44097	0.00907183	-0.131731	0.699111	-0.509055	0.138806	0.034823	0.668377	1.35452	0.00419661	0.377324	0.348612
O43670	BUB3-interacting and GLEBS motif-containing protein ZNF207	0.471755	0.0511755	-0.0622404	0.90501	-0.533995	0.32671	0.258157	0.344847	0.292048	0.172074	0.177367	0.396784	-0.528025	0.392204	-0.0338911	0.889289
P41732	Tetraspanin-7	-0.621152	0.0512055	-0.16077	#DIV/0!	0.460382	#DIV/0!	-0.529076	0.0711148	-1.16636	0.00887975	0.856162	0.0547979	0.694631	#DIV/0!	0.637282	0.0840831
P02743	Serum amyloid P-component	-0.718574	0.0514027	-0.21904	0.662893	0.499534	0.223102	-0.518761	0.159143	-0.866577	0.0482898	0.691925	0.0384157	0.417783	0.174434	0.347816	0.316482
Q8TCD5	5'(3')-deoxyribonucleotidase, cytosolic type	-0.615766	0.0515198	0.115748	0.553768	0.731514	0.0586826	-0.32316	0.19571	-0.349613	0.168983	0.0434144	0.521401	0.304533	0.186051	0.0264526	0.920491
P15502	Elastin	-0.821785	0.0515388	-0.784575	0.0326456	0.0372101	0.804631	-0.806901	0.033061	-0.981319	0.0154103	0.474795	0.119459	-0.0472876	0.898163	0.174417	0.458449
Q9H9G7	Protein argonaute-3	0.163537	0.0515686	0.0357157	0.621711	-0.127821	0.1882	0.112408	0.119542	0.167118	0.028194	0.023179	0.760612	-0.166795	0.120797	-0.0547096	0.362437
Q9P0L0	Vesicle-associated membrane protein-associated protein A	0.196541	0.0518498	-0.0786178	0.651786	-0.275159	0.126636	0.0864777	0.419946	0.392869	0.00194753	-0.245213	0.0441514	-0.552685	0.0147749	-0.306392	0.0157754
P62136	Serine/threonine-protein phosphatase PP1-alpha catalytic subunit	0.302129	0.052091	-0.109904	0.715295	-0.412033	0.244319	0.137316	0.426816	0.73507	4.32092e-05	-0.472556	0.000894644	-0.841705	0.0305987	-0.597754	0.00129602
P62249	40S ribosomal protein S16	0.532605	0.0521299	0.0710242	0.762278	-0.461581	0.0694053	0.347973	0.166301	0.603668	0.0209219	-0.0193854	0.544949	-0.550079	0.13849	-0.255696	0.122515
Q96CX2	BTB/POZ domain-containing protein KCTD12	-0.306317	0.0523043	0.167813	0.171359	0.47413	0.0101044	-0.116665	0.436991	-0.306804	0.137588	0.300405	0.0378771	0.380938	0.114447	0.19014	0.325269
Q86Y79	Probable peptidyl-tRNA hydrolase	0.403125	0.0523279	0.117496	#DIV/0!	-0.285628	#DIV/0!	0.345999	0.0885712	0.633808	0.0124361	-0.0374384	0.703346	-0.709558	#DIV/0!	-0.28781	0.106775
Q8NFH3	Nucleoporin Nup43	0.25966	0.052605	-0.306229	0.273814	-0.565889	0.0742826	0.0333042	0.841996	0.295888	0.020888	-0.00155691	0.932666	-0.693087	0.0665455	-0.262584	0.0879032
P35268	60S ribosomal protein L22	0.302551	0.0527741	0.0253825	0.858631	-0.277169	0.166212	0.191684	0.148064	0.340404	0.0199527	0.0336616	0.987797	-0.345546	0.226614	-0.14872	0.253546
Q9UQ13	Leucine-rich repeat protein SHOC-2	0.212688	0.0530044	-0.0190205	0.836897	-0.231709	0.0730817	0.0736631	0.42727	0.370154	0.000728134	-0.121182	0.748544	-0.371984	0.18489	-0.296491	0.00962966
P24386	Rab proteins geranylgeranyltransferase component A 1	-0.331039	0.053119	-0.139912	0.599275	0.191127	0.440495	-0.254588	0.128367	-0.119279	0.419179	-0.117671	0.446571	-0.0212062	0.909394	-0.135309	0.302209
P02647	Apolipoprotein A-I	-0.743124	0.0533766	0.578189	0.119201	1.32131	0.0161386	-0.214599	0.543151	-0.227428	0.449677	-0.267993	0.68416	0.814372	0.132071	0.0128292	0.972008
P01008	Antithrombin-III	-0.545632	0.0536097	0.540216	0.0139939	1.08585	0.00931414	-0.111292	0.673893	-0.257028	0.264445	-0.0960965	0.89405	0.854754	0.0242855	0.145736	0.606714
P55809	Succinyl-CoA:3-ketoacid coenzyme A transferase 1, mitochondrial	0.558042	0.0539304	0.0705794	0.737999	-0.487462	0.250132	0.363057	0.0700528	0.289745	0.0113379	0.200127	0.734991	-0.235206	0.243001	0.0733117	0.683737
P12830	Cadherin-1	0.386904	0.054519	-0.152436	0.558197	-0.53934	0.157807	0.171168	0.336786	-0.101008	0.615086	0.505625	0.260826	-0.0333069	0.952993	0.272176	0.249798
Q15424	Scaffold attachment factor B1	0.380162	0.0546881	-0.184781	0.118748	-0.564943	0.0352596	0.154185	0.316663	0.482973	0.000266306	-0.105749	0.108623	-0.728896	0.0188281	-0.328788	0.0481972
P08319	All-trans-retinol dehydrogenase [NAD(+)] ADH4	-0.632565	0.0547052	-0.052585	#DIV/0!	0.57998	#DIV/0!	-0.516569	0.112545	-0.307131	0.502863	0.18273	0.0652501	-0.253619	#DIV/0!	-0.209438	0.612949
Q9BQG0	Myb-binding protein 1A	0.48047	0.0547859	-0.109019	0.614362	-0.589489	0.0432387	0.244675	0.221408	0.546934	0.00342812	-0.197897	0.179976	-0.605428	0.0230846	-0.30226	0.14577
P22105	Tenascin-X	-0.847702	0.054898	-0.201582	0.613639	0.646119	0.397276	-0.589254	0.0659521	-0.980052	0.00639583	0.174156	0.341825	0.912234	0.00679855	0.390799	0.301094
Q9NYV4	Cyclin-dependent kinase 12	0.230313	0.0552713	0.107008	0.828767	-0.123305	0.846069	0.180991	0.358013	0.163019	0.263567	0.0786194	0.804797	-0.124205	0.745065	0.0179723	0.930893
O43765	Small glutamine-rich tetratricopeptide repeat-containing protein alpha	-0.447647	0.0556733	-0.175555	0.452632	0.272092	0.205249	-0.33881	0.124186	-0.349972	0.120089	-0.0252709	0.976938	0.244016	0.176746	0.0111614	0.934419
Q9Y520	Protein PRRC2C	0.348864	0.0560102	-0.0536492	0.763765	-0.402513	0.122628	0.187859	0.195246	0.499257	7.46517e-05	-0.184131	0.086637	-0.577312	0.0195616	-0.311398	0.0358464
P43251	Biotinidase	-0.439408	0.0560185	0.27179	0.37377	0.711198	0.098529	-0.154929	0.469932	-0.278115	0.115987	-0.0442145	0.704262	0.58275	0.0419917	0.123186	0.578783
Q8NC51	Plasminogen activator inhibitor 1 RNA-binding protein	0.403303	0.0562671	-0.041217	0.723527	-0.44452	0.0907502	0.225495	0.154087	0.330814	0.0117744	0.0661958	0.855066	-0.355427	0.140313	-0.105319	0.460115
Q96GS4	BLOC-1-related complex subunit 6	-0.143997	0.0573034	0.027905	0.877086	0.171902	0.329422	-0.0752361	0.419697	-0.108853	0.255731	0.0527171	0.6625	0.13939	0.450757	0.0336172	0.729209
O95445	Apolipoprotein M	-0.682166	0.0574208	0.549639	0.134476	1.2318	0.026606	-0.189444	0.556079	-0.512991	0.0670073	-0.0625814	0.820435	1.29672	0.0367261	0.323547	0.359756
P22532	Small proline-rich protein 2D	0.57734	0.0575765	-0.00954693	0.972873	-0.586887	0.0216997	0.342585	0.241215	-0.0691069	0.850309	0.324121	0.355846	0.44002	0.502053	0.411692	0.178259
Q9NUQ9	CYFIP-related Rac1 interactor B	0.295705	0.0576966	-0.209424	0.301131	-0.505129	0.0417627	0.0936533	0.563575	0.733087	0.000176216	-0.250186	0.0307807	-1.16225	0.000286292	-0.639434	0.000716948
Q14126	Desmoglein-2	-0.309152	0.0577913	-0.163039	0.260408	0.146113	0.244768	-0.250707	0.0537108	-0.103155	0.655835	-0.0928184	0.723533	-0.252596	0.532294	-0.147552	0.515489
Q9BQ61	Telomerase RNA component interacting RNase	0.432642	0.0579646	0.145475	0.579469	-0.287166	0.247126	0.317775	0.14671	0.493644	0.0281263	0.0602775	0.343906	-0.474139	0.214101	-0.175868	0.209803
Q6PGP7	Tetratricopeptide repeat protein 37	0.223438	0.058062	-0.00949656	#DIV/0!	-0.232934	#DIV/0!	0.176851	0.10805	0.0879187	0.30192	0.127777	0.727774	-0.0896732	#DIV/0!	0.0889321	0.345649
P62316	Small nuclear ribonucleoprotein Sm D2	0.259397	0.0582071	-0.140607	0.345407	-0.400005	0.0314222	0.0993955	0.462185	0.437483	0.00116658	-0.176113	0.0361323	-0.626057	0.0379358	-0.338088	0.00452402
P62277	40S ribosomal protein S13	0.47854	0.0582627	0.0371579	0.834508	-0.441382	0.112042	0.301987	0.153383	0.603108	0.00828808	-0.0355871	0.455598	-0.67421	0.0821579	-0.301121	0.100764
Q93062	RNA-binding protein with multiple splicing	-0.774305	0.0586152	-0.364138	0.366441	0.410168	0.210853	-0.528205	0.165983	-0.273881	0.446716	-0.384652	0.405915	-0.17628	0.99826	-0.254324	0.294533
Q9NQC3	Reticulon-4	0.269207	0.0588523	-0.135277	0.40923	-0.404484	0.0196733	0.107413	0.440048	0.0611278	0.612575	0.204729	0.0408311	-0.255909	0.0817628	0.0462856	0.690004
P32519	ETS-related transcription factor Elf-1	-0.211185	0.0588703	-0.0974214	0.429563	0.113764	0.198477	-0.16568	0.115458	0.0119631	0.912223	-0.131299	0.165923	-0.16011	0.066521	-0.177643	0.0338373
P53701	Holocytochrome c-type synthase	0.361195	0.0589907	-0.0836816	#DIV/0!	-0.444877	#DIV/0!	0.27222	0.116321	0.47866	0.00114282	-0.168082	0.789937	-0.511724	#DIV/0!	-0.20644	0.220572
Q8NBK3	Formylglycine-generating enzyme	-0.208409	0.0590813	0.107796	0.560502	0.316205	0.162961	-0.0186862	0.895202	-0.0497737	0.636116	-0.0961385	0.0560195	0.14366	0.425046	0.0310875	0.815259
O43795	Unconventional myosin-Ib	0.630173	0.0591509	-0.0780691	0.779749	-0.708242	0.124742	0.346876	0.188211	1.00407	0.00380089	-0.229874	0.33089	-1.5069	0.000432049	-0.657196	0.0561637
P55884	Eukaryotic translation initiation factor 3 subunit B	0.224726	0.0592931	-0.0441799	0.808251	-0.268906	0.158518	0.117163	0.327568	0.260004	0.0290783	-0.0138024	0.956363	-0.288292	0.205266	-0.142841	0.209779
Q96PD5	N-acetylmuramoyl-L-alanine amidase	-0.602978	0.0593374	0.654687	0.0254426	1.25767	0.0102572	-0.099912	0.737439	-0.505796	0.0685294	0.165306	0.507903	1.2141	0.00684689	0.405884	0.243465
P26640	Valine--tRNA ligase	0.261735	0.0594152	-0.151504	0.396437	-0.413239	0.0764704	0.0964392	0.45508	0.342716	0.00327533	-0.044627	0.734008	-0.570333	0.00509434	-0.246277	0.0694658
P60228	Eukaryotic translation initiation factor 3 subunit E	0.323867	0.0595449	-0.129285	0.429674	-0.453152	0.0542619	0.142606	0.312648	0.395606	0.00219908	-0.0601864	0.68536	-0.557782	0.00309464	-0.253	0.0959255
Q96DI7	U5 small nuclear ribonucleoprotein 40 kDa protein	0.390516	0.0595713	-0.174342	0.328906	-0.564858	0.0610203	0.164573	0.325342	0.451907	0.00113673	-0.037195	0.431411	-0.733232	0.0190157	-0.287334	0.0984502
P54252	Ataxin-3	-0.236298	0.0597013	-0.113672	0.607436	0.122627	0.45389	-0.187248	0.144468	-0.140567	0.254029	0.0033178	0.700367	-0.0270182	0.792724	-0.0466808	0.678808
P62829	60S ribosomal protein L23	0.404334	0.0597263	0.0415156	0.837478	-0.362818	0.144183	0.259207	0.173964	0.41632	0.0313835	0.0593067	0.772717	-0.392824	0.31664	-0.157114	0.295192
Q05048	Cleavage stimulation factor subunit 1	0.252705	0.0597796	-0.0893547	0.505097	-0.34206	0.0797981	0.115881	0.324568	0.330679	0.00216163	-0.0365331	0.347252	-0.512812	0.0245756	-0.214798	0.0540841
Q629K1	Triple QxxK/R motif-containing protein	-0.329833	0.0600517	-0.195953	0.602219	0.133879	0.669757	-0.276281	0.167732	-0.469249	0.0393776	0.182207	0.628949	0.130332	0.675814	0.192968	0.337797
O75821	Eukaryotic translation initiation factor 3 subunit G	0.226003	0.0600722	-0.0733201	0.446766	-0.299323	0.0461457	0.106274	0.299593	0.268643	0.0148301	-0.0734914	0.345253	-0.268212	0.243607	-0.162369	0.133726
P08708	40S ribosomal protein S17	0.507357	0.0601141	0.0538255	0.821837	-0.453531	0.164868	0.325944	0.160999	0.63739	0.00655435	-0.0415251	0.432972	-0.707646	0.048167	-0.311446	0.0892263
P29353	SHC-transforming protein 1	0.405015	0.0601436	-0.149506	0.634693	-0.554521	0.160403	0.183206	0.367609	0.542286	0.00224516	-0.00867226	0.805321	-0.945655	0.030228	-0.359079	0.0780045
Q14444	Caprin-1	0.287114	0.0607576	-0.0382578	0.586965	-0.325371	0.101672	0.156965	0.147434	0.423426	0.00162407	-0.257084	0.172726	-0.363516	0.0375972	-0.266461	0.0543375
P50135	Histamine N-methyltransferase	-0.36096	0.0607653	0.236431	0.562892	0.59739	0.167427	-0.122004	0.566228	-0.0827936	0.677302	-0.0243455	0.670628	0.176851	0.407432	-0.03921	0.875246
P08473	Neprilysin	-0.498926	0.06127	0.335289	0.314342	0.834214	0.0682968	-0.16524	0.510827	0.00366486	0.983815	-0.530315	0.0777597	0.38304	0.0936143	-0.168905	0.467269
Q6NYC8	Phostensin	0.388817	0.0615112	-0.122991	0.49793	-0.511808	0.0682563	0.184094	0.287985	0.664805	0.000554393	-0.314584	0.00753723	-0.757492	0.00156582	-0.480711	0.0145918
Q09161	Nuclear cap-binding protein subunit 1	0.431638	0.0616633	-0.58836	#DIV/0!	-1.02	#DIV/0!	0.227638	0.421721	0.847981	0.00117817	-0.356834	0.573314	-1.49585	#DIV/0!	-0.620343	0.0582886
Q15149	Plectin	0.310897	0.0616885	0.0172179	0.924498	-0.293679	0.263991	0.193425	0.162169	0.206441	0.146869	-0.024596	0.544912	-0.157928	0.593627	-0.0130161	0.929598
P04216	Thy-1 membrane glycoprotein	0.770032	0.0617535	-1.46604	#DIV/0!	-2.23607	#DIV/0!	0.322818	0.56769	0.0473327	0.896596	0.845186	0.6352	-1.63586	#DIV/0!	0.275486	0.649054
P09936	Ubiquitin carboxyl-terminal hydrolase isozyme L1	-0.474606	0.0623613	0.273105	0.301998	0.74771	0.0432993	-0.175521	0.455173	-0.463831	0.0262489	-0.0144412	0.535543	0.844769	0.00488019	0.28831	0.190285
Q9Y2S2	Lambda-crystallin homolog	-0.328577	0.0625933	0.0386393	0.914863	0.367216	0.435715	-0.181691	0.333496	-0.0125527	0.929719	-0.178306	0.460558	-0.0138039	0.955406	-0.169138	0.350632
P02786	Transferrin receptor protein 1	0.316864	0.0626478	0.0826926	0.27846	-0.234171	0.232114	0.223195	0.042929	0.861626	0.00205248	-0.493361	0.0616801	-0.997364	0.0590473	-0.63843	0.0134817
P40199	Carcinoembryonic antigen-related cell adhesion molecule 6	-0.584812	0.0629949	0.241486	0.674181	0.826299	0.192002	-0.254293	0.476165	0.192981	0.565629	-0.629651	0.124699	-0.244661	0.492662	-0.447274	0.158755
P54652	Heat shock-related 70 kDa protein 2	0.275827	0.063453	-0.11847	0.649943	-0.394296	0.183038	0.118108	0.475685	-0.0697119	0.713927	-0.0113616	0.750556	0.297688	0.388586	0.18782	0.309083
P69905	Hemoglobin subunit alpha	-1.05838	0.0634575	0.0384901	0.95503	1.09687	0.24664	-0.619632	0.196778	-0.425466	0.3479	0.0603387	0.460969	-0.308896	0.739598	-0.194165	0.704833
P29375	Lysine-specific demethylase 5A	-0.262739	0.0635303	-0.132569	0.649119	0.13017	0.655287	-0.184637	0.280258	0.229702	0.0414883	-0.345785	0.18696	-0.535229	0.297686	-0.414339	0.0388536
Q12788	Transducin beta-like protein 3	0.37882	0.0637628	0.149491	0.351932	-0.229329	0.141718	0.287088	0.0477158	0.357171	0.0035392	-0.0530233	0.708228	-0.0926395	0.0266843	-0.070083	0.592488
O15371	Eukaryotic translation initiation factor 3 subunit D	0.391265	0.0641945	-0.183649	0.231273	-0.574913	0.0271001	0.161299	0.370947	0.497428	0.00467793	-0.0538312	0.688919	-0.805361	0.00197559	-0.336128	0.0613227
Q9UKX7	Nuclear pore complex protein Nup50	0.299631	0.0643231	0.100947	0.523203	-0.198684	0.31209	0.220157	0.126978	0.610122	0.000278343	-0.252869	0.00304712	-0.557145	0.0154183	-0.389964	0.00100994
P62701	40S ribosomal protein S4, X isoform	0.46096	0.0647537	0.0482572	0.808838	-0.412703	0.127493	0.295879	0.163469	0.570624	0.00933187	-0.067703	0.327111	-0.619857	0.0671803	-0.274745	0.106902
Q9H4B7	Tubulin beta-1 chain	-0.597823	0.0654382	0.0548823	0.924433	0.652705	0.29665	-0.336741	0.345079	-0.340722	0.323896	-0.149853	0.714667	0.278412	0.75275	0.0039816	0.989394
O00148	ATP-dependent RNA helicase DDX39A	0.435056	0.06572	-0.194177	0.338955	-0.629232	0.0587974	0.183363	0.340057	0.536188	0.00239289	-0.196716	0.221668	-0.717477	0.0170325	-0.352825	0.0872079
P49005	DNA polymerase delta subunit 2	0.168519	0.06583	-0.0157525	0.834807	-0.184272	0.00940746	0.0579561	0.503778	0.0403652	0.680331	0.124897	0.642972	-0.0795777	0.131715	0.0175909	0.834939
P43304	Glycerol-3-phosphate dehydrogenase, mitochondrial	0.329621	0.0658339	0.166698	0.624396	-0.162923	0.74818	0.264452	0.110813	0.507431	0.00170925	-0.164476	0.0195765	-0.507439	0.16059	-0.242978	0.19232
Q99487	Platelet-activating factor acetylhydrolase 2, cytoplasmic	0.240336	0.0659185	-0.0464488	0.904313	-0.286785	0.442224	0.125622	0.48129	0.3169	0.0315792	-0.0475852	0.881376	-0.425539	0.395824	-0.191278	0.257994
Q969E4	Transcription elongation factor A protein-like 3	-0.241033	0.0660707	0.00690383	0.972375	0.247937	0.277547	-0.141858	0.30302	-0.204781	0.152961	0.0155491	0.724258	0.204664	0.0986209	0.0629228	0.58105
Q9UHQ9	NADH-cytochrome b5 reductase 1	0.574144	0.0662335	0.323946	0.573464	-0.250198	0.559567	0.474064	0.139198	0.34177	0.255394	0.0763477	0.341113	-0.153826	0.766236	0.132294	0.6425
Q9NVU7	Protein SDA1 homolog	0.53782	0.0662637	-0.0845021	#DIV/0!	-0.622322	#DIV/0!	0.413355	0.156862	0.973547	0.00333175	-0.559126	0.0747126	-0.93465	#DIV/0!	-0.560191	0.0329459
P49593	Protein phosphatase 1F	-0.285431	0.0668995	0.0101052	0.94375	0.295536	0.0940541	-0.167217	0.23565	-0.235922	0.155406	0.166692	0.0655526	0.17462	0.120967	0.0687057	0.625501
P02760	Protein AMBP	-0.603438	0.0669568	0.411363	0.161118	1.0148	0.0102337	-0.197517	0.478827	-0.953645	0.00301563	0.596373	0.0265151	1.49751	0.000101904	0.756127	0.0335121
Q9UBN7	Histone deacetylase 6	-0.341613	0.0670799	0.0526099	0.788072	0.394223	0.0412324	-0.183924	0.314168	-0.0992936	0.5623	-0.244417	0.306494	0.0757663	0.389563	-0.0846302	0.467584
Q9GZM7	Tubulointerstitial nephritis antigen-like	-0.544666	0.0671863	-0.136412	0.629347	0.408254	0.381549	-0.381365	0.106199	-0.704525	0.0267664	0.438149	0.0378126	0.552287	0.0849109	0.323161	0.285062
P02763	Alpha-1-acid glycoprotein 1	-0.601535	0.0673653	0.325785	0.340463	0.92732	0.0274477	-0.230607	0.469559	-0.378947	0.247318	0.162051	0.563854	0.461516	0.403255	0.14834	0.622651
Q5T2T1	MAGUK p55 subfamily member 7	0.394718	0.0679635	-0.0256803	0.865239	-0.420398	0.160529	0.226559	0.136575	0.0899421	0.38653	0.201718	0.509687	0.00759562	0.973998	0.136617	0.377917
Q8WXH0	Nesprin-2	0.287795	0.0682044	-0.0565956	0.636802	-0.344391	0.105679	0.150039	0.191549	0.247759	0.00868243	-0.0987625	0.34479	-0.222337	0.148123	-0.09772	0.424241
P17677	Neuromodulin	-0.774376	0.0683945	0.178068	0.718507	0.952444	0.110625	-0.202909	0.6417	-0.994503	0.0599669	-0.220068	0.238277	1.91196	0.222553	0.791594	0.135537
O60313	Dynamin-like 120 kDa protein, mitochondrial	0.392839	0.0684535	-0.0843962	0.704622	-0.477235	0.0938997	0.201945	0.283562	0.521277	0.0154675	-0.17681	0.251625	-0.860257	0.00778487	-0.319332	0.12647
O76003	Glutaredoxin-3	0.231242	0.0684854	-0.16901	0.0941584	-0.400252	0.0216615	0.0711414	0.524992	0.36093	0.000462933	-0.136069	0.310492	-0.510746	0.0439479	-0.289788	0.0132375
P82663	28S ribosomal protein S25, mitochondrial	-0.417554	0.0685737	0.0107126	0.954191	0.428267	0.162455	-0.246248	0.176333	-0.442885	0.00604174	0.0111049	0.134799	0.499903	0.0574141	0.196637	0.214132
P01591	Immunoglobulin J chain	-0.930076	0.068735	0.634134	0.151094	1.56421	0.00474811	-0.304392	0.526174	-0.23569	0.641619	-0.201336	0.444937	0.801939	0.156273	-0.0687024	0.891184
Q70UQ0	Inhibitor of nuclear factor kappa-B kinase-interacting protein	0.281408	0.069355	0.159016	0.527342	-0.122392	0.521321	0.232452	0.115196	0.61942	0.00821932	-0.336244	0.359959	-0.602091	0.0322412	-0.386969	0.0747642
Q13188	Serine/threonine-protein kinase 3	0.372951	0.0701277	-0.410029	#DIV/0!	-0.78298	#DIV/0!	0.216355	0.343425	0.570874	0.0190597	-0.0874683	0.886887	-1.09136	#DIV/0!	-0.354519	0.183973
P0C0L5	Complement C4-B	-0.309325	0.0702777	0.642314	0.00014373	0.951639	0.000729657	0.0713307	0.726708	-0.100684	0.629265	-0.13742	0.800516	0.697361	0.103944	0.172014	0.491764
O15379	Histone deacetylase 3	0.265197	0.0703691	-0.111912	#DIV/0!	-0.377109	#DIV/0!	0.189775	0.214873	0.387289	0.0121573	-0.0660926	0.737541	-0.5552	#DIV/0!	-0.197514	0.100195
P21964	Catechol O-methyltransferase	0.366764	0.0704784	-0.150139	0.373516	-0.516903	0.022962	0.160003	0.382136	0.219765	0.228647	0.076909	0.926271	-0.28066	0.287695	-0.0597628	0.720644
Q9H1E1	Ribonuclease 7	0.475314	0.0708805	0.193035	0.53263	-0.282279	0.3155	0.305947	0.237	0.0946304	0.723415	0.526056	0.172799	0.0129596	0.00898284	0.211316	0.357508
Q96CP2	FLYWCH family member 2	-0.23245	0.0708806	-0.233788	0.0330071	-0.00133817	0.905741	-0.232985	0.0348347	-0.0863293	0.462059	-0.0727665	0.699941	-0.20847	0.212256	-0.146656	0.113932
Q9Y3U8	60S ribosomal protein L36	0.425578	0.0710708	0.202883	0.557726	-0.222695	0.483798	0.3365	0.108293	0.43573	0.022833	0.0786584	0.519295	-0.393403	0.453612	-0.0992296	0.601651
Q16706	Alpha-mannosidase 2	0.319022	0.0714769	0.227083	0.313352	-0.0919385	0.593795	0.282246	0.0556195	0.7879	0.000125676	-0.433873	0.12187	-0.706848	0.00307918	-0.505654	0.00625827
Q5QJE6	Deoxynucleotidyltransferase terminal-interacting protein 2	0.466048	0.0715954	-0.283091	#DIV/0!	-0.749139	#DIV/0!	0.31622	0.21734	0.721765	0.00906008	-0.364723	0.686043	-0.895851	#DIV/0!	-0.405545	0.15725
O00506	Serine/threonine-protein kinase 25	0.245201	0.0717882	0.0208245	0.901822	-0.224377	0.241976	0.155451	0.185768	0.283637	0.00346429	-0.000827046	0.903725	-0.321584	0.0656547	-0.128187	0.182863
P0DOX2	Immunoglobulin alpha-2 heavy chain	-1.48961	0.0718409	0.459352	0.697964	1.94896	0.161081	-0.320234	0.738181	-0.556017	0.552919	-0.430894	0.581448	1.34502	0.197977	0.235784	0.811438
P30536	Translocator protein	0.335662	0.0720175	-0.0214976	0.904395	-0.357159	0.0486167	0.192798	0.273661	0.389068	0.0591517	0.0369183	0.747049	-0.670266	0.0603984	-0.19627	0.222472
Q92506	(3R)-3-hydroxyacyl-CoA dehydrogenase	-0.650307	0.0721259	-0.182548	0.500259	0.467759	0.201517	-0.463203	0.130861	-0.816383	0.0114169	0.393026	0.00303643	0.539106	0.0397006	0.353179	0.114732
O75717	WD repeat and HMG-box DNA-binding protein 1	0.479575	0.0721301	-0.453455	#DIV/0!	-0.93303	#DIV/0!	0.292969	0.301153	0.876268	0.0437646	-0.393222	0.578946	-1.33319	#DIV/0!	-0.583299	0.157382
Q5T013	Putative hydroxypyruvate isomerase	-0.412178	0.0724718	0.380671	0.158362	0.79285	0.0148783	-0.0950383	0.691057	-0.315601	0.16795	0.113457	0.659016	0.664559	0.036149	0.220562	0.32055
Q9H267	Vacuolar protein sorting-associated protein 33B	-0.155655	0.0726663	0.108244	0.0630024	0.263899	0.0258351	-0.0500953	0.487494	-0.00414082	0.940725	-0.071318	0.626185	0.00734133	0.84038	-0.0459545	0.522986
Q9P003	Protein cornichon homolog 4	0.329634	0.0727611	-0.0988567	0.614398	-0.428491	0.0534231	0.158238	0.308206	0.237543	0.0670878	0.0577703	0.467498	-0.44453	0.0722863	-0.0793056	0.594561
Q8IUR0	Trafficking protein particle complex subunit 5	0.253032	0.073262	0.163632	0.365924	-0.0894002	0.555207	0.217272	0.10629	0.309336	0.0249861	0.0529709	0.542632	-0.203683	0.25627	-0.0920634	0.321097
P33991	DNA replication licensing factor MCM4	0.294125	0.0736527	-0.125209	0.413895	-0.419334	0.0699112	0.126391	0.352868	0.349645	0.00726733	-0.1198	0.348162	-0.470261	0.0191796	-0.223254	0.127222
Q00013	55 kDa erythrocyte membrane protein	-0.34442	0.0736718	-0.268567	0.376973	0.0758533	0.732779	-0.314079	0.113693	0.0703816	0.699606	-0.360628	0.0104763	-0.470558	0.216298	-0.384461	0.00562043
Q8TD06	Anterior gradient protein 3	-0.752691	0.0738563	0.0842326	0.879596	0.836924	0.179608	-0.250537	0.584676	-0.39771	0.311525	-0.599435	0.505585	0.935068	0.421025	0.147173	0.695588
Q9BY44	Eukaryotic translation initiation factor 2A	0.235872	0.0738643	-0.115217	0.655011	-0.351088	0.274006	0.0954364	0.50674	0.224425	0.162196	0.118631	0.597999	-0.625721	0.157107	-0.128989	0.454057
P43235	Cathepsin K	0.756205	0.0743775	-0.470312	#DIV/0!	-1.22652	#DIV/0!	0.510902	0.22025	1.50166	0.0253083	-0.663172	0.331258	-2.05425	#DIV/0!	-0.990754	0.104206
Q6P996	Pyridoxal-dependent decarboxylase domain-containing protein 1	-1.03212	0.0744691	-0.123917	0.896085	0.908205	0.357497	-0.487199	0.470233	-0.536368	0.366746	-0.87954	0.50621	0.68274	0.60923	0.0491691	0.936477
P01031	Complement C5	-0.316962	0.0745269	0.542665	0.000794607	0.859627	0.00273841	0.0268888	0.888963	-0.123634	0.421082	-0.100057	0.631794	0.648774	0.0416737	0.150523	0.451845
P31939	Bifunctional purine biosynthesis protein ATIC	0.238774	0.0748715	-0.000470846	0.99833	-0.239245	0.302705	0.143076	0.262542	0.342459	0.00354408	0.0243892	0.715562	-0.489972	0.0722429	-0.199383	0.123748
Q9UHB6	LIM domain and actin-binding protein 1	0.447511	0.0749827	-0.149676	0.556071	-0.597188	0.121875	0.208636	0.295734	0.708041	0.000811475	-0.39039	0.0427737	-0.838818	0.00471645	-0.499404	0.0373428
Q7L2H7	Eukaryotic translation initiation factor 3 subunit M	0.211959	0.075162	0.0292387	0.839955	-0.18272	0.214003	0.138871	0.207198	0.360537	0.00273868	-0.20342	0.141412	-0.211493	0.1195	-0.221667	0.0255977
Q9BWU0	Kanadaptin	0.207824	0.0756267	-0.0200676	0.914594	-0.227892	0.295734	0.116668	0.287667	0.202368	0.0699498	-0.0468668	0.638777	-0.280748	0.30945	-0.0857005	0.484359
Q8NFC6	Biorientation of chromosomes in cell division protein 1-like 1	-0.166365	0.075673	-0.131353	0.113661	0.0350116	0.453162	-0.15236	0.0636108	-0.0573012	0.594278	-0.0409419	0.462545	0.0115799	0.640984	-0.0950587	0.30175
Q9Y376	Calcium-binding protein 39	0.24963	0.0760684	0.0672407	0.664639	-0.182389	0.164055	0.176674	0.1068	0.367592	0.000148406	-0.109861	0.743923	-0.329332	0.018115	-0.190918	0.0682864
P01903	HLA class II histocompatibility antigen, DR alpha chain	0.451284	0.0762585	-0.206505	0.533088	-0.657789	0.0829173	0.188168	0.465127	0.765315	0.00324143	-0.297414	0.376799	-1.00302	0.0573248	-0.577147	0.00948989
Q9BVP2	Guanine nucleotide-binding protein-like 3	0.327785	0.0764617	0.0970865	0.688855	-0.230699	0.322614	0.235506	0.140966	0.484652	0.00200603	-0.301221	0.0427907	-0.24938	0.328863	-0.249146	0.0993949
Q14694	Ubiquitin carboxyl-terminal hydrolase 10	0.165157	0.0768357	0.0813504	0.560426	-0.0838063	0.523001	0.131634	0.13007	0.379739	0.00115694	-0.147712	0.210171	-0.41963	0.200002	-0.248105	0.0190661
P62847	40S ribosomal protein S24	0.47557	0.0768803	-0.100264	0.572451	-0.575833	0.0528303	0.245236	0.27999	0.603777	0.0089363	-0.112711	0.525055	-0.795935	0.0563997	-0.358541	0.066667
Q96BW5	Phosphotriesterase-related protein	-0.296974	0.0769503	0.172486	0.298036	0.46946	0.0184572	-0.10919	0.494141	0.0245427	0.901893	-0.076121	0.648898	0.00831965	0.956431	-0.133732	0.490472
Q8NC44	Reticulophagy regulator 2	-0.368414	0.0771958	-0.214725	#DIV/0!	0.153689	#DIV/0!	-0.337677	0.0981292	-0.435679	0.0977143	0.161232	0.711141	0.126986	#DIV/0!	0.0980023	0.598826
Q9H4L5	Oxysterol-binding protein-related protein 3	-0.582061	0.0773196	-0.154637	0.771124	0.427425	0.420821	-0.325606	0.385934	0.333515	0.331033	-0.963657	0.379241	-0.362704	0.127098	-0.659122	0.0808279
Q8NBJ4	Golgi membrane protein 1	-1.79265	0.0773898	0.134016	0.931539	1.92666	0.259191	-0.63665	0.586917	-1.45954	0.133214	-0.592634	0.52807	1.74821	0.50051	0.822893	0.395863
Q16787	Laminin subunit alpha-3	-0.486095	0.0776035	-0.319409	0.195413	0.166685	0.528878	-0.419421	0.0658038	-0.331061	0.155408	-0.211325	0.323802	0.114642	0.308807	-0.0883592	0.637413
Q9H2K8	Serine/threonine-protein kinase TAO3	0.47442	0.0781196	0.0152404	0.961364	-0.459179	0.325165	0.290748	0.21401	0.508285	0.0126117	-0.0691069	0.0114837	-0.489341	0.103102	-0.217537	0.25956
Q14254	Flotillin-2	0.277723	0.0785662	-0.00418962	0.963056	-0.281913	0.166432	0.164958	0.144537	0.570466	0.00127802	-0.364341	0.0147651	-0.66322	0.0497531	-0.405508	0.0172358
P08243	Asparagine synthetase [glutamine-hydrolyzing]	0.573403	0.0785978	-0.121694	0.840286	-0.695097	0.287214	0.295364	0.360986	0.763291	0.00589547	0.0182982	0.775226	-0.963247	0.115769	-0.467926	0.165076
A0A0C4DH25	Immunoglobulin kappa variable 3D-20	-0.650238	0.0787057	0.9959	0.00623184	1.64614	0.00595416	0.0082169	0.982026	-0.409938	0.123414	0.190331	0.543749	1.12547	0.0526612	0.418155	0.290402
Q13228	Methanethiol oxidase	-0.634205	0.0788881	0.470995	0.130167	1.1052	0.0336004	-0.192125	0.527805	-0.547324	0.0420915	0.0665505	0.484224	0.986038	0.0119812	0.355199	0.284375
P15880	40S ribosomal protein S2	0.346983	0.0789284	-0.0799455	0.629415	-0.426929	0.0354191	0.176212	0.330972	0.424719	0.0231854	-0.00334041	0.945874	-0.598023	0.0840184	-0.248507	0.0766087
P00915	Carbonic anhydrase 1	-0.861382	0.0790979	0.566621	0.47263	1.428	0.13381	-0.29018	0.545839	-0.17983	0.662476	-0.0692443	0.809404	0.175374	0.842819	-0.110351	0.830504
O75312	Zinc finger protein ZPR1	-0.386523	0.0791328	0.0368036	0.855706	0.423326	0.0180735	-0.217192	0.3063	-0.0497472	0.804043	-0.279144	0.146244	0.107521	0.531006	-0.167445	0.158698
Q9NVX2	Notchless protein homolog 1	0.322715	0.0792157	-0.0463533	#DIV/0!	-0.369068	#DIV/0!	0.248901	0.17374	0.697322	0.0314131	-0.370817	0.391289	-0.747467	#DIV/0!	-0.448421	0.113585
P12111	Collagen alpha-3(VI) chain	-0.459568	0.0795268	0.397416	0.110209	0.856984	0.00469441	-0.116774	0.660027	-0.782365	0.00433513	0.322769	0.299683	1.33573	0.00912236	0.665591	0.0062808
P23396	40S ribosomal protein S3	0.379265	0.0798828	0.03979	0.824258	-0.339475	0.123045	0.243475	0.204862	0.471137	0.0216757	-0.0137618	0.545034	-0.472798	0.197629	-0.227662	0.118667
Q8N283	Ankyrin repeat domain-containing protein 35	-0.27108	0.0799371	-0.087233	#DIV/0!	0.183847	#DIV/0!	-0.234311	0.123687	-0.631603	0.0243394	0.421338	0.288394	0.483554	#DIV/0!	0.397292	0.100431
Q8IY81	pre-rRNA 2'-O-ribose RNA methyltransferase FTSJ3	0.832372	0.0801014	-0.528611	#DIV/0!	-1.36098	#DIV/0!	0.560175	0.251012	1.27574	0.00979967	-0.703609	0.0869711	-1.54411	#DIV/0!	-0.715566	0.154515
Q86SF2	N-acetylgalactosaminyltransferase 7	-1.1732	0.0802589	-0.148262	0.893189	1.02493	0.368972	-0.558236	0.475194	-0.620193	0.360724	-0.818975	0.571098	0.570817	0.751884	0.0619578	0.929343
O96011	Peroxisomal membrane protein 11B	0.374501	0.0803518	-0.517062	#DIV/0!	-0.891563	#DIV/0!	0.196189	0.45817	0.67351	0.0102996	-0.210563	0.217879	-1.27902	#DIV/0!	-0.477321	0.0826251
P02042	Hemoglobin subunit delta	-0.982548	0.0808214	0.346995	0.692804	1.32954	0.237592	-0.450731	0.396006	-0.494478	0.235709	-0.00540433	0.640186	0.349567	0.699781	0.0437478	0.932528
Q14409	Glycerol kinase 3	0.365385	0.0811502	-0.026104	#DIV/0!	-0.391489	#DIV/0!	0.287087	0.118982	0.437585	0.0288435	-0.161148	0.316806	-0.374741	#DIV/0!	-0.150498	0.444443
Q96S44	EKC/KEOPS complex subunit TP53RK	0.300526	0.0811823	0.204985	0.178811	-0.0955411	0.745315	0.26231	0.0732323	0.34866	0.0431247	0.131735	0.571247	-0.280059	0.243501	-0.0863501	0.521637
Q96BY7	Autophagy-related protein 2 homolog B	-0.19216	0.081308	-0.118706	#DIV/0!	0.0734542	#DIV/0!	-0.177469	0.0676852	0.0208528	0.883767	-0.0707155	0.850717	-0.281856	#DIV/0!	-0.198322	0.198208
Q15654	Thyroid receptor-interacting protein 6	0.268784	0.0813584	-0.0708062	0.814609	-0.339591	0.447246	0.132948	0.377185	0.137305	0.0775899	0.130746	0.730216	-0.173285	0.517267	-0.00435693	0.975992
Q14008	Cytoskeleton-associated protein 5	0.632456	0.0814926	-0.482789	0.226763	-1.11525	0.0326208	0.186358	0.581111	0.952635	0.0049096	-0.365508	0.0155608	-1.58775	0.0348723	-0.766277	0.0362055
Q14624	Inter-alpha-trypsin inhibitor heavy chain H4	-0.369852	0.081782	0.738605	0.0148631	1.10846	0.00476361	0.0735309	0.759538	-0.1967	0.308998	-0.0178551	0.615478	0.965211	0.0765399	0.270231	0.324396
Q6NXG1	Epithelial splicing regulatory protein 1	0.453288	0.0818216	-0.274659	0.362309	-0.727947	0.0925581	0.162109	0.481245	0.299145	0.0880614	0.127714	0.914818	-0.562307	0.253038	-0.137036	0.534727
P61513	60S ribosomal protein L37a	0.398632	0.081897	0.00249528	0.98853	-0.396137	0.139127	0.240177	0.202954	0.582273	0.00439513	-0.130133	0.371552	-0.633431	0.18298	-0.342095	0.0518172
O75363	Breast carcinoma-amplified sequence 1	-0.774461	0.0823288	0.321835	0.719957	1.0963	0.276255	-0.116684	0.849182	-0.448021	0.289499	-0.446359	0.50814	0.886921	0.509716	0.331338	0.553688
Q5VTL8	Pre-mRNA-splicing factor 38B	0.597948	0.0825413	-0.20872	#DIV/0!	-0.806668	#DIV/0!	0.436614	0.216993	1.05158	0.00693355	-0.383096	0.16946	-1.33084	#DIV/0!	-0.614966	0.0395349
P31151	Protein S100-A7	1.12596	0.0825975	-0.5521	0.275837	-1.67806	0.00391455	0.454737	0.425213	0.640718	0.2444	0.845396	0.0477626	-1.30679	0.163966	-0.18598	0.726264
O43592	Exportin-T	0.211739	0.082731	0.152653	#DIV/0!	-0.0590857	#DIV/0!	0.199921	0.0688915	0.144871	0.205928	0.0332392	0.771316	0.0414111	#DIV/0!	0.0550508	0.565313
Q96EK6	Glucosamine 6-phosphate N-acetyltransferase	0.277085	0.0827892	0.0871353	0.689376	-0.18995	0.365272	0.163115	0.331055	-0.292967	0.133791	0.435809	0.38742	0.582575	0.195349	0.456082	0.0224601
Q5JTZ9	Alanine--tRNA ligase, mitochondrial	0.180905	0.0828077	0.110436	0.37602	-0.0704688	0.579996	0.152718	0.0915619	0.0848577	0.415992	0.196406	0.129446	-0.139223	0.453924	0.06786	0.481595
P18077	60S ribosomal protein L35a	0.510438	0.0830586	-0.160621	0.579786	-0.671058	0.0118735	0.242014	0.403208	0.642418	0.0321281	-0.0202908	0.930476	-0.987688	0.0595765	-0.400404	0.0480438
P78346	Ribonuclease P protein subunit p30	0.675079	0.0837885	-0.420259	#DIV/0!	-1.09534	#DIV/0!	0.456011	0.274326	1.06564	0.0109855	-0.478181	0.205482	-1.39828	#DIV/0!	-0.609627	0.0780969
O76031	ATP-dependent Clp protease ATP-binding subunit clpX-like, mitochondrial	0.340095	0.0838402	-0.0449762	0.806007	-0.385071	0.142319	0.186066	0.238596	0.505546	0.00419263	-0.165785	0.047466	-0.708154	0.0404924	-0.319479	0.0749435
Q99674	Cell growth regulator with EF hand domain protein 1	-1.48265	0.0838975	0.243798	0.849463	1.72645	0.228243	-0.446781	0.651024	-1.33237	0.126535	-0.551786	0.4992	2.10046	0.450125	0.885591	0.311312
P42677	40S ribosomal protein S27	0.478621	0.0843429	-0.155601	0.424593	-0.634223	0.0848292	0.224932	0.296427	0.499461	0.0244974	0.0575804	0.894824	-0.804678	0.0364348	-0.274529	0.252549
Q9UPN3	Microtubule-actin cross-linking factor 1, isoforms 1/2/3/5	0.323424	0.0844197	-0.0706069	0.724635	-0.394031	0.20028	0.165812	0.26474	0.437974	0.00113235	-0.169967	0.0747461	-0.452972	0.0264604	-0.272163	0.0906355
Q8TAD8	Smad nuclear-interacting protein 1	0.274941	0.0844743	-0.656995	#DIV/0!	-0.931936	#DIV/0!	0.0885537	0.710929	0.33311	0.0531215	-0.134441	0.120568	-0.913832	#DIV/0!	-0.244556	0.299974
Q14157	Ubiquitin-associated protein 2-like	0.227927	0.0845359	-0.117801	0.363987	-0.345728	0.0436063	0.0896353	0.466837	0.36162	0.00417427	-0.112729	0.199296	-0.561421	0.030347	-0.271984	0.0177536
P05090	Apolipoprotein D	-0.439851	0.084719	0.177412	0.419805	0.617263	0.0342667	-0.192946	0.384833	-0.259653	0.315238	0.0338888	0.871155	0.564554	0.0109107	0.0667065	0.793063
P16949	Stathmin	0.387772	0.0850858	-0.217661	0.459469	-0.605433	0.0937568	0.145598	0.522194	0.736145	0.00126879	-0.322727	0.0316651	-1.0217	0.0135806	-0.590546	0.00373067
Q9BRP4	Proteasomal ATPase-associated factor 1	-0.502976	0.0852918	-0.44455	#DIV/0!	0.0584267	#DIV/0!	-0.491291	0.0566637	-0.50593	0.0461487	0.220633	0.321056	-0.156299	#DIV/0!	0.014639	0.941058
P62280	40S ribosomal protein S11	0.414264	0.0855183	0.00477914	0.977051	-0.409485	0.11282	0.25047	0.209635	0.514132	0.0157436	-0.00420394	0.904735	-0.65178	0.103502	-0.263662	0.129508
Q7Z2K6	Endoplasmic reticulum metallopeptidase 1	-0.328979	0.0859657	0.0857121	0.491562	0.414691	0.0129569	-0.163102	0.293985	-0.339256	0.0405815	0.0813738	0.296894	0.351532	0.162985	0.176154	0.267153
O76070	Gamma-synuclein	-0.577508	0.0861046	-0.0932045	0.793776	0.484303	0.446772	-0.383786	0.144998	-0.37231	0.175289	0.122054	0.22764	0.23067	0.34574	-0.0114762	0.969284
P49795	Regulator of G-protein signaling 19	0.29662	0.0863611	0.0404317	0.865677	-0.256188	0.312727	0.194144	0.2249	0.450336	0.0172267	-0.0214503	0.949652	-0.504755	0.0145987	-0.256191	0.145666
P67809	Y-box-binding protein 1	0.253153	0.0867517	-0.0925641	0.568369	-0.345717	0.0994467	0.114866	0.397816	0.380527	0.0183974	-0.0412588	0.593884	-0.59655	0.134359	-0.265661	0.0816569
Q7KZI7	Serine/threonine-protein kinase MARK2	0.243259	0.0869349	-0.0733628	0.6378	-0.316622	0.0926633	0.116611	0.36273	0.216763	0.0863909	0.148826	0.093628	-0.422882	0.146331	-0.100152	0.409267
Q15121	Astrocytic phosphoprotein PEA-15	-0.327817	0.0870103	0.0120427	0.953626	0.33986	0.218378	-0.191873	0.242881	-0.125926	0.473823	-0.0306086	0.988071	0.126765	0.253627	-0.0659469	0.706524
P46776	60S ribosomal protein L27a	0.359036	0.0870569	0.133936	0.493477	-0.2251	0.373154	0.268996	0.132841	0.538392	0.0076113	-0.174925	0.209791	-0.48039	0.143005	-0.269396	0.091271
P11940	Polyadenylate-binding protein 1	0.345032	0.0871264	-0.241955	0.329683	-0.586987	0.0774212	0.110238	0.534081	0.535961	0.000912239	-0.12877	0.222395	-0.882147	0.0113351	-0.425724	0.0341021
P17980	26S proteasome regulatory subunit 6A	0.174401	0.0875127	-0.000191607	0.9983	-0.174593	0.0840866	0.104564	0.262092	0.339051	0.00170074	-0.19744	0.0339522	-0.319645	0.0394329	-0.234487	0.00266435
O14791	Apolipoprotein L1	-0.602643	0.0875396	0.470241	0.233302	1.07288	0.0582288	-0.173489	0.584022	-0.0446229	0.864591	-0.331479	0.353096	0.541021	0.122214	-0.128867	0.692262
Q8NDI1	EH domain-binding protein 1	0.237483	0.0876592	-0.0326404	0.87111	-0.270124	0.214811	0.129434	0.298297	0.212279	0.0539078	-0.0111293	0.911235	-0.118572	0.512452	-0.0828456	0.512962
P39880	Homeobox protein cut-like 1	0.358376	0.0876812	0.0386496	0.785713	-0.319726	0.320848	0.230485	0.100264	0.266593	0.0362956	0.135603	0.754689	-0.329628	0.0532329	-0.0361073	0.820442
Q9HAV4	Exportin-5	0.398043	0.0877919	-0.184462	0.575916	-0.582505	0.144812	0.165041	0.424024	0.488751	0.00142186	-0.198833	0.291914	-0.630497	0.0319715	-0.32371	0.123133
P49750	YLP motif-containing protein 1	0.221712	0.0878402	-0.118998	0.458356	-0.340709	0.0782935	0.0854282	0.480848	0.311024	0.00315758	-0.0509035	0.79007	-0.490737	0.0109723	-0.225596	0.0416918
Q9GZR1	Sentrin-specific protease 6	0.328187	0.0880484	0.424829	#DIV/0!	0.0966414	#DIV/0!	0.347516	0.0655311	0.356292	0.0604492	-0.079233	0.354723	0.119665	#DIV/0!	-0.00877639	0.928503
P00751	Complement factor B	-0.386652	0.0881435	0.612715	0.0672431	0.999367	0.0108885	0.0130944	0.960595	-0.313937	0.188356	0.0902307	0.810486	0.834494	0.0336131	0.327032	0.204994
Q99714	3-hydroxyacyl-CoA dehydrogenase type-2	0.202382	0.088549	-0.0284573	0.836722	-0.230839	0.0584072	0.110046	0.363643	0.174396	0.195132	0.113835	0.214694	-0.374716	0.112735	-0.0643497	0.489608
Q96II8	DISP complex protein LRCH3	-0.147741	0.0890099	0.234001	0.000573949	0.381742	0.00268949	0.00495602	0.953277	0.102749	0.254	-0.236542	0.103619	0.171293	0.454412	-0.0977935	0.375124
O00154	Cytosolic acyl coenzyme A thioester hydrolase	0.238427	0.0890475	-0.138766	0.277022	-0.377193	0.0464318	0.0875499	0.450359	0.403842	0.00279021	-0.0368585	0.857523	-0.563984	0.079874	-0.316292	0.0301868
P04114	Apolipoprotein B-100	-0.444022	0.0893129	0.197321	0.462265	0.641343	0.102999	-0.187485	0.408016	-0.369075	0.0776349	-0.0725629	0.913565	0.652137	0.0655743	0.18159	0.417579
O00116	Alkyldihydroxyacetonephosphate synthase, peroxisomal	0.340601	0.0895619	-0.121568	0.7348	-0.462169	0.24773	0.155733	0.435141	0.602518	0.0063766	-0.325701	0.0509595	-0.8635	0.0624822	-0.446785	0.0643214
Q15738	Sterol-4-alpha-carboxylate 3-dehydrogenase, decarboxylating	0.203843	0.0896814	-0.120568	0.522831	-0.324411	0.180439	0.0740787	0.533267	0.114251	0.356793	0.221408	0.0224517	-0.383965	0.200281	-0.040172	0.767921
P06493	Cyclin-dependent kinase 1	0.324746	0.0896823	0.0624459	0.803255	-0.2623	0.48757	0.219826	0.156801	0.51605	3.93898e-05	-0.167741	0.298415	-0.48742	0.105019	-0.296225	0.0512649
P02765	Alpha-2-HS-glycoprotein	-0.630575	0.0897403	0.475707	0.170859	1.10628	0.0403804	-0.188062	0.559262	-0.459139	0.11683	0.177202	0.328101	0.87374	0.0482592	0.271077	0.43013
Q9UK41	Vacuolar protein sorting-associated protein 28 homolog	0.209853	0.0897572	-0.181394	0.244296	-0.391247	0.0225134	0.0533541	0.677863	0.0927064	0.408186	0.163077	0.276358	-0.29205	0.0463563	-0.0393523	0.705683
O95832	Claudin-1	0.727225	0.0900038	-0.119577	0.864127	-0.846802	0.338105	0.388504	0.365795	0.111757	0.787555	0.559455	0.101831	-0.523775	0.388021	0.276747	0.514386
P27169	Serum paraoxonase/arylesterase 1	-0.610471	0.0901645	0.697755	0.14288	1.30823	0.0444165	-0.0871804	0.801062	-0.419923	0.117874	-0.0381383	0.575863	1.11283	0.135589	0.332743	0.361335
Q8TCS8	Polyribonucleotide nucleotidyltransferase 1, mitochondrial	0.350547	0.0904073	-0.132455	0.633048	-0.483003	0.139993	0.157346	0.387701	0.347895	0.0409053	-0.113788	0.640626	-0.553347	0.0271801	-0.190548	0.338851
P54108	Cysteine-rich secretory protein 3	-1.40824	0.0908785	0.0803813	0.947893	1.48862	0.26048	-0.515066	0.583957	-1.13206	0.177602	-0.389444	0.54852	1.38073	0.464784	0.616996	0.443379
P83881	60S ribosomal protein L36a	0.533927	0.091059	-0.1435	0.525829	-0.677427	0.105094	0.262956	0.282312	0.476038	0.0383399	0.131949	0.731564	-0.80674	0.113001	-0.213081	0.394628
P27635	60S ribosomal protein L10	0.357306	0.0912336	-0.00883142	0.959289	-0.366138	0.0556731	0.210851	0.270808	0.480251	0.015444	-0.079562	0.506849	-0.5539	0.0409733	-0.2694	0.0344157
P48729	Casein kinase I isoform alpha	0.354006	0.0913812	-0.15627	0.389068	-0.510276	0.0878215	0.149895	0.368759	0.296165	0.0217892	0.0700831	0.765056	-0.492255	0.0367912	-0.146269	0.367373
P12270	Nucleoprotein TPR	0.309517	0.0915115	0.00530445	0.980029	-0.304213	0.321568	0.187832	0.189464	0.414901	0.00121868	-0.199488	0.142297	-0.4238	0.0223228	-0.227069	0.138334
Q92686	Neurogranin	-0.82813	0.0916009	0.225024	#DIV/0!	1.05315	#DIV/0!	-0.617499	0.192168	-0.760094	0.0465896	-0.0242809	0.0614491	0.941363	#DIV/0!	0.142595	0.678187
Q9BVG4	Protein PBDC1	-0.254301	0.0922102	-0.00408921	0.977739	0.250212	0.230081	-0.154216	0.23177	-0.0170618	0.893156	-0.163566	0.343977	0.0403499	0.775764	-0.137155	0.253432
Q9NRM2	Zinc finger protein 277	0.540613	0.0930954	-0.235397	0.238893	-0.776011	0.0276377	0.230209	0.36488	0.715847	0.00455151	-0.154917	0.536101	-1.08452	0.0292999	-0.485638	0.0706101
Q14376	UDP-glucose 4-epimerase	-0.473771	0.093239	0.388075	0.584669	0.861846	0.279011	-0.129033	0.727124	-0.0682888	0.824315	-0.3405	0.394425	0.426648	0.580177	-0.0607437	0.85082
Q15334	Lethal(2) giant larvae protein homolog 1	0.159892	0.0932909	-0.0706235	0.579341	-0.230516	0.134605	0.0676859	0.465316	0.158053	0.0738808	-0.00579317	0.87513	-0.248231	0.0574204	-0.0903673	0.285606
Q8N2F6	Armadillo repeat-containing protein 10	0.445829	0.0935905	-0.51473	#DIV/0!	-0.960558	#DIV/0!	0.253717	0.406683	0.371224	0.236664	0.388424	0.196608	-1.19977	#DIV/0!	-0.117507	0.717985
Q9NPH2	Inositol-3-phosphate synthase 1	-0.450974	0.0936862	0.0564429	0.812139	0.507417	0.180252	-0.248008	0.213288	-0.648542	0.00525516	0.312179	0.294054	0.783802	0.0377354	0.400534	0.111676
P54105	Methylosome subunit pICln	-0.30028	0.0939564	-0.169258	0.390753	0.131022	0.486508	-0.247871	0.131224	-0.35612	0.0344732	0.126015	0.0434212	0.221509	0.248514	0.108249	0.329726
P17844	Probable ATP-dependent RNA helicase DDX5	0.311052	0.0939571	-0.337866	0.0160194	-0.648918	0.0201031	0.0514844	0.747291	0.512552	0.00134886	-0.218926	0.0214581	-0.977116	0.00195916	-0.461068	0.0185487
Q8N6M0	Deubiquitinase OTUD6B	0.301527	0.0942754	0.0613114	0.704445	-0.240216	0.0316813	0.205441	0.188665	0.411446	0.00890731	0.011793	0.169859	-0.504497	0.0156363	-0.206005	0.0592948
P36954	DNA-directed RNA polymerase II subunit RPB9	0.603908	0.0943939	0.193162	#DIV/0!	-0.410746	#DIV/0!	0.521759	0.124328	0.550211	0.118464	-0.111705	0.885822	-0.191646	#DIV/0!	-0.0284519	0.913826
Q9BYD2	39S ribosomal protein L9, mitochondrial	0.478071	0.0951172	0.201868	#DIV/0!	-0.276202	#DIV/0!	0.42283	0.134165	0.726917	0.0292385	-0.26084	0.0144381	-0.513054	#DIV/0!	-0.304086	0.115436
Q96CV9	Optineurin	-0.177825	0.0951667	-0.0435462	0.822605	0.134279	0.487311	-0.0972576	0.455491	0.056978	0.666394	-0.246192	0.624432	-0.0775665	0.732101	-0.154236	0.284373
P12532	Creatine kinase U-type, mitochondrial	0.365692	0.0954949	-0.187375	0.258452	-0.553068	0.0359206	0.144465	0.41855	0.221256	0.262909	0.0833537	0.681694	-0.327068	0.441949	-0.0767904	0.718469
P05106	Integrin beta-3	-0.418824	0.0957067	-0.032163	0.938365	0.386661	0.303247	-0.264159	0.319662	-0.502989	0.0661797	0.141391	0.660724	0.341496	0.542679	0.23883	0.281721
Q16527	Cysteine and glycine-rich protein 2	0.605038	0.0957575	0.0202139	0.958752	-0.584824	0.379318	0.371108	0.181806	0.269482	0.128685	0.375801	0.363712	-0.342246	0.417439	0.101626	0.691471
P62081	40S ribosomal protein S7	0.346713	0.0959154	-0.0388815	0.823352	-0.385595	0.0609953	0.192475	0.310276	0.567906	0.00536509	-0.174838	0.0691726	-0.600806	0.0585623	-0.375431	0.00715279
Q9H583	HEAT repeat-containing protein 1	0.272144	0.0966702	0.143661	#DIV/0!	-0.128483	#DIV/0!	0.246447	0.0638332	0.359653	0.111751	-0.137308	0.861866	-0.166192	#DIV/0!	-0.113205	0.575511
Q5EBL8	PDZ domain-containing protein 11	-0.38177	0.0970434	-0.218206	0.285461	0.163564	0.0420257	-0.283631	0.186698	-0.531097	0.0364005	0.131073	0.580389	0.467596	0.0131727	0.247466	0.0274187
O60563	Cyclin-T1	0.30666	0.0970567	-0.244563	#DIV/0!	-0.551223	#DIV/0!	0.196416	0.275079	0.458748	0.0137197	-0.0904497	0.453832	-0.764949	#DIV/0!	-0.262333	0.198916
P08294	Extracellular superoxide dismutase [Cu-Zn]	-0.705491	0.0971762	0.5212	0.264075	1.22669	0.025791	-0.214814	0.596809	-1.17405	0.0157603	0.651738	0.126912	2.00822	0.0145386	0.959235	0.0447246
P61247	40S ribosomal protein S3a	0.331962	0.0975326	-0.0017179	0.991994	-0.33368	0.149531	0.19849	0.24624	0.502507	0.00486554	-0.111316	0.158047	-0.596486	0.0500218	-0.304017	0.0343136
Q96EK7	Constitutive coactivator of peroxisome proliferator-activated receptor gamma	0.184665	0.0980101	0.212817	#DIV/0!	0.0281522	#DIV/0!	0.190295	0.0375536	0.0347202	0.536871	0.159686	0.562611	0.168355	#DIV/0!	0.155575	0.0649757
P61026	Ras-related protein Rab-10	0.235115	0.0981541	0.0599282	0.58256	-0.175187	0.190577	0.16504	0.151768	0.115067	0.258265	0.160741	0.126457	-0.115298	0.38626	0.0499737	0.540151
O96008	Mitochondrial import receptor subunit TOM40 homolog	0.240414	0.0985086	-0.057594	0.722068	-0.298008	0.0980361	0.121211	0.342583	0.374766	0.0144688	-0.0703506	0.754529	-0.563082	0.220136	-0.253555	0.0888731
Q08043	Alpha-actinin-3	0.445862	0.0986379	-0.370668	#DIV/0!	-0.81653	#DIV/0!	0.282556	0.3358	0.389414	0.114749	-0.0156923	0.00710931	-0.687941	#DIV/0!	-0.106858	0.638039
P51531	Probable global transcription activator SNF2L2	0.207528	0.0990545	0.311142	0.0434904	0.103614	0.374157	0.248973	0.0420078	0.360018	0.0108845	-0.126798	0.272256	-0.111674	0.577657	-0.111044	0.263513
P46527	Cyclin-dependent kinase inhibitor 1B	-0.612619	0.0992443	0.121113	#DIV/0!	0.733732	#DIV/0!	-0.465873	0.156777	-0.622416	0.0277115	0.129552	0.45982	0.623773	#DIV/0!	0.156543	0.622785
Q9BXJ9	N-alpha-acetyltransferase 15, NatA auxiliary subunit	0.26539	0.0994581	-0.203973	0.154653	-0.469363	0.0251264	0.0776451	0.586969	0.444074	0.00100995	-0.104162	0.375271	-0.723582	0.00581092	-0.366429	0.0123551
Q9NQX3	Gephyrin	-0.233739	0.0994878	0.0700313	0.538797	0.30377	0.0981404	-0.112231	0.317866	-0.190009	0.0292167	-0.0815999	0.926156	0.305436	0.137227	0.0777779	0.428025
P14543	Nidogen-1	-0.358623	0.0995128	-0.0672275	0.814809	0.291396	0.604687	-0.242065	0.169761	-0.38004	0.00895531	0.118287	0.108632	0.28853	0.298629	0.137975	0.435862
Q13616	Cullin-1	0.270103	0.0996111	-0.0229476	0.887414	-0.293051	0.279822	0.152883	0.216072	0.279997	0.00103629	-0.0761184	0.364404	-0.290784	0.0857128	-0.127114	0.276909
Q8IWA4	Mitofusin-1	0.184007	0.100435	0.0608443	0.520582	-0.123163	0.248999	0.134742	0.120218	0.272961	0.00477972	-0.0711158	0.545924	-0.27024	0.00108533	-0.138219	0.117489
P0DOY2	Immunoglobulin lambda constant 2	-0.600806	0.100542	0.714339	0.0898652	1.31514	0.00662842	-0.0747482	0.834684	-0.130578	0.674608	-0.0569952	0.198524	0.529979	0.0867039	0.0558294	0.878756
P07225	Vitamin K-dependent protein S	-0.384803	0.10082	0.210967	0.388122	0.59577	0.0240236	-0.146495	0.455782	-0.221258	0.267186	-0.0816473	0.513894	0.40034	0.204403	0.0747624	0.744808
O43293	Death-associated protein kinase 3	0.556069	0.101308	-0.62958	#DIV/0!	-1.18565	#DIV/0!	0.318939	0.400976	0.739244	0.154183	-0.331922	0.791453	-1.22008	#DIV/0!	-0.420305	0.414227
Q9GZY8	Mitochondrial fission factor	0.146605	0.101718	0.0150292	0.874155	-0.131575	0.0785211	0.0939744	0.231183	0.083179	0.3256	0.120985	0.0325226	-0.159339	0.484499	0.0107954	0.886762
O00170	AH receptor-interacting protein	0.399559	0.101966	-0.200259	0.383648	-0.599818	0.0551075	0.159632	0.437958	0.528867	0.00171875	-0.184315	0.319027	-0.719764	0.00552881	-0.369235	0.0504146
Q9P2B4	CTTNBP2 N-terminal-like protein	0.270517	0.101995	-0.262176	#DIV/0!	-0.532693	#DIV/0!	0.163979	0.368354	0.161401	0.343519	0.0550118	0.43663	-0.369473	#DIV/0!	0.00257761	0.988237
O95994	Anterior gradient protein 2 homolog	-0.773001	0.102173	-0.0398699	0.957638	0.733131	0.343794	-0.333122	0.541872	-0.388419	0.372466	-0.591882	0.418455	0.598459	0.441806	0.0552964	0.896854
Q9NTK5	Obg-like ATPase 1	0.270223	0.102228	-0.0956533	0.551091	-0.365876	0.151781	0.123872	0.344078	0.383811	0.00149415	-0.0776515	0.099861	-0.621059	0.00986809	-0.259938	0.0670708
P02745	Complement C1q subcomponent subunit A	-0.355269	0.102476	0.234854	0.218772	0.590124	0.00777668	-0.11922	0.577825	-0.16828	0.464779	0.0966299	0.716006	0.171097	0.269235	0.0490598	0.790148
O75475	PC4 and SFRS1-interacting protein	-0.29885	0.102886	-0.293994	0.143755	0.00485592	0.904625	-0.296907	0.0277959	0.0112089	0.920015	-0.215805	0.451731	-0.489372	0.0231646	-0.308116	0.0284544
Q02952	A-kinase anchor protein 12	-0.419562	0.10292	0.194851	0.394843	0.614413	0.0982135	-0.173797	0.408626	-0.35832	0.0904444	0.0985396	0.616848	0.5277	0.117076	0.184523	0.427836
O76021	Ribosomal L1 domain-containing protein 1	0.82683	0.103191	-0.465201	0.429236	-1.29203	0.0791308	0.310017	0.468481	0.936871	0.00716292	-0.495918	0.29345	-1.31007	0.0316399	-0.626854	0.160688
O15042	U2 snRNP-associated SURP motif-containing protein	0.291261	0.103303	-0.198853	0.314386	-0.490115	0.0900367	0.0952154	0.530545	0.477359	0.000309126	-0.222568	0.0198347	-0.742014	0.00600863	-0.382143	0.0220101
Q9NR30	Nucleolar RNA helicase 2	0.438668	0.103545	-0.152683	0.660685	-0.59135	0.104028	0.202128	0.382293	0.431415	0.0295171	-0.235134	0.402169	-0.509234	0.0771209	-0.229287	0.339123
Q12959	Disks large homolog 1	0.206672	0.10381	-0.153596	0.570513	-0.360268	0.217361	0.0625648	0.649845	0.0681554	0.549767	0.120467	0.437252	-0.21003	0.293919	-0.00559058	0.970491
Q9Y6A5	Transforming acidic coiled-coil-containing protein 3	-0.32561	0.104019	-0.0728657	#DIV/0!	0.252744	#DIV/0!	-0.275061	0.164839	-0.366693	0.0757613	0.0100637	0.657005	0.324847	#DIV/0!	0.0916324	0.273878
Q8IV36	Protein HID1	-0.869938	0.104184	0.252657	0.764973	1.12259	0.233182	-0.196381	0.758409	-0.435346	0.438573	-0.575205	0.493123	0.853518	0.497482	0.238965	0.684944
Q6NVY1	3-hydroxyisobutyryl-CoA hydrolase, mitochondrial	0.315354	0.104375	0.087215	0.751709	-0.228139	0.448408	0.224099	0.247394	0.172505	0.41204	0.0765027	0.767476	-0.164208	0.3218	0.0515934	0.760552
Q8TBC5	Zinc finger and SCAN domain-containing protein 18	-0.251033	0.104842	0.146858	0.311859	0.397892	0.0496884	-0.0122983	0.934088	-0.234218	0.119204	0.0514239	0.653257	0.395023	0.0908361	0.221919	0.183516
P05114	Non-histone chromosomal protein HMG-14	-0.31184	0.104904	-0.095793	0.581364	0.216047	0.126706	-0.225421	0.199637	0.0921834	0.677795	-0.265757	0.187346	-0.547895	0.0119475	-0.317604	0.0905453
O43399	Tumor protein D54	0.161152	0.105017	0.0893903	0.517555	-0.0717615	0.955157	0.132447	0.129494	0.232213	0.0188333	0.003968	0.583977	-0.268388	0.231705	-0.0997655	0.283943
Q9H6H4	Receptor expression-enhancing protein 4	0.19315	0.105027	-0.0226544	0.858668	-0.215804	0.218575	0.106828	0.26859	0.206292	0.0388214	0.0757206	0.637091	-0.38778	0.0809237	-0.0994639	0.351649
Q96RQ9	L-amino-acid oxidase	0.548504	0.105359	-0.600582	#DIV/0!	-1.14909	#DIV/0!	0.318687	0.402273	1.17485	0.0150791	-1.07625	0.10231	-1.32553	#DIV/0!	-0.856162	0.065444
O00468	Agrin	-0.193012	0.105444	0.0272185	0.888202	0.22023	0.344568	-0.10492	0.369606	-0.103054	0.440132	0.0580615	0.672191	0.0033195	0.986206	-0.00186608	0.989102
Q5K4L6	Solute carrier family 27 member 3	-0.234737	0.105667	-0.0390235	0.858432	0.195714	0.421828	-0.156452	0.261543	-0.190823	0.12853	-0.0316376	0.904392	0.201253	0.478482	0.0343717	0.762559
Q08170	Serine/arginine-rich splicing factor 4	0.452406	0.105959	-0.235155	0.417856	-0.687561	0.0908754	0.177382	0.461553	0.63495	0.00785309	-0.213963	0.0737263	-0.954596	0.00170538	-0.457569	0.0739851
P60842	Eukaryotic initiation factor 4A-I	0.278777	0.106024	-0.33863	0.000256832	-0.617407	0.021317	0.0318142	0.828045	0.356597	0.00909102	-0.00604425	0.485747	-0.753241	0.0212542	-0.324783	0.0631046
Q07812	Apoptosis regulator BAX	0.248777	0.106523	0.130304	0.540571	-0.118473	0.522532	0.201387	0.166592	0.431428	0.00866892	0.0137035	0.771195	-0.425213	0.261622	-0.230041	0.0858306
O14950	Myosin regulatory light chain 12B	0.296279	0.106647	-0.0710919	0.736137	-0.367371	0.163306	0.149331	0.387777	0.282673	0.0764611	0.0298175	0.714604	-0.319693	0.176394	-0.133343	0.297481
Q14151	Scaffold attachment factor B2	0.273431	0.107319	-0.258994	0.212154	-0.532425	0.0538632	0.0604607	0.701343	0.570873	0.000119353	-0.274971	0.0301584	-0.939421	0.00274031	-0.510412	0.0041022
P35237	Serpin B6	-0.243193	0.107571	0.120281	0.362587	0.363474	0.0439904	-0.0978035	0.462242	-0.0451125	0.707531	-0.149741	0.57113	0.187905	0.199686	-0.052691	0.651266
Q7L5L3	Lysophospholipase D GDPD3	-0.401625	0.107687	-0.211413	#DIV/0!	0.190212	#DIV/0!	-0.363583	0.0856627	-1.00531	0.0262732	0.941351	0.154614	0.456238	#DIV/0!	0.641731	0.0983228
Q96L91	E1A-binding protein p400	0.339146	0.10786	-0.109758	#DIV/0!	-0.448903	#DIV/0!	0.249365	0.192413	0.613109	0.00263153	-0.285345	0.192383	-0.711484	#DIV/0!	-0.363744	0.0833319
Q9Y646	Carboxypeptidase Q	-0.383563	0.108085	0.161199	0.78214	0.544763	0.340053	-0.165658	0.567543	-0.288898	0.233868	0.00488058	0.86131	0.441304	0.209561	0.123239	0.654519
P18621	60S ribosomal protein L17	0.328574	0.108496	-0.0505414	0.732963	-0.379115	0.121651	0.176928	0.291904	0.50446	0.00659012	-0.112651	0.234522	-0.644126	0.127287	-0.327532	0.0489494
P68871	Hemoglobin subunit beta	-0.886634	0.108688	0.134934	0.851152	1.02157	0.272709	-0.478007	0.313119	-0.458279	0.2465	0.0973613	0.600233	0.0831876	0.919433	-0.0197281	0.966259
P67936	Tropomyosin alpha-4 chain	0.207422	0.10883	0.103682	0.59264	-0.10374	0.613973	0.165926	0.169624	0.401535	0.00887209	-0.300449	0.115004	-0.296598	0.229359	-0.235608	0.0921806
O60333	Kinesin-like protein KIF1B	-0.401204	0.10888	-0.0932916	0.748398	0.307913	0.290431	-0.278039	0.251542	-0.350241	0.14928	0.159074	0.285864	0.0109116	0.96706	0.0722019	0.632403
Q9Y6I3	Epsin-1	0.158703	0.108901	-0.0260749	0.869167	-0.184778	0.390162	0.0847918	0.384004	0.103606	0.222873	0.102658	0.347093	-0.115296	0.605143	-0.0188138	0.826913
P00533	Epidermal growth factor receptor	0.455674	0.108986	-0.1277	0.413418	-0.583374	0.142584	0.222324	0.244254	0.470539	0.024691	-0.0224121	0.628942	-0.647812	0.224386	-0.248214	0.31916
Q9Y2B0	Protein canopy homolog 2	-0.409032	0.10901	0.251097	0.315295	0.660128	0.0544655	-0.14498	0.529998	-0.0172157	0.941393	-0.192392	0.815452	0.238706	0.328244	-0.127765	0.588314
Q9H845	Complex I assembly factor ACAD9, mitochondrial	0.52612	0.109448	-0.094565	0.766398	-0.620685	0.218536	0.277846	0.284045	0.521644	0.0301513	-0.0292066	0.522665	-0.860757	0.00747578	-0.243797	0.364339
P52630	Signal transducer and activator of transcription 2	0.493518	0.109765	0.103735	0.801188	-0.389783	0.313055	0.337605	0.178817	0.98362	1.1189e-05	-0.37476	0.0899908	-1.02905	0.0482245	-0.646015	0.0143101
P22223	Cadherin-3	0.543501	0.110004	-0.710027	#DIV/0!	-1.25353	#DIV/0!	0.292796	0.437796	1.18509	0.0025069	-0.395119	0.994756	-2.14159	#DIV/0!	-0.892296	0.0483801
P17096	High mobility group protein HMG-I/HMG-Y	0.321091	0.110135	-0.191179	0.529118	-0.51227	0.159233	0.116183	0.558462	0.316029	0.0859349	0.180357	0.500026	-0.711456	0.0705593	-0.199846	0.304962
Q96EE3	Nucleoporin SEH1	0.292304	0.110181	-0.0718551	0.74132	-0.364159	0.21218	0.146641	0.365962	0.454244	0.00233013	-0.13569	0.163492	-0.59318	0.0415317	-0.307603	0.0367185
P29144	Tripeptidyl-peptidase 2	-0.221678	0.110381	0.0873352	0.454351	0.309013	0.111516	-0.0980729	0.361798	-0.0175846	0.820776	-0.113037	0.864351	0.00759846	0.935944	-0.0804883	0.439862
Q9HC38	Glyoxalase domain-containing protein 4	-0.209472	0.11077	0.0819797	0.667864	0.291451	0.148915	-0.0928912	0.496681	0.170889	0.306273	-0.178372	0.320147	-0.216432	0.386156	-0.26378	0.0902885
P78371	T-complex protein 1 subunit beta	0.139144	0.110885	0.0132003	0.888326	-0.125944	0.182857	0.0887667	0.231948	0.284209	0.000261951	-0.118463	0.0649818	-0.27927	0.0193615	-0.195443	0.00475551
Q969J3	BLOC-1-related complex subunit 5	0.263661	0.110889	0.0928667	#DIV/0!	-0.170794	#DIV/0!	0.229502	0.159622	0.120185	0.498165	0.248087	0.0113212	-0.131929	#DIV/0!	0.109317	0.356104
Q5BJH7	Protein YIF1B	0.226902	0.110987	0.177897	0.229743	-0.0490055	0.563865	0.2073	0.125152	0.396551	0.0130615	-0.111095	0.494499	-0.342391	0.0993813	-0.189251	0.0678711
P48634	Protein PRRC2A	0.21796	0.111484	0.0127841	0.923301	-0.205176	0.327021	0.13589	0.205149	0.305101	0.0131457	-0.0437262	0.453914	-0.377825	0.0368339	-0.169211	0.172279
Q96JB2	Conserved oligomeric Golgi complex subunit 3	-0.571099	0.111778	-0.00911468	0.986286	0.561984	0.30459	-0.233908	0.560176	-0.0687784	0.846446	-0.447065	0.498239	0.0522843	0.903879	-0.16513	0.633683
Q8N1F8	Serine/threonine-protein kinase 11-interacting protein	-0.38073	0.111789	-0.0124037	0.969343	0.368326	0.324013	-0.159734	0.448254	-0.00764041	0.956601	-0.15617	0.153762	-0.240247	0.501247	-0.152094	0.504874
Q3LXA3	Triokinase/FMN cyclase	-0.198176	0.111801	0.0853447	0.536759	0.283521	0.0290849	-0.0847677	0.477489	0.0628603	0.673765	-0.0795537	0.459648	-0.143515	0.50952	-0.147628	0.289541
P21399	Cytoplasmic aconitate hydratase	-0.224456	0.11183	0.092099	0.539795	0.316555	0.143586	-0.097834	0.432894	0.138011	0.234513	-0.227541	0.233654	-0.203938	0.208245	-0.235845	0.0552764
P22087	rRNA 2'-O-methyltransferase fibrillarin	0.538538	0.111869	-0.308778	0.315551	-0.847316	0.0665996	0.199612	0.477867	0.461798	0.0529999	-0.0677077	0.659352	-0.773339	0.00997649	-0.262187	0.341551
Q15758	Neutral amino acid transporter B(0)	0.444471	0.111905	0.104938	0.793371	-0.339532	0.491682	0.308658	0.195927	0.859449	0.0008741	-0.285777	0.310186	-0.88952	0.0803717	-0.550791	0.0420729
Q8IUZ5	5-phosphohydroxy-L-lysine phospho-lyase	-0.24437	0.112067	0.13288	0.56756	0.37725	0.212361	-0.0934698	0.552648	-0.0198443	0.900689	0.0169509	0.261403	-0.0354011	0.776995	-0.0736255	0.634383
Q9H2U1	ATP-dependent DNA/RNA helicase DHX36	0.396372	0.112071	-0.108374	0.596291	-0.504746	0.178593	0.194473	0.284387	0.525124	0.00692515	-0.0866825	0.279254	-0.845254	0.0185496	-0.330651	0.139479
Q9UBQ5	Eukaryotic translation initiation factor 3 subunit K	0.176163	0.112096	-0.0447749	0.731534	-0.220938	0.129233	0.0877879	0.41219	0.161664	0.141446	0.0448427	0.670343	-0.194609	0.407622	-0.0738757	0.405895
O00186	Syntaxin-binding protein 3	-0.348512	0.112373	-0.261198	0.272836	0.0873136	0.56956	-0.313586	0.135445	-0.358376	0.0852131	-0.0190905	0.85443	0.123456	0.506861	0.0447895	0.644614
Q9BVV7	Mitochondrial import inner membrane translocase subunit Tim21	0.327772	0.112449	0.129717	0.691511	-0.198055	0.385949	0.24855	0.211985	0.245295	0.20653	0.0552745	0.332264	-0.283123	0.271685	0.00325466	0.985554
P09238	Stromelysin-2	-0.287328	0.112478	-0.120485	#DIV/0!	0.166843	#DIV/0!	-0.253959	0.117421	0.170672	0.658977	-1.00568	0.31882	0.256523	#DIV/0!	-0.424632	0.301671
P01033	Metalloproteinase inhibitor 1	-0.684512	0.113138	0.518035	0.612472	1.20255	0.248736	-0.203493	0.706462	-0.284349	0.581814	-0.272137	0.719627	0.450719	0.643028	0.0808555	0.879762
P54819	Adenylate kinase 2, mitochondrial	0.261954	0.113207	-0.0591703	0.629286	-0.321124	0.0289058	0.133504	0.284352	0.489959	0.00141958	-0.209955	0.0878084	-0.733495	0.0132219	-0.356455	0.023336
Q9H2P0	Activity-dependent neuroprotector homeobox protein	0.157267	0.113358	-0.0297366	0.851105	-0.187004	0.421135	0.0824655	0.363255	0.179344	0.0541753	0.0387244	0.914517	-0.178073	0.303669	-0.0968784	0.359834
Q86YP4	Transcriptional repressor p66-alpha	0.29916	0.113511	-0.251796	0.117221	-0.550956	0.050275	0.0787775	0.605349	0.295678	0.0681822	0.0100697	0.668558	-0.614134	0.1161	-0.2169	0.262057
P09871	Complement C1s subcomponent	-0.318518	0.113611	0.378155	0.0782593	0.696673	0.00542405	-0.0398486	0.844181	-0.087509	0.642225	0.0557187	0.972639	0.239238	0.25037	0.0476604	0.804811
P35251	Replication factor C subunit 1	-0.298742	0.113621	-0.219955	0.445823	0.0787872	0.643684	-0.267227	0.149113	-0.0257367	0.867654	-0.249614	0.148508	-0.255288	0.273342	-0.24149	0.052004
Q13177	Serine/threonine-protein kinase PAK 2	0.207312	0.113704	-0.0134484	0.914544	-0.220761	0.175568	0.119008	0.258373	0.650132	4.0097e-05	-0.318513	0.00119693	-0.831848	0.00583704	-0.531124	0.000463051
Q96QA5	Gasdermin-A	0.607739	0.11375	0.0383131	0.910017	-0.569426	0.341217	0.379969	0.211359	-0.408061	0.189206	1.17949	0.0762621	0.564366	0.169516	0.78803	0.018461
Q8IXQ6	Protein mono-ADP-ribosyltransferase PARP9	0.345146	0.114481	-0.122715	0.512722	-0.467861	0.062698	0.158001	0.397063	0.745491	0.000244186	-0.367775	0.00943772	-1.00697	0.00323042	-0.58749	0.00192221
P00387	NADH-cytochrome b5 reductase 3	0.24564	0.114657	0.0942151	0.573073	-0.151425	0.448609	0.18507	0.170227	0.0454211	0.726193	0.192052	0.279988	-0.0803725	0.667024	0.139649	0.212166
P55268	Laminin subunit beta-2	-0.239484	0.114769	-0.159422	0.600308	0.0800622	0.772553	-0.207459	0.188983	-0.629028	0.000239427	0.433841	0.0055589	0.492177	0.0215663	0.421569	0.0101927
O00712	Nuclear factor 1 B-type	-0.192917	0.114789	-0.293294	0.0112457	-0.100378	0.0908216	-0.233068	0.0301804	-0.21952	0.0659304	0.0590009	0.555764	-0.118246	0.0959938	-0.0135479	0.883898
Q99442	Translocation protein SEC62	0.302351	0.114827	-0.0130608	#DIV/0!	-0.315412	#DIV/0!	0.239269	0.135986	0.322103	0.265673	0.209754	0.83605	-0.564669	#DIV/0!	-0.0828341	0.768885
Q96B26	Exosome complex component RRP43	0.261213	0.114966	0.0761012	#DIV/0!	-0.185112	#DIV/0!	0.22419	0.164746	0.429525	0.0440504	-0.0818476	0.997891	-0.439889	#DIV/0!	-0.205335	0.203304
P49736	DNA replication licensing factor MCM2	0.50355	0.115513	-0.135387	0.677234	-0.638937	0.232168	0.247975	0.32225	0.696122	0.000689349	-0.232021	0.0327758	-0.875101	0.0375702	-0.448146	0.0789874
P54920	Alpha-soluble NSF attachment protein	0.159163	0.115574	-0.090733	0.399741	-0.249896	0.102301	0.0592047	0.509787	0.19507	0.0199748	-0.0709157	0.0362469	-0.280691	0.0382409	-0.135865	0.118352
Q08J23	RNA cytosine C(5)-methyltransferase NSUN2	0.404171	0.115579	-0.123521	0.497959	-0.527692	0.160996	0.193094	0.284385	0.482232	1.79684e-05	-0.112081	0.240094	-0.569821	0.00326513	-0.289138	0.111654
Q9Y3Y2	Chromatin target of PRMT1 protein	0.274042	0.115644	-0.0760043	0.604679	-0.350047	0.139359	0.134024	0.344252	0.329433	0.0117868	0.0172977	0.829425	-0.548611	0.0138792	-0.195409	0.136598
Q96KQ7	Histone-lysine N-methyltransferase EHMT2	0.108049	0.115725	-0.110484	#DIV/0!	-0.218533	#DIV/0!	0.0643425	0.386423	-0.00799506	0.885327	0.137774	0.00409242	-0.124218	#DIV/0!	0.0723375	0.290789
Q9BZE4	GTP-binding protein 4	0.466435	0.115996	-0.334947	0.342546	-0.801382	0.0646877	0.145882	0.576842	0.53298	0.0225837	-0.263801	0.187447	-0.875381	0.0213891	-0.387098	0.163207
P61160	Actin-related protein 2	0.371444	0.116035	-0.124352	0.591054	-0.495796	0.144642	0.173126	0.357025	0.526243	0.00153896	-0.0894655	0.439489	-0.735939	0.0366657	-0.353117	0.0691547
Q92621	Nuclear pore complex protein Nup205	0.420475	0.116144	-0.23805	0.429238	-0.658525	0.123738	0.157065	0.482448	0.592926	0.00215315	-0.211912	0.121166	-0.957712	0.0082799	-0.435861	0.0680341
Q9BQ50	Three prime repair exonuclease 2	0.477219	0.116152	0.137942	0.760966	-0.339277	0.551726	0.341508	0.232944	-0.438928	0.25912	0.872885	0.11952	1.0347	0.0697302	0.780437	0.0501651
Q9NQ79	Cartilage acidic protein 1	-0.271677	0.116422	0.0580963	0.849246	0.329773	0.283669	-0.139768	0.451731	-0.427658	0.0394477	0.244464	0.290808	0.480373	0.167659	0.287891	0.129793
Q5JSH3	WD repeat-containing protein 44	-0.163527	0.11643	-0.133191	0.145784	0.030336	0.925043	-0.151393	0.0553227	0.135903	0.103043	-0.242812	0.20187	-0.333228	0.0252528	-0.287296	0.0015572
P16333	Cytoplasmic protein NCK1	0.191496	0.116713	-0.14446	0.265157	-0.335956	0.0862854	0.0571136	0.57893	0.19804	0.0366189	0.0663358	0.8857	-0.504806	0.0748209	-0.140926	0.222538
P09661	U2 small nuclear ribonucleoprotein A'	0.26831	0.116764	0.0658717	0.681941	-0.202439	0.411271	0.187335	0.194874	0.325397	0.0289242	-0.0147956	0.483204	-0.294574	0.153337	-0.138062	0.253757
P55011	Solute carrier family 12 member 2	-0.617176	0.116901	0.586466	0.470134	1.20364	0.197165	-0.135719	0.771883	-0.290292	0.45594	-0.520436	0.289287	1.15666	0.158435	0.154573	0.69862
Q6SPF0	Sterile alpha motif domain-containing protein 1	0.215092	0.117767	-0.20232	#DIV/0!	-0.417412	#DIV/0!	0.131609	0.385889	0.403522	0.0145131	-0.0979456	0.693479	-0.696327	#DIV/0!	-0.271913	0.0470161
P22307	Sterol carrier protein 2	0.242794	0.118057	-0.228826	0.149604	-0.47162	0.0545047	0.054146	0.677948	0.335813	0.0163452	-0.143583	0.0802595	-0.67795	0.0332234	-0.281667	0.0902294
P25490	Transcriptional repressor protein YY1	0.229017	0.118085	-0.138886	0.497895	-0.367904	0.133775	0.0818558	0.556787	0.379306	0.00657994	-0.193175	0.15956	-0.540678	0.0384475	-0.29745	0.0439329
P06727	Apolipoprotein A-IV	-0.430408	0.118126	0.444947	0.058332	0.875355	0.00553675	-0.0802663	0.736988	-0.51035	0.0724529	0.252668	0.656119	1.10421	0.048843	0.430083	0.172454
Q6UWD8	Transmembrane protein C16orf54	-0.2744	0.118135	-0.108461	#DIV/0!	0.165939	#DIV/0!	-0.241212	0.130654	0.179063	0.372321	-0.246127	0.0270956	-0.494859	#DIV/0!	-0.420275	0.0569798
O75934	Pre-mRNA-splicing factor SPF27	0.231086	0.118254	-0.113681	0.432992	-0.344767	0.0350512	0.0931792	0.511779	0.292692	0.0348728	-0.0709892	0.197796	-0.391013	0.0275954	-0.199513	0.050075
Q9H9A6	Leucine-rich repeat-containing protein 40	-0.0795791	0.11873	0.0573664	0.505845	0.136946	0.173173	0.0025882	0.96864	0.125168	0.0821586	-0.111874	0.32332	-0.136585	0.213137	-0.12258	0.115102
Q8NCG7	Diacylglycerol lipase-beta	0.359452	0.119033	-0.264762	0.557198	-0.624214	0.232239	-0.0150767	0.959142	0.152296	0.325026	0.239906	0.561593	-0.283062	0.97471	-0.167373	0.568595
Q15691	Microtubule-associated protein RP/EB family member 1	0.266154	0.119128	-0.189063	0.26442	-0.455217	0.0610257	0.0840675	0.577767	0.479218	0.00151005	-0.148882	0.00819905	-0.782035	0.00232313	-0.395151	0.0131751
P40425	Pre-B-cell leukemia transcription factor 2	-0.30007	0.119194	-0.171456	0.463707	0.128613	0.719097	-0.248624	0.147097	-0.308125	0.072214	0.0847643	0.321153	0.0910091	0.710281	0.0595002	0.668273
Q9UJC5	SH3 domain-binding glutamic acid-rich-like protein 2	-0.188249	0.119259	0.0816001	0.368519	0.269849	0.0347016	-0.0803091	0.437432	-0.343974	0.0100082	0.145302	0.477398	0.513401	0.000602667	0.263665	0.0347169
Q7KZ85	Transcription elongation factor SPT6	0.410552	0.11981	-0.138294	0.813224	-0.548846	0.357235	0.191013	0.474465	0.380088	0.0074586	0.0554736	0.77646	-0.469383	0.502748	-0.189074	0.495227
O43390	Heterogeneous nuclear ribonucleoprotein R	0.323562	0.12	-0.077015	0.680725	-0.400577	0.0576729	0.163331	0.396986	0.540591	0.0101449	-0.221256	0.0417841	-0.770831	0.00072207	-0.37726	0.0140938
P32455	Guanylate-binding protein 1	0.632361	0.120178	-0.054972	0.912977	-0.687333	0.255222	0.357428	0.338218	1.42895	0.00124395	-1.01715	0.024254	-1.26519	0.00111772	-1.07152	0.00747385
P07437	Tubulin beta chain	0.230974	0.120263	-0.062314	0.800642	-0.293288	0.363261	0.113659	0.42506	0.384399	0.00262396	-0.081357	0.284984	-0.538676	0.0675437	-0.270741	0.0608108
Q96I15	Selenocysteine lyase	-0.240826	0.120388	-0.137555	0.571854	0.103271	0.917293	-0.199517	0.132492	-0.0319641	0.727824	-0.0844487	0.937382	-0.169179	0.471306	-0.167553	0.186781
Q9UGP4	LIM domain-containing protein 1	-0.232005	0.120514	0.41627	#DIV/0!	0.648275	#DIV/0!	-0.10235	0.565618	-0.0832618	0.535227	-0.0494774	0.889912	0.400266	#DIV/0!	-0.019088	0.921789
O94903	Pyridoxal phosphate homeostasis protein	-0.294299	0.120992	-0.0717733	0.586751	0.222526	0.209251	-0.160784	0.228972	-0.0682772	0.610543	-0.206979	0.0616516	0.140113	0.00173158	-0.0925064	0.443112
Q6NXE6	Armadillo repeat-containing protein 6	0.121376	0.121193	0.204407	0.187498	0.0830305	0.748794	0.154589	0.0650517	0.188325	0.0679926	-0.0799519	0.794931	0.0571062	0.605159	-0.0337361	0.719111
P05783	Keratin, type I cytoskeletal 18	-0.733337	0.121206	0.0523839	0.947561	0.785721	0.405496	-0.419049	0.405	0.204899	0.728343	-0.749347	0.382607	-0.38707	0.627111	-0.623948	0.249345
P40121	Macrophage-capping protein	0.278147	0.121333	-0.057278	0.824585	-0.335425	0.426259	0.143977	0.367426	0.613039	0.000116966	-0.333384	0.0505526	-0.634656	0.103724	-0.469062	0.00790781
P55058	Phospholipid transfer protein	-0.568251	0.121471	0.340499	#DIV/0!	0.908749	#DIV/0!	-0.386501	0.302203	-0.404261	0.426113	0.516918	0.535334	0.0638528	#DIV/0!	0.0177605	0.970807
Q7L014	Probable ATP-dependent RNA helicase DDX46	0.290551	0.121481	-0.171667	0.527553	-0.462218	0.182148	0.105664	0.553495	0.473517	0.00200929	-0.225644	0.0687551	-0.677336	0.0428153	-0.367853	0.0319841
Q8NHJ6	Leukocyte immunoglobulin-like receptor subfamily B member 4	-0.298181	0.121566	0.352912	0.427765	0.651093	0.239033	-0.0377441	0.870636	0.158409	0.347445	-0.358334	0.258436	0.166783	0.640807	-0.196154	0.376125
P08648	Integrin alpha-5	-0.243271	0.122253	-0.155674	0.465618	0.0875965	0.632217	-0.208232	0.173347	-0.0457265	0.750212	-0.189862	0.263031	-0.105258	0.276949	-0.162506	0.116957
Q3ZCQ3	Membrane protein FAM174B	-1.38743	0.122438	0.043769	0.974164	1.4312	0.305846	-0.52871	0.603775	-0.851106	0.329544	-0.908776	0.476893	1.14253	0.578201	0.322396	0.689874
Q9NZN5	Rho guanine nucleotide exchange factor 12	0.196254	0.122593	0.0129868	0.944906	-0.183267	0.537738	0.122947	0.245886	0.0985207	0.220533	0.0742223	0.906098	-0.0439118	0.855442	0.0244264	0.826965
P09104	Gamma-enolase	-0.289533	0.122614	0.236354	0.124534	0.525887	0.0115486	-0.0791781	0.634092	-0.0362145	0.832831	-0.0171463	0.216862	0.225437	0.0931318	-0.0429636	0.808928
Q9UHD8	Septin-9	0.305146	0.122813	-0.029785	0.933652	-0.334931	0.476095	0.171173	0.360282	0.487345	0.000677137	-0.177876	0.159572	-0.505823	0.147233	-0.316172	0.0946741
Q9BXX0	EMILIN-2	-0.464382	0.122867	-0.167187	0.410972	0.297195	0.342869	-0.345504	0.107937	-0.365509	0.0749305	0.03215	0.99507	0.250538	0.212321	0.0200048	0.923419
Q8IWZ8	SURP and G-patch domain-containing protein 1	0.202307	0.123146	0.089818	#DIV/0!	-0.112489	#DIV/0!	0.179809	0.116328	-0.177555	0.5675	0.0606003	0.666372	0.586635	#DIV/0!	0.357364	0.282274
Q92934	Bcl2-associated agonist of cell death	-0.151685	0.123301	-0.178852	0.256088	-0.0271674	0.913485	-0.162552	0.104726	-0.155867	0.181195	0.114121	0.32691	-0.059071	0.739215	-0.00668455	0.944235
P13646	Keratin, type I cytoskeletal 13	-0.741055	0.123692	-0.638604	0.197692	0.102451	0.964134	-0.700074	0.0368438	-1.18313	0.000296855	0.562659	0.152047	0.676299	0.28206	0.483054	0.176531
P62314	Small nuclear ribonucleoprotein Sm D1	0.56225	0.12393	0.231234	0.506341	-0.331016	0.29648	0.429843	0.197743	0.482638	0.132199	0.244248	0.315842	-0.304266	0.28927	-0.0527944	0.754529
Q8IV08	5'-3' exonuclease PLD3	-0.337393	0.124284	0.0142534	0.948235	0.351646	0.0811117	-0.196734	0.321263	0.35194	0.158313	-0.413814	0.0267131	-0.356017	0.33208	-0.548674	0.0196427
P00748	Coagulation factor XII	-0.296227	0.124679	0.434252	0.0689105	0.730479	0.00840684	-0.00403533	0.984415	-0.21248	0.308895	-0.0508165	0.487048	0.73017	0.0252679	0.208445	0.331526
Q01469	Fatty acid-binding protein 5	0.683668	0.124684	-0.474217	0.067759	-1.15788	0.0463261	0.220514	0.511649	-0.21817	0.538355	0.995599	0.0816294	-0.0348797	0.959668	0.438684	0.310561
P14678	Small nuclear ribonucleoprotein-associated proteins B and B'	0.234138	0.125161	-0.0526352	0.696091	-0.286774	0.0613937	0.119429	0.39632	0.42348	0.00485029	-0.159096	0.0118102	-0.545359	0.0177334	-0.304051	0.00297359
Q9NWV8	BRISC and BRCA1-A complex member 1	-0.22004	0.125402	0.113206	0.610722	0.333246	0.168121	-0.0867415	0.569263	-0.0843248	0.562637	-0.0140769	0.996098	0.190597	0.256561	-0.00241672	0.98456
Q96SB3	Neurabin-2	0.294178	0.125604	-0.118863	0.697366	-0.413041	0.278528	0.128961	0.456943	0.426604	0.00140602	-0.141316	0.317496	-0.58248	0.0923313	-0.297643	0.100616
Q9NVG8	TBC1 domain family member 13	-0.175445	0.126021	0.106495	0.340062	0.28194	0.0681321	-0.0626691	0.540505	0.0872862	0.402841	-0.0796563	0.876187	-0.189454	0.156149	-0.149955	0.158704
Q96CS3	FAS-associated factor 2	0.215477	0.126075	0.0225421	0.912764	-0.192935	0.34899	0.138303	0.302253	0.408955	0.00309238	-0.154937	0.181283	-0.456217	0.00898142	-0.270652	0.027589
O95202	Mitochondrial proton/calcium exchanger protein	0.27749	0.126097	0.0357152	0.886561	-0.241775	0.251349	0.18078	0.262374	0.537776	0.00324856	-0.322532	0.00569015	-0.645406	0.0328043	-0.356996	0.0450443
P62913	60S ribosomal protein L11	0.372217	0.126236	0.105521	0.556953	-0.266695	0.441956	0.265539	0.160426	0.537425	0.011817	-0.147909	0.0954907	-0.390454	0.251124	-0.271886	0.147148
Q96QC0	Serine/threonine-protein phosphatase 1 regulatory subunit 10	0.227839	0.126292	-0.183872	0.123975	-0.411712	0.0595322	0.0631547	0.592056	0.293957	0.0111036	-0.076076	0.142725	-0.51709	0.108637	-0.230802	0.100675
P63244	Receptor of activated protein C kinase 1	0.250981	0.126814	-0.0274267	0.821933	-0.278408	0.150425	0.139618	0.305527	0.290361	0.0466138	0.0366374	0.972992	-0.337375	0.151242	-0.150743	0.23039
O95425	Supervillin	0.216263	0.127189	0.0456211	0.446162	-0.170642	0.180461	0.148006	0.101282	0.130048	0.123879	0.0239218	0.682439	-0.0633481	0.453552	0.017958	0.86094
Q0VF96	Cingulin-like protein 1	-0.797326	0.127202	0.118646	0.875581	0.915972	0.254413	-0.247743	0.672213	-0.332568	0.477035	-0.610632	0.19924	0.666363	0.691672	0.0848249	0.849382
P06702	Protein S100-A9	0.331969	0.12724	-0.646288	0.0258382	-0.978257	0.00643772	-0.0593335	0.811356	0.0580448	0.796798	0.404693	0.154256	-0.763101	0.242726	-0.117378	0.640428
P04439	HLA class I histocompatibility antigen, A alpha chain	0.490033	0.12728	-0.372633	0.25369	-0.862666	0.0121855	0.144966	0.653097	0.739925	0.0251398	-0.502365	0.0031768	-0.768948	0.000825087	-0.594959	0.0189026
O00267	Transcription elongation factor SPT5	0.197602	0.127428	-0.148066	0.169959	-0.345668	0.0333297	0.0593348	0.611057	0.394428	0.000571579	-0.224385	0.0497374	-0.507611	0.0152974	-0.335093	0.00203583
Q9Y224	RNA transcription, translation and transport factor protein	0.205822	0.127504	-0.21534	0.134125	-0.421162	0.0125712	0.0373574	0.784268	0.357186	0.00735822	-0.168117	0.13199	-0.61458	0.00101128	-0.319829	0.00796029
P21810	Biglycan	-0.484055	0.12762	0.332912	0.471137	0.816967	0.10016	-0.157268	0.628307	-0.778273	0.0124415	0.226783	0.427133	1.34214	0.0566993	0.621005	0.0325568
Q8N766	ER membrane protein complex subunit 1	-0.56788	0.127808	-0.411384	#DIV/0!	0.156497	#DIV/0!	-0.536581	0.129418	-0.138717	0.648744	-0.434358	0.164312	-0.267471	#DIV/0!	-0.397864	0.0476707
P30050	60S ribosomal protein L12	0.283131	0.127862	0.00779767	0.972255	-0.275334	0.265348	0.172998	0.331522	0.354089	0.0577786	-0.0394966	0.605809	-0.218852	0.508133	-0.181091	0.194563
O43432	Eukaryotic translation initiation factor 4 gamma 3	0.210685	0.127927	0.0660521	0.698341	-0.144633	0.454179	0.152832	0.192587	0.404581	0.0024122	-0.0689786	0.643895	-0.455299	0.0572531	-0.251749	0.0457651
Q96MG7	Non-structural maintenance of chromosomes element 3 homolog	-0.271613	0.128025	-0.237224	0.525262	0.0343892	0.940994	-0.257858	0.163716	-0.0180097	0.887796	-0.307385	0.217685	-0.16456	0.658132	-0.239848	0.128434
Q96CT7	Coiled-coil domain-containing protein 124	0.20695	0.129554	0.0893656	0.613446	-0.117584	0.299429	0.159916	0.209602	0.164758	0.175585	0.0380019	0.0678404	0.0114309	0.951614	-0.00484209	0.958552
Q15006	ER membrane protein complex subunit 2	0.142898	0.129892	-0.00213069	0.966193	-0.145029	0.0451653	0.0848867	0.219106	0.267331	0.00033524	-0.0650516	0.869857	-0.345902	0.00608373	-0.182445	0.0106784
Q15393	Splicing factor 3B subunit 3	0.212425	0.130083	-0.121899	0.399189	-0.334324	0.119389	0.0786951	0.507483	0.389794	0.000528554	-0.190808	0.0217214	-0.577626	0.00354286	-0.311098	0.013059
Q96F07	Cytoplasmic FMR1-interacting protein 2	-0.351857	0.130373	-0.483829	#DIV/0!	-0.131971	#DIV/0!	-0.378251	0.0805272	-0.238983	0.204957	-0.162661	0.164728	-0.195059	#DIV/0!	-0.139269	0.31096
P13639	Elongation factor 2	0.3607	0.131076	-0.176902	0.546245	-0.537602	0.177887	0.145659	0.468962	0.547679	0.000510884	-0.159344	0.20702	-0.778052	0.013194	-0.40202	0.0493244
O14925	Mitochondrial import inner membrane translocase subunit Tim23	0.254675	0.131275	-0.0730498	0.74303	-0.327725	0.112948	0.123585	0.414142	0.0888168	0.488256	0.256888	0.0554356	-0.35202	0.237246	0.0347683	0.803902
Q13247	Serine/arginine-rich splicing factor 6	0.244854	0.131285	-0.566992	#DIV/0!	-0.811846	#DIV/0!	0.0824848	0.699944	0.275212	0.0190404	-0.0355712	0.361721	-0.836991	#DIV/0!	-0.192727	0.355013
P69891	Hemoglobin subunit gamma-1	-0.451192	0.131337	1.26938	0.494053	1.72057	0.377491	0.581149	0.570669	-0.102816	0.873587	0.488263	0.217707	0.154333	0.383738	0.683965	0.560168
Q8TF05	Serine/threonine-protein phosphatase 4 regulatory subunit 1	0.251096	0.131474	-0.318589	0.0275872	-0.569684	0.0138296	0.0232219	0.879189	0.366585	0.0144731	-0.0404684	0.899118	-0.695593	0.0975821	-0.343363	0.0458399
Q9UHR4	Brain-specific angiogenesis inhibitor 1-associated protein 2-like protein 1	0.293834	0.131728	-0.19017	0.59575	-0.484004	0.232096	0.100233	0.615681	0.367061	0.0814693	0.0427389	0.856261	-0.677441	0.246502	-0.266828	0.25755
Q9BV38	WD repeat-containing protein 18	0.15918	0.131862	-0.407794	#DIV/0!	-0.566974	#DIV/0!	0.0457849	0.758527	0.346211	0.00855986	-0.110857	0.791921	-0.83018	#DIV/0!	-0.300426	0.0774574
P63000	Ras-related C3 botulinum toxin substrate 1	0.338961	0.132373	-0.0280717	0.921319	-0.367033	0.30578	0.192148	0.306524	0.451206	0.00281188	-0.101563	0.373364	-0.567542	0.0454495	-0.259058	0.142069
Q02543	60S ribosomal protein L18a	0.448082	0.132585	-0.0255705	0.925024	-0.473653	0.136793	0.258621	0.31359	0.657445	0.0122426	-0.120179	0.499321	-0.874779	0.0317773	-0.398824	0.0616204
Q8IXQ4	GPALPP motifs-containing protein 1	-0.167003	0.132689	-0.16388	0.486668	0.00312369	0.988744	-0.165129	0.225272	0.0302081	0.673483	-0.159056	0.177937	-0.21019	0.230414	-0.195337	0.140815
O95793	Double-stranded RNA-binding protein Staufen homolog 1	0.205495	0.132815	-0.155306	0.308979	-0.360801	0.11486	0.061175	0.590235	0.272377	0.00179112	-0.0596798	0.145209	-0.474544	0.00585095	-0.211202	0.0784133
Q9H853	Putative tubulin-like protein alpha-4B	0.253371	0.132829	-0.109134	0.679661	-0.362504	0.276396	0.108369	0.48036	0.297727	0.00675186	-0.0185823	0.747304	-0.502773	0.0946137	-0.189358	0.204213
Q5JTH9	RRP12-like protein	0.703296	0.133357	-0.400532	0.457011	-1.10383	0.0899826	0.261765	0.523996	0.738805	0.0386761	-0.435221	0.351388	-1.01842	0.111036	-0.477041	0.227594
Q96QR8	Transcriptional activator protein Pur-beta	0.257792	0.13338	0.112514	0.588554	-0.145278	0.83553	0.199681	0.170057	0.175961	0.163373	0.155702	0.693183	-0.170153	0.539959	0.0237195	0.842244
P61289	Proteasome activator complex subunit 3	0.442535	0.134131	-0.131766	0.602529	-0.574301	0.0661877	0.212815	0.426906	0.576631	0.0260699	-0.187634	0.442279	-0.681504	0.0917417	-0.363816	0.041605
P08195	4F2 cell-surface antigen heavy chain	0.416904	0.134195	-0.0739724	0.59093	-0.490876	0.113031	0.220553	0.273553	0.701581	0.00152584	-0.118791	0.604843	-0.955416	0.0452039	-0.481028	0.03248
Q9H7M9	V-type immunoglobulin domain-containing suppressor of T-cell activation	0.126758	0.134806	-0.210551	0.122255	-0.337309	0.0372669	-0.00816545	0.930554	0.299692	0.00710745	-0.139529	0.237038	-0.636527	0.0207365	-0.307857	0.011213
Q53H47	Histone-lysine N-methyltransferase SETMAR	-0.1826	0.134932	0.0818959	0.698748	0.264496	0.178904	-0.0768015	0.56135	-0.125264	0.356959	0.0416466	0.988827	0.20096	0.477355	0.0484621	0.696536
Q86UU0	B-cell CLL/lymphoma 9-like protein	0.116811	0.135183	0.173112	#DIV/0!	0.056301	#DIV/0!	0.128071	0.0581998	-0.0474275	0.382911	0.130972	0.619823	0.253806	#DIV/0!	0.175498	0.0163663
O75683	Surfeit locus protein 6	0.289328	0.135198	-0.260442	#DIV/0!	-0.54977	#DIV/0!	0.179374	0.336451	0.521245	0.0160864	-0.238753	0.941739	-0.774851	#DIV/0!	-0.341871	0.132567
O94776	Metastasis-associated protein MTA2	0.312349	0.135458	-0.0786846	0.794825	-0.391034	0.342963	0.155936	0.391876	0.519374	0.000249458	-0.181366	0.199856	-0.639978	0.040289	-0.363439	0.0462412
Q9Y316	Protein MEMO1	0.357782	0.136155	-0.380083	#DIV/0!	-0.737865	#DIV/0!	0.210209	0.430575	-0.0929675	0.697046	0.580622	0.154953	-0.416988	#DIV/0!	0.303176	0.163337
Q7Z3B4	Nucleoporin p54	0.313365	0.136401	-0.236525	0.228611	-0.54989	0.0907109	0.093409	0.574052	0.518557	0.00157854	-0.239084	0.0577664	-0.872932	0.00295989	-0.425148	0.0340376
Q9BQ67	Glutamate-rich WD repeat-containing protein 1	0.131056	0.136595	-0.0790056	#DIV/0!	-0.210061	#DIV/0!	0.0890433	0.318238	0.288889	0.00727573	-0.136296	0.496441	-0.389432	#DIV/0!	-0.199846	0.0391377
O95456	Proteasome assembly chaperone 1	0.385359	0.136662	0.166165	#DIV/0!	-0.219194	#DIV/0!	0.34152	0.175068	0.579728	0.0344902	-0.290046	0.431927	-0.317887	#DIV/0!	-0.238208	0.0683584
Q7L1Q6	eIF5-mimic protein 2	0.383162	0.136813	-0.232696	0.398972	-0.615858	0.108801	0.136819	0.542176	0.633418	0.00273812	-0.2571	0.0369964	-0.888163	0.0115414	-0.4966	0.0280619
Q9H6W3	Ribosomal oxygenase 1	0.243354	0.136837	-0.0505046	0.640762	-0.293859	0.0626787	0.125811	0.346329	0.307073	0.0398994	-0.120871	0.542045	-0.318021	0.144781	-0.181262	0.171783
P17987	T-complex protein 1 subunit alpha	0.145976	0.136859	-0.0818927	0.429038	-0.227869	0.0329897	0.0548287	0.556189	0.325446	0.00108577	-0.139741	0.00775462	-0.486815	0.0174737	-0.270618	0.00115572
Q9BQE5	Apolipoprotein L2	0.361808	0.137071	0.0268857	0.898033	-0.334922	0.197955	0.227839	0.265008	1.06598	0.000215522	-0.586013	0.00625226	-1.21229	0.0291705	-0.83814	0.00107948
P46087	Probable 28S rRNA (cytosine(4447)-C(5))-methyltransferase	0.479402	0.137184	-0.195642	0.400631	-0.675044	0.0777621	0.209385	0.378322	0.576789	0.00319703	-0.258232	0.34596	-0.707581	0.0023139	-0.367404	0.136458
Q9NZD4	Alpha-hemoglobin-stabilizing protein	-1.07757	0.137373	1.44138	0.333187	2.51895	0.137736	-0.0699884	0.928676	-0.588213	0.325299	0.214163	0.581043	1.36089	0.105467	0.518224	0.547956
P58499	Protein FAM3B	-0.984517	0.137816	0.17433	0.879083	1.15885	0.334999	-0.289209	0.722497	-0.493038	0.430081	-0.702017	0.470267	0.939222	0.381046	0.203829	0.755899
P05787	Keratin, type II cytoskeletal 8	-0.966329	0.138282	0.555345	0.631071	1.52167	0.225288	-0.357659	0.616568	0.496161	0.534865	-1.35411	0.155677	-0.168571	0.839156	-0.853821	0.268626
P62495	Eukaryotic peptide chain release factor subunit 1	0.246735	0.138312	-0.101149	0.63662	-0.347883	0.196887	0.107582	0.468563	0.409819	0.00110444	-0.189113	0.0805033	-0.510992	0.0611739	-0.302237	0.0270158
P05141	ADP/ATP translocase 2	0.511433	0.138506	-0.127743	0.670909	-0.639177	0.171383	0.255763	0.350934	0.767574	0.0145337	-0.165835	0.0569136	-1.32684	0.0154798	-0.511811	0.107423
Q16658	Fascin	0.405541	0.138514	-0.242464	0.473233	-0.648006	0.1562	0.146339	0.531052	0.577772	0.00135832	-0.189688	0.20503	-0.844149	0.0370625	-0.431433	0.0664668
P48163	NADP-dependent malic enzyme	-0.243302	0.138853	0.093956	0.458609	0.337258	0.123653	-0.108399	0.400488	-0.328344	0.0723275	0.216354	0.248499	0.441474	0.0570363	0.219945	0.234947
O15397	Importin-8	-0.176466	0.138937	-0.207526	#DIV/0!	-0.0310603	#DIV/0!	-0.182678	0.123571	-0.243786	0.055767	0.0344686	0.731694	0.0691121	#DIV/0!	0.0611084	0.266069
Q8IVH4	Methylmalonic aciduria type A protein, mitochondrial	0.203768	0.139111	-0.145875	0.387424	-0.349643	0.0762833	0.0639104	0.638958	0.414335	0.00851435	-0.218692	0.0180611	-0.730119	0.00679816	-0.350425	0.0150868
P62826	GTP-binding nuclear protein Ran	0.247323	0.139113	-0.167557	0.252666	-0.41488	0.0597347	0.0813709	0.56836	0.468459	0.00101129	-0.132814	0.0719768	-0.751625	0.0286647	-0.387088	0.00917842
P11717	Cation-independent mannose-6-phosphate receptor	0.164508	0.139843	0.120627	0.50269	-0.0438818	0.750541	0.146956	0.12044	0.464875	0.000331685	-0.269013	0.0731555	-0.435918	0.05768	-0.31792	0.013614
Q01629	Interferon-induced transmembrane protein 2	0.350299	0.140114	-0.202347	0.478249	-0.552646	0.148078	0.12924	0.526858	0.715664	0.00127805	-0.375386	0.0145234	-0.979081	0.0560516	-0.586424	0.0161153
O14732	Inositol monophosphatase 2	0.320838	0.140225	0.109786	0.640088	-0.211053	0.484033	0.236417	0.186532	0.0784735	0.695396	0.403673	0.138926	-0.0465013	0.865161	0.157944	0.424441
Q12965	Unconventional myosin-Ie	0.329402	0.14078	-0.108124	0.635765	-0.437526	0.197699	0.154392	0.386464	0.523774	0.000540047	-0.228018	0.145518	-0.663311	0.0179332	-0.369382	0.0393968
P63104	14-3-3 protein zeta/delta	0.303113	0.141012	-0.169467	0.353553	-0.47258	0.090801	0.114081	0.505689	0.238541	0.122033	0.110687	0.952998	-0.37737	0.2941	-0.12446	0.452001
Q6PID8	Kelch domain-containing protein 10	0.224848	0.141144	0.0936315	0.744675	-0.131216	0.747566	0.172361	0.255741	-0.0979687	0.563478	0.288074	0.0500021	0.377175	0.392884	0.27033	0.144826
Q9H492	Microtubule-associated proteins 1A/1B light chain 3A	-0.344422	0.141178	0.0874629	0.828365	0.431885	0.332397	-0.0852911	0.751433	-0.651459	0.0114189	0.341536	0.21019	0.973789	0.110279	0.566168	0.0667849
P51665	26S proteasome non-ATPase regulatory subunit 7	0.199718	0.141317	-0.386148	#DIV/0!	-0.585865	#DIV/0!	0.0825445	0.62208	0.465449	0.00121096	-0.250145	0.105154	-0.867183	#DIV/0!	-0.382904	0.0445783
P46060	Ran GTPase-activating protein 1	0.344865	0.141409	-0.215381	0.260387	-0.560246	0.109545	0.120767	0.493784	0.395699	0.00110349	-0.0879923	0.207955	-0.604066	0.00417734	-0.274932	0.129076
P35637	RNA-binding protein FUS	0.26201	0.141884	-0.111635	0.346689	-0.373645	0.0926981	0.112552	0.438964	0.382415	0.00810207	-0.0889898	0.423895	-0.54891	0.053484	-0.269862	0.0469163
Q8IVD9	NudC domain-containing protein 3	-0.325408	0.141974	-0.155345	#DIV/0!	0.170063	#DIV/0!	-0.291395	0.161609	-0.251488	0.204938	0.0120117	0.493306	0.0102122	#DIV/0!	-0.039907	0.755501
Q6JBY9	CapZ-interacting protein	-0.342353	0.142113	-0.0835632	0.612256	0.25879	0.58207	-0.238837	0.147469	0.160024	0.326236	-0.293985	0.534881	-0.380645	0.193091	-0.398861	0.0357588
P16870	Carboxypeptidase E	-0.962406	0.142921	0.255413	0.833971	1.21782	0.343959	-0.231715	0.783408	-0.781388	0.2185	-0.277819	0.580903	1.19918	0.504091	0.549674	0.433062
Q6PKG0	La-related protein 1	0.325702	0.143099	0.0887784	0.721985	-0.236924	0.275905	0.230933	0.230041	0.607239	0.00223952	-0.260439	0.0325888	-0.616286	0.0423289	-0.376306	0.0224848
P68104	Elongation factor 1-alpha 1	0.368914	0.143129	-0.140151	0.655439	-0.509066	0.278487	0.165288	0.42403	0.443507	0.0024065	-0.0575499	0.273036	-0.600803	0.0564942	-0.278219	0.171768
P49447	Transmembrane ascorbate-dependent reductase CYB561	-1.10768	0.143223	0.249498	0.850055	1.35718	0.328831	-0.293372	0.754166	-0.927438	0.223053	-0.514438	0.536014	1.51985	0.461497	0.634066	0.423976
P49747	Cartilage oligomeric matrix protein	-0.422857	0.143412	0.108829	0.636676	0.531686	0.00480681	-0.210182	0.413221	-0.946712	0.00154001	0.54783	0.188974	1.20917	0.00562996	0.73653	0.00166385
Q9NQ55	Suppressor of SWI4 1 homolog	0.892769	0.143667	-0.71517	0.500226	-1.60794	0.211399	0.249593	0.67868	0.945219	0.023762	-0.316752	0.408068	-1.64016	0.165748	-0.695626	0.227099
Q9NTJ4	Alpha-mannosidase 2C1	-0.205659	0.144272	0.0388656	0.759983	0.244525	0.286992	-0.107849	0.314389	-0.131903	0.17435	0.00945182	0.491001	0.125891	0.145716	0.0240536	0.831477
Q6ZVX7	F-box only protein 50	0.490259	0.144691	-0.410981	0.0517376	-0.90124	0.03044	0.129763	0.627387	-0.569724	0.0571989	1.16365	0.0439945	0.281757	0.509187	0.699487	0.0423967
Q13190	Syntaxin-5	0.157284	0.145334	0.0853265	0.684134	-0.0719572	0.818611	0.128501	0.249263	0.396968	0.0046845	-0.202358	0.181526	-0.398464	0.0848372	-0.268467	0.0455877
P61313	60S ribosomal protein L15	0.354757	0.145349	-0.0151333	0.945312	-0.369891	0.0531305	0.206801	0.360032	0.501298	0.040278	-0.0279313	0.957949	-0.700206	0.0273899	-0.294497	0.0674954
Q9Y314	Nitric oxide synthase-interacting protein	0.324392	0.14553	-0.223842	0.455863	-0.548234	0.179617	0.105099	0.574938	0.489142	0.000411726	-0.263495	0.154856	-0.665969	0.0517477	-0.384043	0.0618733
Q8N4F0	BPI fold-containing family B member 2	-1.63869	0.145976	1.47151	0.519607	3.1102	0.218136	-0.39461	0.762254	-0.68339	0.525878	-0.813087	0.410801	1.96751	0.273189	0.28878	0.794368
Q13442	28 kDa heat- and acid-stable phosphoprotein	0.226623	0.146516	-0.0410545	0.768506	-0.267678	0.0814315	0.119552	0.40586	0.168873	0.215019	0.104277	0.408816	-0.250912	0.17254	-0.0493214	0.560322
P98175	RNA-binding protein 10	-0.418937	0.146525	0.205134	0.617075	0.624071	0.264273	-0.169308	0.526523	-0.244359	0.263318	-0.182359	0.574743	0.451008	0.494766	0.0750505	0.759748
Q8N2S1	Latent-transforming growth factor beta-binding protein 4	-0.287015	0.147001	-0.00220507	0.99496	0.28481	0.486247	-0.173091	0.380891	-0.362874	0.158044	0.136318	0.587305	0.45266	0.195679	0.189783	0.461122
P62266	40S ribosomal protein S23	0.491176	0.147059	-0.155153	0.589049	-0.646329	0.0147944	0.232645	0.461749	0.69774	0.0293181	-0.145869	0.757343	-0.972242	0.0036175	-0.465095	0.0174422
Q9NY93	Probable ATP-dependent RNA helicase DDX56	0.364448	0.147089	0.0700823	0.835302	-0.294366	0.420426	0.246702	0.230553	0.446383	0.00681599	-0.277236	0.322187	-0.158328	0.610791	-0.199681	0.316495
Q9UHR6	Zinc finger HIT domain-containing protein 2	0.143967	0.147188	0.0675178	0.719148	-0.0764492	0.635783	0.113387	0.285437	0.260116	0.0199986	-0.0472425	0.606282	-0.242856	0.0573665	-0.146729	0.130533
P46783	40S ribosomal protein S10	0.250325	0.147279	0.0282946	0.851917	-0.222031	0.232801	0.161513	0.292683	0.363156	0.0334857	-0.0377113	0.436134	-0.330711	0.237678	-0.201643	0.105399
O14617	AP-3 complex subunit delta-1	0.187264	0.147287	0.0208986	0.906866	-0.166365	0.269719	0.120718	0.268081	0.404753	0.000549041	-0.209297	0.32374	-0.460154	0.028173	-0.284035	0.0230206
A6NIH7	Protein unc-119 homolog B	-0.333951	0.147511	0.0998367	0.374789	0.433788	0.13267	-0.0736785	0.630995	0.265654	0.0467998	-0.651319	0.0851847	-0.0654945	0.223278	-0.339333	0.0425299
Q03519	Antigen peptide transporter 2	0.385799	0.14757	-0.242866	0.366647	-0.628664	0.0433203	0.134333	0.590487	0.925503	0.00149925	-0.633625	0.00723149	-1.18497	0.000841843	-0.79117	0.00236742
Q9Y3E1	Hepatoma-derived growth factor-related protein 3	-0.251499	0.147625	-0.0746397	0.78411	0.17686	0.612152	-0.180756	0.315825	-0.225371	0.259043	0.0579161	0.617614	0.0684009	0.719357	0.0446152	0.778182
P49418	Amphiphysin	-0.281446	0.147989	0.206339	0.28658	0.487786	0.0967026	-0.0863321	0.599235	-0.200511	0.260756	-0.0264963	0.638582	0.451938	0.103755	0.114179	0.560732
Q53GS9	U4/U6.U5 tri-snRNP-associated protein 2	0.198064	0.148272	-0.0887005	0.435737	-0.286765	0.127936	0.0833584	0.434477	0.337391	0.00147878	-0.193295	0.0891958	-0.469551	0.00171569	-0.254033	0.0308938
O75822	Eukaryotic translation initiation factor 3 subunit J	0.141852	0.148328	0.0363375	0.854328	-0.105514	0.443846	0.0996461	0.306693	0.11075	0.0970725	0.0446129	0.079452	-0.0999506	0.633572	-0.0111043	0.901947
Q12996	Cleavage stimulation factor subunit 3	0.291212	0.14848	-0.274097	0.186161	-0.56531	0.0741665	0.0650886	0.701759	0.365245	0.0120236	-0.0914486	0.0452107	-0.779319	0.0105783	-0.300156	0.103388
P30043	Flavin reductase (NADPH)	-0.379934	0.14876	0.263789	0.284919	0.643723	0.0724656	-0.122445	0.596174	-0.27997	0.235533	0.209402	0.0368863	0.300417	0.317988	0.157526	0.506866
Q8IVF7	Formin-like protein 3	0.391846	0.148972	-0.895462	#DIV/0!	-1.28731	#DIV/0!	0.134385	0.710312	0.679375	0.160828	-0.424881	0.664839	-1.43748	#DIV/0!	-0.54499	0.262402
Q6EMK4	Vasorin	-0.232455	0.149113	0.0815238	0.761471	0.313979	0.281545	-0.0440676	0.819117	0.0446226	0.773471	-0.269751	0.134808	0.142389	0.98506	-0.0886903	0.615078
Q9Y2E4	Disco-interacting protein 2 homolog C	0.324021	0.149267	0.521871	0.304628	0.19785	0.655074	0.442731	0.153657	0.128194	0.563655	0.215457	0.540542	0.276564	0.733426	0.314537	0.238116
Q9HC84	Mucin-5B	-1.72556	0.149357	1.45088	0.509412	3.17645	0.203897	-0.454984	0.728056	-0.530258	0.631503	-1.00054	0.360989	1.91033	0.244143	0.0752745	0.947948
Q9H3H5	UDP-N-acetylglucosamine--dolichyl-phosphate N-acetylglucosaminephosphotransferase	0.389235	0.149359	-0.0936844	0.742929	-0.48292	0.14121	0.196067	0.362312	0.608276	0.0104622	-0.139372	0.85637	-0.929375	0.0214265	-0.412209	0.10612
O15372	Eukaryotic translation initiation factor 3 subunit H	0.160956	0.149545	-0.0647462	0.586805	-0.225702	0.129175	0.0706749	0.438115	0.33579	0.00636526	-0.149984	0.282884	-0.419065	0.00406297	-0.265115	0.0361172
Q9HCN4	GPN-loop GTPase 1	-0.157976	0.149551	0.188955	0.117131	0.346931	0.0133213	0.0501824	0.700489	0.173889	0.196761	-0.246342	0.309786	0.0573264	0.752575	-0.123706	0.355222
Q14160	Protein scribble homolog	0.21321	0.1497	-0.194693	0.500079	-0.407903	0.212196	0.0500492	0.743964	0.159882	0.187489	0.0594283	0.744297	-0.38485	0.160991	-0.109833	0.497255
P83731	60S ribosomal protein L24	0.354878	0.149784	-0.0710857	0.768146	-0.425963	0.215251	0.184492	0.361228	0.530997	0.00425862	-0.173254	0.222767	-0.697585	0.0259799	-0.346505	0.0616948
Q5T8P6	RNA-binding protein 26	-0.732989	0.150112	-1.79614	#DIV/0!	-1.06315	#DIV/0!	-0.945619	0.0891917	-0.244832	0.762181	0.0401196	0.641288	-2.07958	#DIV/0!	-0.700787	0.35949
Q14997	Proteasome activator complex subunit 4	0.362741	0.150285	-0.0458937	#DIV/0!	-0.408635	#DIV/0!	0.281014	0.267393	0.527004	0.0550621	-0.160935	0.655947	-0.576225	#DIV/0!	-0.24599	0.0592563
O75381	Peroxisomal membrane protein PEX14	-0.146446	0.150339	0.0230163	0.778675	0.169463	0.150662	-0.0786613	0.366162	0.0322019	0.729453	-0.0759729	0.715034	-0.114089	0.391635	-0.110863	0.177896
Q12907	Vesicular integral-membrane protein VIP36	-0.272585	0.150409	0.208583	0.600012	0.481167	0.334603	-0.0801176	0.710893	0.481686	0.022274	-0.615652	0.0462669	-0.481324	0.0683041	-0.561804	0.0158681
P40429	60S ribosomal protein L13a	0.4247	0.150456	0.0492515	0.859151	-0.375449	0.270319	0.274521	0.266693	0.624255	0.0142895	-0.126203	0.319271	-0.803574	0.0120355	-0.349734	0.104633
Q6DKJ4	Nucleoredoxin	0.127889	0.150563	0.0389893	0.813739	-0.0888994	0.673443	0.0923289	0.329687	0.267191	0.00495438	-0.111201	0.0872613	-0.272823	0.178716	-0.174862	0.030475
O94842	TOX high mobility group box family member 4	0.208501	0.150994	-0.246493	#DIV/0!	-0.454995	#DIV/0!	0.117502	0.469086	0.441761	0.00962934	-0.28099	0.0569278	-0.640523	#DIV/0!	-0.324258	0.0283653
P60468	Protein transport protein Sec61 subunit beta	0.235782	0.152083	0.0626452	0.776398	-0.173137	0.356526	0.166527	0.297681	0.622121	0.00295502	-0.230687	0.393759	-0.776049	0.0464688	-0.455594	0.00946504
Q96RP9	Elongation factor G, mitochondrial	0.25713	0.152562	-0.181611	0.212128	-0.438741	0.0581162	0.0816338	0.576919	0.47419	0.0060616	-0.144647	0.309189	-0.906508	0.0020227	-0.392557	0.0312442
Q15493	Regucalcin	-0.277742	0.153361	0.148596	0.554461	0.426338	0.169723	-0.0219389	0.903091	-0.163673	0.331674	0.0804218	0.984087	0.297467	0.16588	0.141734	0.52036
Q9NP72	Ras-related protein Rab-18	0.15172	0.153563	-0.108275	0.194801	-0.259996	0.0120739	0.0477222	0.612191	0.167903	0.0961399	-0.0546493	0.771186	-0.231057	0.119496	-0.12018	0.199166
P02671	Fibrinogen alpha chain	-0.393265	0.153758	0.254918	0.515919	0.648183	0.135154	-0.133992	0.632426	-0.0350545	0.921055	-0.150643	0.802774	0.0742533	0.90419	-0.0989373	0.768413
P14868	Aspartate--tRNA ligase, cytoplasmic	0.126811	0.153769	-0.0957427	0.461114	-0.222554	0.124143	0.0377897	0.675114	0.221571	0.0118389	-0.0476242	0.520563	-0.369802	0.0705117	-0.183781	0.0280384
Q86TC9	Myopalladin	-0.552784	0.153837	-0.00765188	#DIV/0!	0.545132	#DIV/0!	-0.443757	0.212112	-1.20531	0.0102931	0.369385	0.64856	1.4808	#DIV/0!	0.761555	0.0631004
Q15118	[Pyruvate dehydrogenase (acetyl-transferring)] kinase isozyme 1, mitochondrial	-0.345823	0.154168	0.0849745	0.774585	0.430797	0.167033	-0.0873444	0.731284	0.265729	0.377688	-0.429697	0.369002	-0.471539	0.336349	-0.353073	0.22108
O75439	Mitochondrial-processing peptidase subunit beta	0.242859	0.15422	-0.208005	0.108323	-0.450865	0.0399633	0.0625135	0.675069	0.339643	0.026311	-0.0864027	0.307678	-0.736915	0.00410996	-0.277129	0.0671749
Q8IZH2	5'-3' exoribonuclease 1	0.154343	0.154618	-0.0062638	0.948222	-0.160607	0.28557	0.0901005	0.280166	0.200624	0.0120861	-0.071448	0.401572	-0.256289	0.0156207	-0.110524	0.185166
P42766	60S ribosomal protein L35	0.362577	0.154986	-0.108263	0.652491	-0.47084	0.114253	0.174241	0.432685	0.484669	0.034491	-0.0426662	0.84523	-0.855418	0.00542722	-0.310428	0.124045
Q15459	Splicing factor 3A subunit 1	0.289111	0.155107	-0.282496	0.206357	-0.571607	0.0907006	0.0604682	0.718322	0.454639	0.000563948	-0.20591	0.0295693	-0.791628	0.00337183	-0.394171	0.0363955
Q96J88	Epithelial-stromal interaction protein 1	0.772952	0.155833	-0.841997	#DIV/0!	-1.61495	#DIV/0!	0.449962	0.43399	1.34678	0.0221822	-1.11396	0.0901688	-1.64865	#DIV/0!	-0.896822	0.135358
Q96BJ3	Axin interactor, dorsalization-associated protein	-0.407922	0.155851	0.0441618	0.921738	0.452084	0.326511	-0.136672	0.681535	-0.0846376	0.77207	-0.0462178	0.197199	-0.0625306	0.730669	-0.0520343	0.855094
Q9GZZ1	N-alpha-acetyltransferase 50	0.230669	0.156377	-0.202972	0.179312	-0.433641	0.00832517	0.0572124	0.72267	0.342474	0.036075	-0.0247494	0.257433	-0.630143	0.0466011	-0.285262	0.01963
Q9BQL6	Fermitin family homolog 1	0.403217	0.156602	-0.432727	#DIV/0!	-0.835944	#DIV/0!	0.236028	0.41398	0.378932	0.0905108	-0.0144718	0.0124366	-0.772902	#DIV/0!	-0.142904	0.608398
Q08211	ATP-dependent RNA helicase A	0.293281	0.156661	-0.223541	0.280094	-0.516822	0.0946026	0.0865524	0.621241	0.451076	0.00222968	-0.178937	0.206513	-0.787402	0.00553531	-0.364523	0.0357369
P33992	DNA replication licensing factor MCM5	0.274222	0.156773	-0.0179543	0.920793	-0.292176	0.427842	0.157351	0.260652	0.303425	0.00588013	-0.0751654	0.0167501	-0.304638	0.0636323	-0.146073	0.314628
Q86U42	Polyadenylate-binding protein 2	0.267507	0.156849	-0.178113	#DIV/0!	-0.44562	#DIV/0!	0.178383	0.365599	0.303483	0.15594	-0.109862	0.372372	-0.40771	#DIV/0!	-0.1251	0.455153
P62241	40S ribosomal protein S8	0.393133	0.157007	-0.134844	0.566871	-0.527976	0.184841	0.181942	0.406088	0.439933	0.0376561	0.0105113	0.466523	-0.689817	0.084462	-0.257991	0.251522
P55039	Developmentally-regulated GTP-binding protein 2	0.245751	0.157254	0.119398	0.644612	-0.126353	0.572645	0.19521	0.185026	0.279388	0.0592621	0.0306761	0.478615	-0.157644	0.533889	-0.0841778	0.607284
Q96PE2	Rho guanine nucleotide exchange factor 17	-0.24573	0.157299	0.175503	0.503129	0.421234	0.136205	-0.0772369	0.672433	-0.248488	0.213039	0.00678806	0.971115	0.446568	0.166923	0.171251	0.341738
O95870	Phosphatidylserine lipase ABHD16A	0.190597	0.157359	-0.0867869	0.588425	-0.277384	0.11776	0.0796433	0.53612	0.276984	0.0357618	-0.0372408	0.747387	-0.532786	0.0438112	-0.19734	0.0779385
O75844	CAAX prenyl protease 1 homolog	0.266947	0.157602	-0.115771	0.572993	-0.382718	0.171721	0.11386	0.45889	0.515733	0.0019129	-0.269821	0.122792	-0.768598	0.000737054	-0.401874	0.0272584
P61966	AP-1 complex subunit sigma-1A	-0.148152	0.157624	0.0295201	0.879064	0.177672	0.420535	-0.077083	0.482114	0.0382447	0.743849	-0.105233	0.477625	-0.0505596	0.869342	-0.115328	0.338256
Q08722	Leukocyte surface antigen CD47	-0.313774	0.157892	0.0748253	0.788445	0.388599	0.23012	-0.158334	0.444295	0.03364	0.86144	-0.301675	0.09326	5.5194e-05	0.999792	-0.191974	0.277402
P55042	GTP-binding protein RAD	-0.611488	0.158317	-0.741008	0.413781	-0.12952	0.876774	-0.6892	0.192043	-0.37442	0.360223	0.316082	0.419564	-0.938631	0.671319	-0.314781	0.542696
P09455	Retinol-binding protein 1	0.777604	0.158548	-0.529463	#DIV/0!	-1.30707	#DIV/0!	0.516191	0.332154	1.32277	0.0369375	-0.0338745	0.918774	-2.36353	#DIV/0!	-0.806584	0.194947
O00391	Sulfhydryl oxidase 1	-0.260694	0.158688	0.135974	0.796564	0.396669	0.447557	-0.102027	0.674957	-0.575643	0.00316907	0.20172	0.333033	0.957408	0.19433	0.473617	0.0455931
Q14696	LRP chaperone MESD	-0.423562	0.158732	-0.215311	0.529277	0.208251	0.547263	-0.298611	0.235112	-0.0593618	0.77642	-0.271006	0.15082	-0.375402	0.137937	-0.23925	0.256111
Q9UKY7	Protein CDV3 homolog	0.247982	0.15893	-0.264024	0.15855	-0.512006	0.00520992	0.0431796	0.815212	0.368885	0.0553044	-0.0409978	0.477148	-0.629071	0.0895358	-0.325705	0.0251979
Q9ULP9	TBC1 domain family member 24	-0.193239	0.159587	0.33906	0.118239	0.532298	0.0549914	0.0196807	0.89775	0.0819113	0.532982	-0.291436	0.294343	0.234193	0.134955	-0.0622306	0.668817
Q7L8L6	FAST kinase domain-containing protein 5, mitochondrial	-0.2155	0.159626	-0.0210797	0.93035	0.19442	0.4156	-0.0988478	0.570834	0.016484	0.90928	-0.136422	0.715956	-0.191008	0.349963	-0.115332	0.420054
Q9BYK8	Helicase with zinc finger domain 2	0.41158	0.160409	0.0224162	#DIV/0!	-0.389164	#DIV/0!	0.333747	0.185477	0.856723	0.00309184	-0.650791	0.446306	-0.628659	#DIV/0!	-0.522976	0.0594817
Q9NX24	H/ACA ribonucleoprotein complex subunit 2	0.235813	0.161148	-0.115201	0.563805	-0.351015	0.133274	0.0954076	0.546342	0.0765525	0.623385	-0.0248874	0.604105	-0.10891	0.357929	0.018855	0.894068
P04921	Glycophorin-C	-0.293369	0.161205	0.213065	0.43778	0.506434	0.165699	-0.0907956	0.628981	-0.371296	0.0316304	0.183103	0.258771	0.651417	0.0358245	0.280501	0.156837
P30679	Guanine nucleotide-binding protein subunit alpha-15	0.243162	0.161348	-0.0363026	0.907122	-0.279464	0.428753	0.131376	0.427662	0.0905356	0.461914	0.204584	0.157868	-0.0974329	0.832017	0.0408403	0.799521
Q9NRX1	RNA-binding protein PNO1	0.401767	0.161537	0.0473869	0.879387	-0.35438	0.193924	0.189139	0.507655	0.0818811	0.755835	0.312703	0.343795	0.0115913	0.973152	0.107258	0.527718
O14773	Tripeptidyl-peptidase 1	-0.351473	0.161554	-0.0413902	0.908122	0.310082	0.552894	-0.22744	0.328802	-0.21075	0.299458	0.092247	0.298036	0.024873	0.943436	-0.0166893	0.930211
P35858	Insulin-like growth factor-binding protein complex acid labile subunit	-0.288401	0.161915	0.255144	#DIV/0!	0.543545	#DIV/0!	-0.179692	0.384002	-0.283034	0.136503	0.0344741	0.435929	0.498337	#DIV/0!	0.103342	0.612638
Q6ZUX3	TOG array regulator of axonemal microtubules protein 2	0.505756	0.162111	-0.434645	#DIV/0!	-0.940402	#DIV/0!	0.317676	0.41035	0.688164	0.164828	-0.159207	0.287314	-1.14601	#DIV/0!	-0.370488	0.383643
P46778	60S ribosomal protein L21	0.341971	0.16229	-0.0167114	0.938415	-0.358682	0.218376	0.198498	0.325493	0.491038	0.0175999	-0.0833799	0.458889	-0.654332	0.0780853	-0.29254	0.110041
O75179	Ankyrin repeat domain-containing protein 17	0.142444	0.162323	0.0310903	0.754383	-0.111353	0.265178	0.0979022	0.245906	0.233096	0.0158973	-0.0385729	0.928912	-0.218355	0.0399237	-0.135194	0.115991
P36639	Oxidized purine nucleoside triphosphate hydrolase	-0.319416	0.162643	-0.267657	0.264681	0.051759	0.705167	-0.298712	0.161647	-0.279815	0.212218	0.174794	0.42163	-0.118437	0.661147	-0.018897	0.893816
Q9P270	SLAIN motif-containing protein 2	0.146673	0.16347	-0.0525792	0.837166	-0.199252	0.525676	0.0669719	0.589914	0.249112	0.0167479	-0.0735202	0.355387	-0.321401	0.243458	-0.18214	0.131442
P06730	Eukaryotic translation initiation factor 4E	0.209029	0.163667	-0.144944	0.3567	-0.353972	0.0338258	0.0674398	0.6489	0.243192	0.0973012	0.090932	0.606667	-0.46605	0.0630461	-0.175752	0.102236
Q9UQ35	Serine/arginine repetitive matrix protein 2	0.240173	0.163872	-0.172579	0.28963	-0.412753	0.125995	0.0750722	0.577729	0.353335	0.00164048	-0.137939	0.141578	-0.575693	0.00576916	-0.278262	0.0601463
P13984	General transcription factor IIF subunit 2	0.255139	0.164035	-0.393785	#DIV/0!	-0.648924	#DIV/0!	0.125354	0.556672	0.308856	0.118433	0.0463977	0.971821	-0.802756	#DIV/0!	-0.183502	0.332663
Q8WXI9	Transcriptional repressor p66-beta	0.203782	0.164374	-0.127367	0.222507	-0.331148	0.102885	0.0713223	0.503774	0.199449	0.0111218	0.0051149	0.372089	-0.383421	0.0487561	-0.128127	0.25442
P09132	Signal recognition particle 19 kDa protein	0.189508	0.164436	0.0033426	0.988013	-0.186165	0.421503	0.115042	0.412242	0.531123	0.000745664	-0.286938	0.128049	-0.577218	0.0369583	-0.416082	0.0017325
Q96RT1	Erbin	0.126283	0.164552	0.200789	0.163879	0.0745058	0.529998	0.170987	0.0927774	0.269724	0.0174477	-0.0925095	0.467035	-0.0509496	0.800092	-0.098737	0.266273
Q13586	Stromal interaction molecule 1	0.167703	0.164615	-0.119715	0.201999	-0.287418	0.0219916	0.052736	0.573489	0.195506	0.0105526	-0.0954461	0.711327	-0.302209	0.0430431	-0.14277	0.139029
P57764	Gasdermin-D	-0.300988	0.164722	-0.116857	0.615048	0.184131	0.29552	-0.19051	0.370777	0.256091	0.276476	-0.514843	0.316296	-0.260212	0.278218	-0.446601	0.019248
Q9Y305	Acyl-coenzyme A thioesterase 9, mitochondrial	0.257836	0.164877	0.0488365	0.65339	-0.208999	0.283049	0.174236	0.187443	0.563876	0.00188489	-0.295047	0.00139604	-0.686858	0.0498811	-0.38964	0.0241167
P12429	Annexin A3	-0.314117	0.165212	0.456436	0.3466	0.770553	0.13113	-0.00589551	0.983457	0.395095	0.277013	-0.804718	0.141154	-0.0436668	0.939435	-0.40099	0.262383
Q92785	Zinc finger protein ubi-d4	0.234363	0.165713	-0.0892143	#DIV/0!	-0.323577	#DIV/0!	0.169647	0.237305	0.169745	0.151884	0.205303	0.220101	-0.399644	#DIV/0!	-9.7369e-05	0.999494
Q15847	Adipogenesis regulatory factor	-0.56956	0.166095	-0.148716	0.81755	0.420845	0.63956	-0.401222	0.258135	-0.784236	0.0367965	0.507601	0.0758449	0.653168	0.182437	0.383014	0.364223
Q14894	Ketimine reductase mu-crystallin	-1.46379	0.166556	0.604761	0.693619	2.06855	0.22647	-0.222661	0.847369	-1.46744	0.131339	-0.492865	0.580527	2.51268	0.362288	1.24478	0.241863
Q9NX76	CKLF-like MARVEL transmembrane domain-containing protein 6	0.332544	0.166811	0.0726343	0.831729	-0.25991	0.459977	0.22858	0.313846	0.703979	0.00274975	-0.294337	0.0156845	-0.700832	0.0176006	-0.475399	0.0167353
Q16610	Extracellular matrix protein 1	-0.422542	0.166965	-0.331144	0.224115	0.0913981	0.716569	-0.385983	0.0956624	-0.715411	0.00752778	0.363273	0.297763	0.456964	0.327953	0.329428	0.179409
P20963	T-cell surface glycoprotein CD3 zeta chain	-0.496188	0.167062	-0.451089	#DIV/0!	0.0450993	#DIV/0!	-0.487168	0.117412	-0.24418	0.467958	-0.231847	0.594006	-0.22707	#DIV/0!	-0.242988	0.453538
P48643	T-complex protein 1 subunit epsilon	0.182484	0.167532	-0.077518	0.560488	-0.260002	0.142778	0.0784829	0.479828	0.421208	0.000160223	-0.265361	0.0234833	-0.541585	0.00194958	-0.342725	0.00260396
Q93034	Cullin-5	0.139544	0.167843	0.106782	0.342023	-0.0327622	0.82034	0.12644	0.171439	0.183077	0.0529427	-0.00464809	0.810495	-0.177774	0.21822	-0.0566374	0.36054
Q96N67	Dedicator of cytokinesis protein 7	0.198758	0.168779	-0.0215547	0.926577	-0.220313	0.375777	0.110633	0.445982	0.418635	0.00591901	-0.221672	0.0101449	-0.543235	0.025319	-0.308002	0.0255903
O75976	Carboxypeptidase D	-0.822564	0.16881	0.134094	0.907212	0.956658	0.417218	-0.248569	0.748575	-0.678948	0.262423	-0.364201	0.461244	1.17553	0.508647	0.430379	0.517056
P82914	28S ribosomal protein S15, mitochondrial	0.276887	0.168916	0.24781	#DIV/0!	-0.029077	#DIV/0!	0.271071	0.102498	0.418151	0.0530209	-0.151762	0.436867	-0.159843	#DIV/0!	-0.147079	0.451028
P62899	60S ribosomal protein L31	0.289362	0.169033	-0.0038613	0.98916	-0.293224	0.293249	0.172073	0.391115	0.35958	0.0553317	0.00823774	0.848207	-0.364577	0.404111	-0.187507	0.210013
P05161	Ubiquitin-like protein ISG15	1.22643	0.16906	-0.335914	#DIV/0!	-1.56234	#DIV/0!	0.913961	0.263257	2.20122	0.00827813	-1.63717	0.462494	-1.87476	#DIV/0!	-1.28726	0.10756
Q14512	Fibroblast growth factor-binding protein 1	-0.356406	0.169243	-0.0689784	0.775256	0.287427	0.587136	-0.241435	0.201415	-0.260834	0.215413	-0.134457	0.908795	0.425715	0.198687	0.0193993	0.933689
P63218	Guanine nucleotide-binding protein G(I)/G(S)/G(O) subunit gamma-5	0.20445	0.169419	-0.000268419	0.999226	-0.204719	0.583271	0.122563	0.406949	0.400911	0.00479457	-0.108049	0.424661	-0.46446	0.148202	-0.278348	0.070781
Q13838	Spliceosome RNA helicase DDX39B	0.331005	0.16948	-0.146904	0.442169	-0.477909	0.154978	0.139842	0.460823	0.445727	0.00506466	-0.186373	0.188607	-0.613746	0.0148219	-0.305885	0.0773012
Q8NBJ7	Inactive C-alpha-formylglycine-generating enzyme 2	-0.246885	0.169708	0.00407127	0.987738	0.250957	0.466568	-0.146503	0.387874	0.159918	0.331006	-0.226964	0.455573	-0.289218	0.126205	-0.306421	0.0651144
O00488	Zinc finger protein 593	0.210239	0.16999	-0.426791	#DIV/0!	-0.637029	#DIV/0!	0.0828328	0.665292	0.191899	0.351388	-0.212091	0.412947	-0.388259	#DIV/0!	-0.109066	0.585049
P51159	Ras-related protein Rab-27A	-0.396537	0.170095	0.24871	0.702642	0.645248	0.353165	-0.00938875	0.98235	0.28002	0.335557	-0.517856	0.249976	-0.337901	0.883746	-0.289409	0.454012
P16150	Leukosialin	0.5708	0.170211	0.479403	0.524665	-0.0913972	0.890284	0.515961	0.303378	1.18732	0.0336632	-0.293464	0.761204	-0.719771	0.0579264	-0.671355	0.17685
P09382	Galectin-1	-0.5526	0.1703	0.440869	0.269828	0.993468	0.079435	-0.155212	0.654152	-0.277676	0.350064	0.0729935	0.634418	0.564162	0.0790834	0.122463	0.711311
Q3ZCW2	Galectin-related protein	0.457686	0.170411	-0.12558	0.791493	-0.583267	0.325129	0.224379	0.485192	-0.495992	0.224272	0.751926	0.120451	1.01623	0.193725	0.720371	0.0757695
Q9H7E9	UPF0488 protein C8orf33	-0.150064	0.170618	-0.217225	0.0470832	-0.0671609	0.442356	-0.19036	0.0577647	0.00513028	0.964917	-0.0664387	0.515595	-0.411847	0.0099513	-0.195491	0.0793759
Q8NDH3	Probable aminopeptidase NPEPL1	-0.236315	0.170618	-0.257367	0.0932197	-0.0210512	0.53054	-0.244736	0.0857011	-0.322215	0.0256955	0.134351	0.852507	0.00120975	0.9924	0.0774792	0.465743
P53365	Arfaptin-2	-0.399502	0.170961	0.152266	0.693286	0.551767	0.17864	-0.0684413	0.832524	-0.192874	0.528994	-0.214678	0.610142	0.478556	0.047839	0.124433	0.649062
Q8N4X5	Actin filament-associated protein 1-like 2	0.245783	0.171064	-0.158628	0.385513	-0.40441	0.0629962	0.0840187	0.581692	0.314801	0.0399349	-0.23354	0.234352	-0.359587	0.124193	-0.230782	0.155705
P05549	Transcription factor AP-2-alpha	0.34546	0.171422	-0.23877	0.512711	-0.58423	0.259819	0.111768	0.6272	0.213922	0.217174	-0.00950288	0.289944	-0.23689	0.492974	-0.102154	0.640452
Q96DU7	Inositol-trisphosphate 3-kinase C	0.33276	0.171422	-0.274982	0.254073	-0.607743	0.0966977	0.0896633	0.661372	0.0285336	0.84387	0.406609	0.0518113	-0.416664	0.25757	0.0611297	0.739744
Q13867	Bleomycin hydrolase	0.306692	0.171479	0.467735	0.118939	0.161044	0.394883	0.371109	0.030109	-0.096542	0.41685	0.43882	0.183366	0.674026	0.0372114	0.467651	0.012459
Q8N5A5	Zinc finger CCCH-type with G patch domain-containing protein	0.214805	0.171618	-0.0666334	0.714297	-0.281439	0.156116	0.10223	0.484447	0.387916	0.00818258	-0.0768836	0.39705	-0.528276	0.0384304	-0.285686	0.016712
Q9UP95	Solute carrier family 12 member 4	0.436506	0.171744	-0.172103	0.817349	-0.608609	0.439374	0.193062	0.566947	0.721323	0.00882187	-0.35715	0.491088	-1.07832	0.101908	-0.528261	0.173036
Q13641	Trophoblast glycoprotein	0.309296	0.171745	0.208523	0.585168	-0.100773	0.989712	0.268986	0.209468	0.424415	0.110056	-0.0272538	0.786297	-0.234224	0.377013	-0.155428	0.551745
Q6UN15	Pre-mRNA 3'-end-processing factor FIP1	0.278869	0.171885	-0.100071	0.628519	-0.378941	0.25795	0.127293	0.439549	0.400823	0.00321464	-0.122655	0.0908312	-0.582668	0.0171303	-0.27353	0.0757684
Q16514	Transcription initiation factor TFIID subunit 12	-0.143383	0.171976	-0.256499	0.0815825	-0.113116	0.369683	-0.211253	0.0263038	0.15359	0.134501	-0.23813	0.00303203	-0.35624	0.0933699	-0.364843	0.00506149
O94886	CSC1-like protein 1	-0.46629	0.17227	0.15736	0.709412	0.62365	0.163583	-0.0920996	0.7981	-0.374396	0.264823	-0.194788	0.616659	0.638192	0.353639	0.282296	0.341179
P31483	Cytotoxic granule associated RNA binding protein TIA1	0.190675	0.172315	0.0439254	0.712462	-0.14675	0.396488	0.131975	0.275458	0.179471	0.144434	0.0305596	0.799751	-0.188807	0.110871	-0.0474957	0.580799
P78332	RNA-binding protein 6	0.332625	0.172373	0.0298948	0.931829	-0.30273	0.460308	0.211533	0.293606	0.462125	0.00239109	-0.119981	0.643071	-0.5591	0.0423593	-0.250592	0.213818
Q96C24	Synaptotagmin-like protein 4	-0.68339	0.172433	0.33151	0.663925	1.0149	0.21972	-0.07445	0.900229	-0.482123	0.324965	-0.315467	0.327388	0.778102	0.584081	0.407673	0.390193
Q4G176	Malonate--CoA ligase ACSF3, mitochondrial	0.208985	0.172466	0.0221542	0.89358	-0.186831	0.0989682	0.134252	0.337841	0.435929	0.00562912	-0.188362	0.267312	-0.57822	0.0481295	-0.301677	0.0115766
O15511	Actin-related protein 2/3 complex subunit 5	0.237142	0.172598	-0.165867	0.515437	-0.403008	0.217102	0.0759384	0.658896	0.438427	0.00589929	-0.191091	0.0360261	-0.563888	0.143933	-0.362489	0.0199275
P19652	Alpha-1-acid glycoprotein 2	-0.886099	0.172772	0.299183	0.591973	1.18528	0.18378	-0.411986	0.429467	-0.79227	0.121763	0.330398	0.33314	1.05433	0.120588	0.380284	0.467394
Q5VUA4	Zinc finger protein 318	0.43595	0.172863	0.137338	0.795635	-0.298612	0.548535	0.256783	0.491161	0.37613	0.238473	0.120541	0.267353	-0.304377	0.675319	-0.119347	0.666492
Q9NR50	Translation initiation factor eIF-2B subunit gamma	0.133514	0.173067	0.0295113	0.792137	-0.104002	0.285683	0.0919126	0.280518	0.239611	0.0114872	-0.0822455	0.631777	-0.284375	0.000578426	-0.147698	0.0758629
Q9Y5S9	RNA-binding protein 8A	0.309461	0.173111	-0.212591	0.301309	-0.522053	0.108091	0.10064	0.587272	0.449401	0.00724693	-0.144874	0.264927	-0.744738	0.0114753	-0.34876	0.0661278
P48739	Phosphatidylinositol transfer protein beta isoform	0.251658	0.173149	-0.217616	0.34469	-0.469273	0.16212	0.0639482	0.675735	0.309263	0.00925273	-0.0238311	0.283345	-0.630816	0.0374919	-0.245315	0.148097
O95573	Fatty acid CoA ligase Acsl3	-0.278808	0.173157	0.076644	0.760085	0.355452	0.39217	-0.136627	0.424985	-0.0729531	0.57844	-0.292489	0.084018	0.128519	0.702109	-0.0636744	0.69084
P08238	Heat shock protein HSP 90-beta	0.240847	0.173629	-0.129621	0.411857	-0.370467	0.0772673	0.0926597	0.506713	0.484613	0.000240418	-0.246824	0.0578842	-0.677029	0.0191416	-0.391954	0.00968857
P11233	Ras-related protein Ral-A	0.182738	0.174082	0.160472	0.0400527	-0.022266	0.879516	0.173832	0.0644292	0.162002	0.122636	-0.0980061	0.241886	0.107165	0.235221	0.0118304	0.906936
P62244	40S ribosomal protein S15a	0.311737	0.174137	-0.0181223	0.907816	-0.329859	0.218951	0.179793	0.334611	0.462102	0.019401	-0.138279	0.171052	-0.502556	0.187808	-0.282309	0.0810726
O43818	U3 small nucleolar RNA-interacting protein 2	0.37229	0.17475	-0.157076	0.45836	-0.529366	0.079588	0.160544	0.456853	0.386626	0.0553285	-0.180775	0.591977	-0.485512	0.0259506	-0.226082	0.286148
O15498	Synaptobrevin homolog YKT6	0.170064	0.174869	0.0186055	0.916002	-0.151459	0.447914	0.109481	0.317185	0.481001	0.000820122	-0.232233	0.217483	-0.498272	0.0728723	-0.37152	0.00895758
Q9Y276	Mitochondrial chaperone BCS1	0.244104	0.175301	0.148893	0.615045	-0.0952116	0.481003	0.20602	0.247858	0.146065	0.359726	0.0767632	0.00544372	-0.112677	0.634006	0.0599549	0.662418
Q96DM3	Regulator of MON1-CCZ1 complex	0.225679	0.175454	-0.0427041	#DIV/0!	-0.268383	#DIV/0!	0.172002	0.304981	0.0906345	0.584791	0.136646	0.568408	-0.134941	#DIV/0!	0.0813675	0.388716
Q99538	Legumain	-0.26376	0.175488	-0.0490617	0.79367	0.214698	0.379064	-0.17788	0.312707	0.275079	0.183027	-0.28422	0.0102263	-0.439922	0.233257	-0.45296	0.0106387
Q8WXX5	DnaJ homolog subfamily C member 9	0.342246	0.175512	-0.107355	0.724432	-0.449601	0.219838	0.162405	0.428549	0.725489	5.92652e-05	-0.438143	0.051604	-0.809455	0.0363094	-0.563084	0.011235
Q8IXK2	Polypeptide N-acetylgalactosaminyltransferase 12	-1.25006	0.175551	-0.0657833	0.962519	1.18427	0.385561	-0.539492	0.605745	-0.912549	0.343579	-0.84459	0.509384	1.4943	0.537081	0.373057	0.660049
P06703	Protein S100-A6	-0.257738	0.175598	0.0234354	0.927932	0.281174	0.331842	-0.145269	0.407613	-0.295423	0.129413	0.0631631	0.71936	0.5342	0.0494854	0.150154	0.417662
Q14790	Caspase-8	0.186926	0.175614	-0.151243	0.571924	-0.338169	0.269269	0.0516582	0.720603	0.417526	0.00191295	-0.139631	0.423265	-0.630868	0.0149854	-0.365868	0.0209259
Q6UB99	Ankyrin repeat domain-containing protein 11	-0.65802	0.175894	-1.40466	#DIV/0!	-0.746642	#DIV/0!	-0.807348	0.114959	-0.990552	0.0595583	0.327078	0.620399	-0.408655	#DIV/0!	0.183204	0.421405
O95967	EGF-containing fibulin-like extracellular matrix protein 2	0.220232	0.176154	0.390441	0.0370472	0.170209	0.211775	0.322357	0.0568713	-0.102069	0.535564	0.445499	0.247531	0.516363	0.268305	0.424426	0.00733794
O60343	TBC1 domain family member 4	-0.172112	0.176218	0.187235	0.178077	0.359348	0.0768228	-0.0283734	0.796207	-0.0686456	0.372799	-0.0469414	0.865356	0.174715	0.318624	0.0402722	0.702058
P84157	Matrix-remodeling-associated protein 7	-0.244563	0.176303	0.125859	0.58213	0.370422	0.0926745	-0.0963942	0.579014	-0.539603	0.00423199	0.3288	0.113399	0.750032	0.00373753	0.443209	0.00810308
P49790	Nuclear pore complex protein Nup153	0.437816	0.176609	-0.213533	0.534101	-0.651349	0.176985	0.177276	0.46346	0.677401	0.000613977	-0.406108	0.173115	-0.904986	0.00864881	-0.500124	0.0713935
P07237	Protein disulfide-isomerase	-0.198223	0.176745	0.0599707	0.86518	0.258193	0.490497	-0.0949453	0.595469	0.390031	0.0620978	-0.503371	0.179151	-0.478341	0.166964	-0.484976	0.025597
Q14690	Protein RRP5 homolog	0.514772	0.176861	0.2117	#DIV/0!	-0.303072	#DIV/0!	0.454157	0.155863	0.724534	0.0619995	-0.399025	0.0755363	-0.323573	#DIV/0!	-0.270377	0.453879
Q9Y6W5	Wiskott-Aldrich syndrome protein family member 2	0.181517	0.177025	-0.201117	0.440629	-0.382634	0.188617	0.0284636	0.840186	0.269059	0.00584526	-0.0689172	0.316125	-0.486661	0.106215	-0.240595	0.080888
P49915	GMP synthase [glutamine-hydrolyzing]	0.28185	0.177115	-0.199337	0.451457	-0.481188	0.207335	0.0893751	0.616665	0.584777	0.00115588	-0.235562	0.112252	-0.987483	0.024031	-0.495402	0.0184523
Q9UKM9	RNA-binding protein Raly	0.300925	0.177145	-0.180833	0.351853	-0.481758	0.152762	0.108222	0.530725	0.509788	0.00143486	-0.188049	0.0783938	-0.834823	0.0001964	-0.401566	0.0351707
P37840	Alpha-synuclein	-0.401803	0.177431	0.4618	0.241779	0.863604	0.0797142	-0.0563619	0.849142	-0.0910528	0.734187	-0.160699	0.648797	0.298538	0.399078	0.0346909	0.899353
Q8IZL8	Proline-, glutamic acid- and leucine-rich protein 1	0.148226	0.178021	-0.109099	0.620348	-0.257325	0.298707	0.0452959	0.701472	0.24639	0.0146189	-0.051553	0.58079	-0.349242	0.0766895	-0.201094	0.0866589
Q7Z6Z7	E3 ubiquitin-protein ligase HUWE1	-0.108202	0.178701	0.0238018	0.723886	0.132004	0.0866482	-0.0554008	0.440539	-0.0599577	0.401415	0.00793505	0.596642	0.0580561	0.169279	0.00455692	0.929809
O43852	Calumenin	-0.408384	0.17875	0.102944	0.639934	0.511328	0.129157	-0.203853	0.42945	0.129339	0.62236	-0.378284	0.326327	-0.346249	0.220558	-0.333192	0.132867
O75348	V-type proton ATPase subunit G 1	0.121871	0.178781	-0.273032	#DIV/0!	-0.394903	#DIV/0!	0.0428905	0.711612	0.347727	0.00371608	-0.17854	0.272765	-0.668075	#DIV/0!	-0.304837	0.0159382
Q9UDY2	Tight junction protein ZO-2	0.275315	0.178855	-0.323423	0.160263	-0.598738	0.0462062	0.0358198	0.847436	0.118794	0.398906	0.111992	0.503084	-0.461839	0.0132997	-0.0829746	0.627561
Q9BWM7	Sideroflexin-3	0.271577	0.178983	-0.119317	0.623312	-0.390894	0.195164	0.11522	0.537591	0.335426	0.0535254	-0.0789167	0.146002	-0.552468	0.0853595	-0.220207	0.154844
P07996	Thrombospondin-1	-0.368016	0.179088	0.148044	0.688756	0.516061	0.208706	-0.161592	0.563347	-0.237978	0.440615	0.0299019	0.776364	0.179225	0.519029	0.0763862	0.758405
Q6PK04	Coiled-coil domain-containing protein 137	0.229496	0.179111	-0.236336	#DIV/0!	-0.465832	#DIV/0!	0.13633	0.412052	0.417266	0.103105	-0.366973	0.409886	-0.474399	#DIV/0!	-0.280936	0.265692
P08697	Alpha-2-antiplasmin	-0.521716	0.180168	0.614436	0.109156	1.13615	0.0527785	-0.0672553	0.841893	-0.328864	0.253855	-0.0365935	0.715733	1.07142	0.0778531	0.261608	0.458529
P20700	Lamin-B1	0.466134	0.18026	-0.0669423	0.849246	-0.533077	0.200016	0.252904	0.358649	0.935045	0.000995671	-0.429325	0.100259	-1.25987	0.012049	-0.682141	0.0219695
Q9UPN7	Serine/threonine-protein phosphatase 6 regulatory subunit 1	-0.210852	0.180598	-0.142223	0.519957	0.0686291	0.994527	-0.183401	0.210396	0.119536	0.415838	-0.23417	0.192433	-0.259047	0.309504	-0.302937	0.0263737
Q969M7	NEDD8-conjugating enzyme UBE2F	0.223509	0.180635	-0.0116559	0.96776	-0.235165	0.474305	0.129443	0.441837	-0.0786142	0.591732	0.39533	0.0318768	-0.112531	0.751527	0.208057	0.163008
Q6PI78	Transmembrane protein 65	-0.141739	0.180654	0.426754	#DIV/0!	0.568494	#DIV/0!	-0.0280407	0.853609	-0.323575	0.0118862	0.198205	0.0231776	0.73396	#DIV/0!	0.295534	0.0606636
P61006	Ras-related protein Rab-8A	0.441738	0.180741	-0.63914	#DIV/0!	-1.08088	#DIV/0!	0.225562	0.534341	0.845527	0.00835915	-0.365907	0.0645684	-1.52255	#DIV/0!	-0.619965	0.0815832
P55060	Exportin-2	0.178459	0.180767	-0.0562432	0.709811	-0.234702	0.259061	0.0845782	0.448404	0.284668	0.0053838	-0.0673652	0.38508	-0.449463	0.0384069	-0.20009	0.0673449
P15408	Fos-related antigen 2	0.51856	0.18101	-0.321618	0.297792	-0.840178	0.148906	0.182489	0.523853	0.420407	0.0451323	0.0967479	0.754661	-0.836211	0.0711025	-0.237918	0.423131
P09429	High mobility group protein B1	0.368152	0.181054	-0.25152	0.42429	-0.619672	0.13392	0.120283	0.609592	0.682922	0.000660213	-0.372781	0.0797666	-0.976846	0.00973872	-0.562639	0.0166424
P49770	Translation initiation factor eIF-2B subunit beta	0.148171	0.181639	-0.084711	0.153159	-0.232882	0.112189	0.055018	0.505407	0.219503	0.0107247	-0.01127	0.80499	-0.39676	0.0796763	-0.164485	0.0791722
P49757	Protein numb homolog	0.291248	0.181855	-0.233925	#DIV/0!	-0.525173	#DIV/0!	0.186213	0.385446	0.533131	0.0187216	-0.188836	0.802703	-0.820104	#DIV/0!	-0.346918	0.125024
Q9Y237	Peptidyl-prolyl cis-trans isomerase NIMA-interacting 4	0.124082	0.18225	0.104223	0.412164	-0.019859	0.875853	0.116139	0.19684	0.171359	0.0661219	-0.0200256	0.723663	-0.133187	0.357316	-0.0552209	0.403057
Q9BUH6	Protein PAXX	-0.182479	0.182889	-0.209228	0.304004	-0.0267492	0.680633	-0.193178	0.135854	0.114192	0.386571	-0.128946	0.404925	-0.40393	0.0701565	-0.30737	0.0140121
P61254	60S ribosomal protein L26	0.27902	0.183344	-0.00306483	0.986222	-0.282085	0.18737	0.166186	0.352138	0.459279	0.0115478	-0.124073	0.319121	-0.559094	0.0387754	-0.293092	0.0308393
Q96KA5	Cleft lip and palate transmembrane protein 1-like protein	0.355307	0.183554	-0.138321	#DIV/0!	-0.493628	#DIV/0!	0.256582	0.303153	0.932352	0.045796	-0.363439	0.412387	-1.28428	#DIV/0!	-0.67577	0.114203
Q5VTE6	Protein angel homolog 2	0.25117	0.183664	-0.418195	#DIV/0!	-0.669365	#DIV/0!	0.117297	0.587483	0.289139	0.106793	0.0285026	0.519312	-0.773805	#DIV/0!	-0.171842	0.379801
P35232	Prohibitin 1	0.178913	0.183813	0.0647852	0.770882	-0.114128	0.396326	0.133262	0.30491	0.304786	0.0222198	-0.15707	0.564764	-0.333947	0.221786	-0.171524	0.174839
Q15637	Splicing factor 1	0.191703	0.183946	-0.232472	0.134135	-0.424175	0.0374674	0.0220327	0.873017	0.331274	0.00760658	-0.0714529	0.393664	-0.636732	0.0263422	-0.309241	0.0146063
P42704	Leucine-rich PPR motif-containing protein, mitochondrial	0.265906	0.184062	-0.202015	0.43645	-0.467921	0.0905104	0.0787377	0.692027	0.396682	0.0562892	-0.24746	0.0283223	-0.71219	0.0257214	-0.317945	0.0852302
Q8WUF5	RelA-associated inhibitor	0.165536	0.184118	-0.137822	0.214299	-0.303358	0.0360944	0.0441932	0.696567	-0.0866021	0.445422	0.214234	0.113521	0.0369861	0.850265	0.130795	0.215431
P26038	Moesin	0.367022	0.184252	-0.118294	0.703068	-0.485316	0.283977	0.172895	0.430322	0.748594	9.99746e-05	-0.359986	0.0189911	-0.952426	0.00617015	-0.575699	0.0147741
Q15061	WD repeat-containing protein 43	0.643937	0.184551	-2.09492	#DIV/0!	-2.73886	#DIV/0!	0.0961652	0.890661	1.03815	0.0272688	-0.625321	0.804962	-2.90197	#DIV/0!	-0.941989	0.208594
P55209	Nucleosome assembly protein 1-like 1	0.232697	0.184658	-0.0740996	0.748498	-0.306796	0.215054	0.109978	0.48675	0.568264	0.000298032	-0.386301	0.0043399	-0.60856	0.0210261	-0.458286	0.00354019
O43488	Aflatoxin B1 aldehyde reductase member 2	-0.148166	0.184738	0.254843	0.238173	0.403009	0.0993882	0.0130373	0.922946	-0.101504	0.449056	0.0960968	0.489513	0.208242	0.448222	0.114541	0.394623
O76094	Signal recognition particle subunit SRP72	0.240168	0.184955	-0.0873221	0.753662	-0.32749	0.314785	0.109172	0.502564	0.602131	0.000889489	-0.339069	0.0237122	-0.836253	0.00345255	-0.492959	0.0132379
P07585	Decorin	-0.621954	0.184976	-0.131869	0.76845	0.490085	0.407969	-0.42592	0.252546	-1.01149	0.0307667	0.271785	0.595686	1.25965	0.0690303	0.585575	0.188797
Q14112	Nidogen-2	-0.349588	0.185091	-0.188265	0.62928	0.161324	0.981016	-0.285059	0.186799	-0.394757	0.059058	0.0627652	0.392229	0.25604	0.474073	0.109698	0.656596
P50454	Serpin H1	0.445707	0.185729	0.269331	0.613595	-0.176377	0.824278	0.375157	0.169546	1.1127	0.00386032	-0.549016	0.251502	-1.30028	0.0185043	-0.737542	0.0666001
P13798	Acylamino-acid-releasing enzyme	-0.244341	0.186258	0.0178469	0.921921	0.262188	0.428822	-0.139466	0.340525	-0.157702	0.22861	-0.00920268	0.404775	0.147963	0.415226	0.0182359	0.89608
Q12857	Nuclear factor 1 A-type	-0.175661	0.18628	-0.050602	0.78055	0.125059	0.399886	-0.125637	0.343455	-0.250687	0.1374	0.0101498	0.984331	0.334359	0.229848	0.12505	0.361666
P11142	Heat shock cognate 71 kDa protein	0.139629	0.186795	-0.0863879	0.282768	-0.226017	0.0277947	0.0492221	0.581082	0.345102	0.000248709	-0.236311	0.00115222	-0.434876	0.00267928	-0.29588	0.000768657
Q96B70	Leukocyte receptor cluster member 9	0.281299	0.187065	0.192248	#DIV/0!	-0.0890512	#DIV/0!	0.263489	0.169915	0.218081	0.527903	-0.0662649	0.849432	0.10365	#DIV/0!	0.0454078	0.888679
O00233	26S proteasome non-ATPase regulatory subunit 9	0.181219	0.187084	-0.0581844	0.722839	-0.239404	0.157418	0.0854578	0.493686	0.362045	0.0029519	-0.12851	0.20308	-0.459049	0.0975336	-0.276587	0.0101646
Q9BQE4	Selenoprotein S	0.441887	0.187099	-0.231387	#DIV/0!	-0.673273	#DIV/0!	0.307232	0.297869	0.985267	0.0208582	-0.412082	0.441696	-1.34795	#DIV/0!	-0.678035	0.0947363
P10599	Thioredoxin	-0.266163	0.1871	-0.312532	0.227058	-0.0463695	0.760815	-0.28471	0.131035	-0.327396	0.192264	-0.191937	0.436445	0.461675	0.200613	0.0426855	0.842616
Q99615	DnaJ homolog subfamily C member 7	-0.260266	0.187157	0.0154053	0.956575	0.275671	0.547327	-0.149998	0.406	0.149306	0.380991	-0.385927	0.0886101	-0.0589527	0.88508	-0.299304	0.0958684
Q15382	GTP-binding protein Rheb	0.12073	0.187834	0.0581122	0.601436	-0.0626177	0.460782	0.0956828	0.286661	0.326965	0.00613469	-0.0645007	0.579262	-0.398861	0.0909995	-0.231282	0.0129579
Q86UP2	Kinectin	0.174335	0.188136	-0.112905	0.530408	-0.28724	0.142019	0.0594392	0.639724	0.394027	0.00818001	-0.345156	0.0191708	-0.475086	0.0230113	-0.334588	0.0203508
P84090	Enhancer of rudimentary homolog	0.262132	0.188229	-0.0711152	0.738458	-0.333247	0.226527	0.128833	0.479054	0.414153	0.0252971	-0.0822094	0.0727927	-0.554674	0.149932	-0.285321	0.0528088
P35527	Keratin, type I cytoskeletal 9	0.490056	0.188764	0.405278	0.360512	-0.0847775	0.827806	0.456145	0.103555	-0.413267	0.0693149	0.936662	0.201173	0.94199	0.0734786	0.869411	0.0057118
P30622	CAP-Gly domain-containing linker protein 1	0.159373	0.189512	-0.0286927	0.812368	-0.188066	0.0994042	0.0841467	0.402724	0.145227	0.123421	-0.0171073	0.688832	-0.0995637	0.556546	-0.0610801	0.504917
Q5TCZ1	SH3 and PX domain-containing protein 2A	-0.343202	0.189618	0.270826	0.350311	0.614028	0.0188473	-0.0975903	0.707797	-0.847862	0.0028786	0.682208	0.0385301	1.03802	0.0411108	0.750272	0.000672258
Q9Y6M5	Zinc transporter 1	0.383081	0.189749	-0.0793559	0.677723	-0.462437	0.223943	0.198106	0.364525	0.168117	0.409304	0.298127	0.517125	-0.404077	0.00532351	0.0299893	0.888626
Q15293	Reticulocalbin-1	-0.187473	0.189801	0.20528	0.387829	0.392753	0.176599	-0.0303714	0.834394	0.0500166	0.699889	-0.145884	0.613383	0.0617	0.760191	-0.0803879	0.586964
P26358	DNA (cytosine-5)-methyltransferase 1	0.370693	0.189878	-0.197208	0.542051	-0.567902	0.135407	0.143532	0.570171	0.955564	0.000326213	-0.608867	0.00336801	-1.19237	0.0038735	-0.812032	0.00158997
Q3MHD2	Protein LSM12 homolog	0.182218	0.19026	-0.142591	0.363816	-0.324809	0.125555	0.0522945	0.666886	0.420478	0.00223635	-0.216228	0.018014	-0.667161	0.0285091	-0.368184	0.0108881
P06126	T-cell surface glycoprotein CD1a	0.650457	0.190344	-0.503325	0.624908	-1.15378	0.40459	0.188944	0.713106	0.269016	0.482494	0.50194	0.688107	-0.886582	0.299446	-0.0800721	0.881808
Q8TEQ0	Sorting nexin-29	0.128999	0.190471	0.0718341	#DIV/0!	-0.057165	#DIV/0!	0.117566	0.184895	0.349788	0.00156442	-0.217433	0.392417	-0.28131	#DIV/0!	-0.232222	0.00698657
P28906	Hematopoietic progenitor cell antigen CD34	-0.64659	0.190471	-0.525904	0.120337	0.120686	0.601337	-0.598316	0.0749785	-0.794444	0.0154797	0.153926	0.318919	0.421533	0.306007	0.196129	0.56603
Q96JH7	Deubiquitinating protein VCPIP1	0.173398	0.19056	-0.0710284	0.618531	-0.244427	0.139912	0.0756277	0.514388	0.306169	0.00624452	-0.141567	0.102001	-0.41364	0.00637208	-0.230541	0.027255
Q96G23	Ceramide synthase 2	0.174122	0.190677	-0.00882176	0.94529	-0.182943	0.065636	0.0643556	0.619199	0.0923814	0.50208	0.098323	0.19934	-0.225978	0.293741	-0.0280259	0.76011
P52298	Nuclear cap-binding protein subunit 2	-0.419195	0.190848	-0.116813	0.755845	0.302383	0.46923	-0.237766	0.332097	-0.138126	0.434743	-0.0767416	0.946291	-0.124414	0.714773	-0.0996399	0.684245
Q9H9B4	Sideroflexin-1	0.219393	0.19089	0.0973016	0.646043	-0.122091	0.400459	0.170556	0.250503	0.498502	0.00337218	-0.239191	0.0104711	-0.539145	0.136786	-0.327946	0.0279207
Q9Y673	Dolichyl-phosphate beta-glucosyltransferase	0.244827	0.191504	0.134131	0.585134	-0.110696	0.622474	0.200549	0.234831	0.950385	0.00122527	-0.486693	0.13091	-1.19337	0.00418742	-0.749836	0.00583294
Q7Z4F1	Low-density lipoprotein receptor-related protein 10	-0.20418	0.191611	-0.114078	#DIV/0!	0.0901025	#DIV/0!	-0.18616	0.159257	-0.160874	0.170436	0.0334024	0.210439	-0.0299132	#DIV/0!	-0.0252862	0.827319
O75410	Transforming acidic coiled-coil-containing protein 1	-0.210672	0.191754	-0.258854	0.266965	-0.0481822	0.692802	-0.229945	0.172062	-0.225449	0.168617	-0.0295893	0.940827	-0.0176467	0.930628	-0.00449595	0.956097
Q5SYB0	FERM and PDZ domain-containing protein 1	-0.693125	0.191796	0.976268	0.449442	1.66939	0.242488	0.308511	0.716308	-0.371948	0.442144	-0.126635	0.129472	1.15446	0.492768	0.680459	0.389892
Q86UU1	Pleckstrin homology-like domain family B member 1	-0.174285	0.191982	0.067418	0.751765	0.241703	0.365016	-0.0776035	0.554134	-0.0889733	0.426007	-0.00375091	0.840975	0.0642393	0.766924	0.0113698	0.919982
Q01196	Runt-related transcription factor 1	0.126015	0.192034	0.22497	0.357384	0.0989558	0.811325	0.165597	0.144467	0.530091	0.00123461	-0.295906	0.168849	-0.422426	0.121635	-0.364494	0.0201103
Q16891	MICOS complex subunit MIC60	0.25114	0.192057	0.0567915	0.863842	-0.194348	0.445987	0.1734	0.365189	0.313829	0.126483	-0.260182	0.324935	-0.289246	0.490709	-0.140429	0.475802
P12883	Myosin-7	0.860591	0.192255	0.457833	0.661132	-0.402759	0.47101	0.699488	0.226974	-0.0745075	0.877774	0.470676	0.0307542	0.883912	0.364503	0.773995	0.190394
Q9BRQ0	Pygopus homolog 2	0.267751	0.192483	-0.114463	0.409179	-0.382215	0.156609	0.114866	0.471928	0.382332	0.0104905	-0.0202898	0.428135	-0.536584	0.052849	-0.267466	0.0767802
O95831	Apoptosis-inducing factor 1, mitochondrial	0.228241	0.192566	0.0206748	0.950967	-0.207566	0.406673	0.145215	0.39435	0.410048	0.0175308	-0.217442	0.275181	-0.615921	0.148166	-0.264833	0.17574
Q9UH99	SUN domain-containing protein 2	0.241256	0.192689	-0.138815	0.560551	-0.380071	0.186137	0.0892272	0.566595	0.461886	0.000134795	-0.193544	0.395968	-0.706116	0.0347881	-0.372659	0.0211712
Q8TD16	Protein bicaudal D homolog 2	0.422428	0.192711	-0.348863	0.333692	-0.77129	0.0999953	0.113911	0.67565	0.529091	0.0111496	-0.11776	0.658003	-0.930595	0.00142611	-0.41518	0.119712
Q9NSE4	Isoleucine--tRNA ligase, mitochondrial	0.230865	0.192795	-0.0780958	0.700845	-0.308961	0.206355	0.107281	0.507308	0.343065	0.0355628	-0.155093	0.277468	-0.546062	0.0302165	-0.235784	0.0954848
P51116	Fragile X mental retardation syndrome-related protein 2	0.232076	0.192899	0.140076	0.331255	-0.0919999	0.328121	0.195276	0.140395	0.246165	0.0620223	0.0312882	0.421604	-0.213936	0.116852	-0.0508893	0.685791
P53611	Geranylgeranyl transferase type-2 subunit beta	0.290262	0.192904	-0.206933	#DIV/0!	-0.497195	#DIV/0!	0.190823	0.381923	0.690106	0.00246184	-0.338166	0.520576	-0.958715	#DIV/0!	-0.499282	0.0255538
O15400	Syntaxin-7	-0.157612	0.193061	-0.0935676	0.466723	0.0640444	0.658434	-0.131994	0.22793	0.0212828	0.834093	-0.116098	0.250815	-0.171865	0.0481888	-0.153277	0.0307581
P19971	Thymidine phosphorylase	0.434316	0.193391	-0.253772	0.383547	-0.688088	0.0498475	0.159081	0.60298	0.714198	0.0412263	-0.0836973	0.371725	-1.00717	0.0635151	-0.555117	0.0558934
Q96C23	Galactose mutarotase	-0.330655	0.193432	0.118781	0.649212	0.449436	0.242767	-0.150881	0.492573	0.236842	0.263436	-0.507661	0.205354	-0.0478477	0.859519	-0.387723	0.0628208
Q9Y5R8	Trafficking protein particle complex subunit 1	0.18944	0.193561	-0.0227968	0.890173	-0.212237	0.317022	0.104545	0.403641	0.15684	0.261576	0.106069	0.285039	-0.237214	0.395669	-0.0522944	0.699252
Q9H078	Caseinolytic peptidase B protein homolog	0.22388	0.19406	-0.0837363	0.762954	-0.307616	0.260911	0.100833	0.524933	0.457392	0.00684895	-0.267105	0.0123214	-0.714426	0.0419057	-0.356559	0.0573795
O75153	Clustered mitochondria protein homolog	0.16391	0.19442	-0.112194	0.420757	-0.276104	0.0504352	0.0534682	0.64708	0.0476982	0.700384	0.182413	0.00162463	-0.170608	0.395737	0.00577003	0.960227
P06731	Carcinoembryonic antigen-related cell adhesion molecule 5	-0.555592	0.194538	-0.558882	0.183123	-0.00329036	0.966019	-0.556908	0.0849393	-0.40551	0.346519	0.260327	0.604097	-0.404292	0.663624	-0.151399	0.726567
O75781	Paralemmin-1	-0.214011	0.194779	0.0599272	0.723014	0.273938	0.231057	-0.104436	0.471666	-0.347878	0.0233378	0.0962049	0.572259	0.551391	0.067339	0.243443	0.0701178
O60934	Nibrin	0.189635	0.194836	-0.0825533	0.770696	-0.272189	0.443879	0.0807599	0.572246	0.341212	0.00130084	-0.243273	0.128753	-0.331633	0.294953	-0.260452	0.0805667
Q9UKD2	mRNA turnover protein 4 homolog	-0.219398	0.194973	0.135477	0.822732	0.354874	0.582941	-0.0774479	0.765825	-0.198432	0.226745	-0.0826507	0.365603	0.332397	0.612068	0.120984	0.589126
Q6UWP7	Lysocardiolipin acyltransferase 1	0.184458	0.195035	-0.0671783	#DIV/0!	-0.251637	#DIV/0!	0.134131	0.342541	0.185561	0.326362	0.0403477	0.865758	-0.29419	#DIV/0!	-0.05143	0.750925
Q9P265	Disco-interacting protein 2 homolog B	0.276978	0.195405	-0.159929	0.381216	-0.436907	0.187911	0.102215	0.524875	0.203957	0.0828251	0.0958461	0.966733	-0.3877	0.170748	-0.101741	0.526321
Q5JPH6	Probable glutamate--tRNA ligase, mitochondrial	0.299475	0.195679	0.520691	#DIV/0!	0.221216	#DIV/0!	0.343718	0.11741	0.377189	0.0744142	0.0236637	0.7058	0.0421246	#DIV/0!	-0.0334705	0.823785
Q07960	Rho GTPase-activating protein 1	0.180955	0.195682	-0.0747036	0.751053	-0.255659	0.433713	0.0786918	0.537712	0.384569	0.00857565	-0.2309	0.272977	-0.48949	0.0770849	-0.305877	0.0640037
Q9H1B7	Probable E3 ubiquitin-protein ligase IRF2BPL	0.18938	0.195825	-0.175847	#DIV/0!	-0.365227	#DIV/0!	0.116334	0.433398	0.386568	0.0155193	-0.223365	0.0248425	-0.536239	#DIV/0!	-0.270234	0.0770384
P39019	40S ribosomal protein S19	0.268998	0.196103	0.0698812	0.743406	-0.199117	0.476572	0.189351	0.294342	0.410549	0.0450525	-0.0376061	0.711875	-0.237317	0.492179	-0.221198	0.192964
P55081	Microfibrillar-associated protein 1	0.236699	0.196145	-0.34062	0.0380961	-0.577319	0.0209397	0.00577119	0.973221	0.23585	0.201078	-0.0994457	0.321321	-0.725567	0.00118443	-0.230079	0.228388
P60709	Actin, cytoplasmic 1	0.181071	0.196353	-0.0797879	0.689927	-0.260859	0.305986	0.0767276	0.555355	0.461005	0.00029887	-0.202631	0.0564684	-0.598979	0.0193109	-0.384278	0.00343791
P21266	Glutathione S-transferase Mu 3	-0.412471	0.196511	0.252944	0.188566	0.665414	0.0910644	-0.0132222	0.952673	-0.902697	0.0600873	0.788072	0.611618	1.28209	0.270388	0.889474	0.0686039
P05107	Integrin beta-2	0.332175	0.19696	0.194386	0.563399	-0.137789	0.687066	0.277059	0.257092	1.03025	0.00137946	-0.613856	0.0594515	-0.983848	0.00934627	-0.753194	0.00478622
Q9NWU5	39S ribosomal protein L22, mitochondrial	0.309284	0.19766	-0.0806583	0.677168	-0.389942	0.0192683	0.153307	0.455139	0.452869	0.0234163	-0.168887	0.784849	-0.617689	0.0356525	-0.299562	0.0494994
Q14566	DNA replication licensing factor MCM6	0.291289	0.197842	-0.188772	0.512689	-0.480061	0.273414	0.0992649	0.598317	0.440845	0.00240637	-0.177262	0.0226238	-0.613352	0.0709134	-0.34158	0.0823584
P63165	Small ubiquitin-related modifier 1	0.221762	0.197849	-0.219289	0.332843	-0.441051	0.0985428	0.0453418	0.787334	0.379964	0.0224464	-0.154519	0.0949086	-0.700962	0.0658665	-0.334622	0.0404491
Q14152	Eukaryotic translation initiation factor 3 subunit A	0.240624	0.198832	-0.0794604	0.68859	-0.320084	0.152446	0.11259	0.482408	0.401551	0.0113802	-0.148026	0.211813	-0.529125	0.0124145	-0.288961	0.0561941
O00429	Dynamin-1-like protein	0.250893	0.198968	0.0190587	0.890948	-0.231834	0.0532291	0.158159	0.27192	0.330619	0.00759232	-0.122781	0.96006	-0.329171	0.0777134	-0.17246	0.161293
P07360	Complement component C8 gamma chain	-0.308414	0.199784	0.486578	0.126281	0.794991	0.0406418	0.009583	0.968086	-0.284297	0.205514	0.077903	0.690891	0.877667	0.0320347	0.29388	0.241039
Q9Y4K1	Beta/gamma crystallin domain-containing protein 1	0.289131	0.199962	0.0734503	0.806447	-0.21568	0.628056	0.202859	0.330481	-0.0913085	0.653533	0.315877	0.0823337	0.292158	0.585128	0.294167	0.108205
P39748	Flap endonuclease 1	0.151659	0.200111	-0.213409	0.0150594	-0.365069	0.0173985	0.00563172	0.958419	0.445531	0.00346324	-0.269879	0.0168445	-0.809961	0.0309808	-0.439899	0.00429113
P11766	Alcohol dehydrogenase class-3	-0.176054	0.200314	0.0984831	0.603459	0.274537	0.23354	-0.0662394	0.596216	0.00475793	0.97373	0.048192	0.778933	-0.0645752	0.719428	-0.0709973	0.643942
Q2M389	WASH complex subunit 4	0.269771	0.200755	-0.0322259	#DIV/0!	-0.301996	#DIV/0!	0.209371	0.277976	0.605985	0.00341422	-0.313294	0.0953552	-0.661131	#DIV/0!	-0.396614	0.029611
Q1W6H9	Protein FAM110C	0.387324	0.20097	0.764328	0.285787	0.377004	0.553957	0.613527	0.156482	-0.294568	0.33167	0.58022	0.0255933	1.46228	0.407878	0.908095	0.0384465
Q6FI81	Anamorsin	0.136859	0.201168	-0.113875	0.381489	-0.250734	0.109242	0.0365654	0.718545	0.352844	0.00203609	-0.206716	0.0445169	-0.45453	0.0709196	-0.316279	0.00387082
Q9H7L9	Sin3 histone deacetylase corepressor complex component SDS3	0.230328	0.201307	-0.246261	#DIV/0!	-0.476588	#DIV/0!	0.13501	0.444705	0.471125	0.00180956	-0.190198	0.650491	-0.767984	#DIV/0!	-0.336115	0.0727822
Q8WZA0	Protein LZIC	-0.260603	0.201687	0.195867	0.305938	0.45647	0.0960446	-0.078015	0.657246	-0.0130055	0.932691	-0.101453	0.656481	0.137573	0.569774	-0.0650096	0.67945
P62753	40S ribosomal protein S6	0.323081	0.201718	-0.114178	0.669362	-0.43726	0.200176	0.148178	0.488948	0.555473	0.00681195	-0.160256	0.258713	-0.807925	0.0112455	-0.407295	0.0435767
Q86U38	Nucleolar protein 9	0.306482	0.201794	-0.156253	#DIV/0!	-0.462735	#DIV/0!	0.213935	0.330962	0.591943	0.0202387	-0.401718	0.507563	-0.63194	#DIV/0!	-0.378009	0.132288
Q9Y617	Phosphoserine aminotransferase	0.310023	0.201806	0.104605	0.75641	-0.205419	0.782631	0.227856	0.294926	0.263507	0.242042	0.265591	0.602661	-0.218504	0.612859	-0.035651	0.869338
Q99623	Prohibitin-2	0.306931	0.201897	-0.0341546	0.904258	-0.341086	0.159888	0.170497	0.458109	0.441013	0.0770848	-0.225203	0.0545253	-0.637234	0.0320688	-0.270516	0.153966
P56377	AP-1 complex subunit sigma-2	0.220121	0.201926	-0.00535271	0.980858	-0.225474	0.339252	0.129932	0.405442	0.420805	0.00529574	-0.166364	0.118119	-0.472564	0.0615708	-0.290873	0.0291771
O75400	Pre-mRNA-processing factor 40 homolog A	0.41654	0.201989	-0.391603	0.331802	-0.808143	0.16466	0.0932829	0.732927	0.609096	0.00304747	-0.231452	0.173622	-1.11569	0.0119516	-0.515813	0.0771978
Q9NRL2	Bromodomain adjacent to zinc finger domain protein 1A	-0.189027	0.201992	-0.214751	#DIV/0!	-0.025724	#DIV/0!	-0.194172	0.132246	0.0826346	0.529334	-0.207837	0.845014	-0.36121	#DIV/0!	-0.276806	0.0559649
A0A0J9YX35	Immunoglobulin heavy variable 3-64D	-0.16588	0.202061	0.25784	0.0586961	0.42372	0.0448279	0.0883518	0.559724	0.0374177	0.855489	0.0442971	0.389353	0.165087	0.406719	0.0509341	0.80747
Q96DZ9	CKLF-like MARVEL transmembrane domain-containing protein 5	-0.395594	0.202071	0.814207	#DIV/0!	1.2098	#DIV/0!	-0.153634	0.684776	-0.851145	0.063068	-0.0177836	0.909397	2.13869	#DIV/0!	0.697511	0.108377
P49721	Proteasome subunit beta type-2	-0.292172	0.202078	-0.179943	0.479702	0.112229	0.551373	-0.247281	0.192064	-0.202416	0.19553	-0.0541627	0.581483	0.0702292	0.781422	-0.0448642	0.745603
O14531	Dihydropyrimidinase-related protein 4	-0.198432	0.20217	0.0694135	0.698896	0.267845	0.199526	-0.0912938	0.476023	-0.113311	0.274735	-0.0161357	0.834848	0.198	0.344911	0.022017	0.856526
O60763	General vesicular transport factor p115	-0.123262	0.202258	0.143306	0.586172	0.266568	0.333552	-0.0166347	0.897895	0.286519	0.0571918	-0.388229	0.1642	-0.224681	0.24154	-0.303153	0.0551563
Q15436	Protein transport protein Sec23A	0.236765	0.202331	-0.0817963	0.637878	-0.318561	0.21128	0.10934	0.417712	0.508134	0.00124807	-0.213054	0.476611	-0.746164	0.00956451	-0.398793	0.024424
Q9BUP3	Oxidoreductase HTATIP2	0.244206	0.202627	-0.224909	0.373223	-0.469114	0.18387	0.0565601	0.742508	0.283095	0.0987353	0.0141867	0.726302	-0.535612	0.144095	-0.226534	0.24365
P01857	Immunoglobulin heavy constant gamma 1	-0.34809	0.203048	0.426289	0.315781	0.774379	0.0849685	-0.0383388	0.889698	-0.192604	0.481654	0.127725	0.759757	0.291467	0.587486	0.154265	0.601278
Q8IXJ6	NAD-dependent protein deacetylase sirtuin-2	0.150716	0.203064	0.151604	0.298276	0.000888117	0.668227	0.151071	0.174254	0.156346	0.130853	-0.000275215	0.173066	0.0216405	0.792532	-0.00527452	0.931787
O00303	Eukaryotic translation initiation factor 3 subunit F	0.158055	0.203207	-0.0613497	0.5374	-0.219405	0.142856	0.070293	0.464706	0.242768	0.0217516	-0.021475	0.919052	-0.32212	0.0744647	-0.172475	0.115438
Q5JPE7	Nodal modulator 2	0.171775	0.203486	0.0749185	0.662053	-0.0968563	0.553578	0.133032	0.241883	0.612653	0.000219376	-0.437174	0.022498	-0.651489	0.00291745	-0.479621	0.00226634
O75694	Nuclear pore complex protein Nup155	0.107768	0.20406	0.054687	0.734846	-0.0530809	0.967987	0.0865355	0.287834	0.169267	0.019041	-0.0505923	0.0333628	-0.195704	0.187604	-0.0827318	0.32272
Q6IN85	Serine/threonine-protein phosphatase 4 regulatory subunit 3A	0.189191	0.204176	-0.0455589	0.768478	-0.234749	0.234923	0.0952908	0.481652	0.29541	0.0257386	-0.100774	0.133043	-0.35763	0.00933735	-0.200119	0.041395
O94819	Kelch repeat and BTB domain-containing protein 11	-0.175417	0.204254	0.341887	0.108275	0.517304	0.0474228	0.0315048	0.837859	-0.0988457	0.483896	0.107428	0.105104	0.338023	0.127191	0.13035	0.38037
Q96IU4	Protein ABHD14B	-0.294052	0.204689	0.148875	0.530388	0.442928	0.228557	-0.116881	0.544364	-0.216056	0.256586	0.0847849	0.421991	0.350175	0.133826	0.0991747	0.621357
P62333	26S proteasome regulatory subunit 10B	0.182153	0.204727	-0.109372	0.398097	-0.291525	0.0525264	0.0655429	0.609938	0.287728	0.0267229	-0.117668	0.516242	-0.404037	0.00733918	-0.222185	0.0409084
O15027	Protein transport protein Sec16A	-0.145896	0.204737	0.0375554	0.873976	0.183451	0.573463	-0.0725154	0.550753	0.203594	0.0721475	-0.309764	0.188557	-0.258227	0.0864292	-0.276109	0.0377989
Q5JRX3	Presequence protease, mitochondrial	0.192599	0.205023	0.0200535	0.911666	-0.172546	0.211832	0.123581	0.329731	0.316942	0.00858424	-0.168565	0.445645	-0.32446	0.080093	-0.193361	0.107424
P26447	Protein S100-A4	-0.294401	0.205241	0.048223	0.794465	0.342624	0.151358	-0.0888266	0.659876	0.00653095	0.977543	-0.33566	0.637575	0.350433	0.276854	-0.0953576	0.606988
O75674	TOM1-like protein 1	-0.176003	0.205423	0.138662	0.702264	0.314666	0.332363	-0.050137	0.768001	-0.314298	0.0314075	0.252238	0.0882645	0.418151	0.39673	0.264161	0.141265
P52292	Importin subunit alpha-1	0.198877	0.205555	0.0193069	0.917122	-0.17957	0.552488	0.127049	0.320148	0.319512	0.0136022	-0.155074	0.194831	-0.170297	0.0120683	-0.192463	0.153774
Q15428	Splicing factor 3A subunit 2	0.313979	0.205583	-0.325991	0.258974	-0.63997	0.137686	0.0579913	0.775156	0.531981	0.00271917	-0.288838	0.0534674	-0.926489	0.0102212	-0.47399	0.0460027
P61353	60S ribosomal protein L27	0.257103	0.206235	-0.0068977	0.968798	-0.264	0.227985	0.151503	0.381452	0.477376	0.00918748	-0.137642	0.3382	-0.638866	0.0256707	-0.325873	0.0227659
Q9BRJ2	39S ribosomal protein L45, mitochondrial	0.44955	0.206251	0.523606	#DIV/0!	0.0740566	#DIV/0!	0.464361	0.160982	0.81722	0.0218681	-0.401483	0.0512113	-0.259801	#DIV/0!	-0.352859	0.119454
Q9NY12	H/ACA ribonucleoprotein complex subunit 1	0.17602	0.206341	-0.0633373	0.811025	-0.239357	0.362155	0.0802769	0.579447	0.263867	0.0824491	-0.0905229	0.540245	-0.346826	0.223442	-0.18359	0.246422
P33993	DNA replication licensing factor MCM7	0.406846	0.206777	-0.318536	0.476162	-0.725382	0.260163	0.116694	0.669773	0.645818	0.000663396	-0.328264	0.0416413	-0.91231	0.0617563	-0.529125	0.065955
O15143	Actin-related protein 2/3 complex subunit 1B	0.357414	0.207211	-0.167366	0.517511	-0.52478	0.174626	0.147502	0.525835	0.748982	0.00126505	-0.423128	0.00937287	-0.95714	0.0069414	-0.601479	0.00978347
P52272	Heterogeneous nuclear ribonucleoprotein M	0.21688	0.207608	-0.151078	0.38947	-0.367958	0.174797	0.0696969	0.623619	0.31872	0.0045296	-0.0737852	0.305532	-0.530916	0.00499106	-0.249023	0.0605615
Q07507	Dermatopontin	-0.30223	0.207701	0.261582	0.413092	0.563812	0.172275	-0.0767053	0.726705	-0.438057	0.103861	0.0920005	0.638526	0.972192	0.0682993	0.361352	0.201344
Q86XP3	ATP-dependent RNA helicase DDX42	0.146411	0.207925	-0.219143	0.378902	-0.365553	0.18012	0.000189377	0.99885	0.331036	0.00162527	-0.204585	0.0449521	-0.611785	0.0300763	-0.330846	0.017066
Q13610	Periodic tryptophan protein 1 homolog	-0.255939	0.207969	-0.0579798	0.685226	0.197959	0.307708	-0.137163	0.307265	0.21757	0.112105	-0.520042	0.113572	-0.110951	0.400078	-0.354734	0.0105769
Q96EY8	Corrinoid adenosyltransferase	0.178107	0.20811	0.106301	0.616882	-0.0718053	0.445092	0.149384	0.224843	-0.0324311	0.812532	0.258961	0.0475612	-0.0144918	0.914057	0.181816	0.225364
Q9Y262	Eukaryotic translation initiation factor 3 subunit L	0.188421	0.208562	-0.166699	0.318751	-0.355119	0.115619	0.0463728	0.700137	0.313873	0.00421511	-0.115285	0.188812	-0.544055	0.0050892	-0.2675	0.0571288
Q969N2	GPI transamidase component PIG-T	0.203991	0.208692	-0.0382245	0.843601	-0.242215	0.195765	0.107105	0.422517	0.443799	0.00184225	-0.256763	0.242685	-0.58476	0.0130608	-0.336695	0.025992
Q02318	Sterol 26-hydroxylase, mitochondrial	0.339386	0.208694	-0.157702	0.535524	-0.497088	0.209442	0.14055	0.52388	0.443827	0.0375986	-0.141624	0.181613	-0.81623	0.00549515	-0.303277	0.168031
Q5EBM0	UMP-CMP kinase 2, mitochondrial	-0.470353	0.209654	-0.151631	0.539636	0.318722	0.35362	-0.27912	0.297733	0.0750688	0.768805	-0.478848	0.339646	-0.316022	0.364065	-0.354189	0.0479468
P42166	Lamina-associated polypeptide 2, isoform alpha	0.235508	0.210328	-0.104424	0.697249	-0.339931	0.34135	0.099535	0.530147	0.365833	0.00627725	-0.158656	0.342661	-0.446815	0.00150625	-0.266298	0.126149
Q9P0V9	Septin-10	0.466727	0.21052	-0.904139	#DIV/0!	-1.37087	#DIV/0!	0.192553	0.644258	0.574137	0.0472522	0.0770833	0.0107986	-1.66277	#DIV/0!	-0.381584	0.351865
Q9NR12	PDZ and LIM domain protein 7	0.299926	0.210522	-0.28723	0.186591	-0.587156	0.054485	0.0650635	0.733512	0.210397	0.230472	-0.0131567	0.88773	-0.464702	0.00729964	-0.145334	0.499568
O14662	Syntaxin-16	0.32016	0.210659	0.330487	0.527616	0.0103265	0.804417	0.324291	0.20084	0.374343	0.0686526	-0.0996988	0.871542	-0.137334	0.576491	-0.0500519	0.838784
P07737	Profilin-1	0.228692	0.2107	-0.210216	0.356952	-0.438908	0.0755078	0.0531289	0.772766	0.612018	0.0018754	-0.291587	0.0321267	-0.924869	0.0230516	-0.558889	0.000693345
O75531	Barrier-to-autointegration factor	0.339781	0.210733	-0.257487	#DIV/0!	-0.597267	#DIV/0!	0.220327	0.397908	0.407018	0.0963874	0.116333	0.247395	-0.848075	#DIV/0!	-0.186691	0.456778
P30038	Delta-1-pyrroline-5-carboxylate dehydrogenase, mitochondrial	0.254591	0.210925	0.0676167	0.879333	-0.186974	0.636539	0.179801	0.443254	0.0307184	0.884274	0.163526	0.199373	0.00270752	0.993345	0.149083	0.450073
Q9Y4W6	AFG3-like protein 2	0.259555	0.211481	-0.00730426	0.979935	-0.266859	0.248417	0.152811	0.418935	0.457039	0.0157243	-0.28905	0.260801	-0.567807	0.157452	-0.304228	0.0940191
Q86V81	THO complex subunit 4	0.178327	0.212111	-0.0885468	0.587006	-0.266874	0.150872	0.0715777	0.602537	0.194789	0.14813	0.0418602	0.9787	-0.274034	0.254688	-0.123212	0.22035
P09110	3-ketoacyl-CoA thiolase, peroxisomal	0.20122	0.212168	-0.268425	0.2136	-0.469645	0.0812248	0.0133619	0.928541	0.266814	0.0421687	-0.118988	0.252123	-0.58039	0.000671576	-0.253452	0.115529
Q9NQ38	Serine protease inhibitor Kazal-type 5	-0.474575	0.212222	-0.123341	0.688356	0.351234	0.407845	-0.334081	0.227713	-0.913265	0.00785647	0.39246	0.427797	1.03586	0.140072	0.579183	0.0895866
P05186	Alkaline phosphatase, tissue-nonspecific isozyme	0.295749	0.212596	0.268953	0.556971	-0.0267966	0.830316	0.285031	0.209851	0.357198	0.124594	0.230211	0.730359	-0.260209	0.463031	-0.0721677	0.781261
Q9ULR0	Pre-mRNA-splicing factor ISY1 homolog	-0.840417	0.212665	-0.627032	#DIV/0!	0.213385	#DIV/0!	-0.79774	0.200672	-0.951059	0.106176	0.268948	0.408609	0.16572	#DIV/0!	0.153318	0.650663
Q9Y4P3	Transducin beta-like protein 2	0.380048	0.212882	0.156322	0.715659	-0.223726	0.763581	0.290557	0.255958	0.833507	0.00838932	-0.261984	0.298061	-1.0441	0.0185301	-0.54295	0.0930904
Q92598	Heat shock protein 105 kDa	0.227283	0.213016	-0.162776	0.18297	-0.390059	0.0848426	0.071259	0.634213	0.72147	6.392e-05	-0.462307	0.0073091	-0.938878	0.0133153	-0.650211	0.000209585
P99999	Cytochrome c	0.357602	0.213188	0.163766	0.667103	-0.193836	0.46145	0.280068	0.301411	0.356327	0.235374	-0.283413	0.379901	-0.209108	0.336414	-0.0762593	0.757317
P26373	60S ribosomal protein L13	0.276924	0.213204	0.0416822	0.830395	-0.235242	0.359597	0.182827	0.320162	0.500023	0.0103886	-0.120369	0.174886	-0.61742	0.021739	-0.317195	0.0468705
Q8TEB9	Rhomboid-related protein 4	0.102496	0.213341	-0.306137	#DIV/0!	-0.408632	#DIV/0!	0.0207693	0.853023	0.192223	0.0723693	-0.0452273	0.982058	-0.542859	#DIV/0!	-0.171454	0.16877
Q08AF3	Schlafen family member 5	0.306631	0.213693	-0.0817706	0.754338	-0.388402	0.159339	0.151271	0.443477	0.657098	0.00112624	-0.435808	0.0138026	-0.659152	0.00900338	-0.505827	0.0192382
P17275	Transcription factor JunB	0.229238	0.214012	-0.265014	0.0159759	-0.494252	0.0471218	0.0315367	0.819426	0.358018	0.00610799	-0.126899	0.559465	-0.642927	0.040343	-0.326481	0.0530473
P15927	Replication protein A 32 kDa subunit	0.197015	0.214095	0.0448382	0.742662	-0.152177	0.495411	0.136144	0.305193	0.375298	0.00719764	-0.186698	0.134364	-0.345764	0.150272	-0.239154	0.0224318
Q8WUM0	Nuclear pore complex protein Nup133	0.295367	0.214304	-0.168108	0.586516	-0.463475	0.292204	0.109977	0.572922	0.464668	0.00311438	-0.167715	0.230764	-0.794815	0.0304858	-0.354691	0.0931007
Q9UGM6	Tryptophan--tRNA ligase, mitochondrial	0.173602	0.21472	0.112986	0.470364	-0.0606159	0.666594	0.137233	0.280247	0.141511	0.259521	-0.00470679	0.228896	-0.0378075	0.882773	-0.00427826	0.962319
Q969V3	Nicalin	0.203707	0.214771	-0.0360987	0.850005	-0.239806	0.257251	0.107785	0.419229	0.517837	0.00149635	-0.280568	0.236861	-0.703907	0.00120393	-0.410052	0.0147493
P00325	All-trans-retinol dehydrogenase [NAD(+)] ADH1B	-0.692273	0.21495	0.26823	0.703816	0.960503	0.363164	-0.308072	0.528442	-0.602522	0.17132	0.358333	0.384799	0.67281	0.253302	0.294451	0.52562
Q6P1N0	Coiled-coil and C2 domain-containing protein 1A	0.244665	0.215044	-0.163126	0.48885	-0.407791	0.25778	0.0815487	0.611117	0.251891	0.0546281	0.112049	0.798196	-0.590448	0.055161	-0.170343	0.319962
Q8WX93	Palladin	0.229792	0.215219	-0.202392	0.485953	-0.432184	0.204502	0.0569183	0.736175	0.374898	0.0340366	-0.127778	0.652326	-0.657871	0.0161299	-0.317979	0.128226
O00291	Huntingtin-interacting protein 1	0.182723	0.215449	-0.0967924	#DIV/0!	-0.279516	#DIV/0!	0.12682	0.332579	0.101644	0.383223	0.0945895	0.399289	-0.211947	#DIV/0!	0.0251759	0.856721
Q9BUF5	Tubulin beta-6 chain	0.359539	0.215648	-0.1231	0.301584	-0.482639	0.0616905	0.166484	0.392002	0.469042	0.00274653	-0.0857203	0.824142	-0.669383	0.0131245	-0.302559	0.134788
Q562R1	Beta-actin-like protein 2	0.207333	0.215729	-0.0842142	0.692954	-0.291547	0.317045	0.0907138	0.543524	0.533877	0.000280952	-0.268954	0.06075	-0.621537	0.0245792	-0.443163	0.00268754
Q9BZJ0	Crooked neck-like protein 1	0.197585	0.215762	0.0667193	0.779599	-0.130866	0.736023	0.145239	0.278749	0.256549	0.0329354	-0.0683413	0.00211843	-0.18641	0.394802	-0.11131	0.436562
Q8IWX8	Calcium homeostasis endoplasmic reticulum protein	0.228442	0.216224	-0.253613	0.28911	-0.482054	0.103303	0.0356198	0.838426	0.552974	0.000813446	-0.348415	0.0801605	-0.827338	0.00117607	-0.517354	0.00368693
P40939	Trifunctional enzyme subunit alpha, mitochondrial	0.34936	0.216346	0.150691	0.752835	-0.19867	0.489208	0.269892	0.325775	0.341301	0.235732	-0.182342	0.83467	-0.326165	0.558355	-0.0714083	0.7991
P62760	Visinin-like protein 1	0.315373	0.216822	-0.375181	0.270185	-0.690554	0.0667456	0.0391514	0.876542	0.0764712	0.785742	-0.0946617	0.885923	-0.0746726	0.892393	-0.0373198	0.894375
O60547	GDP-mannose 4,6 dehydratase	-0.794631	0.216838	0.241502	0.699674	1.03613	0.11947	-0.172951	0.7733	-0.40563	0.487553	-0.629266	0.617116	0.693656	0.168687	0.232679	0.615766
Q9NQG1	Protein MANBAL	0.184952	0.217	-0.367849	0.31647	-0.552802	0.147286	-0.0361683	0.836452	0.395295	0.0372492	-0.169779	0.719185	-0.869188	0.0313251	-0.431463	0.0700209
Q6UXN9	WD repeat-containing protein 82	0.206024	0.21716	-0.115514	0.332651	-0.321538	0.147121	0.0774091	0.540095	0.37569	0.000514801	-0.156244	0.159926	-0.554635	0.000155547	-0.298281	0.01768
Q13164	Mitogen-activated protein kinase 7	-0.201782	0.217163	0.0323164	0.794477	0.234098	0.191199	-0.0613228	0.57007	-0.141191	0.376392	0.227016	0.32019	-0.0128177	0.828463	0.0798681	0.631989
O95819	Mitogen-activated protein kinase kinase kinase kinase 4	0.283163	0.217303	-0.150511	#DIV/0!	-0.433674	#DIV/0!	0.196428	0.33541	0.11197	0.395538	0.122982	0.97245	-0.21427	#DIV/0!	0.0844584	0.647751
Q92888	Rho guanine nucleotide exchange factor 1	0.358394	0.217459	-0.109895	0.752544	-0.468289	0.22276	0.171078	0.493963	0.837165	0.000586524	-0.39269	0.062707	-1.04243	0.00466524	-0.666086	0.00702726
P06865	Beta-hexosaminidase subunit alpha	-0.238703	0.217718	0.240599	0.390529	0.479301	0.106095	-0.0469823	0.821244	0.192574	0.361679	-0.211385	0.391312	-0.101555	0.664816	-0.239556	0.16664
P46937	Transcriptional coactivator YAP1	-0.116646	0.217739	-0.0610002	0.750604	0.0556458	0.86349	-0.0943877	0.368035	-0.184668	0.102293	0.10823	0.292541	0.178026	0.423022	0.0902806	0.371054
Q8N257	Histone H2B type 3-B	-0.276614	0.217746	-0.195703	0.403279	0.0809117	0.885786	-0.24425	0.22228	0.182047	0.371746	-0.27929	0.310869	-0.559962	0.0354706	-0.426297	0.00884449
Q9UK22	F-box only protein 2	-0.323092	0.218039	0.0813995	0.640902	0.404491	0.152509	-0.080397	0.619747	-0.241803	0.0593228	0.0305328	0.810092	0.311626	0.344442	0.161406	0.334248
Q9Y4F1	FERM, ARHGEF and pleckstrin domain-containing protein 1	0.408447	0.2185	0.49832	0.569165	0.0898729	0.801759	0.444396	0.251377	0.342341	0.313899	0.0169642	0.764918	-0.147459	0.836735	0.102055	0.804536
Q9HC35	Echinoderm microtubule-associated protein-like 4	0.267019	0.218525	0.00852323	0.976728	-0.258496	0.598401	0.163621	0.351579	0.563693	0.0011856	-0.223573	0.0118339	-0.642066	0.0320053	-0.400072	0.047133
Q16204	Coiled-coil domain-containing protein 6	0.196957	0.218718	-0.0774799	0.770351	-0.274437	0.417214	0.0871824	0.561853	0.124495	0.234924	0.0236627	0.950024	-0.183937	0.475523	-0.0373127	0.778733
P20618	Proteasome subunit beta type-1	0.182255	0.218744	0.0361109	0.811427	-0.146144	0.41456	0.123797	0.336105	0.192386	0.128745	0.0354236	0.730895	-0.149957	0.322057	-0.0685885	0.48726
P31350	Ribonucleoside-diphosphate reductase subunit M2	0.195944	0.219004	-0.169289	0.479805	-0.365233	0.207278	0.0498506	0.749436	0.167732	0.317013	0.113025	0.522193	-0.34832	0.438148	-0.117882	0.491634
P13987	CD59 glycoprotein	-0.254104	0.219126	-0.367815	0.351958	-0.113711	0.564972	-0.299589	0.148008	-0.283563	0.108149	0.0215769	0.488255	0.00782422	0.978949	-0.0160254	0.928473
Q16537	Serine/threonine-protein phosphatase 2A 56 kDa regulatory subunit epsilon isoform	0.266174	0.219305	-0.0116158	0.956311	-0.27779	0.213316	0.155058	0.321346	0.581612	4.49557e-05	-0.334733	0.0455355	-0.618303	0.0644229	-0.426554	0.0163595
P10253	Lysosomal alpha-glucosidase	-0.539999	0.220149	0.237732	0.462203	0.777731	0.104368	-0.228907	0.484299	-0.185232	0.509078	-0.0637415	0.521577	0.274263	0.604868	-0.0436751	0.895217
Q13796	Protein Shroom2	0.192272	0.220192	0.0672726	0.762253	-0.124999	0.460552	0.142272	0.265601	0.384231	0.00834912	-0.0416586	0.937185	-0.427129	0.255695	-0.241959	0.128062
P09651	Heterogeneous nuclear ribonucleoprotein A1	0.328837	0.220434	-0.288335	0.34383	-0.617172	0.174666	0.0819684	0.707058	0.535978	0.00181443	-0.135194	0.300468	-0.95488	0.0103843	-0.45401	0.0526297
P16157	Ankyrin-1	-0.332158	0.220702	-0.292155	0.407144	0.0400031	0.802532	-0.316157	0.223036	-0.384603	0.177411	0.0389852	0.994391	0.0730615	0.840163	0.0684462	0.748982
P16885	1-phosphatidylinositol 4,5-bisphosphate phosphodiesterase gamma-2	-0.18256	0.220741	-0.202698	0.353027	-0.0201372	0.689897	-0.190615	0.184073	0.215269	0.197449	-0.260301	0.265035	-0.523996	0.109286	-0.405885	0.0102586
O00625	Pirin	-0.319164	0.220951	0.0990036	0.584559	0.418168	0.070034	-0.151897	0.457247	-0.397416	0.266302	0.702478	0.197858	-0.0738161	0.857432	0.245519	0.482157
P46781	40S ribosomal protein S9	0.262642	0.221238	0.0869329	0.668548	-0.175709	0.362637	0.192358	0.318058	0.382028	0.0540956	-0.030519	0.887289	-0.353511	0.198665	-0.18967	0.122516
Q2TAY7	WD40 repeat-containing protein SMU1	0.202209	0.221526	-0.220904	0.254264	-0.423113	0.103325	0.0329634	0.821932	0.3272	0.0314278	-0.205274	0.106223	-0.657992	0.0308294	-0.294236	0.0803738
P35475	Alpha-L-iduronidase	-0.165447	0.221548	0.144452	0.422284	0.309899	0.0911956	-0.0414872	0.75834	0.0115093	0.924665	-0.137071	0.407512	0.142301	0.588029	-0.0529965	0.617192
P10809	60 kDa heat shock protein, mitochondrial	0.190961	0.221706	0.0251575	0.892995	-0.165804	0.389596	0.12464	0.341027	0.410564	0.010187	-0.164543	0.159999	-0.634917	0.0393095	-0.285924	0.0659535
O43402	ER membrane protein complex subunit 8	-0.295486	0.221999	-0.023252	#DIV/0!	0.272234	#DIV/0!	-0.241039	0.284382	-0.0734345	0.712192	-0.114844	0.922958	-0.0570253	#DIV/0!	-0.167605	0.299203
Q96EB6	NAD-dependent protein deacetylase sirtuin-1	-0.272551	0.221999	-0.123512	0.595221	0.149039	0.554258	-0.183128	0.27341	0.228258	0.244037	-0.398698	0.00517426	-0.193965	0.0332594	-0.411386	0.0565481
P62750	60S ribosomal protein L23a	0.192653	0.22221	-0.0375343	0.786384	-0.230187	0.208499	0.100578	0.441912	0.356365	0.00905998	-0.134804	0.198952	-0.460066	0.0816553	-0.255787	0.0336672
P27797	Calreticulin	-0.237247	0.222271	-0.0370231	0.913629	0.200224	0.712479	-0.157157	0.406344	0.42106	0.0284569	-0.492315	0.00378609	-0.713575	0.0405254	-0.578218	0.00675309
P67812	Signal peptidase complex catalytic subunit SEC11A	0.208864	0.222552	-0.0986945	0.642888	-0.307558	0.250607	0.0858405	0.561847	0.547643	0.00113449	-0.23338	0.146705	-0.843572	0.0029476	-0.461803	0.00807741
P63241	Eukaryotic translation initiation factor 5A-1	0.265519	0.222651	-0.27437	0.212372	-0.539889	0.0730513	0.0495635	0.802067	0.331175	0.0705373	0.00585937	0.655813	-0.70307	0.070591	-0.281612	0.115945
Q13470	Non-receptor tyrosine-protein kinase TNK1	-0.208944	0.222941	-0.0576582	0.823947	0.151286	0.577632	-0.118172	0.473946	0.21722	0.184342	-0.303145	0.088154	-0.379959	0.210751	-0.335392	0.0923652
Q14435	Polypeptide N-acetylgalactosaminyltransferase 3	-0.574189	0.223057	-0.169249	0.781412	0.40494	0.486803	-0.331225	0.478185	-0.422752	0.350934	-0.336162	0.682757	0.58372	0.489017	0.0915271	0.810712
Q96IV0	Peptide-N(4)-(N-acetyl-beta-glucosaminyl)asparagine amidase	-0.269611	0.223282	0.0537447	0.882809	0.323355	0.378228	-0.0755975	0.773391	0.334562	0.188277	-0.459069	0.0505031	-0.588924	0.0882358	-0.410159	0.111215
Q6P1J9	Parafibromin	0.223643	0.223289	-0.226816	0.282021	-0.450459	0.148418	0.0434591	0.776847	0.33863	0.00425569	-0.0714371	0.145392	-0.683015	0.00984122	-0.295171	0.065022
P49840	Glycogen synthase kinase-3 alpha	0.127039	0.223515	-0.0330189	0.645755	-0.160058	0.197572	0.063016	0.458271	0.0771872	0.413531	0.134737	0.146161	-0.137883	0.30966	-0.0141712	0.865481
Q9H910	Jupiter microtubule associated homolog 2	0.177719	0.223602	-0.155966	0.415707	-0.333685	0.0695855	0.0442452	0.769334	0.209066	0.154259	-0.0259311	0.984536	-0.3179	0.333983	-0.164821	0.136483
P30837	Aldehyde dehydrogenase X, mitochondrial	-0.397593	0.223979	-0.107688	0.570682	0.289905	0.339227	-0.22365	0.245483	-0.16872	0.350132	-0.140081	0.540499	-0.0865313	0.365236	-0.0549294	0.722243
P02750	Leucine-rich alpha-2-glycoprotein	-0.220094	0.224014	0.505048	0.0866686	0.725141	0.0392	0.0699628	0.725668	-0.196639	0.28515	0.220847	0.347091	0.634326	0.0554944	0.266602	0.219894
P61158	Actin-related protein 3	0.242828	0.224658	-0.138539	0.619122	-0.381367	0.218615	0.090281	0.607855	0.499436	0.00089555	-0.180794	0.215489	-0.744961	0.0270076	-0.409155	0.0229642
Q8TBP5	Membrane protein FAM174A	-0.599402	0.225084	-0.719836	#DIV/0!	-0.120434	#DIV/0!	-0.623489	0.193072	-0.555145	0.227215	0.0924103	0.776773	-0.301358	#DIV/0!	-0.0683434	0.741803
Q1KMD3	Heterogeneous nuclear ribonucleoprotein U-like protein 2	0.243842	0.22516	-0.0972093	0.594062	-0.341051	0.331221	0.107421	0.465605	0.272566	0.0138402	-0.0269955	0.230527	-0.427131	0.0532841	-0.165145	0.275732
Q15418	Ribosomal protein S6 kinase alpha-1	0.280022	0.225417	-0.0210083	0.961613	-0.30103	0.627326	0.15961	0.467525	0.646905	0.000345624	-0.262935	0.032132	-0.818513	0.0853978	-0.487295	0.0381827
O14735	CDP-diacylglycerol--inositol 3-phosphatidyltransferase	0.192725	0.225438	-0.45734	#DIV/0!	-0.650065	#DIV/0!	0.0627116	0.741872	0.0381386	0.761332	0.260148	0.256143	-0.601041	#DIV/0!	0.024573	0.890488
Q96E39	RNA binding motif protein, X-linked-like-1	0.23508	0.22584	0.202669	#DIV/0!	-0.0324112	#DIV/0!	0.228598	0.220781	0.152557	0.434692	0.162361	0.403982	-0.0297265	#DIV/0!	0.0760408	0.545938
Q08623	Pseudouridine-5'-phosphatase	-0.558813	0.226225	1.02439	#DIV/0!	1.5832	#DIV/0!	-0.242172	0.609894	-0.0307887	0.945356	-0.252522	0.810939	0.779677	#DIV/0!	-0.211384	0.727384
O60716	Catenin delta-1	0.279326	0.226225	-0.0755411	0.82269	-0.354867	0.481376	0.137379	0.471801	0.186362	0.2939	0.0279301	0.816282	-0.307714	0.381666	-0.0489833	0.830782
Q9UNF1	Melanoma-associated antigen D2	-0.0925602	0.226438	0.124238	0.53732	0.216798	0.306428	-0.00584104	0.954104	0.171712	0.0997374	-0.211505	0.104057	-0.110041	0.316007	-0.177553	0.102429
P37198	Nuclear pore glycoprotein p62	0.139895	0.226664	-0.0749361	0.642745	-0.214831	0.324541	0.0539626	0.572849	0.182751	0.0348344	-0.0312053	0.536719	-0.350216	0.110694	-0.128788	0.249186
Q12981	Vesicle transport protein SEC20	0.144576	0.227414	0.086029	0.265139	-0.0585467	0.0553417	0.121157	0.184483	0.29528	0.00484447	-0.0983609	0.777517	-0.313262	0.0434453	-0.174123	0.0444779
Q9NRV9	Heme-binding protein 1	-0.166222	0.22769	0.0675776	0.784813	0.233799	0.354569	-0.0727021	0.588861	-0.206244	0.10322	0.0710298	0.768095	0.123023	0.703671	0.133542	0.354715
Q6P1M3	LLGL scribble cell polarity complex component 2	-0.463419	0.228175	0.0456646	0.946678	0.509083	0.449313	-0.157969	0.739851	-0.183102	0.680303	-0.675392	0.41836	0.866432	0.467692	0.0251337	0.954486
P35326	Small proline-rich protein 2A	0.64007	0.228603	-0.551025	#DIV/0!	-1.19109	#DIV/0!	0.401851	0.464037	0.544526	0.462647	0.0675501	0.398683	-1.06756	#DIV/0!	-0.142675	0.82896
Q01995	Transgelin	-0.460449	0.228828	-0.335441	0.12536	0.125009	0.439201	-0.410446	0.114426	-0.348287	0.192264	-0.134581	0.672924	0.128734	0.655588	-0.0621592	0.822864
Q99848	Probable rRNA-processing protein EBP2	0.422028	0.229051	-0.343677	0.393759	-0.765705	0.149709	0.115746	0.703507	0.463847	0.0897232	-0.250338	0.215194	-0.851963	0.0157748	-0.348101	0.247292
P11117	Lysosomal acid phosphatase	-0.205245	0.229635	0.267552	0.436068	0.472797	0.221294	-0.0161261	0.93398	0.235412	0.150934	-0.354476	0.185433	-0.0342883	0.92283	-0.251538	0.152887
P19338	Nucleolin	0.355082	0.230103	-0.208813	0.493401	-0.563895	0.232923	0.129524	0.566321	0.510186	0.00191978	-0.298779	0.213901	-0.717417	0.0353506	-0.380661	0.104266
Q9H4M9	EH domain-containing protein 1	0.189414	0.23019	-0.0102171	0.948707	-0.199631	0.222489	0.109561	0.410981	0.510375	0.00100586	-0.336675	0.00740272	-0.543746	0.000258136	-0.400814	0.00401338
Q9NUQ2	1-acyl-sn-glycerol-3-phosphate acyltransferase epsilon	-0.215358	0.230252	0.0501217	#DIV/0!	0.265479	#DIV/0!	-0.162262	0.327697	-0.116026	0.412055	-0.0106267	0.633571	0.0774439	#DIV/0!	-0.0462352	0.721307
Q96MG2	Junctional sarcoplasmic reticulum protein 1	-0.769555	0.230264	-0.971526	0.384246	-0.201971	0.660689	-0.850344	0.141699	-1.16572	0.0171498	0.17515	0.143067	0.322857	0.77023	0.315379	0.574362
P50914	60S ribosomal protein L14	-0.987238	0.230273	0.0468183	0.974403	1.03406	0.330745	-0.573616	0.494278	-0.948038	0.27256	0.702052	0.378956	-0.39893	0.108869	0.374422	0.654667
P29466	Caspase-1	0.333448	0.230737	-0.0701603	0.830776	-0.403609	0.302395	0.172005	0.459929	0.746506	0.00189177	-0.352377	0.26276	-0.951882	0.0273908	-0.574501	0.0202982
Q6P2E9	Enhancer of mRNA-decapping protein 4	-0.191865	0.230804	-0.0863895	0.569889	0.105475	0.619223	-0.149675	0.29769	0.182466	0.264362	-0.206608	0.134246	-0.524776	0.0259508	-0.332141	0.012558
P55084	Trifunctional enzyme subunit beta, mitochondrial	0.317129	0.231095	0.0789467	0.885171	-0.238183	0.50026	0.221856	0.43348	0.257213	0.340245	-0.100329	0.851387	-0.301099	0.607369	-0.035357	0.899057
P51798	H(+)/Cl(-) exchange transporter 7	0.175665	0.231175	-0.0850913	0.675778	-0.260756	0.174759	0.0713626	0.59915	0.372998	0.0118145	-0.125294	0.613421	-0.525006	0.0583559	-0.301636	0.0399207
P30153	Serine/threonine-protein phosphatase 2A 65 kDa regulatory subunit A alpha isoform	0.122161	0.231179	0.00155069	0.988884	-0.120611	0.250917	0.0739172	0.401808	0.249815	0.00364229	-0.133492	0.0939813	-0.223829	0.0880679	-0.175898	0.0135022
P82970	High mobility group nucleosome-binding domain-containing protein 5	-0.177891	0.231317	-0.152181	0.265588	0.0257103	0.787306	-0.162465	0.22589	-0.491602	0.0313781	0.199731	0.66207	0.611245	0.00102595	0.329137	0.0890574
Q6P1M0	Long-chain fatty acid transport protein 4	0.266989	0.231468	-0.195174	0.380101	-0.462163	0.0395535	0.0821235	0.681428	0.120308	0.479482	0.273565	0.0495493	-0.426197	0.0741301	-0.038185	0.797613
Q9BQ13	BTB/POZ domain-containing protein KCTD14	-0.488863	0.231574	-0.0542086	0.931288	0.434654	0.4631	-0.22807	0.623335	-0.210356	0.674397	-0.756487	0.531038	0.811837	0.444687	-0.0177143	0.969185
Q13287	N-myc-interactor	0.29299	0.231903	-0.145598	0.39349	-0.438587	0.0117776	0.117555	0.564807	0.90614	0.000201411	-0.586637	0.0750319	-1.10569	0.00368123	-0.788585	0.000230554
P08727	Keratin, type I cytoskeletal 19	-0.55874	0.232188	0.407742	0.584027	0.966482	0.299172	-0.172147	0.717238	0.466651	0.443877	-0.85616	0.279515	-0.471218	0.616437	-0.638798	0.289279
P01833	Polymeric immunoglobulin receptor	-0.583876	0.232605	0.623454	0.44477	1.20733	0.104405	-0.100944	0.834058	-0.405401	0.328564	-0.184291	0.400908	1.03459	0.215895	0.304457	0.533393
Q08357	Sodium-dependent phosphate transporter 2	0.243175	0.232655	0.201067	0.399625	-0.0421078	0.840976	0.226332	0.166783	0.242616	0.0950663	-0.0941507	0.734231	0.0551735	0.88198	-0.0162845	0.911139
P10636	Microtubule-associated protein tau	-0.451271	0.232676	0.214944	0.554627	0.666215	0.267587	-0.184785	0.542427	-0.772242	0.0126273	0.128582	0.199291	1.25166	0.0571671	0.587457	0.0723869
Q6P9B6	MTOR-associated protein MEAK7	0.248828	0.232702	-0.0985302	0.464524	-0.347358	0.162132	0.109884	0.497711	0.490345	0.00292876	-0.250292	0.0463019	-0.605098	0.0221515	-0.38046	0.0153476
P30047	GTP cyclohydrolase 1 feedback regulatory protein	-0.246166	0.232716	0.245745	0.0486028	0.491911	0.0196032	-0.0494017	0.758155	-0.32771	0.0460364	0.247717	0.418607	0.595185	0.0116297	0.278308	0.13132
Q96BQ1	Protein FAM3D	-4.44938	0.232863	0.0741373	0.969156	4.52352	0.221211	-1.73527	0.382775	-2.39379	0.166361	-2.31021	0.0213015	2.74873	0.482928	0.658514	0.738176
P32456	Guanylate-binding protein 2	0.249896	0.232872	0.000289766	0.999125	-0.249606	0.509751	0.150054	0.423772	0.848624	0.000458954	-0.681847	0.0660349	-0.765031	0.0153562	-0.698571	0.00183271
P61011	Signal recognition particle 54 kDa protein	0.115344	0.233392	-0.00332181	0.980691	-0.118666	0.279424	0.067878	0.421761	0.468218	7.80391e-05	-0.312997	0.0210272	-0.558017	0.00682188	-0.40034	0.000698872
P24844	Myosin regulatory light polypeptide 9	-0.215153	0.233528	-0.226157	0.267203	-0.0110036	0.649	-0.219555	0.202037	-0.311338	0.128481	0.0699415	0.485241	0.218713	0.408685	0.0917837	0.532375
Q08257	Quinone oxidoreductase	-0.160551	0.233811	0.0916085	0.405248	0.25216	0.0588809	-0.0596873	0.588485	-0.341931	0.0392398	0.207922	0.579026	0.440465	0.243644	0.282243	0.081405
P68366	Tubulin alpha-4A chain	0.32276	0.234048	-0.390508	0.092019	-0.713269	0.0214608	0.0374529	0.881944	0.362546	0.109965	-0.0569415	0.884807	-0.816356	0.00665869	-0.325093	0.0990267
P11172	Uridine 5'-monophosphate synthase	0.159365	0.234145	-0.17168	0.31943	-0.331045	0.151067	0.0269467	0.821311	0.288863	0.00835602	-0.0896466	0.394047	-0.492684	0.0495717	-0.261916	0.0422664
O14618	Copper chaperone for superoxide dismutase	-0.144505	0.234186	0.132666	0.333028	0.277172	0.0184879	-0.0336368	0.788939	-0.0514136	0.720738	0.0964	0.471629	0.0525318	0.593875	0.0177768	0.869401
Q07955	Serine/arginine-rich splicing factor 1	0.216222	0.234223	-0.198872	0.331171	-0.415094	0.147983	0.0501842	0.754711	0.406963	0.00469108	-0.199513	0.0540972	-0.699526	0.0075541	-0.356779	0.0206693
Q6QNY1	Biogenesis of lysosome-related organelles complex 1 subunit 2	0.143047	0.234246	-0.00579067	0.956793	-0.148838	0.233518	0.0835121	0.435878	0.145367	0.151303	0.0438593	0.713681	-0.208274	0.0378432	-0.0618551	0.307729
Q06787	Synaptic functional regulator FMR1	0.267565	0.23434	-0.189299	0.451105	-0.456864	0.188809	0.0848194	0.646873	0.484869	0.00251391	-0.1131	0.43864	-0.827815	0.00637036	-0.40005	0.0375528
P83916	Chromobox protein homolog 1	-0.167934	0.234377	-0.0917179	0.761439	0.0762157	0.657748	-0.137447	0.358137	0.188474	0.123448	-0.40875	0.0275574	-0.290996	0.368721	-0.325921	0.0277413
Q8N573	Oxidation resistance protein 1	-0.279479	0.234393	0.136336	0.659005	0.415815	0.186887	-0.0299897	0.908304	-0.231393	0.440413	-0.162505	0.570462	0.505608	0.333523	0.201403	0.457525
Q92896	Golgi apparatus protein 1	0.202573	0.235285	0.139979	0.690066	-0.0625939	0.90245	0.177535	0.293088	0.452318	0.00272015	-0.280706	0.0941769	-0.401699	0.124602	-0.274783	0.122834
Q16666	Gamma-interferon-inducible protein 16	0.314414	0.235436	-0.264297	0.386572	-0.578711	0.183824	0.0829301	0.688966	0.681358	1.44611e-05	-0.405061	0.0618548	-1.03084	0.0144312	-0.598428	0.0125426
P32969	60S ribosomal protein L9	0.245971	0.235899	0.129985	0.598391	-0.115986	0.702694	0.199577	0.275792	0.270143	0.12783	0.0758656	0.721682	-0.150701	0.714162	-0.0705661	0.623372
Q9Y624	Junctional adhesion molecule A	0.309111	0.235912	-0.135203	0.559389	-0.444313	0.323675	0.131385	0.487982	0.347286	0.0397291	-0.0387767	0.422004	-0.575488	0.202207	-0.2159	0.314071
P15559	NAD(P)H dehydrogenase [quinone] 1	-0.436708	0.236647	0.22019	0.619588	0.656898	0.154033	-0.173949	0.579754	-0.164036	0.667686	0.247498	0.498532	-0.0535498	0.830293	-0.00991295	0.980417
P08236	Beta-glucuronidase	-0.185398	0.236756	0.148939	0.317207	0.334337	0.0163443	-0.0516634	0.721443	0.297569	0.161591	-0.300888	0.206281	-0.150978	0.507583	-0.349232	0.0839002
P08240	Signal recognition particle receptor subunit alpha	0.272015	0.23707	0.0391919	0.896602	-0.232823	0.496996	0.178886	0.339573	0.634918	0.00161057	-0.325327	0.2075	-0.755058	0.0178148	-0.456032	0.0362224
Q9H939	Proline-serine-threonine phosphatase-interacting protein 2	-0.395586	0.237102	-0.269372	0.0310546	0.126214	0.61741	-0.319857	0.019942	0.105794	0.521276	-0.323906	0.542234	-0.725385	0.239869	-0.425651	0.023831
Q13330	Metastasis-associated protein MTA1	0.223869	0.237217	0.0702531	#DIV/0!	-0.153616	#DIV/0!	0.193146	0.248841	0.444605	0.0240342	-0.104837	0.48035	-0.490251	#DIV/0!	-0.251459	0.14126
Q5T4S7	E3 ubiquitin-protein ligase UBR4	0.0799665	0.23727	0.0547469	0.628739	-0.0252197	0.596454	0.0698787	0.259025	0.134863	0.0117547	-0.0141317	0.738471	-0.109677	0.165831	-0.0649843	0.259946
P68036	Ubiquitin-conjugating enzyme E2 L3	0.256033	0.237338	-0.140445	0.505347	-0.396478	0.129306	0.0974421	0.620259	0.405019	0.0359407	-0.108995	0.223262	-0.603587	0.0272754	-0.307576	0.0405366
Q14118	Dystroglycan 1	-0.363343	0.237527	-0.0955361	0.784131	0.267807	0.367245	-0.202659	0.502241	-0.403911	0.196776	0.0362355	0.8149	0.326872	0.160168	0.201252	0.327568
P31947	14-3-3 protein sigma	0.321581	0.237531	-0.568874	0.0298897	-0.890455	0.012669	-0.0346009	0.897813	0.0526519	0.870981	0.0889836	0.812782	-0.129873	0.782486	-0.0872528	0.785204
Q96T76	MMS19 nucleotide excision repair protein homolog	0.182103	0.237562	-0.0602817	0.691323	-0.242385	0.114595	0.085149	0.496068	0.353976	0.0122282	-0.204729	0.46765	-0.395018	0.016812	-0.268827	0.0574385
O95164	Ubiquitin-like protein 3	0.274493	0.237597	0.0145785	0.962996	-0.259915	0.372796	0.118544	0.634307	-0.421309	0.185762	0.772786	0.101914	0.774816	0.0684246	0.539854	0.0736292
P26006	Integrin alpha-3	-0.0620859	0.237686	-0.0369433	#DIV/0!	0.0251426	#DIV/0!	-0.0570574	0.266959	0.269159	0.153876	-0.154139	0.446734	-0.483208	#DIV/0!	-0.326216	0.105488
P51884	Lumican	-0.522013	0.238147	0.288319	0.539867	0.810333	0.152222	-0.19788	0.596533	-0.972384	0.0318758	0.360582	0.624782	1.6557	0.0376217	0.774504	0.0886805
P48556	26S proteasome non-ATPase regulatory subunit 8	0.158819	0.238577	0.0311063	0.86307	-0.127713	0.47905	0.107734	0.392679	0.174289	0.121683	0.0152558	0.783318	-0.127462	0.448189	-0.0665545	0.440108
P37837	Transaldolase	-0.192494	0.238779	0.101477	0.59245	0.293971	0.155506	-0.074906	0.620289	0.0704859	0.672758	-0.115435	0.460569	-0.0596467	0.714456	-0.145392	0.340701
O00567	Nucleolar protein 56	0.455245	0.238797	-0.332889	0.389305	-0.788134	0.134891	0.139991	0.641894	0.545316	0.0213012	-0.314067	0.307498	-0.837905	0.0426431	-0.405325	0.193875
P53999	Activated RNA polymerase II transcriptional coactivator p15	0.283045	0.238827	-0.207618	0.133073	-0.490663	0.141517	0.0867801	0.618616	0.559617	0.00110508	-0.200429	0.00244362	-0.848227	0.0299384	-0.472836	0.0192723
P54727	UV excision repair protein RAD23 homolog B	-0.155593	0.238977	0.0481398	0.805459	0.203733	0.203994	-0.0740998	0.580472	0.0815927	0.550329	-0.109452	0.242056	-0.12373	0.676815	-0.155692	0.175616
P46926	Glucosamine-6-phosphate isomerase 1	-0.162596	0.239004	0.197112	0.400283	0.359708	0.216142	-0.0187124	0.897232	0.279528	0.0508064	-0.226382	0.144428	-0.316164	0.108282	-0.298241	0.0467563
P23786	Carnitine O-palmitoyltransferase 2, mitochondrial	0.155726	0.23906	0.0794123	0.764022	-0.0763141	0.616267	0.125201	0.370719	0.351436	0.0237985	-0.187207	0.185331	-0.427514	0.0248869	-0.226235	0.132156
P31944	Caspase-14	0.631039	0.239375	1.48701	0.199546	0.855967	0.342342	0.973426	0.0770012	-0.679136	0.0683043	1.4927	0.0775752	2.15331	0.0430196	1.65256	0.00448353
O14908	PDZ domain-containing protein GIPC1	0.190845	0.239811	-0.0692107	0.760434	-0.260056	0.376917	0.086823	0.5672	-0.0150274	0.926056	0.183142	0.545828	0.123186	0.737243	0.10185	0.522461
Q13907	Isopentenyl-diphosphate Delta-isomerase 1	0.188128	0.239915	-0.12043	0.552421	-0.308558	0.22064	0.0647049	0.675806	0.229062	0.12544	-0.0808854	0.387983	-0.30002	0.397993	-0.164357	0.186658
Q9NRY4	Rho GTPase-activating protein 35	0.134699	0.240114	-0.118505	0.390914	-0.253204	0.218187	0.0334174	0.73225	0.0141482	0.874191	0.211903	0.0617417	-0.146849	0.0601028	0.0192692	0.855692
P49207	60S ribosomal protein L34	0.262623	0.240134	0.0140495	0.93929	-0.248573	0.21836	0.163194	0.406733	0.443959	0.0361612	-0.102751	0.410231	-0.595989	0.0802913	-0.280765	0.0481966
P50895	Basal cell adhesion molecule	-0.251556	0.240225	-0.0922457	0.697768	0.15931	0.435637	-0.187832	0.275512	-0.353175	0.0442377	0.231538	0.328323	0.152495	0.466752	0.165343	0.340261
Q9H6Z4	Ran-binding protein 3	0.188719	0.240256	0.0340532	0.834947	-0.154666	0.432903	0.126853	0.392404	0.317995	0.0431646	-0.0793424	0.193285	-0.250898	0.246498	-0.191142	0.0574463
Q92841	Probable ATP-dependent RNA helicase DDX17	0.289895	0.240401	-0.259175	0.366068	-0.54907	0.175379	0.0702668	0.738424	0.454484	0.00732188	-0.151873	0.312651	-0.86616	0.00988098	-0.384217	0.0615494
Q9Y277	Voltage-dependent anion-selective channel protein 3	0.544882	0.240596	-0.277879	0.720135	-0.822761	0.336097	0.0512251	0.920332	-0.120996	0.744783	0.440238	0.341192	-0.392472	0.802854	0.172221	0.731881
P51659	Peroxisomal multifunctional enzyme type 2	0.148639	0.240759	-0.0737397	0.677611	-0.222379	0.220114	0.0596878	0.618687	0.321354	0.0203527	-0.149666	0.181825	-0.557348	0.0171981	-0.261666	0.0486236
P06733	Alpha-enolase	0.15611	0.241326	-0.107173	0.586856	-0.263283	0.302415	0.050797	0.682252	0.386643	0.00276842	-0.18368	0.0276749	-0.551832	0.0989044	-0.335846	0.0145476
Q8WTT2	Nucleolar complex protein 3 homolog	0.274067	0.241826	-0.17512	0.371143	-0.449187	0.0519763	0.0943925	0.614907	0.39004	0.0388553	-0.28856	0.00970179	-0.43908	0.0843139	-0.295648	0.131838
Q01658	Protein Dr1	0.204333	0.241834	-0.0915457	0.653604	-0.295879	0.321679	0.0859818	0.565189	0.286719	0.0167457	-0.0704965	0.294618	-0.404106	0.145862	-0.200737	0.106991
Q8WUA2	Peptidyl-prolyl cis-trans isomerase-like 4	-0.20194	0.24198	-0.120388	0.62203	0.0815519	0.737467	-0.153009	0.342215	0.105009	0.389091	-0.230615	0.534939	-0.277941	0.370082	-0.258017	0.0884947
Q6PD62	RNA polymerase-associated protein CTR9 homolog	0.425557	0.242175	-0.301777	0.500838	-0.727333	0.257264	0.134623	0.645449	0.55426	0.00585247	-0.212756	0.239332	-0.878807	0.0491154	-0.419637	0.162652
P27348	14-3-3 protein theta	0.154636	0.242568	0.0277176	0.831301	-0.126919	0.41427	0.103869	0.383395	0.104166	0.408165	0.121362	0.452401	-0.108585	0.495351	-0.000297199	0.997405
P35222	Catenin beta-1	0.301026	0.243038	-0.151538	0.651349	-0.452564	0.346397	0.12	0.574015	0.0887442	0.637473	0.196817	0.663277	-0.28509	0.420608	0.0312557	0.894341
P15586	N-acetylglucosamine-6-sulfatase	-0.189518	0.243043	0.253903	0.371496	0.443421	0.183425	-0.0121495	0.945529	0.154993	0.366883	-0.082434	0.832231	-0.0605331	0.817591	-0.167143	0.323587
A6NFQ2	TRPM8 channel-associated factor 2	0.226501	0.243537	0.0470249	0.874967	-0.179476	0.511771	0.15471	0.405961	0.180555	0.275003	0.081939	0.305196	-0.0952334	0.474079	-0.0258448	0.861636
Q3ZAQ7	Vacuolar ATPase assembly integral membrane protein VMA21	0.219521	0.243641	0.086337	0.743279	-0.133184	0.412024	0.166247	0.342941	0.290278	0.0724053	0.0460794	0.15005	-0.351884	0.249908	-0.124031	0.348066
Q9P0J1	[Pyruvate dehydrogenase [acetyl-transferring]]-phosphatase 1, mitochondrial	-0.18335	0.244272	-0.0929797	0.598495	0.0903701	0.760894	-0.147202	0.301588	0.23205	0.147184	-0.283573	0.235564	-0.446099	0.10411	-0.379252	0.00678704
P42224	Signal transducer and activator of transcription 1-alpha/beta	0.375592	0.244282	-0.245954	0.532135	-0.621546	0.147838	0.126973	0.675065	1.05381	0.00147598	-0.666905	0.0175737	-1.35472	0.00339792	-0.926834	0.00187142
Q12849	G-rich sequence factor 1	-0.362073	0.244292	-0.175604	0.317884	0.18647	0.447836	-0.250192	0.0642083	-0.00573247	0.953269	-0.336759	0.0789983	-0.34207	0.0659858	-0.244459	0.0981973
P80303	Nucleobindin-2	-0.366903	0.244321	0.0977118	0.895583	0.464615	0.483997	-0.181057	0.635981	0.166568	0.6791	-0.54726	0.267467	-0.0899185	0.879099	-0.347625	0.379107
O00571	ATP-dependent RNA helicase DDX3X	0.302836	0.244381	-0.205609	0.324957	-0.508445	0.113708	0.099458	0.619765	0.523896	0.00811165	-0.129004	0.37512	-0.932424	0.0182554	-0.424438	0.0546413
Q99873	Protein arginine N-methyltransferase 1	0.324224	0.244448	-0.204633	0.49881	-0.528856	0.248882	0.112681	0.601088	0.547957	0.00378923	-0.188437	0.179527	-0.975407	0.00889674	-0.435276	0.0736919
Q4G0J3	La-related protein 7	0.274411	0.244732	-0.293751	0.432781	-0.568162	0.272534	0.0471464	0.819426	0.330136	0.00172706	-0.0998843	0.487321	-0.653201	0.0829883	-0.28299	0.183934
Q96IY4	Carboxypeptidase B2	-0.308164	0.245035	0.361218	0.181606	0.669382	0.0621177	0.0934649	0.723	0.135521	0.499286	-0.319768	0.0165471	0.00482126	0.240696	-0.0420557	0.85149
Q13459	Unconventional myosin-IXb	0.181992	0.245159	0.0619919	0.835572	-0.12	0.698678	0.133992	0.400678	0.497892	0.00247333	-0.235508	0.052446	-0.515418	0.0177607	-0.3639	0.026594
Q15050	Ribosome biogenesis regulatory protein homolog	0.336199	0.245282	-0.0966925	0.754107	-0.432892	0.21757	0.163042	0.501818	0.363399	0.170777	-0.180569	0.317718	-0.436521	0.311769	-0.200356	0.442895
Q8WTS6	Histone-lysine N-methyltransferase SETD7	-0.185279	0.245779	-0.0360514	0.782833	0.149227	0.447507	-0.125588	0.327294	-0.238559	0.157252	0.270538	0.29217	-0.00934737	0.970183	0.112971	0.461508
Q9BXK1	Krueppel-like factor 16	-0.231496	0.24679	0.0551582	0.827524	0.286654	0.254858	-0.116834	0.531053	-0.0999485	0.577126	-0.101757	0.161875	0.195971	0.48386	-0.0168859	0.911968
Q96ER9	Mitochondrial potassium channel	0.0893316	0.246808	-0.0452395	0.76926	-0.134571	0.292319	0.0355031	0.664545	0.125736	0.127297	-0.0247608	0.821985	-0.254826	0.24851	-0.0902326	0.306334
P13995	Bifunctional methylenetetrahydrofolate dehydrogenase/cyclohydrolase, mitochondrial	-0.0796806	0.246901	0.0658996	0.727237	0.14558	0.463215	0.00766751	0.94519	0.187236	0.115641	-0.229588	0.524852	-0.227693	0.0751472	-0.179569	0.213189
P06748	Nucleophosmin	0.329761	0.247125	-0.260092	0.401645	-0.589853	0.169813	0.09382	0.674508	0.534887	0.00211341	-0.453874	0.137455	-0.632596	0.034463	-0.441067	0.0670476
P50552	Vasodilator-stimulated phosphoprotein	0.272222	0.247395	-0.157367	0.573073	-0.429589	0.261414	0.100387	0.607371	0.717838	0.000262311	-0.41525	0.0229083	-0.953269	0.00521246	-0.617452	0.00542797
P52789	Hexokinase-2	0.241066	0.247426	-0.0884265	0.632647	-0.329493	0.158392	0.109269	0.461537	0.328127	0.022624	-0.055685	0.940018	-0.508231	0.0162216	-0.218858	0.21939
Q5T440	Putative transferase CAF17, mitochondrial	0.308886	0.247619	-0.57914	0.449928	-0.888026	0.235145	-0.046324	0.893882	-0.142176	0.580403	0.284857	0.144989	-0.229423	0.43021	0.0958517	0.795995
O43684	Mitotic checkpoint protein BUB3	0.283769	0.248253	-0.146741	0.543518	-0.43051	0.298029	0.111565	0.543751	0.442758	0.00323178	-0.103422	0.34018	-0.733811	0.0211534	-0.331193	0.0963704
Q92629	Delta-sarcoglycan	0.165364	0.248264	0.308815	0.10773	0.143451	0.298555	0.222744	0.124452	-0.167192	0.392996	0.218728	0.287355	0.522374	0.200379	0.389937	0.0307028
O00232	26S proteasome non-ATPase regulatory subunit 12	0.191597	0.248418	0.0473971	0.788564	-0.1442	0.498727	0.133917	0.347569	0.301242	0.0230244	-0.0719403	0.404407	-0.316835	0.114199	-0.167325	0.0988594
Q09028	Histone-binding protein RBBP4	0.18038	0.248789	-0.073801	0.553232	-0.254181	0.276745	0.0787077	0.510568	0.30808	0.00558027	-0.137784	0.119989	-0.373522	0.0766816	-0.229372	0.0537511
Q13136	Liprin-alpha-1	0.151647	0.248906	0.0818885	0.577059	-0.0697584	0.652318	0.123744	0.203278	0.525866	0.0143363	-0.504668	0.270332	-0.368308	0.186596	-0.402122	0.054679
Q9NRD5	PRKCA-binding protein	-0.582625	0.248996	0.167874	0.805638	0.750498	0.259084	-0.132326	0.811945	-0.25665	0.606106	-0.455735	0.552951	0.53275	0.55615	0.124324	0.752189
Q9NPA0	ER membrane protein complex subunit 7	0.0991271	0.249586	0.0268759	0.798827	-0.0722512	0.493404	0.0702266	0.329519	0.260815	0.000719756	-0.179592	0.086307	-0.268135	0.109825	-0.190588	0.0110312
Q06033	Inter-alpha-trypsin inhibitor heavy chain H3	0.571611	0.249586	1.30219	0.104897	0.730577	0.154936	0.863842	0.0618868	0.370111	0.348978	0.425118	0.888821	0.65945	0.32486	0.493731	0.243774
Q8NBU5	Outer mitochondrial transmembrane helix translocase	0.249358	0.24967	0.199516	#DIV/0!	-0.0498423	#DIV/0!	0.23939	0.187045	0.0209317	0.875007	0.163442	0.847828	0.243569	#DIV/0!	0.218458	0.168771
Q9UPT5	Exocyst complex component 7	0.115428	0.249853	-0.0338372	0.799291	-0.149265	0.244152	0.0557217	0.560927	0.0946816	0.285051	0.0716029	0.0728812	-0.213163	0.0264806	-0.0389599	0.588845
Q16629	Serine/arginine-rich splicing factor 7	0.271468	0.250356	-0.126336	0.467641	-0.397804	0.250628	0.112347	0.523789	0.448015	0.00890035	-0.151641	0.221672	-0.742401	0.00150412	-0.335668	0.0746228
Q12792	Twinfilin-1	0.229533	0.25038	-0.323073	0.18987	-0.552606	0.0839341	0.00849061	0.960818	0.333716	0.0127993	-0.0289269	0.895492	-0.669848	0.0848555	-0.325225	0.0801854
Q00325	Phosphate carrier protein, mitochondrial	0.331161	0.2504	-0.0216788	0.954476	-0.352839	0.19787	0.190025	0.4686	0.330611	0.209108	-0.104842	0.76953	-0.540692	0.145844	-0.140587	0.561363
Q9BZ23	Pantothenate kinase 2, mitochondrial	-0.0679402	0.250509	0.0414175	0.624188	0.109358	0.263521	-0.0241971	0.681303	-0.0324253	0.659189	0.069308	0.409877	0.00392252	0.969653	0.00822816	0.903368
O76013	Keratin, type I cuticular Ha6	1.37488	0.250641	1.76238	0.111151	0.387492	0.259807	1.52988	0.0946284	1.38679	0.239786	-0.222346	0.491956	1.79577	0.0375758	0.143094	0.90073
P55265	Double-stranded RNA-specific adenosine deaminase	0.238064	0.250917	-0.188078	0.427624	-0.426142	0.210942	0.0676077	0.682691	0.594264	4.42255e-05	-0.382913	0.0281777	-0.834363	0.00923425	-0.526657	0.00610318
Q9BVL2	Nucleoporin p58/p45	0.111455	0.250926	-0.237488	0.175433	-0.348944	0.0677485	-0.028122	0.788111	0.164174	0.0604252	-0.045897	0.791795	-0.500344	0.00952827	-0.192296	0.08515
Q08495	Dematin	-0.268756	0.251255	-0.219587	0.590937	0.0491691	0.83026	-0.249089	0.298555	-0.378981	0.119642	0.153937	0.471885	0.118502	0.742187	0.129892	0.532358
Q9Y333	U6 snRNA-associated Sm-like protein LSm2	-0.320271	0.251478	-0.187408	0.390009	0.132863	0.545465	-0.240553	0.270141	-0.143345	0.518238	-0.0716232	0.0348377	0.0389078	0.288965	-0.0972086	0.481729
Q8WUA7	TBC1 domain family member 22A	0.209729	0.251491	-0.0620785	0.815886	-0.271807	0.411977	0.101006	0.540042	0.335373	0.0148106	-0.0782693	0.478282	-0.471083	0.102293	-0.234367	0.118445
P18031	Tyrosine-protein phosphatase non-receptor type 1	0.196928	0.251584	-0.263573	0.278169	-0.460501	0.135731	0.0127275	0.932921	0.657024	0.000798145	-0.411519	0.00113882	-1.09223	0.0121956	-0.644297	0.0033415
Q9H3G5	Probable serine carboxypeptidase CPVL	0.297557	0.251659	0.358105	0.0693595	0.0605478	0.66131	0.321776	0.0915463	0.416263	0.0156258	-0.0303202	0.717525	-0.0926198	0.452377	-0.0944872	0.548394
Q9H6R4	Nucleolar protein 6	0.236723	0.251708	0.0794452	0.725213	-0.157278	0.524041	0.142356	0.378841	0.482314	0.0304781	-0.0541307	0.541601	-0.315216	0.128185	-0.339957	0.110694
P51888	Prolargin	-0.500332	0.251809	0.18895	0.695247	0.689282	0.187241	-0.224619	0.551534	-1.1178	0.0209531	0.532026	0.400688	1.67909	0.0589836	0.893177	0.0546472
P40424	Pre-B-cell leukemia transcription factor 1	-0.353647	0.251841	-0.56116	0.0310581	-0.207512	0.448368	-0.478155	0.0425698	-0.480408	0.053739	-0.0244165	0.477324	0.25372	0.467595	0.00225353	0.989827
Q01650	Large neutral amino acids transporter small subunit 1	0.204142	0.251925	-0.0157468	0.886985	-0.219889	0.256128	0.116186	0.369608	0.355807	0.0430796	0.0640558	0.49397	-0.623408	0.114278	-0.239621	0.167284
Q9BVJ7	Dual specificity protein phosphatase 23	0.197426	0.252444	-0.0393528	0.827998	-0.236779	0.385591	0.102715	0.497612	0.124552	0.373596	0.240288	0.148945	-0.382892	0.150905	-0.0218378	0.850626
P50502	Hsc70-interacting protein	0.160892	0.252647	0.0842947	0.579998	-0.0765975	0.924609	0.130253	0.284744	0.246459	0.0548	0.0682455	0.956089	-0.354704	0.0959273	-0.116206	0.261134
P61923	Coatomer subunit zeta-1	0.322845	0.252732	-0.469039	#DIV/0!	-0.791884	#DIV/0!	0.164468	0.592252	0.829507	0.0290711	-0.373615	0.394673	-1.43159	#DIV/0!	-0.665039	0.0532224
Q9NZM1	Myoferlin	0.317172	0.254427	-0.142347	0.711779	-0.459519	0.393699	0.133364	0.576743	0.398381	0.0319012	-0.122374	0.331056	-0.613851	0.0986201	-0.265017	0.250233
P52597	Heterogeneous nuclear ribonucleoprotein F	0.187738	0.254815	-0.248321	0.205321	-0.436059	0.104218	0.0133143	0.925276	0.392947	0.000522751	-0.158109	0.27779	-0.752084	0.0103998	-0.379633	0.0135199
P43243	Matrin-3	0.170986	0.255156	-0.149441	0.412216	-0.320427	0.182364	0.0428152	0.749221	0.31789	0.00593391	-0.16856	0.183667	-0.515869	0.0169184	-0.275075	0.026424
Q6ZRV2	Protein FAM83H	0.20176	0.255472	-0.402458	0.0319385	-0.604218	0.0167527	-0.039927	0.820288	-0.0181896	0.913646	0.357976	0.0451406	-0.500974	0.10482	-0.0217374	0.901995
P40938	Replication factor C subunit 3	0.148158	0.2559	0.0244739	0.935733	-0.123684	0.764301	0.0986844	0.480678	0.314208	0.00128819	-0.215708	0.0959067	-0.263686	0.36488	-0.215523	0.113256
P09012	U1 small nuclear ribonucleoprotein A	0.132636	0.255974	-0.183222	0.0915818	-0.315858	0.0549171	0.00629281	0.949683	0.278525	0.00143322	-0.168136	0.0259368	-0.433415	0.0908177	-0.272232	0.00995148
Q5T0Z8	Uncharacterized protein C6orf132	0.311081	0.256014	0.4108	0.191187	0.0997198	0.591054	0.370912	0.19492	0.123297	0.650149	-0.0110091	0.08724	0.614586	0.34293	0.247616	0.117464
Q86UK7	E3 ubiquitin-protein ligase ZNF598	0.260559	0.256028	-0.112215	0.52974	-0.372774	0.235563	0.11145	0.535766	0.328722	0.0694717	-0.00634651	0.757428	-0.531199	0.0458789	-0.217273	0.229213
Q96FV9	THO complex subunit 1	0.203584	0.25607	-0.0505491	0.712241	-0.254133	0.379605	0.101931	0.413639	0.399127	0.00205389	-0.139702	0.137701	-0.525587	0.0492286	-0.297196	0.0482293
P39023	60S ribosomal protein L3	0.336653	0.25609	-0.109002	0.687635	-0.445655	0.255389	0.158391	0.506295	0.51508	0.0219582	-0.163043	0.242828	-0.758516	0.0225549	-0.356689	0.107622
Q9UJY5	ADP-ribosylation factor-binding protein GGA1	0.196812	0.256388	-0.598448	#DIV/0!	-0.79526	#DIV/0!	0.0377601	0.867852	0.345177	0.0528233	-0.0742677	0.166737	-1.01772	#DIV/0!	-0.307417	0.160463
Q9Y3B8	Oligoribonuclease, mitochondrial	0.156907	0.256409	0.110134	0.529782	-0.0467725	0.883992	0.138198	0.251584	0.365767	0.0218725	-0.0593863	0.607174	-0.482272	0.213159	-0.227569	0.119562
P0DOX7	Immunoglobulin kappa light chain	-0.331782	0.256491	0.63786	0.135418	0.969643	0.0263412	0.0560749	0.84348	-0.0706956	0.770384	0.0613408	0.398917	0.487243	0.183118	0.12677	0.680271
Q9GZR7	ATP-dependent RNA helicase DDX24	0.497681	0.256745	-0.346131	0.460776	-0.843812	0.175019	0.160156	0.658392	0.866744	0.00850051	-0.524914	0.184685	-1.32428	0.0280115	-0.706588	0.0551506
Q9BXR0	Queuine tRNA-ribosyltransferase catalytic subunit 1	-0.275827	0.256805	-0.171212	0.4945	0.104614	0.698639	-0.213058	0.213103	-0.0463309	0.704835	-0.294126	0.177599	-0.0501481	0.735693	-0.166727	0.260269
Q9H488	GDP-fucose protein O-fucosyltransferase 1	-0.42637	0.257026	-0.156853	0.619719	0.269517	0.460703	-0.26466	0.327513	-0.239531	0.313059	-0.168025	0.048275	0.0424825	0.787955	-0.0251286	0.88867
Q14978	Nucleolar and coiled-body phosphoprotein 1	0.373894	0.25709	-0.149333	0.504575	-0.523227	0.119695	0.164603	0.480798	0.520881	0.0172716	-0.390397	0.0899855	-0.51365	0.000161315	-0.356277	0.167596
P17252	Protein kinase C alpha type	0.270628	0.257159	0.228109	0.617163	-0.0425191	0.967806	0.25362	0.25557	0.281813	0.0845764	0.0959204	0.886344	-0.269381	0.537991	-0.0281935	0.897443
Q96RQ3	Methylcrotonoyl-CoA carboxylase subunit alpha, mitochondrial	0.249016	0.257185	-0.156386	0.566146	-0.405403	0.269628	0.0868551	0.652331	0.353967	0.0566339	-0.0280679	0.662171	-0.734044	0.0303186	-0.267112	0.16935
P14866	Heterogeneous nuclear ribonucleoprotein L	0.214454	0.257192	-0.292754	0.201742	-0.507208	0.100738	0.0115706	0.946453	0.433995	0.00249903	-0.219102	0.145216	-0.837824	0.00617476	-0.422424	0.0135778
Q01484	Ankyrin-2	-0.131918	0.257217	-0.0231165	0.871963	0.108802	0.588141	-0.0883975	0.401818	-0.335551	0.0263772	0.209113	0.438155	0.403881	0.148908	0.247153	0.0724336
Q8TDX7	Serine/threonine-protein kinase Nek7	0.290255	0.257395	0.0716683	#DIV/0!	-0.218586	#DIV/0!	0.246537	0.313521	0.396548	0.102093	-0.113006	0.98426	-0.318167	#DIV/0!	-0.15001	0.241275
Q9H1Z4	WD repeat-containing protein 13	-0.153316	0.257517	-0.140392	0.380788	0.0129237	0.871004	-0.148146	0.231814	-0.25016	0.0412928	0.1512	0.410491	0.00343163	0.978466	0.102014	0.207227
P05023	Sodium/potassium-transporting ATPase subunit alpha-1	0.296161	0.258032	-0.0585852	0.867466	-0.354746	0.498831	0.154263	0.465501	0.46834	0.0375135	-0.220853	0.501789	-0.607139	0.099416	-0.314077	0.230854
Q9Y371	Endophilin-B1	0.155975	0.25827	0.147162	0.473003	-0.00881292	0.784222	0.15245	0.213816	0.329269	0.00540898	-0.100277	0.673611	-0.286947	0.123196	-0.176819	0.118831
Q86VR2	Reticulophagy regulator 3	-0.141125	0.258297	-0.058275	0.635544	0.0828498	0.66949	-0.107985	0.304306	-0.00118638	0.991043	-0.0788164	0.624139	-0.108484	0.0647844	-0.106799	0.239329
Q10472	Polypeptide N-acetylgalactosaminyltransferase 1	-0.386359	0.258313	0.237874	0.690592	0.624233	0.332495	-0.0118191	0.976644	0.179261	0.574574	-0.586849	0.356274	0.0556295	0.641022	-0.19108	0.623571
Q15435	Protein phosphatase 1 regulatory subunit 7	-0.178161	0.258341	0.0980565	0.645904	0.276218	0.360224	-0.0676741	0.650108	0.0216674	0.877621	-0.110482	0.809349	0.0516863	0.714183	-0.0893414	0.497733
P60900	Proteasome subunit alpha type-6	0.159436	0.258592	0.119936	0.348832	-0.0395002	0.688005	0.143636	0.194542	0.397993	0.00108033	-0.286065	0.042271	-0.203841	0.236668	-0.254358	0.0160379
P26599	Polypyrimidine tract-binding protein 1	0.235773	0.25944	-0.119495	0.501209	-0.355268	0.266841	0.0936662	0.56217	0.480409	0.000604998	-0.210067	0.170944	-0.66247	0.00160253	-0.386743	0.013868
Q9HC36	rRNA methyltransferase 3, mitochondrial	0.330297	0.259571	-0.457451	#DIV/0!	-0.787748	#DIV/0!	0.172748	0.556904	0.41154	0.376903	0.363046	0.533381	-1.31328	#DIV/0!	-0.238792	0.612979
P01871	Immunoglobulin heavy constant mu	-0.37533	0.260173	0.785991	0.050382	1.16132	0.0167559	0.0891986	0.790342	0.236474	0.469534	-0.596589	0.0362471	0.676329	0.143595	-0.147276	0.676389
Q9NUQ8	ATP-binding cassette sub-family F member 3	0.128916	0.260253	-0.200262	0.308567	-0.329179	0.101778	-0.00275523	0.981837	0.241256	0.0510584	-0.0463589	0.89192	-0.463906	0.041855	-0.244011	0.0654236
O60437	Periplakin	-0.283854	0.260713	-0.472409	0.14311	-0.188556	0.692952	-0.359276	0.116714	-0.760171	0.00528594	0.389676	0.402845	0.488607	0.235377	0.400895	0.0769679
O95466	Formin-like protein 1	0.308504	0.260721	-0.0212879	0.950688	-0.329792	0.334217	0.176587	0.481184	0.900856	0.00128691	-0.588616	0.0922291	-0.908085	0.0113538	-0.724268	0.00271332
O00410	Importin-5	0.183286	0.261389	0.00935989	0.923667	-0.173926	0.101675	0.113716	0.359661	0.479407	0.000580637	-0.255884	0.186112	-0.573368	0.013013	-0.365691	0.00237078
Q12906	Interleukin enhancer-binding factor 3	0.251471	0.261855	-0.262831	0.274053	-0.514302	0.169059	0.0457504	0.797183	0.383555	0.00125048	-0.181601	0.176615	-0.67203	0.0147729	-0.337805	0.0654233
P15090	Fatty acid-binding protein, adipocyte	-0.587134	0.261868	-0.191926	0.806669	0.395208	0.895012	-0.429051	0.334561	-0.907715	0.0515924	0.96607	0.0186869	0.58321	0.400643	0.478664	0.356263
P19367	Hexokinase-1	0.150648	0.261933	0.0600256	0.651368	-0.0906226	0.184804	0.114399	0.335296	0.311362	0.0241677	-0.223382	0.0784182	-0.33801	0.0125708	-0.196963	0.0624961
P11216	Glycogen phosphorylase, brain form	-0.210415	0.261986	0.146515	0.735901	0.35693	0.397169	-0.0676435	0.749334	0.126461	0.552682	-0.255517	0.457171	-0.0813486	0.771323	-0.194105	0.430852
Q8TB61	Adenosine 3'-phospho 5'-phosphosulfate transporter 1	-0.199688	0.262106	0.28871	0.206328	0.488399	0.0952166	-0.00432886	0.979333	-0.0999242	0.553354	-0.175917	0.70511	0.3906	0.246675	0.0955954	0.602532
Q08188	Protein-glutamine gamma-glutamyltransferase E	-0.407705	0.262911	-0.433557	0.315128	-0.0258528	0.934367	-0.418046	0.169627	-1.024	0.0118903	0.484649	0.258885	1.16329	0.221123	0.605949	0.104981
P78344	Eukaryotic translation initiation factor 4 gamma 2	0.192893	0.262934	-0.170801	0.422418	-0.363694	0.192397	0.0474154	0.739088	0.371631	0.00511746	-0.14168	0.244841	-0.632514	0.025775	-0.324215	0.0480234
Q15785	Mitochondrial import receptor subunit TOM34	-0.182346	0.262965	0.0646182	0.523849	0.246964	0.266119	-0.0835602	0.475703	-0.163611	0.174771	0.0700518	0.417492	0.293365	0.063268	0.0800506	0.543205
P14550	Aldo-keto reductase family 1 member A1	-0.202386	0.263406	0.0237421	0.953585	0.226128	0.648532	-0.111935	0.593402	0.213138	0.296328	-0.252169	0.283618	-0.38474	0.162774	-0.325073	0.118745
Q8WWM7	Ataxin-2-like protein	0.163816	0.263416	-0.0700058	0.631398	-0.233822	0.227945	0.0702874	0.528097	0.419917	0.000388086	-0.231323	0.0230207	-0.543415	0.00109107	-0.349629	0.00920713
B0I1T2	Unconventional myosin-Ig	0.279679	0.263724	0.00462902	0.991848	-0.27505	0.510749	0.169659	0.495596	0.777445	0.00136201	-0.439173	0.0843044	-0.836609	0.0618666	-0.607786	0.0147166
Q96SB4	SRSF protein kinase 1	0.172077	0.263914	0.036547	0.79867	-0.13553	0.612002	0.117865	0.331467	-0.107734	0.280806	0.280784	0.0572395	0.19182	0.144402	0.225599	0.0295996
P49368	T-complex protein 1 subunit gamma	0.114136	0.263932	-0.016654	0.893371	-0.13079	0.327814	0.0618198	0.495335	0.289247	0.00123525	-0.127105	0.160996	-0.350964	0.00622741	-0.227427	0.00396829
P35579	Myosin-9	0.361653	0.264226	-0.264047	0.476567	-0.6257	0.234111	0.111373	0.672182	0.676919	0.00203996	-0.411001	0.0485672	-0.914861	0.0370991	-0.565547	0.0400149
Q9UMX5	Neudesin	-0.201197	0.264321	0.125114	0.589295	0.326311	0.204599	-0.0706722	0.672633	-0.0781353	0.617934	-0.0313299	0.817058	0.22314	0.275917	0.00746308	0.959643
A0A075B6K4	Immunoglobulin lambda variable 3-10	-0.866846	0.264335	0.29857	0.601684	1.16542	0.181506	-0.167597	0.752056	-0.506022	0.287329	-0.0624101	0.304825	0.665072	0.66415	0.338425	0.517987
P62070	Ras-related protein R-Ras2	0.157597	0.264664	0.137042	0.416105	-0.0205549	0.975277	0.149375	0.159899	0.0669543	0.45296	0.0679043	0.796863	0.0175199	0.919312	0.082421	0.463233
Q9BQI0	Allograft inflammatory factor 1-like	-0.278467	0.265157	-0.400723	0.327887	-0.122256	0.733706	-0.351821	0.204488	-0.12494	0.66763	-0.00537877	0.522393	-0.0781715	0.70827	-0.226881	0.423224
P40222	Alpha-taxilin	0.196021	0.265205	-0.0800964	0.721842	-0.276117	0.321231	0.0855739	0.539474	0.489881	0.000500621	-0.227475	0.155659	-0.645899	0.0211437	-0.404307	0.0175791
Q969P0	Immunoglobulin superfamily member 8	-0.316925	0.265413	0.170497	0.574644	0.487421	0.0630119	-0.121956	0.624785	-0.278281	0.193304	-0.00795258	0.476477	0.536877	0.125483	0.156325	0.415499
P18124	60S ribosomal protein L7	0.283171	0.26561	-0.050339	0.861834	-0.33351	0.29039	0.149767	0.503288	0.498977	0.021169	-0.143643	0.429074	-0.769965	0.0202697	-0.34921	0.0616666
Q86UE4	Protein LYRIC	0.195054	0.265702	-0.257621	0.267972	-0.452675	0.149049	0.0139841	0.927668	0.516868	0.00324399	-0.207893	0.201868	-1.01922	0.00272121	-0.502884	0.0125412
Q99747	Gamma-soluble NSF attachment protein	0.253299	0.266227	0.0788489	0.833762	-0.17445	0.909416	0.183519	0.345212	0.286745	0.0194947	-0.00811828	0.406362	-0.314801	0.453434	-0.103226	0.587666
O95782	AP-2 complex subunit alpha-1	0.31891	0.266425	-0.100907	0.766883	-0.419818	0.389473	0.150983	0.509598	0.653988	0.00114816	-0.374055	0.0452827	-0.888474	0.0318085	-0.503005	0.0380816
P11678	Eosinophil peroxidase	1.12861	0.266924	0.918654	#DIV/0!	-0.209958	#DIV/0!	1.08662	0.169308	1.92136	0.167941	-1.12173	0.534631	-0.673727	#DIV/0!	-0.834741	0.530944
Q14108	Lysosome membrane protein 2	-0.148785	0.267069	0.378111	0.196973	0.526896	0.0821025	0.0619732	0.716852	0.0513227	0.708423	-0.101072	0.366506	0.235798	0.258332	0.0106504	0.941733
P19525	Interferon-induced, double-stranded RNA-activated protein kinase	-0.28218	0.267154	-0.275257	0.329563	0.00692391	0.978189	-0.278026	0.217258	0.656898	0.0204816	-0.880048	0.260304	-0.991806	0.047711	-0.934924	0.00101929
Q9Y2X7	ARF GTPase-activating protein GIT1	-0.142527	0.267494	0.0283443	0.927047	0.170872	0.726496	-0.0741787	0.618822	0.199326	0.101758	-0.258168	0.0767321	-0.214868	0.376673	-0.273505	0.0613127
Q14257	Reticulocalbin-2	-0.264214	0.267788	-0.269445	0.25944	-0.0052309	0.913803	-0.267353	0.26162	-0.217536	0.370192	-0.0437503	0.602366	-0.162859	0.338438	-0.0498169	0.606607
Q14571	Inositol 1,4,5-trisphosphate receptor type 2	0.15331	0.26809	0.115192	0.542176	-0.0381183	0.696113	0.138063	0.306271	0.170293	0.18622	-0.0283154	0.988698	-0.0273166	0.665546	-0.0322302	0.697013
O75369	Filamin-B	0.274905	0.268307	-0.0083052	0.982987	-0.28321	0.628755	0.161621	0.466904	0.346088	0.0821264	-0.170958	0.19483	-0.336749	0.399813	-0.184467	0.416545
Q13435	Splicing factor 3B subunit 2	0.247823	0.268424	-0.207856	0.428943	-0.455679	0.27033	0.0655513	0.712648	0.485739	0.000318786	-0.289555	0.048682	-0.754903	0.0172544	-0.420188	0.0306967
O00763	Acetyl-CoA carboxylase 2	0.262036	0.26843	-0.392496	0.340506	-0.654531	0.156295	-0.130683	0.679118	-0.301851	0.235638	0.756733	0.121894	-0.151682	0.16046	0.171168	0.534502
P55789	FAD-linked sulfhydryl oxidase ALR	-0.248968	0.268647	0.0917311	0.6751	0.340699	0.372978	-0.112688	0.528328	-0.172904	0.20477	-0.0240005	0.710113	0.19988	0.422555	0.0602159	0.68998
Q27J81	Inverted formin-2	0.106039	0.269014	0.052363	0.723421	-0.053676	0.597933	0.0845686	0.376952	0.246947	0.0189186	-0.115156	0.0971114	-0.192914	0.0159988	-0.162378	0.0544581
Q9Y4K3	TNF receptor-associated factor 6	0.0609578	0.269109	-0.0662444	0.246916	-0.127202	0.0471956	0.0100769	0.829692	-0.000510632	0.991598	0.0339983	0.625826	-0.0344636	0.57776	0.0105875	0.842249
Q9UBP0	Spastin	-0.316509	0.269288	-0.565438	#DIV/0!	-0.248928	#DIV/0!	-0.366295	0.207119	-0.407633	0.173956	0.183408	0.0848462	-0.250089	#DIV/0!	0.0413377	0.762428
O43813	Glutathione S-transferase LANCL1	0.0958447	0.269675	0.116708	0.501797	0.0208638	0.667223	0.10419	0.226111	-0.116156	0.0544981	0.209625	0.100447	0.212083	0.276587	0.220347	0.009472
P21589	5'-nucleotidase	-0.190019	0.269797	-0.136778	0.486613	0.0532414	0.926698	-0.168722	0.264105	-0.1431	0.366222	-0.0125814	0.78777	0.0814716	0.418614	-0.0256227	0.845728
Q8N2K0	Lysophosphatidylserine lipase ABHD12	0.198862	0.269871	0.244158	0.186514	0.0452965	0.613939	0.22604	0.208271	0.444038	0.0488034	-0.136054	0.43125	-0.421922	0.370002	-0.217998	0.134951
Q9UNM6	26S proteasome non-ATPase regulatory subunit 13	0.134039	0.270053	0.0338977	0.821548	-0.100141	0.412554	0.0939822	0.433877	0.338215	0.00914349	-0.196394	0.000491426	-0.309647	0.0351057	-0.244233	0.000747543
O14979	Heterogeneous nuclear ribonucleoprotein D-like	0.271672	0.270519	-0.319391	0.233648	-0.591063	0.148304	0.0352468	0.861907	0.502756	0.00129266	-0.280132	0.0628595	-0.911956	0.0169764	-0.467509	0.0287731
P51991	Heterogeneous nuclear ribonucleoprotein A3	0.273197	0.270803	-0.227154	0.282949	-0.500351	0.205284	0.0730565	0.685476	0.242867	0.0863598	0.084956	0.95989	-0.662791	0.0183456	-0.16981	0.397145
Q16513	Serine/threonine-protein kinase N2	0.152256	0.27089	0.209424	0.119958	0.0571686	0.937051	0.175123	0.126284	0.116383	0.316877	0.0520292	0.53507	0.046818	0.835936	0.0587405	0.554263
Q9UN70	Protocadherin gamma-C3	-0.135135	0.271138	0.309306	0.0389418	0.444441	0.00370543	0.131529	0.410428	-0.163368	0.363228	-0.0154702	0.304451	0.681618	0.195928	0.294897	0.12523
Q6UVK1	Chondroitin sulfate proteoglycan 4	0.196554	0.271554	-0.0110039	0.950805	-0.207558	0.433805	0.113531	0.466056	0.0215272	0.892534	0.0060059	0.511452	0.18281	0.357175	0.0920036	0.489652
O60218	Aldo-keto reductase family 1 member B10	0.337317	0.271567	-0.458432	0.339198	-0.795749	0.130741	0.0190174	0.953751	0.0703689	0.843757	0.548309	0.203508	-0.851069	0.109887	-0.0513516	0.876728
O00264	Membrane-associated progesterone receptor component 1	-0.171021	0.271596	-0.195573	0.560971	-0.0245513	0.842917	-0.180842	0.244177	-0.387045	0.00698536	0.358829	0.128426	0.0411901	0.900252	0.206203	0.23082
Q96D96	Voltage-gated hydrogen channel 1	0.40956	0.271961	-0.746173	0.0121349	-1.15573	0.00617438	-0.0527329	0.879092	-0.0714964	0.79667	0.508997	0.32521	-0.697354	0.0685059	0.0187636	0.947528
O60244	Mediator of RNA polymerase II transcription subunit 14	-0.219182	0.272185	-0.218865	0.305848	0.000317328	0.686024	-0.219055	0.217005	-0.285152	0.0969721	0.0384184	0.849429	0.165418	0.402486	0.0660974	0.559569
Q9NVJ2	ADP-ribosylation factor-like protein 8B	0.159841	0.272201	-0.0777479	0.518492	-0.237589	0.217603	0.0648052	0.590314	0.0824245	0.482824	0.121435	0.200352	-0.201471	0.236435	-0.0176193	0.869964
P08729	Keratin, type II cytoskeletal 7	-0.82589	0.272854	0.597175	0.613359	1.42307	0.172435	-0.256664	0.749825	0.193785	0.829575	-1.13791	0.164977	0.312915	0.691486	-0.450449	0.552774
Q05519	Serine/arginine-rich splicing factor 11	0.144873	0.273037	-0.0589785	0.680023	-0.203852	0.132675	0.0633324	0.62064	0.324208	0.0183843	-0.0910833	0.384464	-0.4599	0.00648	-0.260876	0.0035152
Q5T6V5	Queuosine salvage protein	-0.179025	0.2733	0.214705	0.16476	0.39373	0.0816098	-0.0215332	0.879928	0.19116	0.122275	-0.227835	0.129357	-0.0988388	0.590693	-0.212693	0.10445
P41567	Eukaryotic translation initiation factor 1	0.16789	0.273345	-0.146364	0.313418	-0.314254	0.0166095	0.0421885	0.776638	0.20733	0.22148	0.0834755	0.49281	-0.53416	0.0405877	-0.165142	0.197737
Q9NYF8	Bcl-2-associated transcription factor 1	0.329196	0.273378	-0.257085	0.541636	-0.586281	0.310868	0.0946838	0.712313	0.576162	0.00351955	-0.334992	0.150052	-0.905115	0.0532657	-0.481478	0.0723107
Q5T8D3	Acyl-CoA-binding domain-containing protein 5	0.162304	0.273426	0.188404	0.374052	0.0260999	0.975243	0.172744	0.15917	0.192523	0.0234903	-0.0654829	0.854783	0.0366275	0.858204	-0.0197789	0.845131
Q9UID3	Vacuolar protein sorting-associated protein 51 homolog	0.123359	0.273713	0.161544	0.232121	0.038185	0.989227	0.138633	0.158017	0.118598	0.237487	0.061101	0.484617	0.00446256	0.945315	0.020035	0.81701
O95833	Chloride intracellular channel protein 3	-0.377884	0.274062	-0.710194	0.0307931	-0.33231	0.280877	-0.510808	0.0641745	-0.722083	0.0259077	0.333662	0.180986	0.241753	0.69971	0.211275	0.477994
P14618	Pyruvate kinase PKM	0.194003	0.27409	0.103364	0.446013	-0.0906393	0.175123	0.157748	0.283397	0.312976	0.0358893	-0.197061	0.339581	-0.176456	0.0680631	-0.155228	0.111509
Q13045	Protein flightless-1 homolog	0.137197	0.274223	-0.149467	0.277869	-0.286664	0.0467825	0.0225312	0.850054	0.279347	0.0149913	-0.170368	0.0337297	-0.398316	0.053627	-0.256816	0.00911794
Q5H9R7	Serine/threonine-protein phosphatase 6 regulatory subunit 3	0.199056	0.274396	-0.0232955	0.879247	-0.222352	0.133022	0.110116	0.479725	0.425527	0.0116116	-0.158819	0.360284	-0.439286	0.0256177	-0.315412	0.014349
P61163	Alpha-centractin	0.106753	0.274713	-0.0190288	0.760339	-0.125782	0.124552	0.0564405	0.412362	0.00344093	0.948331	0.0886201	0.0450637	0.0108461	0.842383	0.0529996	0.415532
Q9NZB2	Constitutive coactivator of PPAR-gamma-like protein 1	0.138442	0.274888	-0.0770746	0.335191	-0.215517	0.0981399	0.0522356	0.597872	0.318752	0.00278693	-0.175056	0.31069	-0.485222	0.00854483	-0.266516	0.00901012
Q9GZQ3	COMM domain-containing protein 5	-0.330943	0.274896	-0.113995	0.702653	0.216948	0.523533	-0.200774	0.356059	-0.127374	0.459908	-0.121916	0.167445	0.0411729	0.0142095	-0.0734009	0.689576
Q8N6G6	ADAMTS-like protein 1	-1.31042	0.27509	1.43784	0.482895	2.74826	0.221554	0.338538	0.818565	-0.995361	0.514805	1.30336	0.447388	1.96956	0.554488	1.3339	0.430437
Q01415	N-acetylgalactosamine kinase	0.235601	0.275207	0.019078	0.951646	-0.216523	0.429809	0.148992	0.428377	0.388433	0.0237867	-0.071357	0.9856	-0.572384	0.0987457	-0.239441	0.2029
P84095	Rho-related GTP-binding protein RhoG	0.322435	0.275411	-0.133218	0.665579	-0.455653	0.341844	0.140174	0.555829	0.574909	0.0116622	-0.185338	0.167313	-0.870391	0.0599091	-0.434735	0.07507
Q86TB9	Protein PAT1 homolog 1	0.169025	0.275503	0.0204705	0.871517	-0.148555	0.663982	0.109603	0.297596	0.378169	2.96455e-05	-0.201145	0.0750747	-0.412724	0.0118736	-0.268565	0.0217798
Q96EY7	Pentatricopeptide repeat domain-containing protein 3, mitochondrial	0.188821	0.275689	0.069963	0.737179	-0.118858	0.25962	0.141278	0.36791	0.416122	0.0126453	-0.345464	0.0642539	-0.330864	0.149252	-0.274844	0.0352289
P08758	Annexin A5	-0.161318	0.275826	0.265729	0.438643	0.427047	0.211627	0.00950122	0.957616	-0.0795887	0.603979	-0.0713483	0.522249	0.343938	0.232368	0.0890899	0.606065
Q86VF7	Nebulin-related-anchoring protein	0.417064	0.275947	-0.331327	0.46896	-0.748391	0.152357	0.117708	0.706037	0.0205233	0.943738	0.19036	0.434393	-0.281722	0.17004	0.0971843	0.78608
Q16853	Membrane primary amine oxidase	-0.598049	0.275993	-0.0105468	0.978261	0.587502	0.576137	-0.363048	0.370071	-0.847997	0.0350907	0.421652	0.119832	0.910278	0.151169	0.484949	0.224233
P37108	Signal recognition particle 14 kDa protein	-0.308778	0.276537	-0.00336592	0.994394	0.305412	0.520632	-0.186613	0.54415	0.409752	0.284098	-0.338829	0.24447	-0.459864	0.00972106	-0.596365	0.0736702
P51649	Succinate-semialdehyde dehydrogenase, mitochondrial	0.247365	0.276652	-0.0947727	0.801286	-0.342138	0.269317	0.11051	0.655156	0.237362	0.357379	-0.125475	0.476782	-0.439081	0.177421	-0.126851	0.516414
P08754	Guanine nucleotide-binding protein G(i) subunit alpha-3	0.173285	0.276743	0.0148022	0.950809	-0.158483	0.74671	0.109892	0.413175	0.240539	0.0145606	-0.00744574	0.537788	-0.292113	0.177747	-0.130647	0.322177
P80217	Interferon-induced 35 kDa protein	0.353142	0.27676	-0.11452	0.806781	-0.467662	0.291819	0.166077	0.589659	1.12509	0.000630637	-0.814017	0.0120495	-1.25495	0.0499326	-0.959009	0.00166107
Q07666	KH domain-containing, RNA-binding, signal transduction-associated protein 1	0.184801	0.276835	-0.344612	0.015403	-0.529413	0.0223893	-0.026964	0.865022	0.434535	0.00313325	-0.179061	0.143713	-0.918735	0.00113019	-0.461499	0.00349481
Q02878	60S ribosomal protein L6	0.238884	0.276844	-0.0375602	0.888862	-0.276445	0.391481	0.128307	0.504035	0.421859	0.0177773	-0.182424	0.165553	-0.56589	0.0198724	-0.293552	0.0769591
P04259	Keratin, type II cytoskeletal 6B	0.518021	0.276848	-1.35969	0.0466251	-1.87771	0.0306983	-0.233062	0.66755	-0.617008	0.209501	0.988582	0.0902592	-0.205295	0.657942	0.383946	0.429131
P22528	Cornifin-B	0.502007	0.276959	-0.768922	0.0411672	-1.27093	0.0244982	-0.00636469	0.987894	-0.0335339	0.935313	0.332169	0.764604	-0.317115	0.648831	0.0271692	0.946413
Q9BX68	Adenosine 5'-monophosphoramidase HINT2	-0.18722	0.277189	-0.0634925	0.815818	0.123728	0.754128	-0.137729	0.407393	-0.0820558	0.542914	-0.0773062	0.744929	-0.07452	0.737528	-0.0556733	0.643477
Q9NRX4	14 kDa phosphohistidine phosphatase	-0.572883	0.277218	-0.0318698	0.950089	0.541013	0.717472	-0.356478	0.358992	-0.495441	0.0809279	-0.180781	0.35775	0.608888	0.156818	0.138964	0.699248
Q9Y2A7	Nck-associated protein 1	0.179633	0.277232	-0.0957405	0.757632	-0.275373	0.458749	0.0694836	0.668959	0.191021	0.132614	-0.0297113	0.704519	-0.307123	0.274267	-0.121537	0.448273
Q9NSD9	Phenylalanine--tRNA ligase beta subunit	0.107027	0.277386	0.0542395	0.723098	-0.0527875	0.958119	0.085912	0.298229	0.121251	0.0606209	-0.0565453	0.324543	-0.0424419	0.747964	-0.0353391	0.676784
Q7Z7G0	Target of Nesh-SH3	-0.441843	0.277536	-0.049362	0.898138	0.392481	0.619497	-0.284851	0.347094	-0.644277	0.0426345	0.228725	0.265357	0.755976	0.0565572	0.359426	0.29301
O15260	Surfeit locus protein 4	0.264411	0.277545	-0.0764661	0.844215	-0.340878	0.334079	0.12806	0.571483	0.75252	0.0015899	-0.380698	0.222906	-1.12006	0.0165423	-0.624459	0.0134043
Q969H8	Myeloid-derived growth factor	-0.45331	0.27761	0.201868	0.706964	0.655178	0.209017	-0.0602031	0.894545	0.274709	0.558839	-0.496495	0.391027	-0.166953	0.763877	-0.334912	0.399055
Q8NEZ5	F-box only protein 22	-0.123199	0.277918	-0.0283016	0.7683	0.0948977	0.487503	-0.0852402	0.389904	0.0549615	0.569213	-0.164652	0.271517	-0.036086	0.17977	-0.140202	0.0325886
P35443	Thrombospondin-4	-0.296792	0.278131	-0.00691822	0.989014	0.289873	0.842748	-0.180842	0.484594	-0.407785	0.0536556	0.102362	0.324522	0.468662	0.201982	0.226943	0.387078
Q8TDQ7	Glucosamine-6-phosphate isomerase 2	-0.0867529	0.278475	0.118587	0.51047	0.20534	0.246282	-0.00461688	0.957912	0.0109706	0.906094	0.0902196	0.636557	-0.0620582	0.784958	-0.0155874	0.890262
O75886	Signal transducing adapter molecule 2	0.183488	0.278489	-0.0756146	#DIV/0!	-0.259103	#DIV/0!	0.131668	0.384403	0.374956	0.0228354	-0.25021	0.135452	-0.391829	#DIV/0!	-0.243289	0.133719
P42167	Lamina-associated polypeptide 2, isoforms beta/gamma	0.449569	0.278902	-0.0680105	0.874677	-0.51758	0.350008	0.242537	0.428383	0.824419	0.000504192	-0.457513	0.309031	-1.00601	0.0519783	-0.581882	0.0686321
Q9BWD1	Acetyl-CoA acetyltransferase, cytosolic	0.32259	0.279177	-0.19294	0.628629	-0.515531	0.419912	0.116378	0.643942	0.272572	0.142353	0.0615951	0.379248	-0.486241	0.296852	-0.156194	0.518414
P08621	U1 small nuclear ribonucleoprotein 70 kDa	0.25843	0.279311	-0.391537	0.211126	-0.649968	0.102202	-0.00155695	0.994234	0.483487	0.00421639	-0.20406	0.36127	-1.04161	0.00836309	-0.485044	0.0296182
Q9UHX1	Poly(U)-binding-splicing factor PUF60	0.189068	0.279539	-0.169114	0.41697	-0.358182	0.251428	0.0457955	0.751168	0.423496	0.000571457	-0.168715	0.0841554	-0.723303	0.0221572	-0.3777	0.015776
Q9H9Q2	COP9 signalosome complex subunit 7b	-0.165946	0.279611	-0.0348039	0.838592	0.131143	0.48162	-0.0872609	0.487066	0.079176	0.425538	-0.295785	0.175828	-0.0716376	0.40168	-0.166437	0.131303
Q8N4A0	Polypeptide N-acetylgalactosaminyltransferase 4	-0.70297	0.279673	0.0755305	0.887843	0.778501	0.260078	-0.23587	0.624216	-0.271968	0.55754	-0.713575	0.548924	0.53829	0.422916	0.0360984	0.932311
Q12824	SWI/SNF-related matrix-associated actin-dependent regulator of chromatin subfamily B member 1	0.184116	0.279699	-0.0827267	0.707132	-0.266843	0.446877	0.077379	0.569086	0.261563	0.012809	0.00892479	0.689645	-0.454662	0.0413672	-0.184184	0.203633
Q96N66	Lysophospholipid acyltransferase 7	-0.0768788	0.279716	0.068908	#DIV/0!	0.145787	#DIV/0!	-0.0477214	0.481934	-0.0815442	0.568919	0.053456	0.772206	0.101662	#DIV/0!	0.0338228	0.810941
Q7Z434	Mitochondrial antiviral-signaling protein	0.182901	0.280329	0.11333	0.754866	-0.0695703	0.707753	0.155073	0.414205	0.177822	0.261452	-0.0547533	0.956103	-0.0851285	0.822971	-0.0227493	0.874668
Q15287	RNA-binding protein with serine-rich domain 1	0.453683	0.280343	-0.334725	0.484502	-0.788408	0.288085	0.13832	0.676596	0.723779	0.00720467	-0.370598	0.173164	-1.22126	0.024961	-0.585459	0.101193
P01116	GTPase KRas	0.1822	0.280648	-0.0230151	0.903211	-0.205215	0.544216	0.100114	0.43181	0.133696	0.192985	0.106617	0.755975	-0.21012	0.56941	-0.0335823	0.804317
Q9NZT1	Calmodulin-like protein 5	0.654987	0.280973	0.242814	0.559429	-0.412172	0.682162	0.490118	0.236082	-0.717544	0.0551686	1.49285	0.135309	1.01657	0.047129	1.20766	0.0100767
Q96JY6	PDZ and LIM domain protein 2	-0.0871663	0.281097	0.00101009	0.993209	0.0881764	0.340948	-0.0518957	0.463183	-0.247574	0.023485	0.0904754	0.318875	0.447524	0.0825931	0.195678	0.0751882
Q9H307	Pinin	0.230039	0.281439	-0.136288	0.603087	-0.366327	0.365697	0.0835085	0.62268	0.392848	0.00254009	-0.228162	0.109566	-0.583826	0.0511871	-0.309339	0.0856567
P62714	Serine/threonine-protein phosphatase 2A catalytic subunit beta isoform	-0.182141	0.281664	-0.204579	0.180066	-0.0224386	0.848185	-0.191116	0.113936	-0.219963	0.0149349	0.0306171	0.879304	-0.00594181	0.972178	0.0288466	0.778887
Q9BUT1	3-hydroxybutyrate dehydrogenase type 2	-0.175335	0.281832	0.186431	0.257261	0.361766	0.091688	-0.0306287	0.837129	-0.0807839	0.62813	0.0797669	0.470852	0.0845959	0.57285	0.0501552	0.74636
Q9Y4F5	Centrosomal protein of 170 kDa protein B	0.193651	0.28192	-0.540933	#DIV/0!	-0.734583	#DIV/0!	0.046734	0.832357	0.052001	0.8101	0.108729	0.81103	-0.560013	#DIV/0!	-0.00526706	0.982532
Q6IQ49	Replication stress response regulator SDE2	0.192345	0.282394	0.0193476	0.913662	-0.172998	0.760743	0.123146	0.329048	0.176073	0.0714231	0.0991144	0.934845	-0.285047	0.227384	-0.0529272	0.698148
Q9BVM4	Gamma-glutamylaminecyclotransferase	-0.297237	0.282874	0.00169743	0.995351	0.298934	0.602118	-0.177663	0.44643	-0.145326	0.483004	0.0707968	0.202621	0.0237883	0.943985	-0.0323366	0.86146
P14324	Farnesyl pyrophosphate synthase	-0.176477	0.282876	-0.117033	0.432405	0.0594446	0.86113	-0.152699	0.209257	-0.00805682	0.958376	-0.0136449	0.938294	-0.256191	0.41608	-0.144643	0.371785
Q99766	ATP synthase subunit s, mitochondrial	0.204396	0.282995	0.0947184	0.785522	-0.109678	0.630435	0.160525	0.43484	0.297244	0.230409	-0.243556	0.275652	-0.33939	0.222548	-0.136719	0.525021
P62269	40S ribosomal protein S18	0.206478	0.283154	-0.0837431	0.671194	-0.290221	0.106702	0.0903897	0.619678	0.327284	0.0923515	-0.011809	0.994017	-0.40811	0.231596	-0.236894	0.0791624
O75342	Arachidonate 12-lipoxygenase, 12R-type	0.234788	0.283255	0.180698	0.562761	-0.0540906	0.928051	0.213152	0.319854	-0.173634	0.466075	0.509905	0.109868	0.428866	0.11609	0.386787	0.0563152
Q12802	A-kinase anchor protein 13	-0.152386	0.283475	0.222689	0.296921	0.375075	0.0986023	-0.00235571	0.98779	0.0372902	0.820877	-0.116176	0.486572	0.283519	0.132349	-0.0396459	0.782605
Q13510	Acid ceramidase	-0.23329	0.28388	0.167526	0.48352	0.400816	0.134393	-0.0729638	0.713981	-0.00983479	0.958365	-0.0982743	0.472364	0.161107	0.56843	-0.063129	0.698958
Q15582	Transforming growth factor-beta-induced protein ig-h3	-0.176011	0.284385	0.0566882	0.772893	0.232699	0.220242	-0.0829313	0.564286	-0.217226	0.224414	0.1184	0.699373	0.351431	0.0903083	0.134295	0.438495
P53582	Methionine aminopeptidase 1	-0.197376	0.284603	-0.175745	0.460457	0.0216306	0.928547	-0.184397	0.188731	0.0684213	0.488233	-0.176033	0.0147639	-0.29626	0.311029	-0.252819	0.10079
O75339	Cartilage intermediate layer protein 1	-0.453422	0.284676	-0.376862	0.379459	0.0765601	0.662768	-0.422798	0.189277	-1.04913	0.00243579	0.62198	0.175184	0.932266	0.0454355	0.626336	0.0656131
Q9Y5S2	Serine/threonine-protein kinase MRCK beta	0.167442	0.28472	-0.0628338	0.779001	-0.230275	0.387668	0.0753314	0.593282	0.29445	0.0416733	-0.164304	0.393012	-0.383237	0.163965	-0.219119	0.144408
Q8ND04	Nonsense-mediated mRNA decay factor SMG8	-0.364434	0.284818	-0.696801	#DIV/0!	-0.332367	#DIV/0!	-0.430907	0.215927	-0.537979	0.129269	0.142127	0.413783	-0.127404	#DIV/0!	0.107072	0.353789
P42696	RNA-binding protein 34	0.289269	0.284992	-0.0969104	#DIV/0!	-0.386179	#DIV/0!	0.212033	0.345256	0.415034	0.0466367	-0.247047	0.707265	-0.390662	#DIV/0!	-0.203001	0.40577
A1X283	SH3 and PX domain-containing protein 2B	0.166474	0.285018	0.0308394	0.917593	-0.135634	0.704726	0.11222	0.43354	0.376454	0.00342938	-0.0991825	0.635613	-0.539789	0.0984602	-0.264234	0.111382
P01889	HLA class I histocompatibility antigen, B alpha chain	-0.22984	0.285228	-0.154444	0.702093	0.0753953	0.692365	-0.199681	0.374649	0.255585	0.222641	-0.452973	0.016843	-0.380102	0.329546	-0.455266	0.0250504
O60216	Double-strand-break repair protein rad21 homolog	0.228676	0.285505	-0.162183	0.578284	-0.390859	0.348976	0.0723323	0.683282	0.326607	0.0126629	-0.178995	0.251005	-0.482442	0.0697791	-0.254275	0.170381
Q9Y223	Bifunctional UDP-N-acetylglucosamine 2-epimerase/N-acetylmannosamine kinase	-0.617006	0.285955	-0.00449184	0.996395	0.612514	0.549219	-0.249497	0.698035	0.133205	0.787335	-0.862707	0.318671	-0.180203	0.837145	-0.382702	0.524055
Q04917	14-3-3 protein eta	0.18595	0.285978	-0.0219221	0.894878	-0.207873	0.536862	0.102801	0.466079	0.393454	0.00306509	-0.195596	0.0213987	-0.430323	0.0700729	-0.290653	0.0176237
Q9NTZ6	RNA-binding protein 12	0.187102	0.286161	-0.184854	0.345745	-0.371955	0.195669	0.0383195	0.793764	0.38029	0.00132449	-0.175489	0.153311	-0.630561	0.0100185	-0.341971	0.0193369
P46100	Transcriptional regulator ATRX	-0.140013	0.286195	-0.142018	0.595473	-0.00200474	0.893972	-0.140815	0.329507	-0.1031	0.425375	0.0304657	0.399028	-0.060305	0.747667	-0.0377151	0.739747
O95352	Ubiquitin-like modifier-activating enzyme ATG7	-0.118055	0.286306	0.0805395	0.593113	0.198594	0.392774	-0.0386171	0.698966	0.190986	0.0279917	-0.255198	0.00448812	-0.164531	0.363103	-0.229603	0.018528
Q13496	Myotubularin	-0.0827155	0.286339	0.00353804	0.981254	0.0862535	0.56862	-0.0309634	0.748912	-0.0120275	0.873971	-0.0315752	0.641492	-0.0974677	0.399644	-0.0189358	0.830891
P02679	Fibrinogen gamma chain	-0.295733	0.286503	0.273002	0.492103	0.568735	0.150035	-0.0682391	0.804441	-0.0938684	0.769316	-0.0358431	0.855307	0.207043	0.684214	0.0256292	0.932098
Q9BY43	Charged multivesicular body protein 4a	-0.165563	0.28663	-0.158752	0.211728	0.0068101	0.896106	-0.162838	0.183951	0.0830642	0.506319	-0.203743	0.331608	-0.229045	0.190799	-0.245903	0.0331647
O60264	SWI/SNF-related matrix-associated actin-dependent regulator of chromatin subfamily A member 5	0.193866	0.286863	-0.18303	0.443396	-0.376896	0.219708	0.0431079	0.782727	0.517917	0.000384077	-0.279244	0.0670714	-0.843239	0.00321872	-0.474809	0.00722595
Q0VD83	Apolipoprotein B receptor	0.208287	0.287076	-0.131713	0.637019	-0.34	0.234438	0.0722872	0.714484	0.596765	0.00579841	-0.352608	0.137136	-0.750413	0.000190394	-0.524477	0.00344223
A6NI72	Putative neutrophil cytosol factor 1B	0.253738	0.287214	-0.062374	0.815049	-0.316112	0.247539	0.127293	0.549214	1.07968	0.000207768	-0.732669	0.0570302	-1.28641	0.00262308	-0.952384	0.000359499
Q96BH1	E3 ubiquitin-protein ligase RNF25	0.147943	0.287235	0.0595122	0.76243	-0.0884305	0.599347	0.11257	0.322774	0.126014	0.138083	0.0344651	0.51967	-0.0822523	0.71769	-0.0134437	0.902807
P62263	40S ribosomal protein S14	0.167357	0.287378	-0.172183	0.148215	-0.33954	0.0808732	0.0315412	0.814398	0.164014	0.244759	0.108543	0.5219	-0.41951	0.148543	-0.132473	0.316965
O75915	PRA1 family protein 3	0.157928	0.287419	0.12747	0.409759	-0.0304579	0.612549	0.145744	0.293644	0.0944472	0.530347	-0.0384993	0.913821	-0.00653982	0.945972	0.0512972	0.606982
Q9Y3I0	RNA-splicing ligase RtcB homolog	0.160049	0.287555	-0.157157	0.243617	-0.317206	0.140309	0.0331669	0.781854	0.313311	0.00215304	-0.193629	0.128166	-0.504743	0.0100535	-0.280144	0.0223678
O60565	Gremlin-1	0.491528	0.2884	0.0601734	0.898915	-0.431355	0.261241	0.318986	0.438806	0.795574	0.0653739	-0.201256	0.863614	-1.05233	0.0152187	-0.476588	0.136164
Q9Y450	HBS1-like protein	-0.168767	0.288612	0.153518	0.412815	0.322285	0.163174	-0.0398532	0.78967	-0.106711	0.531104	0.0167872	0.555671	0.324267	0.124342	0.0668581	0.669836
Q8N128	Protein FAM177A1	-0.191128	0.288859	0.3897	0.239358	0.580827	0.12682	0.0412031	0.844517	-0.0885334	0.639214	-0.108979	0.749889	0.635047	0.0356649	0.129737	0.473286
Q13769	THO complex subunit 5 homolog	0.297263	0.288968	-0.261752	0.602183	-0.559015	0.343585	0.073657	0.779102	0.617957	0.000420726	-0.453468	0.127325	-0.839772	0.123862	-0.5443	0.0466892
Q96KR1	Zinc finger RNA-binding protein	0.168647	0.289084	-0.06724	0.702289	-0.235887	0.455707	0.0742919	0.560783	0.274783	0.00826729	-0.0883437	0.197307	-0.424308	0.0272399	-0.200491	0.0966734
P27361	Mitogen-activated protein kinase 3	-0.14349	0.289196	-0.00866744	0.93679	0.134823	0.316216	-0.0895612	0.417706	-0.125386	0.355211	0.0702478	0.722612	0.143016	0.344792	0.0358246	0.76576
Q92623	Tetratricopeptide repeat protein 9A	0.351554	0.289632	0.0957658	0.626213	-0.255788	0.410108	0.198081	0.306636	-0.0788158	0.70419	0.48909	0.561288	0.311289	0.198727	0.276897	0.160592
O14896	Interferon regulatory factor 6	0.147121	0.289994	-0.276936	0.104301	-0.424057	0.0554625	-0.0225018	0.867924	-0.0314834	0.811849	0.260496	0.292609	-0.338155	0.0959833	0.00898164	0.948853
P02675	Fibrinogen beta chain	-0.279637	0.290208	0.233612	0.483513	0.513249	0.120624	-0.074337	0.770853	-0.0597987	0.854878	-0.0155163	0.909191	0.0604277	0.897286	-0.0145383	0.961493
Q7Z7H5	Transmembrane emp24 domain-containing protein 4	-0.18152	0.29031	0.165583	0.655901	0.347103	0.368789	-0.0426785	0.832202	0.297982	0.2289	-0.486038	0.24836	-0.262928	0.332786	-0.340661	0.165061
Q9H1K0	Rabenosyn-5	-0.237668	0.290389	-0.283387	#DIV/0!	-0.0457187	#DIV/0!	-0.246812	0.267553	-0.406913	0.0908257	0.243817	0.15329	0.0489532	#DIV/0!	0.160101	0.106246
O95785	Protein Wiz	-0.131064	0.29052	-0.064019	0.50955	0.067045	0.52943	-0.090837	0.327331	0.00110867	0.99076	-0.181044	0.0871173	-0.0544897	0.404123	-0.0919456	0.204277
P04440	HLA class II histocompatibility antigen, DP beta 1 chain	0.414813	0.290785	-0.11701	0.771663	-0.531823	0.33791	0.202084	0.550872	0.856462	0.0105596	-0.484171	0.144497	-0.907792	0.0949183	-0.654378	0.0213952
O95721	Synaptosomal-associated protein 29	0.116443	0.290875	-0.187525	0.113244	-0.303968	0.0407201	-0.00514436	0.961357	-0.000706017	0.99426	0.222954	0.115531	-0.252936	0.0675965	-0.00443835	0.961715
Q8ND56	Protein LSM14 homolog A	0.274244	0.290977	-0.402924	#DIV/0!	-0.677168	#DIV/0!	0.13881	0.578548	0.394882	0.0385731	-0.0163703	0.757611	-0.902074	#DIV/0!	-0.256072	0.315681
Q9P0J7	E3 ubiquitin-protein ligase KCMF1	-0.082134	0.290997	0.0196498	0.903822	0.101784	0.550369	-0.0210637	0.828404	0.0649849	0.357125	-0.0886368	0.401778	-0.0114558	0.947134	-0.0860486	0.400699
P35270	Sepiapterin reductase	-0.252466	0.291089	0.258921	0.162711	0.511387	0.0151906	-0.0479113	0.818858	-0.129625	0.532301	0.0255544	0.368692	0.29144	0.239602	0.0817134	0.653181
Q7Z5L7	Podocan	-0.200949	0.291126	0.128019	0.544757	0.328969	0.300394	-0.0693618	0.678089	-0.00736986	0.966163	-0.141179	0.920006	0.149155	0.010829	-0.061992	0.712289
Q8N9M1	Uncharacterized protein C19orf47	0.272633	0.291365	0.404346	#DIV/0!	0.131712	#DIV/0!	0.298976	0.234701	0.450461	0.0848438	-0.286576	0.118255	0.0626342	#DIV/0!	-0.151485	0.245705
P20936	Ras GTPase-activating protein 1	-0.0918328	0.291592	-0.0531501	#DIV/0!	0.0386827	#DIV/0!	-0.0840962	0.31682	-0.101445	0.225228	0.0450813	0.295074	0.0128249	#DIV/0!	0.0173483	0.652572
P62937	Peptidyl-prolyl cis-trans isomerase A	0.144847	0.291948	-0.157494	0.404256	-0.30234	0.212734	0.0239104	0.858122	0.216955	0.0861905	-0.0116662	0.422812	-0.321644	0.277707	-0.193044	0.107294
Q96IF1	LIM domain-containing protein ajuba	0.0985564	0.292059	-0.0205602	0.832961	-0.119117	0.106422	0.0509098	0.538985	0.147022	0.182242	0.00744037	0.49262	-0.0841453	0.351374	-0.0961118	0.330165
Q8N138	ORM1-like protein 3	0.220202	0.292305	-0.245995	0.334614	-0.466198	0.135083	0.0337233	0.863208	0.230825	0.251157	0.0578649	0.668582	-0.664044	0.0474842	-0.197102	0.310563
Q9H3K6	BolA-like protein 2	0.281379	0.292439	0.114466	0.684611	-0.166913	0.307935	0.214614	0.367921	0.331698	0.159176	0.0929979	0.185543	-0.239109	0.448798	-0.117085	0.475239
O43633	Charged multivesicular body protein 2a	0.103211	0.292523	0.0226121	0.883529	-0.0805984	0.596006	0.0709712	0.469427	0.119964	0.211847	0.00263244	0.953324	-0.0550657	0.790755	-0.0489931	0.53215
P32322	Pyrroline-5-carboxylate reductase 1, mitochondrial	-0.393379	0.292632	0.0456088	0.948181	0.438987	0.571093	-0.217784	0.582652	0.00602601	0.989211	-0.423598	0.636428	-0.14879	0.773754	-0.22381	0.602927
Q9BV40	Vesicle-associated membrane protein 8	0.194249	0.292852	-0.189043	0.639703	-0.383292	0.425049	0.0409319	0.839807	0.319682	0.0576881	-0.0718906	0.543056	-0.494694	0.378355	-0.278751	0.174711
O43353	Receptor-interacting serine/threonine-protein kinase 2	0.0823881	0.292974	0.0396874	#DIV/0!	-0.0427007	#DIV/0!	0.0738479	0.330078	0.337797	0.0017258	-0.246934	0.188674	-0.306584	#DIV/0!	-0.263949	0.000101684
Q9UBL3	Set1/Ash2 histone methyltransferase complex subunit ASH2	0.257542	0.292995	-0.18646	0.604988	-0.444003	0.280465	0.0799414	0.734028	0.469337	0.017815	-0.229897	0.320075	-0.656055	0.0509817	-0.389396	0.0413381
P09543	2',3'-cyclic-nucleotide 3'-phosphodiesterase	0.211802	0.293289	0.118919	0.601587	-0.092883	0.810229	0.174648	0.258313	0.342554	0.0108184	-0.14082	0.208108	-0.305358	0.223209	-0.167906	0.264199
Q9C0A0	Contactin-associated protein-like 4	0.31817	0.293596	-0.258053	0.547629	-0.576224	0.226898	0.0876807	0.734322	0.587465	0.00216306	-0.469977	0.187223	-0.712807	0.104737	-0.499784	0.0622488
Q5JTV8	Torsin-1A-interacting protein 1	0.249463	0.293784	-0.199942	0.394223	-0.449405	0.159487	0.0697013	0.715995	0.736692	0.000228032	-0.487527	0.0298087	-1.06495	0.0180353	-0.666991	0.00247039
Q13885	Tubulin beta-2A chain	0.18458	0.293855	-0.00960283	0.962947	-0.194183	0.732969	0.106907	0.43543	-0.0890867	0.522443	0.208919	0.695297	0.291493	0.417478	0.195993	0.236505
Q6P179	Endoplasmic reticulum aminopeptidase 2	-0.742078	0.293958	-2.50791	#DIV/0!	-1.76583	#DIV/0!	-1.09524	0.147753	-1.18091	0.28466	0.542029	0.602692	-1.4302	#DIV/0!	0.085664	0.934451
Q6ZNL6	FYVE, RhoGEF and PH domain-containing protein 5	-0.157217	0.294006	-0.310904	0.246006	-0.153686	0.392508	-0.218692	0.140792	-0.225924	0.0633241	0.0895653	0.384506	-0.0866419	0.751519	0.00723228	0.949233
Q08752	Peptidyl-prolyl cis-trans isomerase D	0.20583	0.29402	-0.222335	0.0976864	-0.428166	0.0425114	0.0345641	0.822696	0.00495123	0.964919	0.210723	0.436547	-0.295333	0.115346	0.0296129	0.824977
Q96I99	Succinate--CoA ligase [GDP-forming] subunit beta, mitochondrial	-0.158083	0.294259	-0.0926376	0.637186	0.0654451	0.878594	-0.131905	0.365959	0.0408946	0.799234	-0.24705	0.177855	-0.218357	0.143713	-0.172799	0.171347
Q8IY67	Ribonucleoprotein PTB-binding 1	0.161449	0.294675	-0.158912	0.609608	-0.320361	0.374921	0.0333048	0.83602	0.54155	0.000211931	-0.276798	0.022687	-0.7832	0.0416739	-0.508245	0.00461116
O60488	Long-chain-fatty-acid--CoA ligase 4	0.262396	0.294687	-0.0703277	0.837918	-0.332724	0.417487	0.129307	0.542398	0.963005	6.77685e-05	-0.644729	0.0167904	-1.24076	0.0105424	-0.833698	0.00148291
Q9UJ70	N-acetyl-D-glucosamine kinase	0.221257	0.294795	-0.304955	0.511749	-0.526212	0.312891	0.0107722	0.965112	0.0252084	0.913443	0.341115	0.327474	-0.314337	0.342283	-0.0144363	0.953601
P03956	Interstitial collagenase	0.951634	0.295049	1.17245	#DIV/0!	0.220818	#DIV/0!	0.995798	0.274126	2.4156	0.120657	-2.55278	0.419002	-0.154334	#DIV/0!	-1.4198	0.277683
Q9UFN0	Protein NipSnap homolog 3A	0.322379	0.295224	-0.0753028	0.691698	-0.397682	0.413945	0.163306	0.449581	0.204611	0.256835	-0.129788	0.220312	-0.120805	0.592988	-0.0413046	0.845385
P68371	Tubulin beta-4B chain	-0.14833	0.295252	-0.0735186	0.594407	0.0748116	0.981012	-0.118406	0.28274	-0.0341252	0.723217	-0.0268629	0.746563	-0.113412	0.593613	-0.0842803	0.388258
Q9UJY1	Heat shock protein beta-8	-0.330355	0.295389	-0.595444	0.365906	-0.265089	0.640145	-0.43639	0.190735	-0.831514	0.00621412	0.485456	0.0506396	0.288201	0.395766	0.395124	0.186637
Q9H246	Uncharacterized protein C1orf21	-0.339556	0.295496	-0.147301	0.418269	0.192255	0.505647	-0.224203	0.173954	-0.0721494	0.598731	-0.302184	0.0647867	-0.0529131	0.878395	-0.152054	0.272539
Q9H2J4	Phosducin-like protein 3	0.148562	0.295909	-0.0231252	0.782713	-0.171687	0.356711	0.0798872	0.427027	0.145327	0.0958223	0.0576837	0.709873	-0.15341	0.0565888	-0.0654395	0.492034
Q8WXI4	Acyl-coenzyme A thioesterase 11	0.317188	0.296067	-0.331946	0.47994	-0.649135	0.195246	-0.0722923	0.845702	0.531973	0.128042	-0.205157	0.628768	-0.919877	0.450463	-0.604265	0.0764126
Q14134	Tripartite motif-containing protein 29	0.316739	0.296126	-0.577478	0.166898	-0.894218	0.0823859	-0.0409478	0.892116	-0.0946052	0.712714	0.327642	0.42248	-0.358277	0.534052	0.0536575	0.844829
Q9NXA8	NAD-dependent protein deacylase sirtuin-5, mitochondrial	-0.204542	0.29664	0.307637	0.281435	0.51218	0.154171	0.000329571	0.99865	-0.23076	0.222689	0.00767806	0.501928	0.640799	0.0897606	0.231089	0.23595
P82675	28S ribosomal protein S5, mitochondrial	0.251832	0.296703	-0.01577	0.943858	-0.267602	0.346197	0.144791	0.457313	0.379722	0.0819985	-0.249947	0.0477445	-0.486433	0.00632981	-0.234931	0.251885
Q9Y3B4	Splicing factor 3B subunit 6	0.191599	0.296773	-0.120583	0.538504	-0.312182	0.225659	0.0667264	0.689679	0.424975	0.0114993	-0.218496	0.0456439	-0.573923	0.0698085	-0.358248	0.009025
Q8TDL5	BPI fold-containing family B member 1	-0.58357	0.297228	1.03265	0.474846	1.61622	0.210912	0.062918	0.928153	-0.867202	0.0590706	0.356321	0.981012	1.78582	0.255355	0.93012	0.14373
P33908	Mannosyl-oligosaccharide 1,2-alpha-mannosidase IA	-0.287022	0.297358	-0.133324	0.690793	0.153698	0.706919	-0.225542	0.362419	0.128904	0.564439	-0.265942	0.276168	-0.435048	0.146461	-0.354446	0.055662
Q969Q5	Ras-related protein Rab-24	0.104401	0.297607	-0.0632934	0.624343	-0.167694	0.28511	0.0373231	0.662602	0.277149	0.00522387	-0.162677	0.144021	-0.349043	0.180297	-0.239826	0.0230634
O95171	Sciellin	-0.322498	0.297709	-0.394235	0.268532	-0.0717374	0.955443	-0.351193	0.192822	-0.786767	0.0105213	0.38637	0.410016	0.641314	0.291656	0.435574	0.0861215
Q13308	Inactive tyrosine-protein kinase 7	0.256411	0.297744	0.195837	0.648641	-0.0605744	0.83827	0.232181	0.285036	0.562617	0.0166357	-0.130272	0.384458	-0.483234	0.125391	-0.330435	0.215686
O15144	Actin-related protein 2/3 complex subunit 2	0.337099	0.298757	-0.178765	0.620464	-0.515864	0.317159	0.130753	0.60074	0.711685	0.000519534	-0.400603	0.119088	-0.947091	0.0263536	-0.580932	0.0324021
P40763	Signal transducer and activator of transcription 3	0.174693	0.298927	-0.0208541	0.917337	-0.195547	0.363484	0.0964743	0.478411	0.474313	0.000121086	-0.271501	0.10387	-0.593175	0.0187049	-0.377839	0.0066737
Q9BQB6	Vitamin K epoxide reductase complex subunit 1	0.2666	0.299058	0.11909	0.733355	-0.14751	0.793658	0.207596	0.365376	0.472529	0.0445411	-0.102077	0.414628	-0.62293	0.0415688	-0.264933	0.219365
P21333	Filamin-A	0.304252	0.299356	-0.238344	0.375264	-0.542596	0.234178	0.0872137	0.696498	0.475001	0.0165881	-0.263342	0.0800375	-0.755947	0.024839	-0.387788	0.109486
O00151	PDZ and LIM domain protein 1	0.189258	0.299661	-0.372599	0.0263885	-0.561857	0.035769	-0.0354846	0.814306	0.299773	0.0142881	-0.197608	0.357137	-0.658183	0.0209008	-0.335258	0.0549955
P34897	Serine hydroxymethyltransferase, mitochondrial	0.197791	0.299889	-0.176985	0.103796	-0.374777	0.018948	0.0478806	0.738163	0.463324	0.00631128	-0.19336	0.348936	-0.85785	0.036187	-0.415444	0.0204755
Q9Y230	RuvB-like 2	0.145066	0.300476	-0.108742	0.485304	-0.253808	0.277425	0.0435429	0.689982	0.218277	0.00552655	-0.0679807	0.342879	-0.346893	0.059521	-0.174734	0.11843
O75094	Slit homolog 3 protein	-0.386384	0.300535	0.261809	0.421609	0.648194	0.15456	0.00253189	0.993021	-0.0160619	0.938614	-0.311735	0.484718	0.346221	0.776185	0.0185938	0.940115
Q15853	Upstream stimulatory factor 2	0.23533	0.300727	-0.370013	0.19507	-0.605343	0.0783316	-0.00680683	0.971806	0.121622	0.509186	0.153534	0.54604	-0.542102	0.0582189	-0.128429	0.587344
Q8WWY3	U4/U6 small nuclear ribonucleoprotein Prp31	0.180913	0.300807	-0.253246	0.227608	-0.434159	0.128771	0.00724951	0.961509	0.332616	0.00286976	-0.176595	0.161	-0.624799	0.0133347	-0.325366	0.0325796
P78527	DNA-dependent protein kinase catalytic subunit	0.256618	0.301186	-0.330703	0.334464	-0.587321	0.221346	0.0216899	0.917269	0.417939	0.00222973	-0.189874	0.247655	-0.834744	0.0391517	-0.396249	0.0777358
Q9Y2Z4	Tyrosine--tRNA ligase, mitochondrial	0.301061	0.301534	0.0157486	#DIV/0!	-0.285313	#DIV/0!	0.243999	0.298014	0.530616	0.00735407	-0.0918472	0.456899	-0.652576	#DIV/0!	-0.286618	0.237679
Q96FJ2	Dynein light chain 2, cytoplasmic	-0.325524	0.301663	0.0758973	0.831553	0.401421	0.305852	-0.164955	0.562813	-0.333322	0.235446	0.0486248	0.350773	0.463615	0.0597466	0.168367	0.459005
O75791	GRB2-related adapter protein 2	0.159017	0.301809	0.0322485	0.867445	-0.126769	0.537927	0.0829561	0.537574	0.333763	0.166428	-0.0838488	0.105618	-0.212263	0.755556	-0.250807	0.28995
O15533	Tapasin	0.290143	0.301828	-0.266355	0.44885	-0.556498	0.150717	0.067544	0.801046	1.08361	0.000378699	-0.859377	0.00462282	-1.30655	0.000175632	-1.01606	0.000240564
P48147	Prolyl endopeptidase	0.0823484	0.301937	0.035261	0.651009	-0.0470874	0.361236	0.0635135	0.40008	0.165679	0.0545703	-0.0283474	0.816469	-0.188005	0.0511923	-0.102166	0.0514119
Q8IUX7	Adipocyte enhancer-binding protein 1	-0.262022	0.302392	0.501379	0.292007	0.763401	0.116821	0.0433387	0.885728	-0.318826	0.252041	0.118653	0.791746	0.763197	0.086469	0.362165	0.140335
P54725	UV excision repair protein RAD23 homolog A	-0.186467	0.302554	0.00832784	0.96712	0.194795	0.428998	-0.108549	0.507308	-0.165981	0.350297	0.152945	0.108403	0.144046	0.455456	0.0574315	0.692816
Q7LBR1	Charged multivesicular body protein 1b	0.148633	0.302578	0.120773	0.369858	-0.0278596	0.619793	0.137489	0.2106	0.259991	0.0111335	-0.0203713	0.835362	-0.233915	0.048142	-0.122502	0.207254
Q16531	DNA damage-binding protein 1	0.101393	0.303106	-0.0215157	0.827629	-0.122908	0.182661	0.0522294	0.577224	0.165729	0.0878448	-0.114445	0.151882	-0.151205	0.0445687	-0.1135	0.0402634
Q9UI12	V-type proton ATPase subunit H	-0.159701	0.303177	-0.158586	0.670107	0.00111435	0.930357	-0.159255	0.34629	0.155464	0.16163	-0.269242	0.0318389	-0.399353	0.162249	-0.314719	0.0589864
P26885	Peptidyl-prolyl cis-trans isomerase FKBP2	-0.250425	0.303701	0.227543	0.350482	0.477968	0.189506	-0.0592381	0.775255	0.356295	0.104026	-0.339677	0.22532	-0.396032	0.191925	-0.415533	0.0650756
Q9NPF5	DNA methyltransferase 1-associated protein 1	0.159037	0.304142	0.0110895	0.958334	-0.147948	0.617348	0.0998582	0.451916	0.38098	0.00108166	-0.183705	0.188946	-0.371351	0.0603368	-0.281122	0.0244399
P43897	Elongation factor Ts, mitochondrial	0.178054	0.304733	-0.00244969	0.989823	-0.180504	0.186517	0.105852	0.462258	0.266476	0.0316715	-0.0896487	0.915554	-0.363385	0.139873	-0.160624	0.171448
Q8IUR7	Armadillo repeat-containing protein 8	0.193471	0.304746	-0.0610433	#DIV/0!	-0.254514	#DIV/0!	0.142568	0.380324	0.261013	0.0476946	0.03065	0.490367	-0.420248	#DIV/0!	-0.118445	0.426782
Q9NR45	Sialic acid synthase	-0.290052	0.30481	0.0975503	0.852296	0.387602	0.487284	-0.135011	0.663893	0.592101	0.0724754	-0.704939	0.118631	-0.744354	0.108386	-0.727112	0.0144223
P17544	Cyclic AMP-dependent transcription factor ATF-7	0.140419	0.304953	0.147278	#DIV/0!	0.00685857	#DIV/0!	0.141791	0.243044	0.0369361	0.711627	0.0695428	0.583622	0.144282	#DIV/0!	0.104855	0.233563
Q9Y2X3	Nucleolar protein 58	0.376043	0.305278	-0.433446	0.221769	-0.809489	0.100161	0.0522476	0.855892	0.452616	0.0331632	-0.253057	0.488738	-0.869186	0.0831125	-0.400368	0.172791
Q01518	Adenylyl cyclase-associated protein 1	0.227558	0.30551	-0.0835191	0.782204	-0.311077	0.456363	0.103127	0.583736	0.683862	0.000100304	-0.395451	0.0143556	-0.821823	0.0143433	-0.580735	0.00470945
P52788	Spermine synthase	-0.195839	0.306108	-0.0230969	0.899521	0.172742	0.137369	-0.0921937	0.614301	0.215633	0.285622	-0.390386	0.311325	-0.303393	0.163551	-0.307826	0.0199997
O43716	Glutamyl-tRNA(Gln) amidotransferase subunit C, mitochondrial	-0.435841	0.306112	0.0869947	0.862211	0.522836	0.361421	-0.12214	0.734218	-0.584067	0.0651833	0.339946	0.771457	0.686053	0.618741	0.461927	0.19073
Q9H0A0	RNA cytidine acetyltransferase	0.247453	0.306301	-0.189332	0.469653	-0.436785	0.160418	0.0727393	0.702594	0.460651	0.0086663	-0.409463	0.0840384	-0.507016	0.055118	-0.387912	0.0683082
Q12874	Splicing factor 3A subunit 3	0.284102	0.306514	-0.261137	0.406365	-0.545239	0.248129	0.0660064	0.75697	0.476743	0.000364018	-0.231138	0.308502	-0.777957	0.0225559	-0.410736	0.0698694
Q86U86	Protein polybromo-1	0.142913	0.306977	0.0544496	0.802126	-0.0884639	0.791043	0.107528	0.386603	0.334643	0.00356884	-0.10721	0.34277	-0.456866	0.0758939	-0.227115	0.0669364
Q15388	Mitochondrial import receptor subunit TOM20 homolog	0.217706	0.307203	0.136025	0.647197	-0.0816814	0.67555	0.185034	0.290708	0.123051	0.353608	0.18877	0.245919	-0.0650824	0.833208	0.0619829	0.707054
P16035	Metalloproteinase inhibitor 2	-0.213627	0.307298	0.117933	0.643267	0.33156	0.170472	-0.0146909	0.948159	0.0459447	0.831279	-0.181262	0.444928	-0.132183	0.23039	-0.0606355	0.701971
Q9BYD3	39S ribosomal protein L4, mitochondrial	0.247415	0.30741	0.0234064	0.939351	-0.224008	0.252574	0.157811	0.489718	0.342057	0.108591	-0.0940418	0.906596	-0.423684	0.163361	-0.184246	0.212964
P49815	Tuberin	-0.163931	0.307823	0.0233638	#DIV/0!	0.187295	#DIV/0!	-0.126472	0.362393	-0.266467	0.0211766	0.125216	0.0309602	0.26715	#DIV/0!	0.139995	0.244674
P00338	L-lactate dehydrogenase A chain	0.134428	0.307932	-0.165465	0.162671	-0.299893	0.000427129	0.0144706	0.909616	0.270818	0.0747093	-0.248813	0.284315	-0.406269	0.00604183	-0.256348	0.0385653
Q12846	Syntaxin-4	0.114043	0.308088	-0.0150824	0.900707	-0.129126	0.612621	0.0623931	0.451712	0.240313	0.000227711	-0.153804	0.0651014	-0.265318	0.0554716	-0.17792	0.0438508
O75146	Huntingtin-interacting protein 1-related protein	0.296158	0.308355	-0.2818	0.596121	-0.577959	0.4131	0.0649748	0.831018	-0.1459	0.60985	0.452017	0.320579	-0.0277811	0.96261	0.210875	0.477651
P51149	Ras-related protein Rab-7a	0.2449	0.308369	-0.215681	0.276432	-0.460581	0.215511	0.0606675	0.734594	0.391681	0.0120748	-0.0743313	0.426899	-0.778155	0.0518957	-0.331013	0.092153
P36776	Lon protease homolog, mitochondrial	0.151862	0.309056	0.044899	0.895471	-0.106963	0.63843	0.109077	0.51007	0.22528	0.0833168	-0.12679	0.562235	-0.253712	0.495437	-0.116203	0.432269
P02747	Complement C1q subcomponent subunit C	-0.310687	0.309181	-0.120376	0.654755	0.190311	0.358501	-0.234562	0.361482	-0.0997454	0.705635	0.0542053	0.935601	-0.338285	0.163974	-0.134817	0.516769
P30566	Adenylosuccinate lyase	0.210253	0.309616	0.0860679	0.768277	-0.124185	0.454991	0.160579	0.426782	0.288652	0.139404	-0.132053	0.463497	-0.261881	0.3117	-0.128073	0.354992
Q99439	Calponin-2	0.51359	0.309968	-0.325221	0.697424	-0.838811	0.459924	0.178065	0.695944	1.01708	0.00246348	-0.511614	0.0881636	-1.45067	0.0455299	-0.839018	0.0732802
Q8N139	ATP-binding cassette sub-family A member 6	-0.341617	0.310356	-0.0660259	0.884468	0.275591	0.7097	-0.23138	0.44114	-0.0832477	0.74709	-0.216184	0.775605	-0.117185	0.83893	-0.148133	0.547189
Q9BYN0	Sulfiredoxin-1	-0.281705	0.310738	0.465096	0.05351	0.746801	0.048827	0.0170156	0.940913	-0.102404	0.646084	0.0722109	0.819469	0.36934	0.399595	0.119419	0.653081
P50213	Isocitrate dehydrogenase [NAD] subunit alpha, mitochondrial	0.206695	0.310777	-0.0850994	0.825556	-0.291795	0.349187	0.0899775	0.684204	0.20377	0.346132	-0.135818	0.617206	-0.32953	0.279687	-0.113793	0.565354
Q9UHB9	Signal recognition particle subunit SRP68	0.190588	0.310893	-0.0531262	0.874193	-0.243714	0.58885	0.0931023	0.597696	0.416191	0.00685108	-0.174969	0.0595243	-0.594789	0.0435929	-0.323088	0.0852755
Q8N436	Inactive carboxypeptidase-like protein X2	-0.219668	0.310925	0.381077	0.504337	0.600746	0.302512	0.02063	0.941998	0.0569934	0.819364	-0.248486	0.499249	0.266652	0.614394	-0.0363634	0.893088
O43809	Cleavage and polyadenylation specificity factor subunit 5	0.169772	0.310966	-0.12075	0.360283	-0.290522	0.113709	0.0535633	0.70973	0.261115	0.0801296	-0.0158497	0.506889	-0.491604	0.0511781	-0.207551	0.0947037
Q9NZL4	Hsp70-binding protein 1	0.135349	0.311019	-0.02261	0.894198	-0.157959	0.293649	0.0721655	0.560443	0.0829315	0.517485	0.111639	0.125858	-0.164634	0.627507	-0.010766	0.921952
Q5VZE5	N-alpha-acetyltransferase 35, NatC auxiliary subunit	0.26518	0.311224	0.860596	#DIV/0!	0.595417	#DIV/0!	0.384263	0.141583	0.29805	0.0529022	0.0159551	0.656111	0.513721	#DIV/0!	0.0862128	0.688223
Q9H3N1	Thioredoxin-related transmembrane protein 1	0.210874	0.311322	-0.586587	#DIV/0!	-0.797461	#DIV/0!	0.0513817	0.835401	0.803275	0.00384149	-0.582705	0.19905	-1.39956	#DIV/0!	-0.751893	0.0148789
O75891	Cytosolic 10-formyltetrahydrofolate dehydrogenase	-0.317278	0.311409	-0.126503	0.798069	0.190775	0.688999	-0.202813	0.547954	-0.503491	0.217382	-0.110546	0.757714	0.754668	0.231181	0.300678	0.446081
Q92633	Lysophosphatidic acid receptor 1	-0.222233	0.311417	-0.038035	0.930522	0.184198	0.681301	-0.111714	0.665847	0.0339496	0.887919	-0.200802	0.71742	0.263868	0.507665	-0.145664	0.630802
P78347	General transcription factor II-I	0.165298	0.31143	-0.0855826	0.679988	-0.250881	0.452235	0.064946	0.624155	0.211671	0.0122622	-0.0364469	0.489606	-0.333909	0.0906267	-0.146725	0.22587
Q15233	Non-POU domain-containing octamer-binding protein	0.303658	0.311554	-0.313241	0.301802	-0.616899	0.217546	0.0568988	0.807458	0.534325	0.00219506	-0.212233	0.156219	-1.00647	0.00554104	-0.477426	0.0511851
O60832	H/ACA ribonucleoprotein complex subunit DKC1	0.201907	0.311946	-0.247555	0.257705	-0.449462	0.0899693	0.0221221	0.899367	0.176689	0.339103	0.0127973	0.74543	-0.527434	0.0675256	-0.154567	0.424486
Q12931	Heat shock protein 75 kDa, mitochondrial	0.159335	0.3121	0.0228976	0.89827	-0.136437	0.263147	0.10476	0.43645	0.283076	0.0233834	-0.0938785	0.831507	-0.363245	0.0737794	-0.178317	0.0984088
Q9Y265	RuvB-like 1	0.163658	0.312358	-0.13663	0.518751	-0.300288	0.310402	0.0435426	0.738821	0.3114	0.000303831	-0.160144	0.200228	-0.451455	0.0764578	-0.267857	0.0524448
P35241	Radixin	0.114354	0.312399	0.112205	0.417207	-0.00214881	0.847951	0.113495	0.22522	0.202581	0.0562884	-0.0604716	0.0709541	-0.237434	0.055122	-0.0890867	0.383486
Q9BRZ2	E3 ubiquitin-protein ligase TRIM56	-0.299826	0.312445	0.299056	0.73575	0.598882	0.529468	-0.0602733	0.878244	-0.15191	0.527051	-0.119905	0.706203	0.333183	0.706029	0.0916364	0.792387
P62424	60S ribosomal protein L7a	0.238485	0.312784	-0.127212	0.584936	-0.365698	0.226877	0.0922062	0.644661	0.475518	0.0155841	-0.224529	0.119539	-0.75148	0.0133696	-0.383312	0.0343641
Q9UN36	Protein NDRG2	-0.531856	0.312831	0.203171	0.743933	0.735027	0.450215	-0.237845	0.595166	-0.680088	0.0899784	-0.0480459	0.711981	1.05064	0.0462188	0.442243	0.278741
P82979	SAP domain-containing ribonucleoprotein	0.179644	0.313094	-0.135277	0.364395	-0.31492	0.136216	0.0536755	0.727678	0.356588	0.0160737	-0.16417	0.186217	-0.549474	0.00264677	-0.302912	0.011262
Q16695	Histone H3.1t	0.290397	0.313418	-0.687762	0.001741	-0.97816	0.0169659	-0.100866	0.706584	0.963837	0.00323851	-0.610878	0.0181373	-2.00203	0.00313201	-1.0647	0.00267849
O15212	Prefoldin subunit 6	0.159592	0.313461	-0.026184	0.860947	-0.185776	0.455463	0.0852816	0.524016	0.178011	0.17442	0.0241487	0.620574	-0.171714	0.529513	-0.0927291	0.396765
Q9UIF9	Bromodomain adjacent to zinc finger domain protein 2A	-0.118545	0.313592	-0.157996	0.669486	-0.0394513	0.911851	-0.142216	0.493856	-0.0252273	0.874423	-0.0525661	0.0364246	-0.0322118	0.993264	-0.116988	0.598138
Q9P2E9	Ribosome-binding protein 1	0.279953	0.313598	0.123663	0.805599	-0.15629	0.822243	0.217437	0.408287	0.804063	0.00791277	-0.472899	0.282655	-0.876464	0.0210761	-0.586627	0.0656306
Q86W92	Liprin-beta-1	0.511507	0.313769	-1.00707	0.0026639	-1.51857	0.00193849	-0.0959233	0.818945	0.614051	0.0526808	-0.0428831	0.629929	-1.78887	0.0154665	-0.709974	0.105779
P39210	Protein Mpv17	0.251966	0.313915	0.0969398	0.704689	-0.155026	0.211432	0.189955	0.377734	0.257773	0.251674	0.124735	0.134193	-0.543881	0.0971627	-0.0678179	0.708735
Q9NVF7	F-box only protein 28	-0.200662	0.31398	0.023685	0.921417	0.224347	0.19134	-0.110923	0.50995	-0.0149691	0.919137	-0.162697	0.228061	0.11352	0.607296	-0.0959541	0.52977
Q9NSK0	Kinesin light chain 4	-0.131873	0.314045	-0.0871603	0.78184	0.0447124	0.888512	-0.113988	0.451697	-0.0398137	0.753612	-0.0295524	0.839612	-0.0655197	0.78738	-0.074174	0.591815
Q96AG4	Leucine-rich repeat-containing protein 59	0.246351	0.31415	-0.0502825	0.884064	-0.296633	0.435036	0.127697	0.529427	0.8151	0.00234196	-0.547231	0.15886	-1.0348	0.0120104	-0.687403	0.0156671
Q8IYB7	DIS3-like exonuclease 2	0.242651	0.314436	-0.134911	0.732092	-0.377562	0.275297	0.0916261	0.686348	0.404808	0.0177731	-0.0665531	0.82633	-0.685983	0.0775276	-0.313182	0.117293
P30519	Heme oxygenase 2	0.146154	0.315052	-0.295449	0.0522616	-0.441603	0.0304956	-0.0304872	0.826998	0.164164	0.232335	-0.0624771	0.193024	-0.431604	0.0653673	-0.194651	0.169819
P24928	DNA-directed RNA polymerase II subunit RPB1	0.199778	0.315364	-0.14002	0.513621	-0.339798	0.246988	0.0638586	0.698798	0.468246	0.00139032	-0.26914	0.0946723	-0.679345	0.0043848	-0.404387	0.0110384
Q15828	Cystatin-M	0.290322	0.315886	0.624524	0.283552	0.334202	0.328278	0.424003	0.128889	-0.290924	0.213776	0.76394	0.0788977	1.0178	0.0929917	0.714927	0.0251347
Q9BS26	Endoplasmic reticulum resident protein 44	-0.168909	0.315954	0.02329	0.929703	0.192199	0.693671	-0.0920292	0.582977	0.438458	0.0146502	-0.521653	0.0551601	-0.551403	0.1194	-0.530488	0.00170011
Q96FZ7	Charged multivesicular body protein 6	-0.0772204	0.315972	0.201343	0.0161427	0.278563	0.00216317	0.034205	0.68385	-0.0275623	0.750559	-0.0130135	0.927603	0.207348	0.173208	0.0617673	0.431602
Q96TC7	Regulator of microtubule dynamics protein 3	0.205608	0.316086	-0.0846825	0.778395	-0.290291	0.409862	0.0894921	0.617479	0.55116	0.000751283	-0.264692	0.0504753	-0.807708	0.029599	-0.461668	0.0158151
P25325	3-mercaptopyruvate sulfurtransferase	0.0918725	0.316322	0.0322182	0.693296	-0.0596543	0.500522	0.0680108	0.420897	-0.105296	0.341259	0.316875	0.0093243	-0.0117113	0.921875	0.173307	0.0545907
O43169	Cytochrome b5 type B	-0.197411	0.31633	-0.00917435	0.97525	0.188237	0.503384	-0.122116	0.5397	-0.21278	0.259676	0.035304	0.756148	0.195433	0.52777	0.0906639	0.503237
O15145	Actin-related protein 2/3 complex subunit 3	0.238225	0.316469	-0.14787	0.623577	-0.386095	0.289165	0.0837874	0.678671	0.530225	0.00248203	-0.265347	0.25918	-0.718274	0.0280982	-0.446438	0.0256617
Q12884	Prolyl endopeptidase FAP	0.301158	0.316803	0.194793	0.186307	-0.106365	0.903982	0.258612	0.17278	0.824269	0.0094579	-0.47998	0.3473	-0.963554	0.0468779	-0.565657	0.0731563
P51114	Fragile X mental retardation syndrome-related protein 1	0.273117	0.317058	0.160719	0.735022	-0.112398	0.655793	0.228158	0.408471	0.266641	0.275234	-0.011612	0.662399	-0.224444	0.668027	-0.0384827	0.856604
P49411	Elongation factor Tu, mitochondrial	0.19546	0.317108	-0.108264	0.578478	-0.303724	0.0975323	0.07397	0.655147	0.25237	0.128696	-0.113957	0.826131	-0.502133	0.0313477	-0.1784	0.251169
P23469	Receptor-type tyrosine-protein phosphatase epsilon	0.217862	0.317124	-0.123439	0.717039	-0.341301	0.335844	0.0813413	0.706609	0.411719	0.0378763	-0.102487	0.0711925	-0.579584	0.0524119	-0.330377	0.0651079
Q16890	Tumor protein D53	-0.241318	0.317363	-0.199877	0.622572	0.0414409	0.907487	-0.216453	0.443865	-0.239732	0.472552	-0.244528	0.588823	0.363185	0.539785	0.0232787	0.939777
P47914	60S ribosomal protein L29	0.216936	0.317374	-0.0355385	0.890047	-0.252474	0.434709	0.115946	0.530844	0.461461	0.00882885	-0.2068	0.174083	-0.643591	0.0385285	-0.345515	0.0416721
Q9BW92	Threonine--tRNA ligase, mitochondrial	0.169124	0.31747	-0.272148	0.398262	-0.441272	0.170606	-0.00738475	0.96874	0.151254	0.468554	0.00508601	0.794886	-0.71946	0.0119902	-0.158638	0.451029
P63167	Dynein light chain 1, cytoplasmic	0.38345	0.3178	-0.53716	0.177589	-0.920609	0.113977	0.0152058	0.963024	0.0186365	0.935327	0.261553	0.951382	-0.393153	0.424276	-0.00343071	0.990257
Q93084	Sarcoplasmic/endoplasmic reticulum calcium ATPase 3	-0.496871	0.317845	0.284921	0.69434	0.781792	0.288868	-0.0277956	0.96001	0.352645	0.476253	-0.786159	0.337754	-0.333712	0.52016	-0.380441	0.412034
Q9BUJ2	Heterogeneous nuclear ribonucleoprotein U-like protein 1	0.260527	0.318166	-0.229687	0.31738	-0.490213	0.241685	0.0644413	0.740362	0.405105	0.00490352	-0.136591	0.326467	-0.776446	0.00906418	-0.340664	0.0898041
O14939	Phospholipase D2	0.181823	0.318526	0.38592	0.0277739	0.204096	0.28035	0.304281	0.0410675	0.287364	0.0414684	-0.063008	0.517695	0.0618454	0.976055	0.0169165	0.87194
Q9HD42	Charged multivesicular body protein 1a	0.137931	0.31864	-0.0928075	0.520518	-0.230738	0.255866	0.0456355	0.690787	0.318035	0.0120766	-0.24813	0.0643018	-0.322755	0.171205	-0.2724	0.0348998
Q6ZUJ8	Phosphoinositide 3-kinase adapter protein 1	-0.329151	0.3189	0.0472578	0.887767	0.376409	0.213106	-0.103306	0.7398	0.338694	0.331526	-0.749487	0.389816	-0.312832	0.0033507	-0.442	0.109268
O75534	Cold shock domain-containing protein E1	0.149586	0.318953	-0.18094	0.208709	-0.330526	0.115049	0.0173758	0.881848	0.329158	0.000393361	-0.157929	0.345434	-0.574747	0.0043667	-0.311782	0.0154678
Q02880	DNA topoisomerase 2-beta	0.254274	0.319201	-0.240363	0.524281	-0.494637	0.296804	0.0564193	0.795761	0.420593	0.00943912	-0.209335	0.207456	-0.770455	0.0407725	-0.364174	0.1199
P08246	Neutrophil elastase	0.329676	0.319223	0.580355	0.488057	0.25068	0.813447	0.429948	0.255785	1.23053	0.0589119	-0.17931	0.905032	-1.6311	0.209985	-0.800582	0.221895
Q9UBU9	Nuclear RNA export factor 1	0.210073	0.319697	-0.0590155	0.779281	-0.269089	0.40763	0.102438	0.529489	0.500814	0.000337251	-0.248288	0.0833185	-0.654122	0.0215338	-0.398377	0.0129428
P49023	Paxillin	0.246049	0.319927	-0.597975	#DIV/0!	-0.844024	#DIV/0!	0.077244	0.772015	0.457231	0.0503881	-0.322378	0.593163	-0.94401	#DIV/0!	-0.379987	0.201157
P20851	C4b-binding protein beta chain	-0.740452	0.319944	-0.0765486	0.855592	0.663904	0.354621	-0.34211	0.35006	-0.261571	0.467822	0.068714	0.761152	-0.373392	0.425052	-0.0805393	0.847174
Q9H7D7	WD repeat-containing protein 26	0.099639	0.320583	-0.301585	0.0432651	-0.401224	0.0319662	-0.0608504	0.586429	0.155479	0.125817	-0.042866	0.37877	-0.440594	0.00622309	-0.216329	0.0582851
O75340	Programmed cell death protein 6	0.189608	0.320799	-0.00236291	0.989553	-0.191971	0.407474	0.112819	0.509133	0.160861	0.37195	0.170528	0.548703	-0.238689	0.186827	-0.048042	0.709448
Q14247	Src substrate cortactin	0.264802	0.321057	-0.186796	0.625021	-0.451598	0.330761	0.0841628	0.711486	0.476285	0.0375845	-0.342639	0.362141	-0.657427	0.0836029	-0.392123	0.148152
Q9H4A5	Golgi phosphoprotein 3-like	-0.215437	0.321316	0.16556	0.764031	0.380997	0.488451	-0.0630386	0.820855	0.228112	0.391273	-0.332118	0.386571	-0.226629	0.699384	-0.29115	0.259235
P22830	Ferrochelatase, mitochondrial	0.186568	0.321337	-0.187408	0.451765	-0.373976	0.219829	0.0369778	0.818811	0.156574	0.307834	0.0434799	0.779998	-0.539467	0.0892707	-0.119596	0.509602
P07858	Cathepsin B	-0.201101	0.322447	0.0546485	0.804407	0.255749	0.327868	-0.0988009	0.596963	0.271586	0.198046	-0.21165	0.394486	-0.354161	0.252635	-0.370387	0.0380907
Q9Y6K5	2'-5'-oligoadenylate synthase 3	0.27725	0.322472	-0.109252	#DIV/0!	-0.386502	#DIV/0!	0.19995	0.422815	0.525682	0.088579	-0.579875	0.0714889	-0.30349	#DIV/0!	-0.325732	0.27288
Q15717	ELAV-like protein 1	0.121122	0.323013	-0.122622	0.268564	-0.243744	0.0726776	0.0236244	0.833523	0.227802	0.040681	-0.069359	0.34141	-0.438118	0.00674484	-0.204177	0.0165708
P49441	Inositol polyphosphate 1-phosphatase	0.231614	0.323189	0.14225	0.608655	-0.0893639	0.695314	0.195868	0.382508	0.43713	0.0878036	-0.0245389	0.931054	-0.42935	0.350835	-0.241261	0.182005
O43707	Alpha-actinin-4	0.182895	0.323376	-0.178309	0.534089	-0.361205	0.375688	0.0384134	0.815122	0.27165	0.0243417	-0.129489	0.17173	-0.396897	0.143931	-0.233236	0.165547
Q5VTR2	E3 ubiquitin-protein ligase BRE1A	0.15861	0.323417	-0.0503837	0.683221	-0.208993	0.121926	0.0750123	0.574972	0.148615	0.207386	0.00954543	0.674774	-0.210155	0.0714113	-0.0736022	0.382902
P49902	Cytosolic purine 5'-nucleotidase	0.144391	0.323773	-0.00388623	0.984797	-0.148277	0.362423	0.0850801	0.512126	0.309807	0.0127979	-0.0785938	0.883928	-0.438044	0.196748	-0.224727	0.0707064
O43252	Bifunctional 3'-phosphoadenosine 5'-phosphosulfate synthase 1	0.305149	0.323963	-0.225671	0.597826	-0.530819	0.486907	0.0928209	0.706675	0.530633	0.000443023	-0.285312	0.0685578	-0.778085	0.069325	-0.437812	0.0997348
Q99729	Heterogeneous nuclear ribonucleoprotein A/B	0.198122	0.323994	-0.279134	0.365209	-0.477256	0.239356	0.00721974	0.9694	0.507444	0.00119536	-0.387384	0.0420749	-0.785646	0.0285944	-0.500224	0.0113748
Q02978	Mitochondrial 2-oxoglutarate/malate carrier protein	0.381178	0.323998	0.078908	0.918605	-0.30227	0.613407	0.26027	0.509824	0.0342934	0.915288	0.132208	0.474581	-0.0830967	0.897488	0.225976	0.542371
Q9BTC0	Death-inducer obliterator 1	0.154981	0.324099	0.193966	#DIV/0!	0.0389846	#DIV/0!	0.162778	0.220874	0.210893	0.22648	-0.224529	0.449379	0.151689	#DIV/0!	-0.0481156	0.773435
P11387	DNA topoisomerase 1	0.155354	0.324154	-0.17144	0.109977	-0.326794	0.133981	0.0246362	0.82765	0.422451	0.00167714	-0.235089	0.0117715	-0.728408	0.0103649	-0.397815	0.0100232
Q9BWS9	Chitinase domain-containing protein 1	-0.176998	0.324292	0.108069	0.760249	0.285067	0.434617	-0.0629711	0.742634	0.271985	0.172514	-0.295644	0.260198	-0.362235	0.0811958	-0.334956	0.108297
Q9Y2S6	Translation machinery-associated protein 7	0.182716	0.324516	0.0397796	0.838373	-0.142937	0.240312	0.125542	0.467396	0.241404	0.172622	0.0020843	0.714291	-0.226071	0.372682	-0.115863	0.285367
P35221	Catenin alpha-1	0.20597	0.324717	-0.234717	0.456487	-0.440687	0.269862	0.0296955	0.880341	0.18713	0.263879	-0.0331097	0.645161	-0.442894	0.147828	-0.157434	0.401196
P09471	Guanine nucleotide-binding protein G(o) subunit alpha	0.158707	0.324725	-0.138679	#DIV/0!	-0.297386	#DIV/0!	0.0992296	0.515858	-0.0195816	0.868562	0.146715	0.209002	-0.0875237	#DIV/0!	0.118811	0.335487
P42765	3-ketoacyl-CoA thiolase, mitochondrial	0.232205	0.324833	0.0560448	0.914136	-0.176161	0.68561	0.161741	0.548475	-0.00697264	0.976688	0.175383	0.371396	-0.0173274	0.973029	0.168714	0.463574
Q7Z794	Keratin, type II cytoskeletal 1b	0.381072	0.324908	0.702162	0.000443592	0.321091	0.0881095	0.509508	0.0447572	0.00574448	0.979548	0.45198	0.650245	0.972672	0.0196122	0.503763	0.0927006
P20962	Parathymosin	-0.351183	0.325014	0.16897	0.713721	0.520153	0.464171	-0.143122	0.649944	-0.373607	0.202858	0.185764	0.247228	0.600926	0.295173	0.230485	0.435071
Q9BV81	ER membrane protein complex subunit 6	-0.131068	0.325045	0.0283248	#DIV/0!	0.159392	#DIV/0!	-0.0991892	0.453686	-0.0203369	0.895705	-0.0309513	0.927157	-0.0311178	#DIV/0!	-0.0788523	0.490325
P52701	DNA mismatch repair protein Msh6	0.163312	0.32529	-0.0996694	0.363569	-0.262981	0.300087	0.0581192	0.617753	0.258623	0.0236752	-0.0064109	0.576526	-0.487355	0.044638	-0.200504	0.139233
P60981	Destrin	0.267829	0.325581	-0.241985	0.419897	-0.509814	0.313922	0.0639037	0.765953	0.08436	0.55595	0.0873396	0.705808	-0.221613	0.449508	-0.0204563	0.921048
Q14671	Pumilio homolog 1	-0.129022	0.325807	-0.057652	0.689007	0.0713702	0.594773	-0.0862001	0.466951	0.0814284	0.453816	-0.176782	0.0782754	-0.135621	0.425282	-0.167628	0.0510872
P48426	Phosphatidylinositol 5-phosphate 4-kinase type-2 alpha	0.180971	0.32594	0.150471	0.68825	-0.0304996	0.964828	0.168771	0.378777	0.303775	0.0828239	0.042053	0.965304	-0.264424	0.248043	-0.135004	0.456046
Q9NSB2	Keratin, type II cuticular Hb4	-0.457753	0.326023	2.61729	#DIV/0!	3.07504	#DIV/0!	0.157255	0.83907	-0.690715	0.138768	0.234903	0.757147	3.30606	#DIV/0!	0.84797	0.249932
P43686	26S proteasome regulatory subunit 6B	0.108803	0.326321	0.0276013	0.825644	-0.0812013	0.517036	0.076322	0.447213	0.230739	0.0269126	-0.0484569	0.535047	-0.249018	0.0692168	-0.154416	0.0425528
P31689	DnaJ homolog subfamily A member 1	-0.228571	0.326594	-0.253885	0.371111	-0.0253134	0.58761	-0.238697	0.189099	0.277696	0.0331048	-0.505592	0.0256376	-0.582026	0.0924902	-0.516393	0.00507601
P36955	Pigment epithelium-derived factor	-0.446944	0.326625	0.639201	0.281531	1.08614	0.0494405	-0.012486	0.97593	-0.38012	0.258428	0.127779	0.697817	0.944192	0.0642105	0.367634	0.344903
Q9Y3Q8	TSC22 domain family protein 4	-0.143676	0.32668	0.0958353	0.623833	0.239511	0.345615	-0.0478713	0.725601	0.119843	0.36511	-0.15149	0.53705	-0.0643868	0.708012	-0.167714	0.184703
Q9UK76	Jupiter microtubule associated homolog 1	-0.755112	0.326826	0.626019	0.557683	1.38113	0.344109	-0.20266	0.769023	0.0667394	0.916081	-0.567454	0.601593	0.634853	0.296336	-0.269399	0.700234
P62854	40S ribosomal protein S26	0.199349	0.32751	-0.174533	0.348898	-0.373881	0.0966838	0.049796	0.785396	0.320454	0.0876033	-0.00804558	0.940981	-0.594954	0.147015	-0.270658	0.076607
Q9HCG8	Pre-mRNA-splicing factor CWC22 homolog	0.297772	0.32824	0.0289067	#DIV/0!	-0.268866	#DIV/0!	0.243999	0.362327	0.674792	0.0119654	-0.518463	0.0169758	-0.504441	#DIV/0!	-0.430793	0.0747989
P07910	Heterogeneous nuclear ribonucleoproteins C1/C2	0.263849	0.32826	-0.271564	0.221642	-0.535413	0.194801	0.0496839	0.807065	0.509912	0.00239392	-0.189708	0.138226	-0.961737	0.00132096	-0.460228	0.0344041
P13010	X-ray repair cross-complementing protein 5	0.227152	0.328745	-0.263662	0.372517	-0.490814	0.260665	0.0308261	0.871112	0.399928	0.00136213	-0.192152	0.14281	-0.730726	0.040206	-0.369102	0.0626471
Q53LP3	Ankyrin repeat domain-containing protein SOWAHC	0.166202	0.329039	-0.370982	#DIV/0!	-0.537183	#DIV/0!	0.058765	0.743347	0.0157636	0.895099	0.222538	0.290097	-0.458845	#DIV/0!	0.0430014	0.79891
O43143	ATP-dependent RNA helicase DHX15	0.230952	0.32939	-0.22858	0.473041	-0.459531	0.256307	0.0471391	0.82163	0.538882	0.00158465	-0.288383	0.180517	-0.877233	0.035542	-0.491742	0.0158413
P13535	Myosin-8	0.503591	0.329649	0.833581	0.140119	0.32999	0.848147	0.635587	0.133698	0.1061	0.807522	0.00750293	0.703688	1.09417	0.156723	0.529487	0.215259
Q9NQE9	Adenosine 5'-monophosphoramidase HINT3	-0.152806	0.329715	-0.0812513	0.659012	0.0715547	0.997237	-0.124184	0.330195	-0.175489	0.0818397	0.0287202	0.406154	0.105995	0.516874	0.0513052	0.612198
Q9NVP2	Histone chaperone ASF1B	0.154526	0.329857	-0.0760011	0.691389	-0.230528	0.315626	0.0623154	0.680674	0.292059	0.0623089	-0.0962395	0.215491	-0.377389	0.288975	-0.229744	0.0546
Q9H0P0	Cytosolic 5'-nucleotidase 3A	0.220357	0.330026	-0.316296	0.388844	-0.536653	0.137693	0.00569559	0.981149	0.0682716	0.765646	0.0714301	0.54909	-0.388543	0.136827	-0.062576	0.762471
O00168	Phospholemman	-1.30636	0.330147	0.531176	0.571977	1.83754	0.46594	-0.571346	0.528701	-1.18847	0.0632529	-0.54023	0.292516	2.42643	0.073967	0.617121	0.512155
Q8IUE6	Histone H2A type 2-B	0.240149	0.330202	-0.28568	0.47911	-0.525829	0.158126	0.0298176	0.913483	0.44526	0.0954058	-0.174061	0.5546	-0.782007	0.0416095	-0.415443	0.0333288
Q53ET0	CREB-regulated transcription coactivator 2	-0.189951	0.330242	0.0687806	0.659243	0.258732	0.244074	-0.0347121	0.789935	-0.113576	0.358244	0.0700438	0.141139	0.0741286	0.242123	0.0788638	0.570646
Q9UQR1	Zinc finger protein 148	0.101356	0.330643	-0.0127183	0.930829	-0.114074	0.415679	0.0557262	0.583028	0.0460684	0.641987	0.105563	0.446708	-0.0673252	0.561003	0.00965778	0.902945
P23434	Glycine cleavage system H protein, mitochondrial	-0.61364	0.330784	0.355672	0.604525	0.969312	0.319186	-0.225916	0.676619	-0.471038	0.330689	0.0447596	0.283577	0.739921	0.0848446	0.245123	0.5953
O00161	Synaptosomal-associated protein 23	0.13833	0.331159	-0.12525	0.500183	-0.26358	0.264836	0.0328983	0.796463	0.2998	0.0129392	-0.115854	0.221952	-0.52321	0.0515912	-0.266902	0.0352111
P14735	Insulin-degrading enzyme	0.311597	0.331456	-0.205443	0.415651	-0.51704	0.241551	0.104781	0.672747	-0.325948	0.0994545	0.666612	0.0404061	0.21082	0.446638	0.430729	0.0547813
Q99829	Copine-1	0.384881	0.331528	0.106554	0.82895	-0.278326	0.761001	0.27355	0.378769	0.68432	0.0131468	-0.217773	0.131791	-0.787609	0.0551867	-0.41077	0.207533
Q07817	Bcl-2-like protein 1	0.137529	0.331539	0.0591545	0.774207	-0.0783743	0.534465	0.106179	0.446224	0.161331	0.288839	0.14729	0.158161	-0.20202	0.479038	-0.0551522	0.652257
Q9P258	Protein RCC2	0.187627	0.331549	-0.21813	0.239162	-0.405756	0.198524	0.0253241	0.859534	0.411757	0.00134615	-0.21266	0.135996	-0.762798	0.00128044	-0.386433	0.026579
Q13438	Protein OS-9	0.19138	0.331844	-0.026695	0.940888	-0.218075	0.591198	0.10415	0.575222	0.573953	0.00019564	-0.301493	0.151758	-0.680872	0.0624062	-0.469803	0.0165168
P38646	Stress-70 protein, mitochondrial	0.140713	0.332037	-0.0290506	0.913551	-0.169763	0.447212	0.0728075	0.630049	0.338058	0.0332989	-0.287919	0.0258375	-0.466316	0.0719146	-0.26525	0.0802767
Q9P0M9	39S ribosomal protein L27, mitochondrial	0.22521	0.332599	0.212582	0.567255	-0.0126278	0.86366	0.220159	0.348176	0.313798	0.150213	-0.0748517	0.75582	-0.214457	0.565326	-0.0936395	0.552548
Q9NY33	Dipeptidyl peptidase 3	-0.1457	0.332905	0.00297106	0.983995	0.148671	0.497344	-0.0862314	0.52124	0.239581	0.138956	-0.183581	0.419143	-0.418059	0.105988	-0.325812	0.0201111
P68032	Actin, alpha cardiac muscle 1	-0.195569	0.333755	-0.0395352	0.89477	0.156034	0.897219	-0.133156	0.471614	-0.162378	0.377187	-0.166427	0.569713	0.261994	0.438208	0.0292225	0.87133
Q9BQ89	Protein FAM110A	0.212834	0.333833	-0.353033	#DIV/0!	-0.565867	#DIV/0!	0.0996607	0.630265	0.35034	0.0495244	-0.186828	0.986909	-0.654051	#DIV/0!	-0.250679	0.28044
Q6YP21	Kynurenine--oxoglutarate transaminase 3	-0.217117	0.334189	-0.169897	0.350806	0.0472199	0.841394	-0.198229	0.260706	0.152411	0.414945	-0.219591	0.0381155	-0.565847	0.148795	-0.35064	0.0450118
Q9Y3X0	Coiled-coil domain-containing protein 9	0.159589	0.334319	0.104017	0.751083	-0.0555717	0.951867	0.13736	0.40979	0.184454	0.127578	0.0316437	0.703317	-0.107505	0.759708	-0.0470941	0.735476
Q9H8L6	Multimerin-2	-0.182746	0.334565	-0.256819	0.443822	-0.0740728	0.583479	-0.212376	0.262852	-0.366641	0.052494	0.240191	0.104627	0.0609053	0.819491	0.154265	0.366942
P08575	Receptor-type tyrosine-protein phosphatase C	0.260967	0.334941	-0.151355	0.709773	-0.412322	0.411467	0.0960386	0.706056	0.646566	0.0119866	-0.349842	0.0589453	-0.825999	0.00226307	-0.550527	0.0328516
Q14669	E3 ubiquitin-protein ligase TRIP12	0.10652	0.334986	-0.121302	0.16615	-0.227822	0.0948285	0.0153915	0.867431	0.0995773	0.317548	0.0607856	0.217066	-0.299305	0.132942	-0.0841858	0.391382
Q9Y2D5	A-kinase anchor protein 2	-0.122881	0.335191	-0.0514455	0.723862	0.0714358	0.699215	-0.094307	0.425008	-0.0430142	0.703063	-0.056594	0.749099	0.0269639	0.830336	-0.0512928	0.489861
P24539	ATP synthase F(0) complex subunit B1, mitochondrial	0.211012	0.33536	-0.0454387	0.911504	-0.256451	0.414711	0.108432	0.639227	0.250201	0.305541	-0.257073	0.35576	-0.316726	0.512915	-0.14177	0.540364
P68400	Casein kinase II subunit alpha	0.139279	0.335778	-0.107329	0.438911	-0.246608	0.275513	0.040636	0.717526	0.241578	0.00576141	-0.0673521	0.360765	-0.365932	0.129907	-0.200942	0.0641318
Q13439	Golgin subfamily A member 4	-0.215001	0.335807	0.0446675	0.896438	0.259669	0.45466	-0.111134	0.571658	0.350555	0.0221019	-0.589894	0.0327537	-0.273197	0.532654	-0.461688	0.0219861
Q8IW75	Serpin A12	0.442431	0.335849	0.545508	0.354658	0.103077	0.597459	0.483662	0.170411	-0.491318	0.0448762	0.994579	0.185428	1.20508	0.0784389	0.974979	0.0100482
Q9UNW1	Multiple inositol polyphosphate phosphatase 1	0.117353	0.335882	0.286542	0.106501	0.169189	0.267104	0.218867	0.109403	0.149462	0.19816	-0.0062829	0.953419	0.114375	0.271986	0.0694051	0.434762
A8MSI8	LYR motif-containing protein 9	-0.26801	0.336222	-0.24827	0.625319	0.0197399	0.832536	-0.260114	0.328443	-0.397631	0.11495	0.032064	0.119152	0.0161261	0.966821	0.137517	0.614968
O00160	Unconventional myosin-If	0.217467	0.336312	0.0810441	0.747263	-0.136423	0.461536	0.162898	0.389478	0.768838	0.000291507	-0.551196	0.0155424	-0.751338	0.00561937	-0.60594	0.00145877
O43617	Trafficking protein particle complex subunit 3	-0.14264	0.336791	-0.137383	0.359784	0.00525676	0.975869	-0.140537	0.280975	0.0574795	0.674351	-0.0740171	0.635095	-0.237009	0.33502	-0.198016	0.0692743
Q9Y342	Plasmolipin	0.495102	0.337077	0.316975	0.64973	-0.178127	0.78013	0.388226	0.452367	-0.0546441	0.909922	0.488148	0.77547	0.555625	0.223191	0.44287	0.294037
P50281	Matrix metalloproteinase-14	-0.154688	0.337098	-0.00323247	0.986696	0.151456	0.601457	-0.094106	0.527324	-0.0352035	0.806988	-0.0337077	0.865552	0.0211616	0.915259	-0.0589024	0.595587
O00461	Golgi integral membrane protein 4	0.166547	0.337302	0.046939	0.853896	-0.119608	0.808553	0.118704	0.401604	0.286132	0.0611114	-0.109389	0.580561	-0.374847	0.0782374	-0.167428	0.347103
Q05193	Dynamin-1	-0.288637	0.337495	-0.10383	0.851976	0.184807	0.67363	-0.214714	0.453009	-0.217952	0.226066	0.00249676	0.83851	0.029114	0.95625	0.00323814	0.989266
O95071	E3 ubiquitin-protein ligase UBR5	0.177744	0.337668	-0.26271	0.316454	-0.440454	0.195537	0.00156268	0.992585	0.35032	0.00751374	-0.161503	0.178444	-0.628655	0.0418719	-0.348757	0.0388097
Q15286	Ras-related protein Rab-35	0.276109	0.338122	-0.149557	0.632013	-0.425666	0.373614	0.105842	0.643814	0.514194	0.0133016	-0.22783	0.205552	-0.760297	0.0433178	-0.408351	0.0856623
Q86TI2	Dipeptidyl peptidase 9	0.122999	0.338141	0.220952	0.288378	0.0979531	0.624505	0.16218	0.221259	0.228156	0.07139	-0.0949025	0.300888	0.00195502	0.985352	-0.0659758	0.446478
O60240	Perilipin-1	-0.577485	0.338423	0.118236	0.874039	0.695721	0.627436	-0.299197	0.544596	-1.1676	0.00908179	1.01702	0.0651488	1.23059	0.116578	0.868399	0.0831068
P00918	Carbonic anhydrase 2	-0.384433	0.338716	0.527201	0.141996	0.911634	0.120351	-0.0197797	0.952212	0.352654	0.357257	-0.29254	0.806882	-0.266964	0.391851	-0.372433	0.368385
O94905	Erlin-2	-0.173242	0.338744	0.121096	0.551323	0.294338	0.267771	-0.0555064	0.714608	-0.200606	0.18787	-0.00299096	0.956529	0.296743	0.00464045	0.1451	0.362869
Q96NY8	Nectin-4	-0.118087	0.338786	-0.227453	0.337794	-0.109366	0.794666	-0.161833	0.189413	-0.319431	0.0804945	0.255607	0.343747	0.224047	0.58235	0.157598	0.381366
Q9BTE1	Dynactin subunit 5	0.142596	0.338886	-0.0169094	#DIV/0!	-0.159506	#DIV/0!	0.110695	0.425418	0.0317356	0.80888	0.206933	0.127334	-0.144717	#DIV/0!	0.0789595	0.457896
Q96GZ6	Solute carrier family 41 member 3	-0.1801	0.339013	-0.0966222	0.70131	0.0834774	0.657559	-0.146709	0.398289	-0.279368	0.114273	0.10179	0.584788	0.216998	0.29591	0.13266	0.364179
Q5RI15	Cytochrome c oxidase assembly protein COX20, mitochondrial	0.284939	0.339019	0.400075	#DIV/0!	0.115136	#DIV/0!	0.307966	0.229581	0.361111	0.132283	-0.113012	0.771625	0.0758034	#DIV/0!	-0.053145	0.816054
P52565	Rho GDP-dissociation inhibitor 1	-0.20785	0.33906	0.0463016	0.84729	0.254152	0.187791	-0.0553591	0.802619	0.213711	0.388297	-0.261535	0.267091	-0.0883107	0.845924	-0.26907	0.146788
Q96MM6	Heat shock 70 kDa protein 12B	-0.211252	0.339167	0.164026	0.470492	0.375279	0.219054	-0.0611408	0.752921	-0.412209	0.040043	0.213611	0.434861	0.618607	0.146487	0.351068	0.0527304
Q0ZGT2	Nexilin	0.430226	0.339317	-0.00329937	0.991546	-0.433525	0.288094	0.256816	0.41024	0.0992031	0.771829	-0.0717107	0.909304	0.163192	0.805697	0.157612	0.682176
Q92499	ATP-dependent RNA helicase DDX1	0.181172	0.33984	-0.0575638	0.802734	-0.238735	0.42315	0.0856775	0.567253	0.336442	0.00968586	-0.187799	0.167966	-0.489849	0.0613492	-0.250764	0.117708
P28288	ATP-binding cassette sub-family D member 3	0.189201	0.339975	-0.0441593	0.843097	-0.23336	0.52394	0.0958568	0.572743	0.249214	0.162492	-0.0345679	0.151655	-0.482626	0.0225995	-0.153357	0.358131
Q00341	Vigilin	0.25372	0.340143	0.13405	0.762385	-0.11967	0.847782	0.205852	0.379738	0.619986	0.0105585	-0.275658	0.380443	-0.706656	0.0556208	-0.414134	0.130089
Q6P5S2	Protein LEG1 homolog	-0.934913	0.340257	-0.0672229	0.87574	0.86769	0.260202	-0.587837	0.366887	0.719442	0.315326	-1.65979	0.177732	-0.875488	0.360634	-1.30728	0.105429
Q00765	Receptor expression-enhancing protein 5	0.161941	0.340653	0.216515	0.160517	0.0545738	0.946616	0.18377	0.151754	0.292423	0.0168227	-0.124266	0.699701	-0.195142	0.123939	-0.108652	0.35511
Q86SX6	Glutaredoxin-related protein 5, mitochondrial	-0.504881	0.341077	0.173163	0.597337	0.678045	0.346181	-0.233663	0.547189	-0.254858	0.404189	-0.261357	0.312308	0.329258	0.0635426	0.0211948	0.947617
P84103	Serine/arginine-rich splicing factor 3	0.156262	0.341505	-0.278717	0.0180695	-0.434979	0.0589898	-0.0177293	0.897461	0.418126	0.000627665	-0.320228	0.178194	-0.677175	0.00609715	-0.435856	0.00278447
Q5TDH0	Protein DDI1 homolog 2	-0.129014	0.341571	-0.111172	0.416716	0.0178424	0.953666	-0.121877	0.325058	0.0470164	0.733421	-0.00488354	0.914791	-0.323231	0.127789	-0.168893	0.102328
Q00577	Transcriptional activator protein Pur-alpha	-0.201438	0.342429	0.333176	0.221432	0.534614	0.121004	0.0124072	0.95172	-0.15465	0.360963	0.0198901	0.250533	0.504263	0.0623648	0.167057	0.316989
O75608	Acyl-protein thioesterase 1	0.15215	0.342848	-0.10384	0.638838	-0.255989	0.406142	0.049754	0.737885	0.144736	0.326142	0.0927504	0.851598	-0.335778	0.368193	-0.0949825	0.507851
Q5VU97	VWFA and cache domain-containing protein 1	-0.195418	0.343	-0.294343	#DIV/0!	-0.0989247	#DIV/0!	-0.215203	0.199591	-0.343028	0.148024	0.419231	0.147601	-0.222935	#DIV/0!	0.127825	0.583969
O00748	Cocaine esterase	-0.244279	0.343251	-0.32428	0.250545	-0.0800013	0.579745	-0.276279	0.178843	-0.520105	0.0136492	0.338829	0.124551	0.230757	0.52064	0.243826	0.222361
P51858	Hepatoma-derived growth factor	0.175588	0.34336	-0.102511	0.586297	-0.2781	0.162209	0.0643485	0.713497	0.14234	0.393667	0.0611634	0.892622	-0.292337	0.164913	-0.0779913	0.436695
O00194	Ras-related protein Rab-27B	-0.245794	0.343392	0.203726	0.651161	0.44952	0.293096	-0.0659855	0.796424	-0.296438	0.233978	0.185685	0.7638	0.43333	0.487341	0.230452	0.391441
P42773	Cyclin-dependent kinase 4 inhibitor C	-0.269741	0.343507	-0.0393716	0.872795	0.230369	0.383868	-0.177593	0.434132	-0.313083	0.164344	0.114358	0.720528	0.30748	0.0695975	0.13549	0.495654
P63172	Dynein light chain Tctex-type 1	-0.109027	0.344195	-0.151576	0.39146	-0.0425485	0.818141	-0.126046	0.264265	0.160102	0.145249	-0.242506	0.0434507	-0.242748	0.250292	-0.286149	0.00351637
O60341	Lysine-specific histone demethylase 1A	0.134445	0.34493	-0.168015	0.206384	-0.302461	0.0932312	0.0134612	0.915691	0.374157	0.00411627	-0.165369	0.0297057	-0.681647	0.00533448	-0.360696	0.00243108
Q9NZR1	Tropomodulin-2	-0.160819	0.344983	0.420058	0.255502	0.580877	0.128547	0.0715316	0.711623	-0.365514	0.0240028	0.280935	0.364299	0.853855	0.0712497	0.437045	0.0412566
P13716	Delta-aminolevulinic acid dehydratase	-0.237298	0.34505	0.327495	0.162593	0.564792	0.0839847	-0.0113807	0.958184	-0.260726	0.239603	0.231091	0.363661	0.52712	0.0725025	0.249345	0.267392
P02549	Spectrin alpha chain, erythrocytic 1	-0.225641	0.345597	-0.406325	0.205368	-0.180685	0.625934	-0.297915	0.212428	-0.284709	0.277011	0.0675783	0.920429	-0.195782	0.627781	-0.0132056	0.94422
P08579	U2 small nuclear ribonucleoprotein B''	0.109659	0.345749	-0.0746076	0.420481	-0.184267	0.199243	0.0359526	0.707413	0.279605	0.00352163	-0.19383	0.0437615	-0.335057	0.0313594	-0.243652	0.00421637
P62328	Thymosin beta-4	-0.316262	0.345845	0.0814019	0.839161	0.397664	0.573534	-0.157196	0.572335	0.366007	0.13159	-0.388603	0.457385	-0.444781	0.304794	-0.523204	0.0547524
Q00613	Heat shock factor protein 1	-0.156507	0.346086	-0.0955593	0.408459	0.0609481	0.60735	-0.132128	0.318653	-0.0354978	0.793719	-0.082827	0.567933	-0.0860987	0.595303	-0.0966304	0.366768
P23246	Splicing factor, proline- and glutamine-rich	0.292196	0.346173	-0.331189	0.328539	-0.623384	0.255135	0.0428418	0.859085	0.556048	0.00170627	-0.23223	0.200484	-1.09382	0.0118468	-0.513206	0.0491004
Q9P2J5	Leucine--tRNA ligase, cytoplasmic	0.131592	0.34662	-0.00273446	0.991877	-0.134326	0.617541	0.0778612	0.583814	0.251731	0.0332118	-0.113614	0.214027	-0.322385	0.28363	-0.173869	0.171856
P53007	Tricarboxylate transport protein, mitochondrial	0.439579	0.347091	-0.583151	0.259649	-1.02273	0.170608	0.030487	0.938222	0.615745	0.0825749	-0.172574	0.155249	-1.53722	0.0351814	-0.585258	0.156614
P11166	Solute carrier family 2, facilitated glucose transporter member 1	0.281404	0.347132	-0.325132	0.348192	-0.606536	0.13908	0.0387897	0.886656	0.347647	0.281245	-0.0534215	0.793705	-0.87109	0.235529	-0.308857	0.324488
Q9GZP8	Immortalization up-regulated protein	0.251511	0.347476	-0.376683	0.127709	-0.628194	0.108216	0.000233562	0.999162	-0.172546	0.445496	0.29736	0.571501	0.0456291	0.928327	0.172779	0.49118
Q6IQ22	Ras-related protein Rab-12	0.0937638	0.347558	0.0788409	0.5423	-0.0149229	0.992446	0.0877946	0.364278	0.149216	0.214029	0.0299484	0.90092	-0.182352	0.286715	-0.0614211	0.518722
Q9BUL9	Ribonuclease P protein subunit p25	0.150727	0.347622	0.0897875	0.651101	-0.0609395	0.761907	0.126351	0.37989	0.279912	0.14722	-0.00565147	0.970699	-0.0744711	0.812984	-0.15356	0.37611
Q5SRE5	Nucleoporin NUP188	0.181829	0.348018	0.302307	0.0511155	0.120478	0.997564	0.23002	0.100043	0.237632	0.0408861	-0.0836921	0.7263	0.118257	0.547168	-0.00761109	0.950991
Q7KZF4	Staphylococcal nuclease domain-containing protein 1	0.188659	0.348835	-0.111453	0.67875	-0.300112	0.388248	0.068614	0.686569	0.607103	0.00305876	-0.279168	0.226633	-0.946228	0.000785683	-0.538489	0.0143419
P04275	von Willebrand factor	-0.247158	0.349182	-0.336083	0.181422	-0.0889244	0.590028	-0.282728	0.215269	-0.317049	0.188345	0.151175	0.60175	-0.0129216	0.939156	0.0343213	0.848922
Q16799	Reticulon-1	0.259579	0.349199	0.0249252	0.931119	-0.234654	0.78533	0.165717	0.432492	0.245356	0.16415	-0.0476726	0.514005	-0.145552	0.582014	-0.0796391	0.695872
O95571	Persulfide dioxygenase ETHE1, mitochondrial	0.176331	0.349352	-0.0976915	0.619397	-0.274022	0.202588	0.0667219	0.673725	0.443772	0.00454561	-0.179848	0.420373	-0.689614	0.0313904	-0.37705	0.0120635
P09619	Platelet-derived growth factor receptor beta	-0.119371	0.349626	0.0904612	0.629552	0.209832	0.372739	-0.0354379	0.78406	-0.0627892	0.654508	0.0321221	0.712668	0.101212	0.429144	0.0273513	0.819434
Q12979	Active breakpoint cluster region-related protein	0.215816	0.349689	-0.413625	#DIV/0!	-0.62944	#DIV/0!	0.0899277	0.711401	0.418193	0.0626293	-0.293341	0.169269	-0.740854	#DIV/0!	-0.328266	0.141252
P55072	Transitional endoplasmic reticulum ATPase	-0.097975	0.34992	0.0623335	0.612746	0.160308	0.265546	-0.0338516	0.738915	0.122807	0.270256	-0.0824715	0.714223	-0.174121	0.0834665	-0.156658	0.0757471
O00139	Kinesin-like protein KIF2A	0.236715	0.350063	-0.0844387	0.639026	-0.321154	0.3025	0.108254	0.542562	0.45229	0.00233071	-0.161186	0.310769	-0.612761	0.00364651	-0.344037	0.0598908
Q96RQ1	Endoplasmic reticulum-Golgi intermediate compartment protein 2	0.198498	0.350077	-0.315603	#DIV/0!	-0.514102	#DIV/0!	0.0956779	0.623012	0.673607	0.0450069	-0.297892	0.403341	-1.16643	#DIV/0!	-0.577929	0.0774985
Q8N0X7	Spartin	-0.234916	0.350332	0.145937	0.501193	0.380854	0.209643	-0.00640426	0.970922	-0.0142789	0.915768	-0.151121	0.288508	0.0503549	0.900302	0.00787462	0.963905
Q03518	Antigen peptide transporter 1	0.320838	0.350421	-0.228142	0.609228	-0.548979	0.288824	0.101246	0.746043	1.00597	0.00245576	-0.797687	0.00972797	-1.23616	0.00328708	-0.904722	0.00480164
P21283	V-type proton ATPase subunit C 1	0.110405	0.350918	-0.363207	#DIV/0!	-0.473612	#DIV/0!	0.0156828	0.910746	0.440901	0.0150647	-0.296919	0.355522	-0.837685	#DIV/0!	-0.425219	0.0306591
P12814	Alpha-actinin-1	0.171102	0.351196	-0.115969	0.619074	-0.287071	0.286818	0.0562734	0.705775	0.545443	0.00844468	-0.421721	0.145893	-0.75179	0.0211753	-0.489169	0.0266766
Q96C19	EF-hand domain-containing protein D2	0.198873	0.351227	0.0132967	0.963921	-0.185576	0.562384	0.124642	0.520513	0.894861	9.88679e-05	-0.505634	0.0328612	-1.10713	0.00510999	-0.770219	0.000308934
P25398	40S ribosomal protein S12	0.17849	0.351231	0.045276	0.843866	-0.133214	0.731485	0.125205	0.48045	0.247837	0.162109	-0.0577049	0.433636	-0.06973	0.813669	-0.122632	0.337334
Q9H4G4	Golgi-associated plant pathogenesis-related protein 1	-0.173185	0.351486	0.010434	0.949763	0.183619	0.550865	-0.0997375	0.47351	0.219818	0.0588184	-0.51763	0.106252	-0.0837496	0.522416	-0.319555	0.0209076
P34913	Bifunctional epoxide hydrolase 2	-0.200304	0.351509	0.278712	0.507394	0.479017	0.28122	0.0871056	0.764085	-0.308234	0.281482	-0.0767125	0.930602	1.05946	0.0780867	0.39534	0.216127
P62993	Growth factor receptor-bound protein 2	0.237946	0.351533	-0.0585858	0.773834	-0.296532	0.153279	0.119333	0.566577	0.524561	0.0112014	-0.218414	0.548892	-0.667915	0.0099545	-0.405228	0.0161843
Q14498	RNA-binding protein 39	0.384563	0.351606	-0.303819	0.536725	-0.688382	0.345258	0.10921	0.731686	0.710871	0.00061948	-0.305817	0.321832	-1.19421	0.0391771	-0.60166	0.0726101
Q9NPQ8	Synembryn-A	0.1301	0.351689	-0.0335869	0.829118	-0.163687	0.240481	0.0646251	0.624674	0.50103	0.00150665	-0.305371	0.0463969	-0.682369	0.00140698	-0.436405	0.000218039
P42771	Cyclin-dependent kinase inhibitor 2A	0.398995	0.351892	-0.838015	0.187145	-1.23701	0.0827412	-0.343211	0.528431	-0.603372	0.285338	1.35224	0.245037	0.098251	0.791451	0.260161	0.647169
O60825	6-phosphofructo-2-kinase/fructose-2,6-bisphosphatase 2	0.299953	0.352532	-0.00179373	0.996216	-0.301747	0.60089	0.179254	0.453569	-0.0847554	0.491041	0.347467	0.376079	0.197701	0.65531	0.26401	0.259658
O14980	Exportin-1	0.182425	0.352811	-0.127803	0.62895	-0.310227	0.315296	0.0583335	0.720371	0.430538	0.000674343	-0.242596	0.112073	-0.65153	0.0409394	-0.372205	0.0287459
Q00610	Clathrin heavy chain 1	0.263458	0.354011	-0.193789	0.655179	-0.457247	0.374925	0.0805592	0.751402	0.529745	0.0109135	-0.278105	0.153283	-0.895787	0.0509779	-0.449186	0.0780206
P61326	Protein mago nashi homolog	0.189994	0.35439	-0.251665	0.108778	-0.441659	0.120217	0.0133302	0.935682	0.3823	0.0120486	-0.15865	0.0474274	-0.717929	0.00322956	-0.368969	0.0279167
P17535	Transcription factor JunD	-0.0848876	0.354622	-0.10183	0.485418	-0.0169423	0.824262	-0.0916645	0.293255	0.0257281	0.740442	-0.159693	0.0807951	-0.0255553	0.854441	-0.117393	0.114842
P14621	Acylphosphatase-2	-0.398917	0.354637	-0.110294	0.891836	0.288623	0.869976	-0.283468	0.49958	-0.775088	0.0343689	0.0665546	0.3694	0.992159	0.21298	0.49162	0.236785
P36578	60S ribosomal protein L4	0.262086	0.354863	-0.121223	0.737905	-0.383309	0.356925	0.108763	0.656746	0.570149	0.0105825	-0.26789	0.125112	-0.891219	0.0259396	-0.461387	0.0471383
P02730	Band 3 anion transport protein	-0.306221	0.355323	-0.167271	0.74935	0.13895	0.701124	-0.250641	0.45196	-0.335655	0.33563	0.109415	0.830316	0.0882607	0.857559	0.0850139	0.765013
P02533	Keratin, type I cytoskeletal 14	0.358548	0.355529	-0.829469	0.0239723	-1.18802	0.0020223	-0.116659	0.767646	-0.44388	0.238899	0.692275	0.145842	-0.147718	0.651263	0.327222	0.278276
O43772	Mitochondrial carnitine/acylcarnitine carrier protein	0.21459	0.355542	0.145197	0.633232	-0.0693925	0.641326	0.186833	0.430054	0.27715	0.297266	0.0234549	0.655554	-0.486782	0.196032	-0.0903173	0.597368
O14867	Transcription regulator protein BACH1	-0.142697	0.355558	-0.679511	#DIV/0!	-0.536814	#DIV/0!	-0.25006	0.188431	-0.0941657	0.551094	-0.0738634	0.594805	-0.560014	#DIV/0!	-0.155894	0.293821
Q92556	Engulfment and cell motility protein 1	0.215434	0.355946	-0.176865	0.484151	-0.392299	0.161863	0.0585141	0.772999	0.585072	0.00360412	-0.322295	0.0384136	-0.87655	0.00526256	-0.526558	0.00594099
Q13148	TAR DNA-binding protein 43	0.27093	0.356558	-0.398522	0.190849	-0.669452	0.175925	0.00314949	0.988982	0.416324	0.00420747	-0.160521	0.26199	-0.936786	0.024386	-0.413175	0.0858616
P33241	Lymphocyte-specific protein 1	0.278901	0.356601	-0.140048	0.728366	-0.418949	0.278118	0.111322	0.703261	0.997129	0.00305707	-0.577017	0.101533	-1.24593	0.0182464	-0.885807	0.00190785
P62308	Small nuclear ribonucleoprotein G	0.156714	0.356646	-0.110562	0.577799	-0.267276	0.250285	0.0498038	0.759102	0.229388	0.141444	-0.0158674	0.57873	-0.312171	0.25945	-0.179585	0.107101
Q7Z7K6	Centromere protein V	-0.166705	0.356884	-0.0186538	0.93145	0.148051	0.51087	-0.107484	0.461006	-0.289243	0.069789	0.191737	0.157549	0.183168	0.170917	0.181759	0.278793
O00515	Ladinin-1	0.262701	0.357322	-0.291633	0.0966525	-0.554334	0.144754	0.0409678	0.846469	-0.0837078	0.636434	0.39292	0.333055	-0.169348	0.586731	0.124676	0.56266
Q8NBJ5	Procollagen galactosyltransferase 1	0.178278	0.357622	-0.104652	0.563744	-0.28293	0.272212	0.0651059	0.658103	0.664303	0.000407957	-0.351735	0.127336	-1.00198	0.00152253	-0.599197	0.00252083
P0C263	Serine/threonine-protein kinase SBK2	-0.674365	0.357856	-0.473057	0.716869	0.201309	0.987898	-0.593842	0.374427	-0.915328	0.0717252	-0.0816543	0.885753	0.632801	0.561099	0.321487	0.620282
Q9UMD9	Collagen alpha-1(XVII) chain	0.32996	0.357915	-0.328032	0.31329	-0.657992	0.254483	0.0667629	0.809887	0.270017	0.235933	-0.123887	0.348713	-0.31444	0.220479	-0.203254	0.464467
O75150	E3 ubiquitin-protein ligase BRE1B	0.132042	0.358222	-0.21515	0.28395	-0.347192	0.17634	-0.00683516	0.957605	0.264489	0.00505823	-0.170123	0.123961	-0.498637	0.0209223	-0.271324	0.0365452
Q9HBR0	Putative sodium-coupled neutral amino acid transporter 10	-0.349838	0.358343	0.245879	0.621007	0.595718	0.209235	0.00759238	0.985684	0.0243973	0.956496	-0.332129	0.532589	0.251386	0.51772	-0.0168049	0.963577
Q9BW61	DET1- and DDB1-associated protein 1	-0.119107	0.358819	-0.0677776	0.65388	0.0513299	0.881531	-0.0985755	0.419782	0.0425094	0.723448	-0.178977	0.187179	-0.0635969	0.575576	-0.141085	0.0804369
Q15029	116 kDa U5 small nuclear ribonucleoprotein component	0.166383	0.358999	-0.0192165	0.918125	-0.1856	0.584608	0.0921434	0.518228	0.450312	0.00107048	-0.320845	0.0109906	-0.514981	0.019208	-0.358169	0.012932
Q9Y6N5	Sulfide:quinone oxidoreductase, mitochondrial	0.203657	0.359438	-0.29662	0.336048	-0.500277	0.191186	0.00354645	0.986419	0.583577	0.0112127	-0.49697	0.00271683	-0.975726	0.0327951	-0.580031	0.0162883
P05455	Lupus La protein	0.224706	0.359556	-0.127542	0.587196	-0.352248	0.454002	0.0838065	0.633333	0.310068	0.0069969	-0.057824	0.379883	-0.533932	0.0607076	-0.226261	0.212287
Q8NE71	ATP-binding cassette sub-family F member 1	0.135868	0.359697	0.012148	0.944737	-0.12372	0.64991	0.0863797	0.428144	0.351935	0.001261	-0.194863	0.0617381	-0.419043	0.0292702	-0.265555	0.0468815
Q9UNE7	E3 ubiquitin-protein ligase CHIP	0.112307	0.359809	-0.0686814	0.569949	-0.180988	0.398304	0.0399114	0.675577	-0.0252606	0.739093	0.0807666	0.808303	-0.0177016	0.885782	0.065172	0.474079
P27482	Calmodulin-like protein 3	0.358157	0.359951	-0.705327	0.128326	-1.06348	0.107125	-0.0672365	0.840269	-0.692121	0.0234001	1.06959	0.0289082	0.260242	0.683591	0.624884	0.106039
P51003	Poly(A) polymerase alpha	0.160153	0.359989	-0.115576	0.468885	-0.275729	0.13087	0.0498613	0.752683	0.506462	0.00320037	-0.301204	0.0747087	-0.703353	0.0024381	-0.456601	0.000268426
P15311	Ezrin	0.187206	0.360208	-0.348745	0.32907	-0.535951	0.211687	-0.0271746	0.893286	0.41821	0.00853513	-0.242648	0.227799	-0.780563	0.093739	-0.445385	0.0347972
Q9UPU7	TBC1 domain family member 2B	0.179095	0.360241	0.0372832	0.907377	-0.141812	0.695485	0.12237	0.481963	0.429548	0.00395094	-0.209408	0.0894151	-0.458052	0.124539	-0.307178	0.0845837
Q13422	DNA-binding protein Ikaros	0.389746	0.360288	-0.310767	0.527046	-0.700513	0.104188	0.109541	0.772035	1.09832	0.0041907	-0.712058	0.0699487	-1.43797	0.0094084	-0.988777	0.00607658
Q9NZD2	Glycolipid transfer protein	0.200464	0.360315	-0.22217	0.446135	-0.422634	0.268	0.0314104	0.87426	-0.0573265	0.799925	0.288381	0.452363	-0.0732783	0.854331	0.088737	0.705725
Q8IYK4	Procollagen galactosyltransferase 2	0.288073	0.360731	-0.186837	0.533011	-0.474911	0.290723	0.0981091	0.672266	0.779761	0.000572392	-0.371969	0.251415	-1.24359	0.00438803	-0.681652	0.0135937
Q8TEA8	D-aminoacyl-tRNA deacylase 1	-0.170731	0.360732	-0.194301	#DIV/0!	-0.0235698	#DIV/0!	-0.175445	0.328705	-0.369316	0.0589114	0.282294	0.383051	0.0913059	#DIV/0!	0.193871	0.0641819
Q9NUQ6	SPATS2-like protein	-0.269937	0.360843	0.197917	0.506691	0.467854	0.201273	0.0107751	0.965576	0.0774566	0.708843	-0.371458	0.172941	0.00191322	0.802198	-0.0666815	0.755495
P30876	DNA-directed RNA polymerase II subunit RPB2	0.183226	0.361067	-0.227379	0.394241	-0.410604	0.289953	0.018984	0.908283	0.20062	0.137296	0.0344103	0.883113	-0.509752	0.0297613	-0.181636	0.330355
Q96K21	Abscission/NoCut checkpoint regulator	1.39052	0.361075	-0.121396	0.952527	-1.51191	0.485014	0.48337	0.734272	0.56447	0.642972	0.28493	0.367586	-1.23165	0.587386	-0.0811002	0.950024
Q96EI5	Transcription elongation factor A protein-like 4	-0.162682	0.36126	-0.0597774	0.840329	0.102905	0.698808	-0.12152	0.4536	-0.0195754	0.863855	-0.0962688	0.653499	-0.117344	0.625323	-0.101945	0.474869
Q6IAN0	Dehydrogenase/reductase SDR family member 7B	0.310329	0.361382	0.38138	0.320045	0.0710511	0.920151	0.338749	0.181445	0.219969	0.189199	0.0154245	0.756979	0.218848	0.524972	0.11878	0.600422
Q13761	Runt-related transcription factor 3	0.185827	0.361393	-0.345941	#DIV/0!	-0.531767	#DIV/0!	0.0794732	0.700365	0.575374	0.00477896	-0.516134	0.190142	-0.794728	#DIV/0!	-0.495901	0.0289333
Q13740	CD166 antigen	-0.499398	0.361561	0.402604	0.491997	0.902001	0.178603	0.0418031	0.933893	-0.120917	0.771116	-0.537008	0.108142	0.82219	0.447532	0.16272	0.673015
P10643	Complement component C7	-0.106421	0.361671	0.13212	0.457784	0.238541	0.201625	-0.0110043	0.928082	-0.217261	0.0719582	0.124295	0.109867	0.389611	0.0153641	0.206256	0.0414472
P43403	Tyrosine-protein kinase ZAP-70	0.381518	0.361968	0.00561204	0.990436	-0.375906	0.361004	0.231156	0.516074	1.03359	0.00665924	-0.598842	0.217935	-0.921104	0.0633229	-0.802433	0.019951
P01034	Cystatin-C	-0.203633	0.362302	0.201931	0.742329	0.405564	0.424721	-0.0414076	0.883524	-0.314384	0.152387	0.0424849	0.840125	0.703046	0.260227	0.272976	0.312198
P49458	Signal recognition particle 9 kDa protein	0.142174	0.36265	-0.0246156	0.907501	-0.166789	0.374169	0.0754579	0.634816	0.231958	0.142591	-0.089969	0.35219	-0.210538	0.420899	-0.1565	0.0991762
Q32P28	Prolyl 3-hydroxylase 1	0.304401	0.363019	0.207041	0.622259	-0.0973601	0.892599	0.265457	0.278313	0.824004	0.00336924	-0.400479	0.480802	-0.931503	0.0329538	-0.558547	0.0830582
Q9BQE3	Tubulin alpha-1C chain	0.204715	0.363038	-0.492688	#DIV/0!	-0.697403	#DIV/0!	0.0652346	0.785862	0.184822	0.290413	-0.0224231	0.573631	-0.635193	#DIV/0!	-0.119587	0.582664
Q7L2J0	7SK snRNA methylphosphate capping enzyme	0.123345	0.363207	-0.112784	0.418765	-0.236128	0.161575	0.0288935	0.818258	0.0972632	0.398353	0.0859027	0.907418	-0.247252	0.0473655	-0.0683697	0.410765
P05109	Protein S100-A8	0.237703	0.363362	-0.775747	0.126032	-1.01345	0.079307	-0.167677	0.590294	0.119323	0.66863	0.298149	0.547813	-1.13363	0.178974	-0.287	0.350802
Q6ZMP0	Thrombospondin type-1 domain-containing protein 4	-0.298836	0.363898	0.268855	0.660199	0.567691	0.246958	-0.0717598	0.823306	-0.606398	0.0128323	0.291818	0.832712	0.899575	0.186366	0.534639	0.0937451
P14314	Glucosidase 2 subunit beta	-0.0980667	0.363927	0.0754259	0.662294	0.173493	0.256429	-0.0286696	0.79818	0.254987	0.0684301	-0.269637	0.0567855	-0.309261	0.00668572	-0.283656	0.0292924
O75937	DnaJ homolog subfamily C member 8	0.2113	0.364766	-0.144854	0.51013	-0.356154	0.32456	0.0688387	0.693165	0.601177	0.000185725	-0.371594	0.0522188	-0.847908	0.00700631	-0.532338	0.00719597
P49748	Very long-chain specific acyl-CoA dehydrogenase, mitochondrial	0.208697	0.365014	0.0627253	0.908232	-0.145972	0.682958	0.150308	0.578788	0.0434896	0.858297	0.0482905	0.450453	-0.0679332	0.90793	0.106819	0.663127
Q8WUY3	Protein prune homolog 2	0.221334	0.365186	0.0475892	#DIV/0!	-0.173745	#DIV/0!	0.186585	0.356432	0.00290299	0.982772	0.11414	0.0286169	0.148977	#DIV/0!	0.183682	0.312026
Q460N5	Protein mono-ADP-ribosyltransferase PARP14	0.445666	0.365303	-0.178872	#DIV/0!	-0.624538	#DIV/0!	0.320758	0.463304	1.42954	0.00202102	-1.14532	0.00364688	-1.44697	#DIV/0!	-1.10878	0.0179548
Q96A33	PAT complex subunit CCDC47	0.109408	0.365353	-0.0622733	0.759611	-0.171681	0.520322	0.0407356	0.716226	0.355865	0.00522419	-0.174595	0.163625	-0.571854	0.0116501	-0.315129	0.0239757
Q9UN37	Vacuolar protein sorting-associated protein 4A	0.111528	0.365527	0.166764	0.308408	0.0552355	0.939865	0.133622	0.243667	0.260985	0.0186136	-0.141228	0.52946	-0.0876724	0.454472	-0.127363	0.105755
P32942	Intercellular adhesion molecule 3	-0.24552	0.365556	-0.35533	0.24162	-0.109809	0.656053	-0.289444	0.254047	0.221807	0.438007	-0.20505	0.384813	-0.692321	0.00454374	-0.511251	0.0263668
Q96I24	Far upstream element-binding protein 3	0.168912	0.365676	-0.161952	0.433782	-0.330864	0.264748	0.0365664	0.812104	0.418317	0.0036323	-0.161609	0.136554	-0.757467	0.00907356	-0.381751	0.0187404
O95104	SR-related and CTD-associated factor 4	-0.145951	0.366062	-0.184562	0.292903	-0.0386109	0.778882	-0.161396	0.215361	0.099073	0.341001	-0.201916	0.100373	-0.315343	0.0691718	-0.260469	0.0181117
Q9Y6D9	Mitotic spindle assembly checkpoint protein MAD1	0.160888	0.3667	-0.188274	0.549284	-0.349162	0.284493	-0.0486091	0.829829	0.274183	0.241239	-0.245034	0.00598294	-0.638522	0.225938	-0.322792	0.184789
Q9H9C1	Spermatogenesis-defective protein 39 homolog	0.116616	0.366805	0.0485306	0.854554	-0.0680852	0.645477	0.0893818	0.479337	0.202617	0.0279518	-0.0352227	0.723118	-0.231505	0.420041	-0.113235	0.369769
Q7Z4V5	Hepatoma-derived growth factor-related protein 2	0.106274	0.366859	-0.0548514	0.770527	-0.161126	0.420017	0.041824	0.717091	0.269813	0.0155526	-0.148904	0.176663	-0.379427	0.0967928	-0.227989	0.0307968
Q02083	N-acylethanolamine-hydrolyzing acid amidase	-0.255515	0.367138	-0.0140608	0.967749	0.241454	0.775058	-0.158933	0.542251	0.170436	0.513784	-0.336387	0.241042	-0.115552	0.532397	-0.329369	0.125839
Q9Y5P6	Mannose-1-phosphate guanyltransferase beta	-0.201535	0.367166	0.329787	0.289201	0.531322	0.166959	0.0109936	0.9606	0.15042	0.455818	-0.165283	0.811059	0.0646509	0.768246	-0.139427	0.458224
Q6UX04	Spliceosome-associated protein CWC27 homolog	-0.135748	0.367306	-0.2503	#DIV/0!	-0.114552	#DIV/0!	-0.158658	0.299916	-0.284363	0.0861712	0.168571	0.0262989	0.0141071	#DIV/0!	0.125704	0.0176518
Q86YS6	Ras-related protein Rab-43	-0.0886303	0.367362	0.0670509	0.74712	0.155681	0.480355	-0.0263578	0.813488	0.241107	0.0223323	-0.333276	0.0555003	-0.175447	0.156493	-0.267465	0.0112949
Q9UPT8	Zinc finger CCCH domain-containing protein 4	0.140588	0.367865	-0.0208806	0.929294	-0.161468	0.730137	0.0760003	0.551667	0.310055	0.00123593	-0.0754089	0.267812	-0.39372	0.125998	-0.234055	0.0934237
Q9BTV4	Transmembrane protein 43	0.144528	0.367969	-0.0584588	0.758262	-0.202987	0.322937	0.0633333	0.650918	0.111649	0.344909	-0.0591918	0.804607	-0.130484	0.467149	-0.0483158	0.657623
O43491	Band 4.1-like protein 2	-0.208569	0.368022	-0.00113437	0.996528	0.207434	0.704149	-0.125595	0.487126	-0.100401	0.43383	-0.133148	0.868408	0.176985	0.538242	-0.0251935	0.874113
P19237	Troponin I, slow skeletal muscle	0.692416	0.368149	0.559999	0.637607	-0.132418	0.627947	0.639449	0.344336	-0.132845	0.804608	0.584056	0.051292	0.885804	0.505239	0.772294	0.222704
Q96AT1	Uncharacterized protein KIAA1143	-0.35197	0.368426	-0.0932472	0.704489	0.258723	0.494155	-0.196736	0.323419	-0.0749692	0.576518	-0.249508	0.534719	0.0627468	0.822091	-0.121767	0.473511
Q8IVU3	Probable E3 ubiquitin-protein ligase HERC6	-0.43631	0.368975	-0.0877988	0.720005	0.348512	0.448296	-0.227203	0.313824	0.24774	0.294303	-0.471682	0.602112	-0.307379	0.405023	-0.474943	0.0833328
Q14CN2	Calcium-activated chloride channel regulator 4	0.449663	0.369056	-1.10244	0.0817436	-1.5521	0.0272833	-0.481598	0.448433	-0.614153	0.29149	1.20554	0.0938348	-0.0808264	0.833123	0.132554	0.804509
Q7Z3C6	Autophagy-related protein 9A	0.0959385	0.369255	0.0341314	0.775561	-0.0618071	0.490044	0.0712156	0.454586	0.0288219	0.768237	0.0379373	0.498193	0.015081	0.931079	0.0423938	0.588453
P31943	Heterogeneous nuclear ribonucleoprotein H	0.145405	0.36966	-0.256552	0.10567	-0.401957	0.101816	-0.0153778	0.909704	0.239727	0.0260465	-0.0458562	0.425754	-0.577568	0.0176536	-0.255105	0.0606259
P40306	Proteasome subunit beta type-10	0.146672	0.369738	-0.0264301	0.942157	-0.173102	0.641845	0.0774309	0.653738	0.446865	0.0168416	-0.386026	0.0500644	-0.270331	0.621532	-0.369434	0.0818592
Q9H3Q1	Cdc42 effector protein 4	-0.137775	0.369924	-0.0135872	0.945482	0.124188	0.540005	-0.0880998	0.49288	-0.0892361	0.502368	0.0731047	0.800518	0.0601985	0.759084	0.00113633	0.993584
P02748	Complement component C9	-0.172679	0.369945	0.362406	0.243957	0.535085	0.159899	0.0413552	0.831279	-0.204431	0.336155	0.21685	0.413793	0.445978	0.259557	0.245786	0.287893
P16278	Beta-galactosidase	-0.162824	0.370234	0.114115	0.537613	0.276939	0.272327	-0.0520487	0.735939	0.3044	0.0463242	-0.283747	0.0742241	-0.396698	0.0631198	-0.356449	0.0169618
P56545	C-terminal-binding protein 2	-0.240504	0.37028	-0.411305	0.262142	-0.170801	0.63657	-0.308824	0.156683	0.0170228	0.907899	-0.192922	0.530943	-0.514937	0.134807	-0.325847	0.105532
Q6NUQ4	Transmembrane protein 214	0.161692	0.370564	0.0395001	0.901758	-0.122192	0.697473	0.112815	0.520693	0.521406	0.0167877	-0.337008	0.234154	-0.679264	0.00865175	-0.408591	0.0612306
Q8WUQ7	Cactin	0.141368	0.370725	-0.14227	0.392716	-0.283638	0.24696	0.0279127	0.814937	0.192658	0.106148	-0.0389156	0.666904	-0.396967	0.0822484	-0.164745	0.268429
Q9HB58	Sp110 nuclear body protein	-0.159025	0.370814	-0.267243	#DIV/0!	-0.108218	#DIV/0!	-0.180669	0.24772	-0.028389	0.808232	-0.183332	0.870194	-0.186159	#DIV/0!	-0.15228	0.216023
P22102	Trifunctional purine biosynthetic protein adenosine-3	0.124598	0.370996	-0.0689592	0.55395	-0.193558	0.217681	0.0471754	0.6845	0.406956	0.00168149	-0.154941	0.0547579	-0.606566	0.00974319	-0.359781	0.00145532
Q9UHD2	Serine/threonine-protein kinase TBK1	-0.299574	0.371037	-0.105284	#DIV/0!	0.194289	#DIV/0!	-0.260716	0.427564	0.0356124	0.922007	-0.167035	0.911712	-0.309047	#DIV/0!	-0.296328	0.232231
Q5K651	Sterile alpha motif domain-containing protein 9	0.351312	0.371124	-0.285702	#DIV/0!	-0.637014	#DIV/0!	0.223909	0.531771	0.419186	0.243725	-0.33481	0.873835	-0.437953	#DIV/0!	-0.195277	0.592186
Q01546	Keratin, type II cytoskeletal 2 oral	-0.679536	0.37141	0.53701	0.623202	1.21655	0.154312	-0.192918	0.796824	-1.66184	0.0159895	1.01553	0.0811477	2.18526	0.0813241	1.46892	0.0102421
P63010	AP-2 complex subunit beta	0.161774	0.371857	0.0424847	0.888522	-0.11929	0.840879	0.114059	0.494886	0.455822	0.00369356	-0.26974	0.0270139	-0.525065	0.0368618	-0.341764	0.045386
P78318	Immunoglobulin-binding protein 1	0.119452	0.372528	-0.0062206	0.963516	-0.125673	0.70579	0.069183	0.530213	0.174048	0.0748903	0.00344138	0.488478	-0.201531	0.291723	-0.104865	0.230452
Q8IZ83	Aldehyde dehydrogenase family 16 member A1	0.135463	0.372722	-0.123773	0.473595	-0.259236	0.313918	0.0317686	0.799185	0.209731	0.0399585	0.0269085	0.915461	-0.448536	0.0308239	-0.177962	0.138608
P08865	40S ribosomal protein SA	0.127492	0.37289	0.0411274	0.765837	-0.0863646	0.742764	0.0929462	0.412466	0.140228	0.296077	0.134442	0.56707	-0.0999279	0.701434	-0.0472822	0.714111
Q9HAV7	GrpE protein homolog 1, mitochondrial	0.167971	0.372921	-0.207838	0.157519	-0.375809	0.0207626	0.0176473	0.909951	0.453815	0.00372767	-0.300674	0.0283622	-0.787111	0.00889147	-0.436168	0.00494765
P30040	Endoplasmic reticulum resident protein 29	-0.218557	0.37305	-0.0563585	0.865941	0.162198	0.646728	-0.153677	0.460661	0.553508	0.0134511	-0.649961	0.0211022	-0.787895	0.0250251	-0.707185	0.00450614
P08779	Keratin, type I cytoskeletal 16	0.478617	0.373591	-1.31989	0.00815728	-1.79851	0.00144065	-0.240786	0.651978	-0.922254	0.0538939	1.41484	0.0557125	-0.228028	0.706532	0.681469	0.142236
Q9UMR2	ATP-dependent RNA helicase DDX19B	0.0719054	0.373673	-0.0528127	0.656423	-0.124718	0.333216	0.0220181	0.780008	0.162555	0.0451345	-0.0587301	0.291078	-0.241714	0.148671	-0.140537	0.0555226
P55735	Protein SEC13 homolog	0.168219	0.373676	-0.22362	0.657435	-0.391839	0.483303	0.0114833	0.960949	0.480966	0.0124766	-0.262086	0.200314	-0.845551	0.130302	-0.469482	0.0501333
Q9BQS8	FYVE and coiled-coil domain-containing protein 1	-0.113207	0.373814	0.137732	0.558495	0.250939	0.347687	-0.0128309	0.926221	-0.245262	0.0533692	0.0832274	0.380675	0.412261	0.260869	0.232431	0.0500346
P38606	V-type proton ATPase catalytic subunit A	0.11817	0.373823	-0.0382096	0.84849	-0.15638	0.57925	0.0556184	0.648451	0.351113	0.0043723	-0.216033	0.0144507	-0.399827	0.0169096	-0.295495	0.0186839
O75368	SH3 domain-binding glutamic acid-rich-like protein	-0.229224	0.374734	-0.00399609	0.990979	0.225228	0.436999	-0.139133	0.572966	-0.0541611	0.834049	0.101797	0.762132	-0.0106305	0.977489	-0.0849718	0.693245
O95299	NADH dehydrogenase [ubiquinone] 1 alpha subcomplex subunit 10, mitochondrial	0.216386	0.374889	-0.360093	0.272852	-0.57648	0.0979858	-0.129502	0.655043	0.0573114	0.846311	-0.0781572	0.771106	-0.44872	0.146215	-0.186813	0.49991
Q00839	Heterogeneous nuclear ribonucleoprotein U	0.276196	0.375061	-0.350691	0.338065	-0.626887	0.245595	0.0254415	0.920115	0.584194	0.00167197	-0.325115	0.173599	-1.08109	0.0171975	-0.558753	0.0324147
Q01740	Dimethylaniline monooxygenase [N-oxide-forming] 1	0.324953	0.375132	0.18606	#DIV/0!	-0.138893	#DIV/0!	0.297175	0.295433	0.207104	0.12058	0.066985	0.246912	0.0298196	#DIV/0!	0.0900703	0.73936
Q14195	Dihydropyrimidinase-related protein 3	-0.14178	0.375228	0.0236889	0.89725	0.165469	0.669853	-0.0755925	0.546016	-0.0610106	0.565498	-0.124929	0.843881	0.100949	0.628997	-0.0145818	0.908729
P30405	Peptidyl-prolyl cis-trans isomerase F, mitochondrial	0.215544	0.375287	-0.311837	0.528204	-0.527381	0.223037	0.00459181	0.986901	0.433163	0.113061	-0.290295	0.204759	-0.841602	0.0392919	-0.428571	0.0991211
Q96AG3	Mitochondrial outer membrane protein SLC25A46	-0.118542	0.375319	-0.0248979	0.859061	0.0936441	0.596265	-0.0810844	0.475992	-0.282328	0.0170201	0.186802	0.109897	0.257896	0.108603	0.201244	0.0410341
P00167	Cytochrome b5	-0.216708	0.375323	-0.352256	0.0574171	-0.135547	0.885233	-0.270927	0.152784	-0.574592	0.00978764	0.576882	0.153224	0.174285	0.535441	0.303665	0.117075
O94875	Sorbin and SH3 domain-containing protein 2	-0.312219	0.375335	-0.266733	0.592184	0.0454851	0.99228	-0.294025	0.358599	-0.415212	0.17861	-0.0223361	0.930967	0.180707	0.653676	0.121187	0.661241
Q13085	Acetyl-CoA carboxylase 1	0.174166	0.375397	-0.238499	0.296181	-0.412665	0.111582	0.00910043	0.955583	0.106956	0.410174	0.164026	0.117628	-0.388895	0.0734628	-0.0978554	0.550099
P84098	60S ribosomal protein L19	0.236291	0.375775	-0.0375409	0.912915	-0.273832	0.505484	0.126758	0.596098	0.456399	0.0377474	-0.159222	0.211342	-0.669517	0.0271885	-0.329641	0.0900233
P10155	RNA-binding protein RO60	0.17481	0.375964	-0.0107335	0.949291	-0.185543	0.699766	0.100592	0.490044	0.291429	0.0103043	-0.118741	0.169298	-0.343848	0.0691758	-0.190836	0.133644
Q9H0L4	Cleavage stimulation factor subunit 2 tau variant	-0.295191	0.376037	-1.02894	#DIV/0!	-0.73375	#DIV/0!	-0.441941	0.228599	-0.104101	0.746532	-0.153643	0.711956	-0.962287	#DIV/0!	-0.33784	0.096863
P48960	Adhesion G protein-coupled receptor E5	0.139796	0.376463	0.431975	0.119616	0.29218	0.17649	0.256668	0.139898	0.797439	0.00385609	-0.375592	0.054895	-0.382709	0.143257	-0.540771	0.0267752
Q9UKR3	Kallikrein-13	-0.251628	0.376663	-0.0698659	0.723831	0.181762	0.963118	-0.178923	0.430273	-0.206267	0.552511	0.28285	0.094187	0.00970679	0.989217	0.0273435	0.931268
Q8N1G4	Leucine-rich repeat-containing protein 47	0.13627	0.377154	0.162844	0.376773	0.026574	0.828724	0.1469	0.261786	0.133378	0.20289	0.0337541	0.32415	0.00884097	0.948943	0.013522	0.879607
P07686	Beta-hexosaminidase subunit beta	-0.139411	0.377183	0.278856	0.300407	0.418267	0.107274	0.0278958	0.877545	0.22628	0.230102	-0.1798	0.287331	-0.0639591	0.797274	-0.198384	0.206222
Q6NUK1	Calcium-binding mitochondrial carrier protein SCaMC-1	0.213083	0.37778	-0.104212	0.702722	-0.317295	0.407226	0.0861651	0.676727	0.482881	0.021118	-0.265496	0.0580937	-0.813002	0.0148013	-0.396716	0.047496
P08397	Porphobilinogen deaminase	-0.111912	0.377904	0.0932519	0.504631	0.205164	0.13728	-0.0298464	0.810039	0.0528645	0.68853	-0.122315	0.48656	-0.00449151	0.980011	-0.0827109	0.374472
Q9BRX8	Peroxiredoxin-like 2A	0.140259	0.378151	-0.43052	0.0213898	-0.570779	0.00478495	-0.088053	0.612279	-0.062767	0.704666	0.11499	0.212011	-0.19163	0.205632	-0.025286	0.866736
Q9H6F5	Coiled-coil domain-containing protein 86	0.249183	0.378758	-0.100363	#DIV/0!	-0.349547	#DIV/0!	0.179274	0.460411	0.687544	0.0155368	-0.335888	0.906086	-0.890381	#DIV/0!	-0.50827	0.0784698
Q13492	Phosphatidylinositol-binding clathrin assembly protein	0.187635	0.378963	0.0352382	0.915396	-0.152396	0.724912	0.126676	0.483578	0.385218	0.00266328	-0.15649	0.211746	-0.427277	0.257025	-0.258542	0.144705
P05164	Myeloperoxidase	0.235787	0.379407	0.393966	0.52865	0.158179	0.807715	0.299059	0.326907	1.33592	0.0276346	-0.664415	0.478289	-1.53173	0.158195	-1.03686	0.0779438
Q9BU61	NADH dehydrogenase [ubiquinone] 1 alpha subcomplex assembly factor 3	-0.321531	0.379866	-0.567056	0.0782581	-0.245525	0.456695	-0.468846	0.126996	-0.649376	0.0519003	0.228035	0.128449	0.061779	0.491546	0.18053	0.211567
Q92905	COP9 signalosome complex subunit 5	-0.0941825	0.380293	-0.0182519	0.920316	0.0759305	0.66872	-0.0638103	0.542015	0.00485674	0.960785	-0.108307	0.43706	-0.111035	0.49046	-0.068667	0.486881
P43405	Tyrosine-protein kinase SYK	0.330523	0.381296	-0.583618	0.447046	-0.914141	0.242286	-0.0351336	0.93007	0.983851	0.00158155	-0.516695	0.231832	-1.85049	0.0389123	-1.01898	0.0139754
A5YKK6	CCR4-NOT transcription complex subunit 1	0.134544	0.381321	-0.0721481	0.684119	-0.206692	0.375119	0.051867	0.662844	0.225633	0.00981894	-0.064189	0.567194	-0.353948	0.027059	-0.173766	0.14599
P33316	Deoxyuridine 5'-triphosphate nucleotidohydrolase, mitochondrial	0.0938702	0.381421	-0.0403104	0.70915	-0.134181	0.18511	0.040198	0.686257	0.0532795	0.614647	0.07603	0.328222	-0.168587	0.291401	-0.0130815	0.8623
Q96JM3	Chromosome alignment-maintaining phosphoprotein 1	0.270919	0.38161	-0.139208	0.517373	-0.410127	0.406504	0.106868	0.64089	-0.10758	0.550318	0.420764	0.0100112	-0.0237904	0.868913	0.214448	0.28752
P48449	Lanosterol synthase	0.150856	0.381679	-0.0260678	0.905126	-0.176924	0.553075	0.0800865	0.603103	0.234024	0.138251	-0.0775131	0.28048	-0.378518	0.122901	-0.153938	0.285713
Q99805	Transmembrane 9 superfamily member 2	-0.731887	0.381894	0.174295	0.817118	0.906181	0.324621	-0.188178	0.768903	0.13461	0.813094	-1.05268	0.0572779	-0.219387	0.624378	-0.322787	0.5346
Q99459	Cell division cycle 5-like protein	0.197635	0.381992	-0.141578	0.627045	-0.339213	0.433121	0.0619494	0.736556	0.442012	0.00348234	-0.294262	0.0834118	-0.611378	0.0130412	-0.380062	0.0516266
P02545	Prelamin-A/C	0.310554	0.382705	-0.267265	0.616064	-0.577819	0.406099	0.0794265	0.79883	0.252955	0.239116	-0.143281	0.610467	-0.485759	0.333747	-0.173529	0.55237
P01624	Immunoglobulin kappa variable 3-15	-0.326029	0.382833	0.91542	0.00454278	1.24145	0.00584717	0.17055	0.620352	-0.35932	0.273601	0.422183	0.396246	1.16421	0.0686153	0.52987	0.165515
Q10713	Mitochondrial-processing peptidase subunit alpha	0.126952	0.383645	0.150595	0.292562	0.0236431	0.778068	0.136409	0.302258	0.396007	0.00742326	-0.222619	0.224079	-0.393423	0.0399137	-0.259598	0.0044511
Q9UL46	Proteasome activator complex subunit 2	0.234342	0.383915	-0.0253094	0.933489	-0.259652	0.312174	0.130482	0.59745	0.99128	0.0012006	-0.73527	0.0216892	-0.994193	0.024808	-0.860798	0.00062874
Q86Y56	Dynein axonemal assembly factor 5	0.101063	0.384502	0.0109338	0.950371	-0.0901288	0.42828	0.0650111	0.538525	0.0646779	0.466588	0.103133	0.280114	-0.0668509	0.690893	0.000333209	0.997106
Q8N9N2	Activating signal cointegrator 1 complex subunit 1	0.139186	0.384551	0.178164	#DIV/0!	0.0389781	#DIV/0!	0.146982	0.314023	0.504479	0.00380688	-0.305101	0.551832	-0.386506	#DIV/0!	-0.357497	0.00680307
P21695	Glycerol-3-phosphate dehydrogenase [NAD(+)], cytoplasmic	-0.541947	0.384576	-0.183266	0.767339	0.358681	0.844809	-0.398475	0.37028	-0.908651	0.026182	0.392523	0.0708058	0.964364	0.230998	0.510176	0.304118
P62318	Small nuclear ribonucleoprotein Sm D3	0.137212	0.384594	-0.0114858	0.952853	-0.148697	0.333235	0.0777326	0.600463	0.275557	0.0727472	-0.031533	0.943809	-0.387037	0.21535	-0.197825	0.0848113
Q9H4E7	Differentially expressed in FDCP 6 homolog	0.163503	0.384663	0.0950136	0.728521	-0.0684889	0.802534	0.136107	0.396159	0.548688	0.00123202	-0.344881	0.105264	-0.466397	0.0140893	-0.412581	0.0215723
Q9UI42	Carboxypeptidase A4	0.314165	0.385226	0.169385	0.630176	-0.14478	0.788386	0.256253	0.337203	-0.289208	0.178599	0.718063	0.274083	0.445066	0.183677	0.545461	0.0412863
O75131	Copine-3	0.124852	0.38525	-0.0923909	0.62043	-0.217243	0.480302	0.037955	0.749221	0.174484	0.0411555	0.0308383	0.790422	-0.354448	0.112803	-0.136529	0.227236
Q16775	Hydroxyacylglutathione hydrolase, mitochondrial	-0.302246	0.385328	-0.27562	0.605045	0.0266253	0.864436	-0.291595	0.356741	-0.486851	0.0795955	0.126842	0.203914	0.262341	0.547294	0.195256	0.47218
Q9Y385	Ubiquitin-conjugating enzyme E2 J1	0.206754	0.385333	-0.247241	0.469405	-0.453996	0.290093	0.025156	0.90518	0.935751	0.00625138	-0.404864	0.106597	-1.57808	0.0157647	-0.910595	0.00997304
Q15172	Serine/threonine-protein phosphatase 2A 56 kDa regulatory subunit alpha isoform	0.0817772	0.385551	-0.0424322	0.860808	-0.124209	0.605026	0.00725154	0.96077	0.0262184	0.829713	0.0239703	0.240095	-0.0266584	0.184284	-0.0189669	0.898311
P11274	Breakpoint cluster region protein	0.0878492	0.385972	-0.0706944	0.676459	-0.158544	0.403292	0.0244318	0.804956	0.192534	0.0542744	-0.0258033	0.786895	-0.341212	0.0816434	-0.168102	0.104613
Q14919	Dr1-associated corepressor	-0.11075	0.386046	-0.0137513	0.910907	0.0969989	0.447619	-0.0525509	0.620461	0.380463	0.00764134	-0.401015	0.190186	-0.375061	0.104321	-0.433014	0.000731284
Q01844	RNA-binding protein EWS	0.253712	0.386128	-0.413699	0.235697	-0.667411	0.188464	-0.0132527	0.955722	0.467838	0.0044284	-0.205698	0.30125	-1.04156	0.0225224	-0.481091	0.0566487
Q6P5Q4	Leiomodin-2	0.332479	0.386244	0.106947	0.900095	-0.225532	0.690294	0.242267	0.544803	-0.268705	0.535961	0.32732	0.219763	0.192126	0.804958	0.510972	0.316314
P16383	Intron Large complex component GCFC2	0.162189	0.386449	0.0812163	#DIV/0!	-0.0809731	#DIV/0!	0.145995	0.373103	0.247504	0.134668	0.0297438	0.785237	-0.281346	#DIV/0!	-0.101509	0.486995
Q99460	26S proteasome non-ATPase regulatory subunit 1	0.0931088	0.386633	0.00631291	0.964078	-0.0867959	0.619779	0.0583905	0.541644	0.188482	0.0327013	-0.0543113	0.554814	-0.254222	0.103232	-0.130091	0.0989085
P16452	Protein 4.2	-0.251749	0.38705	-0.135245	0.785273	0.116505	0.758652	-0.205148	0.481788	-0.39504	0.179699	0.168262	0.577253	0.234731	0.607849	0.189893	0.472472
P08571	Monocyte differentiation antigen CD14	-0.155904	0.387786	0.312931	0.1453	0.468836	0.0152469	0.0316299	0.870277	0.210611	0.375933	-0.00391757	0.897357	-0.128945	0.575235	-0.178982	0.350992
Q9C037	E3 ubiquitin-protein ligase TRIM4	0.171115	0.38802	-0.248663	#DIV/0!	-0.419778	#DIV/0!	0.0871595	0.657868	0.461263	0.0301018	-0.312173	0.0203961	-0.687901	#DIV/0!	-0.374103	0.0600236
A0A1B0GVR7	Protein FAM240C	1.21259	0.3885	-0.860702	0.636153	-2.07329	0.31831	-0.0313867	0.980285	-0.285832	0.760199	1.20124	0.156395	-0.830981	0.94003	0.254445	0.830217
P61201	COP9 signalosome complex subunit 2	0.145821	0.388578	-0.0843992	0.747828	-0.23022	0.321239	0.0537329	0.747546	0.173908	0.212551	-0.0542717	0.937077	-0.244254	0.382425	-0.120175	0.315942
P27816	Microtubule-associated protein 4	0.117328	0.388648	0.12904	0.354876	0.011712	0.849106	0.122012	0.264591	0.180629	0.0930004	-0.191133	0.187889	0.0648511	0.672048	-0.058617	0.549225
Q9NYB0	Telomeric repeat-binding factor 2-interacting protein 1	-0.10344	0.388791	-0.197268	0.0756035	-0.0938277	0.584774	-0.140971	0.18547	0.130768	0.215173	-0.219058	0.0890125	-0.300403	0.00637798	-0.27174	0.000978826
Q06124	Tyrosine-protein phosphatase non-receptor type 11	-0.320434	0.388892	0.0399584	0.917554	0.360392	0.443656	-0.104198	0.684158	0.0992781	0.461102	-0.328542	0.305521	-0.131066	0.663272	-0.203477	0.40442
Q9H0U9	Testis-specific Y-encoded-like protein 1	0.112502	0.388977	-0.172734	0.104891	-0.285236	0.107913	-0.00159239	0.988339	0.283682	0.0150747	-0.0369122	0.446693	-0.557733	0.0606693	-0.285274	0.0179931
P41229	Lysine-specific demethylase 5C	0.0983824	0.389035	0.226127	#DIV/0!	0.127744	#DIV/0!	0.123931	0.285198	0.210888	0.140288	-0.000708935	0.276512	-0.0965572	#DIV/0!	-0.0869564	0.392161
Q13882	Protein-tyrosine kinase 6	0.190574	0.389308	-0.451732	0.118046	-0.642306	0.0810055	-0.0663484	0.752996	-0.279408	0.175882	0.44806	0.168924	-0.0230821	0.953091	0.21306	0.34683
P38919	Eukaryotic initiation factor 4A-III	0.169295	0.389327	-0.124152	0.498447	-0.293446	0.302323	0.0519159	0.746267	0.449495	0.00343947	-0.247804	0.0869237	-0.681448	0.000272162	-0.397579	0.00847319
Q16762	Thiosulfate sulfurtransferase	0.16587	0.389332	0.274711	0.155062	0.108841	0.936417	0.209406	0.19898	0.177243	0.248744	0.027761	0.402758	0.0864176	0.482729	0.0321635	0.79168
Q10570	Cleavage and polyadenylation specificity factor subunit 1	-0.315446	0.38944	-0.29437	0.506782	0.021076	0.763546	-0.307015	0.372525	-0.176701	0.570784	-0.0659472	0.472729	-0.281131	0.31419	-0.130314	0.484475
Q99426	Tubulin-folding cofactor B	0.125509	0.389719	-0.000695757	0.996938	-0.126205	0.571189	0.075027	0.536545	0.227699	0.0256132	-0.0686716	0.620412	-0.269794	0.171721	-0.152672	0.156423
P55263	Adenosine kinase	0.10725	0.389865	-0.0989572	#DIV/0!	-0.206207	#DIV/0!	0.0660084	0.529326	0.179013	0.365042	0.19036	0.478817	-0.540093	#DIV/0!	-0.113005	0.578307
P52907	F-actin-capping protein subunit alpha-1	0.161042	0.389904	-0.142571	0.573182	-0.303613	0.465723	0.0395966	0.805236	0.320361	0.0159613	-0.075937	0.243152	-0.499127	0.137458	-0.280764	0.0795681
P16989	Y-box-binding protein 3	0.17354	0.390447	0.127976	0.805699	-0.0455637	0.849049	0.155314	0.515629	-0.225174	0.172864	0.365046	0.0362213	0.393082	0.363309	0.380489	0.0798872
Q9Y5Z4	Heme-binding protein 2	-0.355406	0.390475	0.159348	0.727763	0.514754	0.38664	-0.149505	0.654628	-0.405137	0.20381	0.320989	0.330165	0.475329	0.311929	0.255633	0.455676
Q16816	Phosphorylase b kinase gamma catalytic chain, skeletal muscle/heart isoform	-0.41131	0.390596	0.0511722	0.941219	0.462482	0.695992	-0.226317	0.589269	-0.613856	0.112053	-0.0317501	0.634593	0.893302	0.145062	0.387539	0.357021
Q93074	Mediator of RNA polymerase II transcription subunit 12	-0.15066	0.391051	-0.267953	#DIV/0!	-0.117292	#DIV/0!	-0.174119	0.293765	0.0681862	0.784231	-0.0860796	0.909047	-0.468906	#DIV/0!	-0.242305	0.317554
Q96AX1	Vacuolar protein sorting-associated protein 33A	0.162312	0.391281	-0.108729	0.647207	-0.271041	0.288761	0.0538958	0.73262	0.416747	0.00156444	-0.17546	0.268014	-0.631133	0.0270462	-0.362851	0.0199837
Q9UHV9	Prefoldin subunit 2	0.154039	0.391589	-0.0201704	0.939298	-0.174209	0.675013	0.0843552	0.621022	0.184815	0.225229	0.0947802	0.801988	-0.250726	0.48038	-0.10046	0.451813
Q92820	Gamma-glutamyl hydrolase	0.326828	0.391778	0.230967	0.47137	-0.0958607	0.882904	0.288484	0.276971	0.145094	0.459882	0.356905	0.599913	-0.0566408	0.86041	0.14339	0.571356
P0DMM9	Sulfotransferase 1A3	-0.185267	0.391899	-0.139119	0.450915	0.0461478	0.803252	-0.157579	0.351712	-0.189878	0.331921	0.024532	0.812387	0.256721	0.0124586	0.0322993	0.823297
P62851	40S ribosomal protein S25	0.140104	0.391935	0.0163695	0.932861	-0.123735	0.553638	0.0906105	0.537492	0.11139	0.442628	0.14858	0.259324	-0.125174	0.679505	-0.0207795	0.860419
P50897	Palmitoyl-protein thioesterase 1	-0.146141	0.391983	0.059869	#DIV/0!	0.20601	#DIV/0!	-0.104939	0.490116	0.357521	0.279668	-0.160927	0.985938	-0.640387	#DIV/0!	-0.46246	0.182103
Q9BT23	LIM domain-containing protein 2	0.648173	0.392098	0.366161	0.698925	-0.282012	0.777626	0.478966	0.445455	1.83182	0.00622585	-0.976624	0.439843	-1.64453	0.157833	-1.35285	0.0434619
Q8TBK6	Zinc finger CCHC domain-containing protein 10	0.172262	0.392322	0.150512	#DIV/0!	-0.0217503	#DIV/0!	0.167912	0.329629	0.303492	0.0557043	-0.238012	0.53126	-0.0461981	#DIV/0!	-0.13558	0.354212
Q16656	Nuclear respiratory factor 1	-0.265328	0.392618	-0.228674	0.0414676	0.0366549	0.884233	-0.243335	0.0333015	-0.0994449	0.375928	-0.0219751	0.246299	-0.286571	0.252009	-0.143891	0.230186
O43583	Density-regulated protein	0.139787	0.392685	-0.118766	0.478373	-0.258552	0.297958	0.0363658	0.774461	0.362368	0.00100665	-0.218683	0.0741654	-0.519995	0.0100903	-0.326002	0.0161591
Q92520	Protein FAM3C	-0.240111	0.393023	0.0129882	0.871126	0.253099	0.395588	-0.0882514	0.456613	0.0152349	0.925863	-0.082004	0.709778	-0.0880684	0.789691	-0.103486	0.544689
P36405	ADP-ribosylation factor-like protein 3	-0.116121	0.393331	0.150721	0.44709	0.266843	0.164219	-0.00938437	0.947004	0.175118	0.250623	-0.118673	0.429182	-0.151655	0.455898	-0.184502	0.150213
Q969S9	Ribosome-releasing factor 2, mitochondrial	0.124153	0.393434	0.067515	0.591641	-0.0566383	0.809665	0.101498	0.312754	-0.0916639	0.170358	0.271481	0.106769	0.148748	0.288183	0.193162	0.0560502
P18859	ATP synthase-coupling factor 6, mitochondrial	-0.236611	0.393494	0.0335705	0.948708	0.270181	0.709197	-0.128538	0.650903	-0.381073	0.0948486	0.0469648	0.48939	0.48285	0.230191	0.252535	0.276137
Q8IUI8	Cytokine receptor-like factor 3	-0.0836949	0.393524	0.246558	0.23416	0.330253	0.152069	0.114457	0.44921	0.379312	0.0380151	-0.323534	0.182831	-0.176519	0.293452	-0.264855	0.157305
P50990	T-complex protein 1 subunit theta	0.104659	0.394474	-0.0883933	0.598499	-0.193053	0.271891	0.0274384	0.805726	0.378869	0.000396981	-0.244497	0.0302656	-0.521271	0.0148745	-0.351431	0.00143041
P24534	Elongation factor 1-beta	0.235094	0.394515	-0.206353	0.541801	-0.441447	0.414245	0.0585153	0.794055	0.329418	0.0410891	-0.0202022	0.423052	-0.674747	0.0621631	-0.270903	0.208523
P01911	HLA class II histocompatibility antigen, DRB1 beta chain	0.508093	0.394518	1.65682	#DIV/0!	1.14873	#DIV/0!	0.737838	0.183268	1.00842	0.307768	0.918847	0.0734138	-0.770773	#DIV/0!	-0.270581	0.784953
P06396	Gelsolin	-0.09059	0.394612	0.207621	0.269981	0.298211	0.127264	0.0286945	0.788818	0.0247579	0.743485	-0.15688	0.248646	0.25156	0.231845	0.00393668	0.969124
Q9NR28	Diablo IAP-binding mitochondrial protein	0.101186	0.394804	-0.0130214	0.936936	-0.114207	0.426365	0.0555027	0.593844	0.183363	0.0990547	-0.0943317	0.596162	-0.310936	0.176194	-0.12786	0.260313
P53004	Biliverdin reductase A	0.130867	0.394989	-0.0346843	0.822819	-0.165551	0.565027	0.0646462	0.605522	0.40868	0.00141961	-0.187798	0.0637828	-0.565074	0.0719066	-0.344034	0.00507516
P13647	Keratin, type II cytoskeletal 5	0.264587	0.39521	-0.614527	0.0984402	-0.879115	0.0479804	-0.0870587	0.779294	-0.495351	0.0900405	0.803414	0.0166528	-0.142793	0.75248	0.408292	0.128969
O94826	Mitochondrial import receptor subunit TOM70	0.13906	0.395258	-0.0889904	0.609704	-0.228051	0.291145	0.0478399	0.729795	0.151346	0.256363	0.0133009	0.893117	-0.403214	0.0314557	-0.103506	0.416952
P56211	cAMP-regulated phosphoprotein 19	-0.232848	0.395408	-0.263324	0.311863	-0.0304767	0.825849	-0.251133	0.332678	-0.0701337	0.797268	-0.107431	0.357089	0.0267752	0.667099	-0.181	0.238854
P53609	Geranylgeranyl transferase type-1 subunit beta	-0.144845	0.395742	-0.154184	0.443783	-0.00933901	0.684812	-0.148581	0.291282	-0.0101868	0.939984	0.0209961	0.40435	-0.197207	0.445653	-0.138394	0.305307
O60306	RNA helicase aquarius	0.131228	0.39578	-0.0618223	0.722932	-0.19305	0.537377	0.0540078	0.639183	0.219202	0.012296	-0.114059	0.204941	-0.295022	0.0552137	-0.165194	0.184369
P46779	60S ribosomal protein L28	0.197991	0.396169	-0.14359	0.392759	-0.34158	0.221425	0.0613585	0.743589	0.495352	0.0108619	-0.213165	0.13873	-0.777872	0.0212975	-0.433994	0.0131046
Q9BZE1	39S ribosomal protein L37, mitochondrial	-0.127171	0.396432	0.196103	0.544119	0.323273	0.290514	0.00213868	0.990407	-0.149865	0.345257	0.0749422	0.477558	0.424555	0.287644	0.152003	0.307142
Q8NCN5	Pyruvate dehydrogenase phosphatase regulatory subunit, mitochondrial	0.156624	0.396443	-0.120402	0.595792	-0.277026	0.381769	0.0458135	0.772435	0.281277	0.0724551	-0.0472905	0.539649	-0.641484	0.0362507	-0.235464	0.149504
O00231	26S proteasome non-ATPase regulatory subunit 11	0.0790928	0.396479	0.0759962	0.525818	-0.0030966	0.873536	0.0778542	0.327741	0.220905	0.00445023	-0.123808	0.0314255	-0.130512	0.350263	-0.143051	0.047055
Q2M2I8	AP2-associated protein kinase 1	0.198247	0.39671	-0.206984	0.361316	-0.405231	0.212734	0.0361545	0.842175	0.386402	0.0162972	-0.113634	0.261565	-0.701792	0.00871943	-0.350248	0.0699727
O75347	Tubulin-specific chaperone A	-0.140854	0.39693	0.070715	0.651087	0.211569	0.257511	-0.0562266	0.707246	0.106388	0.496306	-0.103007	0.363077	-0.0911441	0.624004	-0.162614	0.166929
Q02383	Semenogelin-2	-0.0969647	0.396987	0.0369778	0.753706	0.133943	0.36293	-0.0165992	0.82925	0.381586	0.238217	-0.662599	0.52297	-0.0777404	0.844812	-0.398185	0.225972
Q15773	Myeloid leukemia factor 2	-0.197103	0.396999	0.0448461	0.855561	0.24195	0.493516	-0.100324	0.568272	-0.599231	0.00533239	0.413741	0.0689401	0.878122	0.0330544	0.498908	0.0309747
Q8N3U4	Cohesin subunit SA-2	0.247157	0.397198	-0.235927	0.573666	-0.483084	0.371673	0.0539231	0.829857	0.548484	0.00341031	-0.36079	0.168743	-0.853012	0.0549309	-0.494561	0.0502673
Q9BZ67	FERM domain-containing protein 8	0.0574633	0.397697	0.0426043	0.505481	-0.014859	0.916045	0.0515197	0.382938	0.163491	0.0421985	0.0231071	0.773793	-0.216597	0.127307	-0.111971	0.097239
Q06265	Exosome complex component RRP45	0.127735	0.397705	0.0714259	0.699989	-0.0563088	0.708997	0.105211	0.45724	0.410075	0.00744274	-0.295241	0.00607915	-0.360974	0.0990081	-0.304864	0.00431271
Q9NYL4	Peptidyl-prolyl cis-trans isomerase FKBP11	-0.451844	0.397766	0.477463	0.435331	0.929308	0.12909	0.10574	0.847631	0.592054	0.393464	-0.732276	0.620459	-0.882143	0.23855	-0.486314	0.436988
O94979	Protein transport protein Sec31A	0.161709	0.397788	0.026889	0.941743	-0.13482	0.671002	0.107781	0.568396	0.531387	0.00691891	-0.319724	0.303135	-0.659473	0.0353954	-0.423606	0.0471424
O60508	Pre-mRNA-processing factor 17	0.0357729	0.398231	-0.129643	0.356775	-0.165416	0.266918	-0.0634768	0.461641	0.158747	0.0241413	-0.122063	0.781882	-0.268152	0.230343	-0.222224	0.0358868
Q9Y383	Putative RNA-binding protein Luc7-like 2	0.21422	0.398467	-0.323386	0.274487	-0.537606	0.220179	-0.000822496	0.996874	0.459347	0.00356162	-0.227034	0.222123	-0.928622	0.0130128	-0.46017	0.0317989
Q9UQ88	Cyclin-dependent kinase 11A	0.215208	0.399007	-0.122824	0.707004	-0.338031	0.424521	0.0799951	0.702293	0.583187	0.00146917	-0.358243	0.0719835	-0.857544	0.037734	-0.503192	0.0231905
Q6ZVM7	TOM1-like protein 2	0.0974838	0.399367	-0.176141	0.0974848	-0.273625	0.110536	-0.0119662	0.900048	-0.334437	0.00355371	0.503648	0.013313	0.148676	0.589736	0.322471	0.00937316
P61769	Beta-2-microglobulin	0.30969	0.399402	-0.753192	0.251639	-1.06288	0.14839	-0.115463	0.772253	0.766275	0.0290059	-0.541263	0.0655859	-1.36667	0.0339088	-0.881738	0.0213717
Q9UMS4	Pre-mRNA-processing factor 19	0.299855	0.399496	-0.276003	0.525163	-0.575858	0.396971	0.0695121	0.801522	0.685586	0.000801945	-0.481632	0.0904154	-1.05454	0.0204561	-0.616074	0.0432316
Q9H270	Vacuolar protein sorting-associated protein 11 homolog	0.140282	0.399754	0.0836322	0.74288	-0.0566495	0.772559	0.117622	0.419249	0.417566	0.000947047	-0.307404	0.0905648	-0.363383	0.149127	-0.299944	0.0326682
Q8WWP7	GTPase IMAP family member 1	-0.157985	0.40001	-0.0347399	0.801449	0.123245	0.938833	-0.108687	0.417385	0.0703681	0.491901	-0.140967	0.834393	-0.221876	0.160259	-0.179055	0.135771
O60449	Lymphocyte antigen 75	0.27897	0.400688	-0.304711	#DIV/0!	-0.583681	#DIV/0!	0.162234	0.571397	0.208008	0.178948	0.155771	0.688453	-0.597528	#DIV/0!	-0.0457743	0.862527
Q13077	TNF receptor-associated factor 1	0.404484	0.400729	-0.298681	#DIV/0!	-0.703165	#DIV/0!	0.263851	0.551692	0.864999	0.0348974	-0.654001	0.646187	-0.970195	#DIV/0!	-0.601148	0.112912
Q9NX40	OCIA domain-containing protein 1	0.131404	0.400761	-0.197149	0.304716	-0.328553	0.0980597	-0.065728	0.702098	0.221239	0.235921	-0.18793	0.23444	-0.539752	0.215234	-0.286967	0.103372
O43290	U4/U6.U5 tri-snRNP-associated protein 1	0.212439	0.40078	-0.158445	0.760368	-0.370884	0.558492	0.0640854	0.794366	0.567445	0.00162464	-0.410109	0.0936311	-0.841372	0.155868	-0.50336	0.0644995
O14929	Histone acetyltransferase type B catalytic subunit	0.229363	0.400808	-0.441748	0.140939	-0.671111	0.123723	-0.0390812	0.867854	0.372007	0.0316623	-0.168104	0.0948383	-0.808252	0.0165272	-0.411088	0.0645305
P30419	Glycylpeptide N-tetradecanoyltransferase 1	0.117884	0.400845	-0.00782655	0.959526	-0.125711	0.541491	0.0675999	0.557049	0.504551	0.00035224	-0.342398	0.0625474	-0.572277	0.0758297	-0.436951	0.00148219
Q5T0N5	Formin-binding protein 1-like	-0.292885	0.401017	0.0320509	0.875177	0.324936	0.364419	-0.0979236	0.581219	0.0423126	0.792881	-0.300653	0.519907	-0.185194	0.791369	-0.140236	0.472243
Q8IX12	Cell division cycle and apoptosis regulator protein 1	0.191884	0.401854	-0.263411	0.309291	-0.455294	0.249072	0.00976594	0.956067	0.432986	0.000973923	-0.279248	0.124136	-0.79762	0.0114141	-0.42322	0.0334444
Q9NXH8	Torsin-4A	0.134217	0.4021	-0.0366117	0.837384	-0.170828	0.2951	0.0317196	0.838172	0.422167	0.0425444	-0.175683	0.841864	-0.51376	0.224946	-0.390447	0.0290599
Q9NZZ3	Charged multivesicular body protein 5	0.115711	0.402215	0.0677759	0.627956	-0.0479348	0.359769	0.0965368	0.453311	0.23193	0.0805325	-0.0728569	0.749046	-0.267252	0.066884	-0.135393	0.0490809
Q07954	Prolow-density lipoprotein receptor-related protein 1	-0.133682	0.403657	0.11321	0.354008	0.246892	0.0291041	-0.0349252	0.789813	-0.246098	0.0598247	0.21835	0.493154	0.343569	0.0112505	0.211173	0.0703843
P43307	Translocon-associated protein subunit alpha	-0.168819	0.403667	0.0244862	0.949801	0.193305	0.618188	-0.0914968	0.668828	0.508896	0.0536308	-0.314186	0.236653	-0.775861	0.0430454	-0.600393	0.0236519
Q14738	Serine/threonine-protein phosphatase 2A 56 kDa regulatory subunit delta isoform	0.0762796	0.40377	0.0586053	0.631472	-0.0176743	0.628907	0.0692099	0.33224	0.144487	0.00912661	-0.0615859	0.888431	-0.0895423	0.532762	-0.0752773	0.300417
Q9Y6C9	Mitochondrial carrier homolog 2	0.186877	0.40423	0.00336526	0.987646	-0.183512	0.188271	0.113472	0.552605	0.300751	0.137532	-0.0535718	0.676207	-0.525888	0.0895361	-0.187278	0.257718
Q13618	Cullin-3	0.0799655	0.404317	0.062429	0.703854	-0.0175365	0.931143	0.0729509	0.430188	0.0770212	0.296446	0.0186065	0.874588	-0.0515727	0.615096	-0.00407039	0.955556
Q9UGV2	Protein NDRG3	-0.141363	0.405098	-0.00518647	0.978339	0.136176	0.533054	-0.059657	0.648079	-0.180667	0.251564	0.104525	0.528656	0.229388	0.134566	0.12101	0.467337
Q04695	Keratin, type I cytoskeletal 17	0.460579	0.405171	-1.18961	0.0220664	-1.65019	0.0151261	-0.199495	0.71188	-0.060773	0.89878	0.472419	0.295783	-0.762768	0.283868	-0.138722	0.749379
Q15056	Eukaryotic translation initiation factor 4H	0.100989	0.405195	-0.105129	0.494973	-0.206118	0.253327	0.0185416	0.871067	0.0902668	0.424527	0.123873	0.223543	-0.271393	0.264064	-0.0717252	0.471791
O43395	U4/U6 small nuclear ribonucleoprotein Prp3	0.213172	0.405695	-0.169866	0.503051	-0.383038	0.386301	0.0599567	0.752712	0.484991	0.00101401	-0.268008	0.101007	-0.767493	0.0158028	-0.425035	0.0370979
Q4V9L6	Transmembrane protein 119	-0.48504	0.405713	0.696589	0.389918	1.18163	0.201935	0.223938	0.703744	-0.341674	0.387119	-0.179888	0.698596	1.34139	0.326271	0.565612	0.299218
Q92530	Proteasome inhibitor PI31 subunit	-0.15955	0.40575	-0.611974	#DIV/0!	-0.452424	#DIV/0!	-0.250035	0.2267	-0.440171	0.0503529	0.460675	0.100866	-0.351858	#DIV/0!	0.190136	0.298013
Q96H79	Zinc finger CCCH-type antiviral protein 1-like	0.176348	0.406152	-0.185955	0.403799	-0.362304	0.115627	0.031427	0.851263	0.300439	0.046827	-0.220921	0.655022	-0.517968	0.081651	-0.269012	0.135065
O94855	Protein transport protein Sec24D	0.152752	0.406171	0.400095	0.370922	0.247342	0.643845	0.251689	0.235937	0.608507	0.00462459	-0.437233	0.232164	-0.294145	0.418556	-0.356817	0.106207
Q53F19	Nuclear cap-binding protein subunit 3	0.137127	0.406531	-0.117291	0.483153	-0.254418	0.253386	0.0353601	0.785139	0.372169	0.00489744	-0.153569	0.13796	-0.560284	0.000632603	-0.336809	0.0223236
Q92541	RNA polymerase-associated protein RTF1 homolog	0.199801	0.406549	-0.219876	0.482924	-0.419677	0.3286	0.0319301	0.872751	0.515239	0.000386201	-0.331275	0.109337	-0.756007	0.0355218	-0.483309	0.0184567
Q5VYK3	Proteasome adapter and scaffold protein ECM29	0.118678	0.406785	-0.149889	0.264758	-0.268567	0.0979899	0.0112513	0.925393	0.0636827	0.576858	0.0365756	0.379632	-0.291488	0.183262	-0.0524314	0.646396
Q13630	GDP-L-fucose synthase	-0.219385	0.407301	0.253937	0.606834	0.473322	0.30955	-0.0300558	0.917776	0.140203	0.654045	-0.0821252	0.782278	-0.0992607	0.864932	-0.170259	0.55492
O60684	Importin subunit alpha-7	-0.259518	0.40732	-0.319131	0.151598	-0.0596129	0.831155	-0.295286	0.0433196	0.0266794	0.672845	-0.246359	0.22099	-0.363976	0.239997	-0.321966	0.032189
P04279	Semenogelin-1	0.533442	0.407989	0.874607	0.274204	0.341165	0.492915	0.669908	0.31108	1.24475	0.158567	-0.520597	0.514362	-0.770504	0.462593	-0.574837	0.38097
Q5TFE4	5'-nucleotidase domain-containing protein 1	0.127262	0.408208	-0.11153	#DIV/0!	-0.238792	#DIV/0!	0.0795036	0.545171	0.360634	0.0190377	-0.0971401	0.968486	-0.608395	#DIV/0!	-0.28113	0.088708
Q92608	Dedicator of cytokinesis protein 2	0.241388	0.408225	-0.0402129	0.913469	-0.281601	0.387912	0.128748	0.625101	0.864998	0.00255208	-0.488048	0.0776713	-1.00226	0.00787076	-0.73625	0.00363348
P27708	CAD protein	0.180235	0.408803	-0.0814774	0.809882	-0.261712	0.4542	0.0755501	0.678375	0.279846	0.0171687	-0.0276088	0.936359	-0.44897	0.0805258	-0.204296	0.277101
P61619	Protein transport protein Sec61 subunit alpha isoform 1	0.249902	0.409898	-0.0800322	0.859005	-0.329935	0.516314	0.117929	0.657051	0.588972	0.0118476	-0.218651	0.512171	-0.946608	0.0467028	-0.471044	0.0789735
Q9UJU6	Drebrin-like protein	0.138702	0.410123	-0.160329	0.398815	-0.299031	0.19814	0.0190892	0.890699	0.318576	0.00471451	-0.14313	0.221655	-0.519613	0.0322204	-0.299487	0.0269423
O95232	Luc7-like protein 3	0.26447	0.410183	-0.278566	0.52308	-0.543037	0.389423	0.0472556	0.858337	0.582454	0.00108791	-0.367205	0.17887	-0.948679	0.0554542	-0.535199	0.048734
Q6UWY5	Olfactomedin-like protein 1	-0.388914	0.410304	0.0212495	0.966915	0.410163	0.181085	-0.224848	0.582764	-1.1291	0.00749557	0.863812	0.0373626	1.34805	0.0914594	0.904255	0.00955366
P12931	Proto-oncogene tyrosine-protein kinase Src	0.154654	0.4104	0.156221	0.589138	0.00156698	0.91739	0.155281	0.323851	0.301565	0.0181308	-0.0596259	0.529172	-0.22776	0.311474	-0.146284	0.360975
Q9BY67	Cell adhesion molecule 1	-0.287145	0.410672	0.415808	0.334387	0.702952	0.150323	0.134627	0.703156	-0.238853	0.464213	-0.167005	0.724214	0.938441	0.419514	0.37348	0.278737
P20591	Interferon-induced GTP-binding protein Mx1	0.391502	0.410821	-0.27107	0.453494	-0.662572	0.121867	0.126473	0.736529	1.19293	0.00456929	-0.84893	0.0468787	-1.42011	0.0230622	-1.06646	0.00802097
Q92747	Actin-related protein 2/3 complex subunit 1A	0.121408	0.410874	-0.0792694	0.541385	-0.200678	0.267279	0.0411371	0.737295	-0.0693374	0.635821	0.183967	0.435504	0.0798392	0.791145	0.110474	0.420621
O94973	AP-2 complex subunit alpha-2	0.236071	0.410932	-0.126369	0.677631	-0.36244	0.393844	0.0910949	0.699447	0.439667	0.0252742	-0.169131	0.300955	-0.667604	0.0736541	-0.348572	0.0769888
P28799	Progranulin	-0.208556	0.411184	0.168378	0.600397	0.376934	0.200784	-0.0577821	0.822175	0.16372	0.558576	-0.159679	0.0869411	0.0448347	0.85764	-0.221502	0.273314
P11586	C-1-tetrahydrofolate synthase, cytoplasmic	0.110246	0.411398	-0.0663635	0.679682	-0.176609	0.242492	0.039602	0.710034	0.362429	0.00022241	-0.266186	0.0166053	-0.440303	0.00911471	-0.322827	0.00709863
P04181	Ornithine aminotransferase, mitochondrial	0.280682	0.411833	-0.102259	0.780459	-0.382941	0.380958	0.127506	0.659791	0.671089	0.0537516	-0.300747	0.247527	-1.10667	0.0550484	-0.543584	0.0971177
Q9BTT0	Acidic leucine-rich nuclear phosphoprotein 32 family member E	-0.217427	0.412092	0.0262185	0.926586	0.243645	0.549742	-0.119969	0.574858	0.481868	0.011617	-0.550827	0.145004	-0.548119	0.0842741	-0.601837	0.00408104
Q99797	Mitochondrial intermediate peptidase	0.110733	0.412147	0.0570978	0.671972	-0.0536348	0.723516	0.0892787	0.455274	0.135654	0.36161	-0.0466523	0.679787	-0.222457	0.0954083	-0.0463754	0.701488
P19957	Elafin	0.344538	0.412362	-0.404767	0.207937	-0.749305	0.0470566	0.0448162	0.896648	0.0370837	0.927723	0.521852	0.305004	-0.472374	0.50336	0.00773253	0.984369
O75533	Splicing factor 3B subunit 1	0.17067	0.41238	-0.274529	0.327387	-0.445199	0.278249	-0.00740953	0.965489	0.390285	0.000348703	-0.242173	0.120402	-0.726469	0.0199289	-0.397694	0.0333064
Q16774	Guanylate kinase	0.263741	0.413793	-0.349688	0.428458	-0.613429	0.298646	0.0183691	0.947056	-0.233369	0.292917	0.465325	0.0732602	-0.190243	0.579043	0.251738	0.376852
P13796	Plastin-2	0.190528	0.414196	0.0373287	0.921575	-0.1532	0.665987	0.129248	0.580599	0.868605	0.00142034	-0.526823	0.093917	-0.952035	0.000951088	-0.739356	0.00194129
P01742	Immunoglobulin heavy variable 1-69	0.383449	0.414365	0.48697	0.377312	0.103522	0.630733	0.424857	0.241004	0.0922855	0.794082	0.44586	0.407329	0.530395	0.0441692	0.332572	0.411275
Q9H1E3	Nuclear ubiquitous casein and cyclin-dependent kinase substrate 1	0.208212	0.414456	-0.118268	0.505915	-0.32648	0.379018	0.0776198	0.692008	0.215903	0.212596	0.0875734	0.93473	-0.575654	0.0194768	-0.138283	0.401519
O95396	Adenylyltransferase and sulfurtransferase MOCS3	-0.0665704	0.41516	0.0731464	0.44802	0.139717	0.115902	-0.0106837	0.895285	0.139578	0.209101	-0.125654	0.317955	-0.0895829	0.201911	-0.150262	0.119345
P11169	Solute carrier family 2, facilitated glucose transporter member 3	0.157783	0.41538	0.0596867	0.679977	-0.0980959	0.399922	0.118544	0.420404	0.676216	0.00764137	-0.491375	0.259784	-0.732731	0.01302	-0.557671	0.0204917
Q15113	Procollagen C-endopeptidase enhancer 1	-0.300935	0.415538	0.528459	0.368624	0.829394	0.106191	0.0308224	0.933349	-0.430451	0.150553	0.170834	0.87509	0.963999	0.0658096	0.461273	0.144982
Q92665	28S ribosomal protein S31, mitochondrial	0.128264	0.415574	0.21252	#DIV/0!	0.0842563	#DIV/0!	0.145115	0.26843	0.242279	0.0315337	-0.0986175	0.216712	-0.0451568	#DIV/0!	-0.097164	0.435098
Q9BW85	Splicing factor YJU2	0.10235	0.415851	-0.194209	#DIV/0!	-0.296559	#DIV/0!	0.0430383	0.731916	0.0707461	0.518821	0.0014843	0.836123	-0.234835	#DIV/0!	-0.0277078	0.806843
Q8NC56	LEM domain-containing protein 2	0.145164	0.415863	-0.0460193	0.907472	-0.191183	0.577634	0.0686906	0.725838	0.276638	0.0774454	-0.117316	0.622722	-0.398766	0.209522	-0.207947	0.243991
Q5T0D9	Tumor protein p63-regulated gene 1-like protein	0.158138	0.415977	-0.136515	0.42427	-0.294653	0.307642	0.0402766	0.792973	-0.0895868	0.577478	0.427995	0.110478	-0.0570477	0.840685	0.129863	0.438918
P50416	Carnitine O-palmitoyltransferase 1, liver isoform	0.212272	0.416102	-0.0987157	0.776236	-0.310988	0.470644	0.0878769	0.692517	0.463557	0.0305808	-0.139658	0.224508	-0.838842	0.00558965	-0.37568	0.10735
Q9Y2J2	Band 4.1-like protein 3	-0.159517	0.416612	0.111074	0.741804	0.270591	0.443555	-0.0512803	0.776398	0.0473471	0.695896	-0.0688574	0.640458	-0.0238588	0.935662	-0.0986274	0.562027
Q8TEX9	Importin-4	-0.180854	0.416837	0.127456	0.476612	0.308309	0.282324	-0.0575299	0.749767	0.0353145	0.815553	-0.180632	0.764883	0.148307	0.380436	-0.0928444	0.491664
P23610	40-kDa huntingtin-associated protein	0.0917754	0.416979	-0.156788	0.300623	-0.248564	0.130166	-0.00765013	0.947068	0.135654	0.317388	0.0222575	0.992542	-0.232852	0.384888	-0.143304	0.23163
Q06547	GA-binding protein subunit beta-1	-0.127908	0.417199	-0.288443	0.121276	-0.160535	0.320342	-0.192122	0.175518	0.109257	0.455529	-0.0798007	0.75256	-0.458393	0.064613	-0.301379	0.024555
Q99436	Proteasome subunit beta type-7	0.152764	0.417584	0.314766	0.334151	0.162002	0.586374	0.217565	0.243625	0.0953268	0.513852	0.0281992	0.928194	0.272446	0.49443	0.122238	0.37221
Q12789	General transcription factor 3C polypeptide 1	-0.0828516	0.41769	-0.118979	0.180325	-0.0361274	0.0964514	-0.0973026	0.290898	-0.0483184	0.616778	0.00898911	0.149695	-0.042966	0.283208	-0.0489842	0.408736
O00422	Histone deacetylase complex subunit SAP18	0.146629	0.417741	-0.251438	0.16676	-0.398066	0.139956	-0.0125978	0.935112	0.482884	0.00216536	-0.289573	0.00305105	-0.834772	0.0426745	-0.495482	0.00356925
P16298	Serine/threonine-protein phosphatase 2B catalytic subunit beta isoform	0.175495	0.417877	0.152416	0.493245	-0.0230791	0.56154	0.166263	0.335225	0.401577	0.010405	-0.165941	0.638374	-0.258935	0.0263903	-0.235313	0.096824
Q9UGM3	Deleted in malignant brain tumors 1 protein	-0.32298	0.41789	0.289372	0.549038	0.612352	0.116084	-0.0780393	0.837507	0.101495	0.818964	-0.635701	0.232824	0.447803	0.233626	-0.179534	0.635263
P51606	N-acylglucosamine 2-epimerase	-0.148962	0.41864	0.0322619	0.912818	0.181224	0.612422	-0.0764725	0.66924	0.276611	0.101933	-0.299811	0.123424	-0.285428	0.291827	-0.353084	0.0316518
Q9GZM8	Nuclear distribution protein nudE-like 1	0.235129	0.418727	0.263505	0.465604	0.0283757	0.900841	0.24648	0.256058	0.0507439	0.66855	0.258588	0.228124	0.170969	0.583378	0.195736	0.345642
Q9NRF9	DNA polymerase epsilon subunit 3	0.11634	0.419117	-0.0583096	0.680507	-0.174649	0.254889	0.0464801	0.720326	0.321305	0.0283965	-0.104774	0.173256	-0.425388	0.149581	-0.274825	0.0162324
Q9H3Z4	DnaJ homolog subfamily C member 5	0.11308	0.419722	-0.211544	#DIV/0!	-0.324625	#DIV/0!	0.0481553	0.712538	0.219358	0.109977	-0.0777733	0.786947	-0.459407	#DIV/0!	-0.171203	0.278032
Q00872	Myosin-binding protein C, slow-type	0.594507	0.419852	0.319186	0.752119	-0.275321	0.453947	0.484379	0.441281	-0.0470732	0.940803	-0.0719313	0.428098	1.05135	0.348859	0.531452	0.429463
Q8N335	Glycerol-3-phosphate dehydrogenase 1-like protein	-0.261474	0.420078	0.110545	0.7301	0.372019	0.642534	-0.112666	0.648376	-0.479873	0.0236144	0.149494	0.0448418	0.656545	0.137263	0.367207	0.134957
Q13200	26S proteasome non-ATPase regulatory subunit 2	0.108352	0.420229	0.0446818	0.750046	-0.0636706	0.569246	0.0828842	0.509387	0.370917	0.00841811	-0.222243	0.173484	-0.381913	0.0611738	-0.288033	0.000617463
[truncated: 3,531 more rows]
