# Supplementary material for: Biomarkers Correlating with the Development of Oral Squamous Cell Carcinoma from Leukoplakia
Source: Research Square preprint supplement (doi:10.21203/rs.3.rs-6688707/v1), 2025-07-10
Supplement: Supplementary file 2 [file f19ef0be1ff1142da9eb6ae9.xlsx]

## Sheet: All SD-leuko-ca vs leuko-nonca 
term ID	term description	observed gene count	background gene count	strength	signal	false discovery rate	matching proteins in your network (IDs)	matching proteins in your network (labels)
GO:0010467	Gene expression	58	2101	0.4	0.77	6.88e-07	9606.ENSP00000199814,9606.ENSP00000221265,9606.ENSP00000230340,9606.ENSP00000245544,9606.ENSP00000252486,9606.ENSP00000253039,9606.ENSP00000263205,9606.ENSP00000263239,9606.ENSP00000265164,9606.ENSP00000278618,9606.ENSP00000281701,9606.ENSP00000282486,9606.ENSP00000289371,9606.ENSP00000291552,9606.ENSP00000302768,9606.ENSP00000302886,9606.ENSP00000304408,9606.ENSP00000306320,9606.ENSP00000308541,…	RBM22,PAF1,BYSL,NUP85,APOE,EIF2S3,MED15,DDX18,CASP6,AASDHPPT,NVL,MBNL1,EIF5B,U2AF1,PAIP1,PA2G4,COL3A1,GON7,F2,HLTF,RPL38,NUP93,TRMT10C,RBBP6,METAP2,DRG1,EEF1G,PRPF4B,ZC3H15,SMARCA4,PES1,HP,F8,CTNNBL1,SYNCRIP,RPL5,RPL10A,ELP1,F10,NUP160,EIF3CL,RPL24,SNU13,ZNF638,TARS1,RBM17,EEF1D,EIF4G1,TRA2B,RRP1,RPS20,INTS4,RPLP0,ISCA2,NUP88,RPS5,CWC15,PQBP1
GO:0002181	Cytoplasmic translation	12	123	0.95	0.85	0.00023	9606.ENSP00000253039,9606.ENSP00000309830,9606.ENSP00000329715,9606.ENSP00000338788,9606.ENSP00000359345,9606.ENSP00000363018,9606.ENSP00000370258,9606.ENSP00000377640,9606.ENSP00000416255,9606.ENSP00000429374,9606.ENSP00000449328,9606.ENSP00000472985	EIF2S3,RPL38,DRG1,ZC3H15,RPL5,RPL10A,EIF3CL,RPL24,EIF4G1,RPS20,RPLP0,RPS5
GO:0051346	Negative regulation of hydrolase activity	18	354	0.66	0.65	0.00078	9606.ENSP00000215727,9606.ENSP00000226218,9606.ENSP00000227667,9606.ENSP00000232003,9606.ENSP00000245907,9606.ENSP00000246747,9606.ENSP00000256637,9606.ENSP00000278407,9606.ENSP00000323929,9606.ENSP00000332371,9606.ENSP00000333203,9606.ENSP00000356969,9606.ENSP00000377036,9606.ENSP00000386862,9606.ENSP00000416066,9606.ENSP00000450540,9606.ENSP00000493985,9606.ENSP00000497691	SERPIND1,VTN,APOC3,HRG,C3,ARL2,SORT1,SERPING1,A2M,COL7A1,SERPINA5,APOA2,PTPA,SH3BP4,SERPINA1,SERPINA3,KNG1,APLP2
GO:0042273	Ribosomal large subunit biogenesis	9	74	1.04	0.72	0.0012	9606.ENSP00000263239,9606.ENSP00000281701,9606.ENSP00000309830,9606.ENSP00000346725,9606.ENSP00000359345,9606.ENSP00000363018,9606.ENSP00000377640,9606.ENSP00000383949,9606.ENSP00000449328	DDX18,NVL,RPL38,PES1,RPL5,RPL10A,RPL24,SNU13,RPLP0
GO:0043086	Negative regulation of catalytic activity	26	771	0.49	0.52	0.0020	9606.ENSP00000215727,9606.ENSP00000226218,9606.ENSP00000227667,9606.ENSP00000232003,9606.ENSP00000245907,9606.ENSP00000246747,9606.ENSP00000252486,9606.ENSP00000256637,9606.ENSP00000278407,9606.ENSP00000323929,9606.ENSP00000332371,9606.ENSP00000333203,9606.ENSP00000348170,9606.ENSP00000350757,9606.ENSP00000356969,9606.ENSP00000359345,9606.ENSP00000369042,9606.ENSP00000377036,9606.ENSP00000386862,…	SERPIND1,VTN,APOC3,HRG,C3,ARL2,APOE,SORT1,SERPING1,A2M,COL7A1,SERPINA5,HP,GMFB,APOA2,RPL5,IPO7,PTPA,SH3BP4,ARRB1,SERPINA1,RPS20,SERPINA3,APOC2,KNG1,APLP2
GO:0051248	Negative regulation of protein metabolic process	31	1038	0.43	0.5	0.0020	9606.ENSP00000215727,9606.ENSP00000226218,9606.ENSP00000232003,9606.ENSP00000245907,9606.ENSP00000252486,9606.ENSP00000278407,9606.ENSP00000279387,9606.ENSP00000286428,9606.ENSP00000308541,9606.ENSP00000315130,9606.ENSP00000323929,9606.ENSP00000332371,9606.ENSP00000333203,9606.ENSP00000358635,9606.ENSP00000359345,9606.ENSP00000363827,9606.ENSP00000369042,9606.ENSP00000369677,9606.ENSP00000377036,…	SERPIND1,VTN,HRG,C3,APOE,SERPING1,PPP4C,VBP1,F2,CLU,A2M,COL7A1,SERPINA5,SYNCRIP,RPL5,HSPG2,IPO7,EMILIN1,PTPA,GIGYF2,MOV10,ARRB1,SERPINA1,EIF4G1,RPS20,SERPINA3,FKBP8,YTHDF3,DDX6,KNG1,APLP2
GO:0006953	Acute-phase response	7	42	1.18	0.69	0.0021	9606.ENSP00000278222,9606.ENSP00000308541,9606.ENSP00000323929,9606.ENSP00000348170,9606.ENSP00000353393,9606.ENSP00000416066,9606.ENSP00000450540	SAA4,F2,A2M,HP,F8,SERPINA1,SERPINA3
GO:0007596	Blood coagulation	12	173	0.8	0.62	0.0021	9606.ENSP00000215727,9606.ENSP00000232003,9606.ENSP00000278407,9606.ENSP00000301178,9606.ENSP00000304408,9606.ENSP00000308541,9606.ENSP00000308938,9606.ENSP00000353393,9606.ENSP00000364709,9606.ENSP00000378431,9606.ENSP00000416066,9606.ENSP00000493985	SERPIND1,HRG,SERPING1,AXL,COL3A1,F2,PLG,F8,F10,MMRN1,SERPINA1,KNG1
GO:0030195	Negative regulation of blood coagulation	7	46	1.14	0.67	0.0024	9606.ENSP00000226218,9606.ENSP00000232003,9606.ENSP00000252486,9606.ENSP00000278407,9606.ENSP00000308541,9606.ENSP00000308938,9606.ENSP00000493985	VTN,HRG,APOE,SERPING1,F2,PLG,KNG1
GO:0030193	Regulation of blood coagulation	8	70	1.02	0.65	0.0025	9606.ENSP00000226218,9606.ENSP00000232003,9606.ENSP00000252486,9606.ENSP00000278407,9606.ENSP00000308541,9606.ENSP00000308938,9606.ENSP00000369677,9606.ENSP00000493985	VTN,HRG,APOE,SERPING1,F2,PLG,EMILIN1,KNG1
GO:0061045	Negative regulation of wound healing	8	69	1.02	0.65	0.0025	9606.ENSP00000226218,9606.ENSP00000232003,9606.ENSP00000252486,9606.ENSP00000278407,9606.ENSP00000308541,9606.ENSP00000308938,9606.ENSP00000378431,9606.ENSP00000493985	VTN,HRG,APOE,SERPING1,F2,PLG,MMRN1,KNG1
GO:0006412	Translation	17	389	0.6	0.55	0.0026	9606.ENSP00000253039,9606.ENSP00000289371,9606.ENSP00000302768,9606.ENSP00000309830,9606.ENSP00000329715,9606.ENSP00000331901,9606.ENSP00000338788,9606.ENSP00000359345,9606.ENSP00000363018,9606.ENSP00000370258,9606.ENSP00000377640,9606.ENSP00000387710,9606.ENSP00000410059,9606.ENSP00000416255,9606.ENSP00000429374,9606.ENSP00000449328,9606.ENSP00000472985	EIF2S3,EIF5B,PAIP1,RPL38,DRG1,EEF1G,ZC3H15,RPL5,RPL10A,EIF3CL,RPL24,TARS1,EEF1D,EIF4G1,RPS20,RPLP0,RPS5
GO:0071840	Cellular component organization or biogenesis	94	5639	0.18	0.39	0.0028	9606.ENSP00000215957,9606.ENSP00000225964,9606.ENSP00000226218,9606.ENSP00000227667,9606.ENSP00000230340,9606.ENSP00000245046,9606.ENSP00000245544,9606.ENSP00000245907,9606.ENSP00000246747,9606.ENSP00000249014,9606.ENSP00000251588,9606.ENSP00000252486,9606.ENSP00000252999,9606.ENSP00000253039,9606.ENSP00000256637,9606.ENSP00000258341,9606.ENSP00000263205,9606.ENSP00000263239,9606.ENSP00000264828,…	MICALL1,COL1A1,VTN,APOC3,BYSL,EMC3,NUP85,C3,ARL2,CDC42EP1,CIAO3,APOE,LAMA5,EIF2S3,SORT1,LAMC1,MED15,DDX18,COL5A3,CASP6,EMC4,MFGE8,TIMM44,DYNC1LI1,NVL,RAB6B,SMC2,VBP1,COL1A2,MAEA,PA2G4,COL3A1,PLG,HLTF,RPL38,NUP93,CLU,NUP98,MVB12A,MRE11,PCM1,SERPINA5,SMC4,SMARCA4,GPX4,PES1,MINK1,COL6A6,COL18A1,RAB5B,SELENON,MTR,APOA2,RAB13,RPL5,COL5A1,RPL10A,COL5A2,COL15A1,COL4A1,ATAD3A,EMILIN1,CHD3,EIF3CL,KLC3,PTP…
GO:0030198	Extracellular matrix organization	14	278	0.66	0.55	0.0033	9606.ENSP00000225964,9606.ENSP00000226218,9606.ENSP00000258341,9606.ENSP00000264828,9606.ENSP00000297268,9606.ENSP00000304408,9606.ENSP00000308938,9606.ENSP00000351310,9606.ENSP00000352798,9606.ENSP00000360882,9606.ENSP00000364000,9606.ENSP00000364140,9606.ENSP00000364979,9606.ENSP00000369677	COL1A1,VTN,LAMC1,COL5A3,COL1A2,COL3A1,PLG,COL6A6,COL18A1,COL5A1,COL5A2,COL15A1,COL4A1,EMILIN1
GO:0043691	Reverse cholesterol transport	5	18	1.4	0.66	0.0033	9606.ENSP00000227667,9606.ENSP00000252486,9606.ENSP00000315130,9606.ENSP00000356969,9606.ENSP00000466775	APOC3,APOE,CLU,APOA2,APOC2
GO:0002526	Acute inflammatory response	8	80	0.96	0.61	0.0034	9606.ENSP00000278222,9606.ENSP00000308541,9606.ENSP00000323929,9606.ENSP00000348170,9606.ENSP00000353393,9606.ENSP00000356969,9606.ENSP00000416066,9606.ENSP00000450540	SAA4,F2,A2M,HP,F8,APOA2,SERPINA1,SERPINA3
GO:0006396	RNA processing	26	868	0.43	0.48	0.0034	9606.ENSP00000199814,9606.ENSP00000221265,9606.ENSP00000230340,9606.ENSP00000263239,9606.ENSP00000281701,9606.ENSP00000282486,9606.ENSP00000291552,9606.ENSP00000302886,9606.ENSP00000306320,9606.ENSP00000312356,9606.ENSP00000317872,9606.ENSP00000337194,9606.ENSP00000346725,9606.ENSP00000355050,9606.ENSP00000358635,9606.ENSP00000359345,9606.ENSP00000363018,9606.ENSP00000363779,9606.ENSP00000383949,…	RBM22,PAF1,BYSL,DDX18,NVL,MBNL1,U2AF1,PA2G4,GON7,TRMT10C,RBBP6,PRPF4B,PES1,CTNNBL1,SYNCRIP,RPL5,RPL10A,ELP1,SNU13,ZNF638,RBM17,TRA2B,RRP1,INTS4,CWC15,PQBP1
GO:0006952	Defense response	35	1394	0.36	0.45	0.0034	9606.ENSP00000216117,9606.ENSP00000232003,9606.ENSP00000245907,9606.ENSP00000259205,9606.ENSP00000278222,9606.ENSP00000278407,9606.ENSP00000301178,9606.ENSP00000308541,9606.ENSP00000312946,9606.ENSP00000315130,9606.ENSP00000323929,9606.ENSP00000327459,9606.ENSP00000341141,9606.ENSP00000348170,9606.ENSP00000353393,9606.ENSP00000356037,9606.ENSP00000356399,9606.ENSP00000356969,9606.ENSP00000357123,…	HMOX1,HRG,C3,IL36G,SAA4,SERPING1,AXL,F2,STAB1,CLU,A2M,APOBEC3B,SIGLEC1,HP,F8,C4BPA,CFH,APOA2,MNDA,SYNCRIP,HSPG2,HLA-C,ATAD3A,IPO7,SSC5D,G3BP1,TF,MOV10,SERPINA1,EIF4G1,SERPINA3,IGHD,TREX1,KNG1,PQBP1
GO:0050878	Regulation of body fluid levels	16	371	0.59	0.53	0.0034	9606.ENSP00000215727,9606.ENSP00000226218,9606.ENSP00000232003,9606.ENSP00000252486,9606.ENSP00000278407,9606.ENSP00000301178,9606.ENSP00000304408,9606.ENSP00000308541,9606.ENSP00000308938,9606.ENSP00000353393,9606.ENSP00000364709,9606.ENSP00000369677,9606.ENSP00000378431,9606.ENSP00000416066,9606.ENSP00000449328,9606.ENSP00000493985	SERPIND1,VTN,HRG,APOE,SERPING1,AXL,COL3A1,F2,PLG,F8,F10,EMILIN1,MMRN1,SERPINA1,RPLP0,KNG1
GO:0034248	Regulation of cellular amide metabolic process	19	516	0.52	0.5	0.0037	9606.ENSP00000252486,9606.ENSP00000253039,9606.ENSP00000289371,9606.ENSP00000302768,9606.ENSP00000302886,9606.ENSP00000309830,9606.ENSP00000312356,9606.ENSP00000315130,9606.ENSP00000331901,9606.ENSP00000358635,9606.ENSP00000359345,9606.ENSP00000363779,9606.ENSP00000370258,9606.ENSP00000387170,9606.ENSP00000399797,9606.ENSP00000410059,9606.ENSP00000416255,9606.ENSP00000478490,9606.ENSP00000478754	APOE,EIF2S3,EIF5B,PAIP1,PA2G4,RPL38,TRMT10C,CLU,EEF1G,SYNCRIP,RPL5,ELP1,EIF3CL,GIGYF2,MOV10,EEF1D,EIF4G1,YTHDF3,DDX6
GO:0042060	Wound healing	15	336	0.61	0.52	0.0040	9606.ENSP00000215727,9606.ENSP00000216117,9606.ENSP00000225964,9606.ENSP00000232003,9606.ENSP00000278407,9606.ENSP00000301178,9606.ENSP00000304408,9606.ENSP00000308541,9606.ENSP00000308938,9606.ENSP00000353393,9606.ENSP00000360882,9606.ENSP00000364709,9606.ENSP00000378431,9606.ENSP00000416066,9606.ENSP00000493985	SERPIND1,HMOX1,COL1A1,HRG,SERPING1,AXL,COL3A1,F2,PLG,F8,COL5A1,F10,MMRN1,SERPINA1,KNG1
GO:0042254	Ribosome biogenesis	14	299	0.63	0.52	0.0045	9606.ENSP00000230340,9606.ENSP00000263239,9606.ENSP00000281701,9606.ENSP00000302886,9606.ENSP00000309830,9606.ENSP00000346725,9606.ENSP00000359345,9606.ENSP00000363018,9606.ENSP00000377640,9606.ENSP00000383949,9606.ENSP00000417464,9606.ENSP00000449328,9606.ENSP00000458954,9606.ENSP00000472985	BYSL,DDX18,NVL,PA2G4,RPL38,PES1,RPL5,RPL10A,RPL24,SNU13,RRP1,RPLP0,NUP88,RPS5
GO:0030449	Regulation of complement activation	5	22	1.31	0.62	0.0046	9606.ENSP00000245907,9606.ENSP00000278407,9606.ENSP00000323929,9606.ENSP00000356037,9606.ENSP00000356399	C3,SERPING1,A2M,C4BPA,CFH
GO:0050790	Regulation of catalytic activity	49	2370	0.27	0.4	0.0052	9606.ENSP00000215727,9606.ENSP00000226218,9606.ENSP00000227667,9606.ENSP00000232003,9606.ENSP00000245907,9606.ENSP00000246747,9606.ENSP00000252486,9606.ENSP00000256637,9606.ENSP00000265164,9606.ENSP00000274813,9606.ENSP00000278407,9606.ENSP00000279387,9606.ENSP00000281701,9606.ENSP00000283195,9606.ENSP00000284031,9606.ENSP00000292782,9606.ENSP00000297785,9606.ENSP00000301178,9606.ENSP00000308541,…	SERPIND1,VTN,APOC3,HRG,C3,ARL2,APOE,SORT1,CASP6,MMUT,SERPING1,PPP4C,NVL,RANBP2,DDAH1,DCUN1D1,ALDH1A1,AXL,F2,CLU,A2M,FBN1,MRE11,COL7A1,SERPINA5,ZC3H15,NRDC,GIT2,HP,GMFB,SASH1,APOA2,RPL5,DDAH2,IPO7,PTPA,SH3BP4,RANBP1,ARRB1,EEF1D,SERPINA1,RPS20,ARFGAP2,PGAM5,SERPINA3,APOC2,TREX1,KNG1,APLP2
GO:0034381	Plasma lipoprotein particle clearance	5	24	1.28	0.58	0.0063	9606.ENSP00000216117,9606.ENSP00000227667,9606.ENSP00000252486,9606.ENSP00000356969,9606.ENSP00000466775	HMOX1,APOC3,APOE,APOA2,APOC2
GO:0008152	Metabolic process	119	7988	0.13	0.33	0.0073	9606.ENSP00000199814,9606.ENSP00000216117,9606.ENSP00000221265,9606.ENSP00000225519,9606.ENSP00000225964,9606.ENSP00000227667,9606.ENSP00000230340,9606.ENSP00000244137,9606.ENSP00000245544,9606.ENSP00000245907,9606.ENSP00000251588,9606.ENSP00000252486,9606.ENSP00000253039,9606.ENSP00000254770,9606.ENSP00000263205,9606.ENSP00000263239,9606.ENSP00000265164,9606.ENSP00000274813,9606.ENSP00000278618,…	RBM22,HMOX1,PAF1,SHPK,COL1A1,APOC3,BYSL,PEPD,NUP85,C3,CIAO3,APOE,EIF2S3,LANCL2,MED15,DDX18,CASP6,MMUT,AASDHPPT,PPP4C,NVL,MBNL1,RANBP2,DDAH1,EIF5B,U2AF1,FLAD1,DCUN1D1,PCYT1A,COL1A2,ALDH1A1,AXL,PAIP1,MAEA,PA2G4,COL3A1,GON7,ASL,F2,PLG,HLTF,PIGS,RPL38,NUP93,TRMT10C,CLU,NUP98,RBBP6,MVB12A,METAP2,FBN1,MRE11,APOBEC3B,DRG1,EEF1G,PDE2A,PRPF4B,ZC3H15,SMARCA4,GPX4,PES1,NRDC,MINK1,GIT2,HP,CDC16,GMFB,F8,CTNNB…
GO:0001568	Blood vessel development	18	505	0.51	0.45	0.0077	9606.ENSP00000216117,9606.ENSP00000225964,9606.ENSP00000230538,9606.ENSP00000232003,9606.ENSP00000252486,9606.ENSP00000268150,9606.ENSP00000297268,9606.ENSP00000303758,9606.ENSP00000304408,9606.ENSP00000308938,9606.ENSP00000334910,9606.ENSP00000352798,9606.ENSP00000360882,9606.ENSP00000363827,9606.ENSP00000364140,9606.ENSP00000364979,9606.ENSP00000428564,9606.ENSP00000486676	HMOX1,COL1A1,LAMA4,HRG,APOE,MFGE8,COL1A2,LUZP1,COL3A1,PLG,PDE2A,COL18A1,COL5A1,HSPG2,COL15A1,COL4A1,SEC24B,TREX1
GO:0006417	Regulation of translation	17	456	0.53	0.45	0.0077	9606.ENSP00000253039,9606.ENSP00000289371,9606.ENSP00000302768,9606.ENSP00000302886,9606.ENSP00000309830,9606.ENSP00000312356,9606.ENSP00000331901,9606.ENSP00000358635,9606.ENSP00000359345,9606.ENSP00000363779,9606.ENSP00000370258,9606.ENSP00000387170,9606.ENSP00000399797,9606.ENSP00000410059,9606.ENSP00000416255,9606.ENSP00000478490,9606.ENSP00000478754	EIF2S3,EIF5B,PAIP1,PA2G4,RPL38,TRMT10C,EEF1G,SYNCRIP,RPL5,ELP1,EIF3CL,GIGYF2,MOV10,EEF1D,EIF4G1,YTHDF3,DDX6
GO:0010951	Negative regulation of endopeptidase activity	12	240	0.66	0.47	0.0088	9606.ENSP00000215727,9606.ENSP00000226218,9606.ENSP00000232003,9606.ENSP00000245907,9606.ENSP00000278407,9606.ENSP00000323929,9606.ENSP00000332371,9606.ENSP00000333203,9606.ENSP00000416066,9606.ENSP00000450540,9606.ENSP00000493985,9606.ENSP00000497691	SERPIND1,VTN,HRG,C3,SERPING1,A2M,COL7A1,SERPINA5,SERPINA1,SERPINA3,KNG1,APLP2
GO:0033700	Phospholipid efflux	4	12	1.48	0.56	0.0088	9606.ENSP00000227667,9606.ENSP00000252486,9606.ENSP00000356969,9606.ENSP00000466775	APOC3,APOE,APOA2,APOC2
GO:0061041	Regulation of wound healing	9	130	0.8	0.5	0.0088	9606.ENSP00000226218,9606.ENSP00000232003,9606.ENSP00000252486,9606.ENSP00000278407,9606.ENSP00000308541,9606.ENSP00000308938,9606.ENSP00000369677,9606.ENSP00000378431,9606.ENSP00000493985	VTN,HRG,APOE,SERPING1,F2,PLG,EMILIN1,MMRN1,KNG1
GO:0071704	Organic substance metabolic process	113	7522	0.13	0.33	0.0093	9606.ENSP00000199814,9606.ENSP00000216117,9606.ENSP00000221265,9606.ENSP00000225519,9606.ENSP00000227667,9606.ENSP00000230340,9606.ENSP00000244137,9606.ENSP00000245544,9606.ENSP00000245907,9606.ENSP00000252486,9606.ENSP00000253039,9606.ENSP00000254770,9606.ENSP00000263205,9606.ENSP00000263239,9606.ENSP00000265164,9606.ENSP00000274813,9606.ENSP00000278618,9606.ENSP00000279387,9606.ENSP00000281701,…	RBM22,HMOX1,PAF1,SHPK,APOC3,BYSL,PEPD,NUP85,C3,APOE,EIF2S3,LANCL2,MED15,DDX18,CASP6,MMUT,AASDHPPT,PPP4C,NVL,MBNL1,RANBP2,DDAH1,EIF5B,U2AF1,FLAD1,DCUN1D1,PCYT1A,ALDH1A1,AXL,PAIP1,MAEA,PA2G4,COL3A1,GON7,ASL,F2,PLG,HLTF,PIGS,RPL38,NUP93,TRMT10C,CLU,NUP98,RBBP6,MVB12A,METAP2,FBN1,MRE11,APOBEC3B,DRG1,EEF1G,PDE2A,PRPF4B,ZC3H15,SMARCA4,GPX4,PES1,NRDC,MINK1,HP,CDC16,GMFB,F8,CTNNBL1,MTR,CFH,SASH1,APOA2,SY…
GO:0030194	Positive regulation of blood coagulation	5	28	1.21	0.53	0.0099	9606.ENSP00000226218,9606.ENSP00000232003,9606.ENSP00000308541,9606.ENSP00000308938,9606.ENSP00000369677	VTN,HRG,F2,PLG,EMILIN1
GO:0007155	Cell adhesion	26	965	0.39	0.4	0.0101	9606.ENSP00000226218,9606.ENSP00000230538,9606.ENSP00000249014,9606.ENSP00000252999,9606.ENSP00000258341,9606.ENSP00000264828,9606.ENSP00000268150,9606.ENSP00000271835,9606.ENSP00000300527,9606.ENSP00000301178,9606.ENSP00000302830,9606.ENSP00000304408,9606.ENSP00000312946,9606.ENSP00000325527,9606.ENSP00000332371,9606.ENSP00000341141,9606.ENSP00000351310,9606.ENSP00000352798,9606.ENSP00000355180,…	VTN,LAMA4,CDC42EP1,LAMA5,LAMC1,COL5A3,MFGE8,CRNN,COL6A2,AXL,MAEA,COL3A1,STAB1,FBN1,COL7A1,SIGLEC1,COL6A6,COL18A1,COL6A1,THBS2,THBS3,COL5A1,COL15A1,EMILIN1,MMRN1,FBLIM1
GO:0009987	Cellular process	188	14826	0.06	0.3	0.0101	9606.ENSP00000000233,9606.ENSP00000199814,9606.ENSP00000215957,9606.ENSP00000216117,9606.ENSP00000221265,9606.ENSP00000225519,9606.ENSP00000225964,9606.ENSP00000226218,9606.ENSP00000227667,9606.ENSP00000230340,9606.ENSP00000230538,9606.ENSP00000232003,9606.ENSP00000234256,9606.ENSP00000244137,9606.ENSP00000245046,9606.ENSP00000245544,9606.ENSP00000245907,9606.ENSP00000246747,9606.ENSP00000249014,…	ARF5,RBM22,MICALL1,HMOX1,PAF1,SHPK,COL1A1,VTN,APOC3,BYSL,LAMA4,HRG,SLC1A4,PEPD,EMC3,NUP85,C3,ARL2,CDC42EP1,CIAO3,APOE,LAMA5,EIF2S3,NUP210,SORT1,LAMC1,IL36G,MED15,DDX18,CP,COL5A3,CASP6,TNPO3,EMC4,MFGE8,TIMM44,CRNN,DYNC1LI1,MMUT,AASDHPPT,PPP4C,NVL,MBNL1,RANBP2,DDAH1,RAB6B,SMC2,VBP1,EIF5B,U2AF1,FLAD1,PCYT1A,ALB,CLEC3B,COL1A2,ALDH1A1,COL6A2,AXL,PAIP1,MAEA,PA2G4,COL3A1,GON7,ASL,CD248,F2,PLG,HLTF,PIGS,…
GO:0043170	Macromolecule metabolic process	92	5781	0.16	0.33	0.0101	9606.ENSP00000199814,9606.ENSP00000221265,9606.ENSP00000227667,9606.ENSP00000230340,9606.ENSP00000244137,9606.ENSP00000245544,9606.ENSP00000245907,9606.ENSP00000252486,9606.ENSP00000253039,9606.ENSP00000263205,9606.ENSP00000263239,9606.ENSP00000265164,9606.ENSP00000278618,9606.ENSP00000279387,9606.ENSP00000281701,9606.ENSP00000282486,9606.ENSP00000283195,9606.ENSP00000289371,9606.ENSP00000291552,…	RBM22,PAF1,APOC3,BYSL,PEPD,NUP85,C3,APOE,EIF2S3,MED15,DDX18,CASP6,AASDHPPT,PPP4C,NVL,MBNL1,RANBP2,EIF5B,U2AF1,DCUN1D1,AXL,PAIP1,MAEA,PA2G4,COL3A1,GON7,F2,PLG,HLTF,PIGS,RPL38,NUP93,TRMT10C,CLU,NUP98,RBBP6,MVB12A,METAP2,MRE11,APOBEC3B,DRG1,EEF1G,PRPF4B,ZC3H15,SMARCA4,PES1,NRDC,MINK1,HP,CDC16,GMFB,F8,CTNNBL1,CFH,SASH1,APOA2,SYNCRIP,RPL5,COL5A1,RPL10A,FUCA1,ELP1,F10,NUP160,CHD3,EIF3CL,STAMBP,RPL24,G3…
GO:0051918	Negative regulation of fibrinolysis	4	13	1.45	0.54	0.0101	9606.ENSP00000226218,9606.ENSP00000232003,9606.ENSP00000308541,9606.ENSP00000308938	VTN,HRG,F2,PLG
GO:1905907	Negative regulation of amyloid fibril formation	4	13	1.45	0.54	0.0101	9606.ENSP00000252486,9606.ENSP00000286428,9606.ENSP00000315130,9606.ENSP00000363827	APOE,VBP1,CLU,HSPG2
GO:0071230	Cellular response to amino acid stimulus	7	76	0.92	0.5	0.0103	9606.ENSP00000225964,9606.ENSP00000297268,9606.ENSP00000304408,9606.ENSP00000355180,9606.ENSP00000364000,9606.ENSP00000364979,9606.ENSP00000386862	COL1A1,COL1A2,COL3A1,COL6A1,COL5A2,COL4A1,SH3BP4
GO:0045861	Negative regulation of proteolysis	14	339	0.57	0.44	0.0104	9606.ENSP00000215727,9606.ENSP00000226218,9606.ENSP00000232003,9606.ENSP00000245907,9606.ENSP00000278407,9606.ENSP00000308541,9606.ENSP00000323929,9606.ENSP00000332371,9606.ENSP00000333203,9606.ENSP00000359345,9606.ENSP00000416066,9606.ENSP00000450540,9606.ENSP00000493985,9606.ENSP00000497691	SERPIND1,VTN,HRG,C3,SERPING1,F2,A2M,COL7A1,SERPINA5,RPL5,SERPINA1,SERPINA3,KNG1,APLP2
GO:0032375	Negative regulation of cholesterol transport	4	14	1.41	0.53	0.0106	9606.ENSP00000227667,9606.ENSP00000252486,9606.ENSP00000356969,9606.ENSP00000466775	APOC3,APOE,APOA2,APOC2
GO:0043604	Amide biosynthetic process	18	536	0.48	0.42	0.0106	9606.ENSP00000253039,9606.ENSP00000289371,9606.ENSP00000302768,9606.ENSP00000307188,9606.ENSP00000309830,9606.ENSP00000329715,9606.ENSP00000331901,9606.ENSP00000338788,9606.ENSP00000359345,9606.ENSP00000363018,9606.ENSP00000370258,9606.ENSP00000377640,9606.ENSP00000387710,9606.ENSP00000410059,9606.ENSP00000416255,9606.ENSP00000429374,9606.ENSP00000449328,9606.ENSP00000472985	EIF2S3,EIF5B,PAIP1,ASL,RPL38,DRG1,EEF1G,ZC3H15,RPL5,RPL10A,EIF3CL,RPL24,TARS1,EEF1D,EIF4G1,RPS20,RPLP0,RPS5
GO:0051246	Regulation of protein metabolic process	51	2622	0.25	0.35	0.0106	9606.ENSP00000215727,9606.ENSP00000221265,9606.ENSP00000226218,9606.ENSP00000232003,9606.ENSP00000245907,9606.ENSP00000252486,9606.ENSP00000253039,9606.ENSP00000265164,9606.ENSP00000278407,9606.ENSP00000279387,9606.ENSP00000286428,9606.ENSP00000289371,9606.ENSP00000292782,9606.ENSP00000296130,9606.ENSP00000302768,9606.ENSP00000302886,9606.ENSP00000308541,9606.ENSP00000309830,9606.ENSP00000312356,…	SERPIND1,PAF1,VTN,HRG,C3,APOE,EIF2S3,CASP6,SERPING1,PPP4C,VBP1,EIF5B,DCUN1D1,CLEC3B,PAIP1,PA2G4,F2,RPL38,TRMT10C,CLU,A2M,FBN1,MRE11,EEF1G,COL7A1,SERPINA5,NRDC,C4BPA,SASH1,SYNCRIP,RPL5,ELP1,HSPG2,IPO7,EMILIN1,EIF3CL,PTPA,GIGYF2,MOV10,ARRB1,EEF1D,SERPINA1,EIF4G1,EHMT1,RPS20,SERPINA3,FKBP8,YTHDF3,DDX6,KNG1,APLP2
GO:0006954	Inflammatory response	18	538	0.48	0.42	0.0108	9606.ENSP00000216117,9606.ENSP00000245907,9606.ENSP00000259205,9606.ENSP00000278222,9606.ENSP00000301178,9606.ENSP00000308541,9606.ENSP00000312946,9606.ENSP00000315130,9606.ENSP00000323929,9606.ENSP00000341141,9606.ENSP00000348170,9606.ENSP00000353393,9606.ENSP00000356969,9606.ENSP00000363827,9606.ENSP00000416066,9606.ENSP00000450540,9606.ENSP00000486676,9606.ENSP00000493985	HMOX1,C3,IL36G,SAA4,AXL,F2,STAB1,CLU,A2M,SIGLEC1,HP,F8,APOA2,HSPG2,SERPINA1,SERPINA3,TREX1,KNG1
GO:0009611	Response to wounding	16	444	0.51	0.41	0.0124	9606.ENSP00000215727,9606.ENSP00000216117,9606.ENSP00000225964,9606.ENSP00000232003,9606.ENSP00000278407,9606.ENSP00000301178,9606.ENSP00000304408,9606.ENSP00000308541,9606.ENSP00000308938,9606.ENSP00000353393,9606.ENSP00000355536,9606.ENSP00000360882,9606.ENSP00000364709,9606.ENSP00000378431,9606.ENSP00000416066,9606.ENSP00000493985	SERPIND1,HMOX1,COL1A1,HRG,SERPING1,AXL,COL3A1,F2,PLG,F8,MTR,COL5A1,F10,MMRN1,SERPINA1,KNG1
GO:0010608	Post-transcriptional regulation of gene expression	18	546	0.48	0.4	0.0126	9606.ENSP00000253039,9606.ENSP00000289371,9606.ENSP00000302768,9606.ENSP00000302886,9606.ENSP00000309830,9606.ENSP00000312356,9606.ENSP00000331901,9606.ENSP00000358635,9606.ENSP00000359345,9606.ENSP00000363779,9606.ENSP00000370258,9606.ENSP00000387170,9606.ENSP00000399797,9606.ENSP00000410059,9606.ENSP00000416255,9606.ENSP00000416951,9606.ENSP00000478490,9606.ENSP00000478754	EIF2S3,EIF5B,PAIP1,PA2G4,RPL38,TRMT10C,EEF1G,SYNCRIP,RPL5,ELP1,EIF3CL,GIGYF2,MOV10,EEF1D,EIF4G1,ZC3H18,YTHDF3,DDX6
GO:0006518	Peptide metabolic process	18	547	0.48	0.4	0.0127	9606.ENSP00000253039,9606.ENSP00000289371,9606.ENSP00000302768,9606.ENSP00000309830,9606.ENSP00000329715,9606.ENSP00000331901,9606.ENSP00000338788,9606.ENSP00000346103,9606.ENSP00000359345,9606.ENSP00000363018,9606.ENSP00000370258,9606.ENSP00000377640,9606.ENSP00000387710,9606.ENSP00000410059,9606.ENSP00000416255,9606.ENSP00000429374,9606.ENSP00000449328,9606.ENSP00000472985	EIF2S3,EIF5B,PAIP1,RPL38,DRG1,EEF1G,ZC3H15,GPX4,RPL5,RPL10A,EIF3CL,RPL24,TARS1,EEF1D,EIF4G1,RPS20,RPLP0,RPS5
GO:0022613	Ribonucleoprotein complex biogenesis	16	449	0.51	0.41	0.0134	9606.ENSP00000230340,9606.ENSP00000253039,9606.ENSP00000263239,9606.ENSP00000281701,9606.ENSP00000302886,9606.ENSP00000309830,9606.ENSP00000346725,9606.ENSP00000359345,9606.ENSP00000363018,9606.ENSP00000370258,9606.ENSP00000377640,9606.ENSP00000383949,9606.ENSP00000417464,9606.ENSP00000449328,9606.ENSP00000458954,9606.ENSP00000472985	BYSL,EIF2S3,DDX18,NVL,PA2G4,RPL38,PES1,RPL5,RPL10A,EIF3CL,RPL24,SNU13,RRP1,RPLP0,NUP88,RPS5
GO:0006807	Nitrogen compound metabolic process	101	6643	0.14	0.3	0.0162	9606.ENSP00000199814,9606.ENSP00000216117,9606.ENSP00000221265,9606.ENSP00000227667,9606.ENSP00000230340,9606.ENSP00000244137,9606.ENSP00000245907,9606.ENSP00000252486,9606.ENSP00000253039,9606.ENSP00000263205,9606.ENSP00000263239,9606.ENSP00000265164,9606.ENSP00000274813,9606.ENSP00000278618,9606.ENSP00000279387,9606.ENSP00000281701,9606.ENSP00000282486,9606.ENSP00000283195,9606.ENSP00000284031,…	RBM22,HMOX1,PAF1,APOC3,BYSL,PEPD,C3,APOE,EIF2S3,MED15,DDX18,CASP6,MMUT,AASDHPPT,PPP4C,NVL,MBNL1,RANBP2,DDAH1,EIF5B,U2AF1,FLAD1,DCUN1D1,PCYT1A,ALDH1A1,AXL,PAIP1,MAEA,PA2G4,COL3A1,GON7,ASL,F2,PLG,HLTF,PIGS,RPL38,TRMT10C,CLU,NUP98,RBBP6,MVB12A,METAP2,MRE11,APOBEC3B,DRG1,EEF1G,PDE2A,PRPF4B,ZC3H15,SMARCA4,GPX4,PES1,NRDC,MINK1,HP,CDC16,GMFB,F8,CTNNBL1,MTR,CFH,SASH1,APOA2,SYNCRIP,RPL5,RPL10A,FUCA1,ELP1,…
GO:0034382	Chylomicron remnant clearance	3	5	1.74	0.49	0.0162	9606.ENSP00000227667,9606.ENSP00000252486,9606.ENSP00000466775	APOC3,APOE,APOC2
GO:0006950	Response to stress	60	3358	0.21	0.32	0.0166	9606.ENSP00000215727,9606.ENSP00000216117,9606.ENSP00000225964,9606.ENSP00000232003,9606.ENSP00000245907,9606.ENSP00000251588,9606.ENSP00000252486,9606.ENSP00000259205,9606.ENSP00000271835,9606.ENSP00000278222,9606.ENSP00000278407,9606.ENSP00000279387,9606.ENSP00000295897,9606.ENSP00000301178,9606.ENSP00000304408,9606.ENSP00000308541,9606.ENSP00000308938,9606.ENSP00000308944,9606.ENSP00000312946,…	SERPIND1,HMOX1,COL1A1,HRG,C3,CIAO3,APOE,IL36G,CRNN,SAA4,SERPING1,PPP4C,ALB,AXL,COL3A1,F2,PLG,HLTF,STAB1,CLU,RBBP6,A2M,MRE11,APOBEC3B,SIGLEC1,GPX4,MINK1,HP,F8,SELENON,MTR,C4BPA,CFH,APOA2,MNDA,SYNCRIP,COL5A1,HSPG2,F10,HLA-C,ATAD3A,IPO7,GPX3,SSC5D,G3BP1,MMRN1,TF,GIGYF2,MOV10,NABP1,NDRG1,SERPINA1,EIF4G1,STAU2,SERPINA3,IGHD,LRRC8E,TREX1,KNG1,PQBP1
GO:0030199	Collagen fibril organization	6	59	0.97	0.45	0.0169	9606.ENSP00000225964,9606.ENSP00000264828,9606.ENSP00000297268,9606.ENSP00000304408,9606.ENSP00000360882,9606.ENSP00000364000	COL1A1,COL5A3,COL1A2,COL3A1,COL5A1,COL5A2
GO:0044092	Negative regulation of molecular function	28	1143	0.35	0.35	0.0171	9606.ENSP00000215727,9606.ENSP00000216117,9606.ENSP00000226218,9606.ENSP00000227667,9606.ENSP00000232003,9606.ENSP00000245907,9606.ENSP00000246747,9606.ENSP00000252486,9606.ENSP00000256637,9606.ENSP00000263655,9606.ENSP00000278407,9606.ENSP00000323929,9606.ENSP00000332371,9606.ENSP00000333203,9606.ENSP00000348170,9606.ENSP00000350757,9606.ENSP00000356969,9606.ENSP00000359345,9606.ENSP00000369042,…	SERPIND1,HMOX1,VTN,APOC3,HRG,C3,ARL2,APOE,SORT1,CNRIP1,SERPING1,A2M,COL7A1,SERPINA5,HP,GMFB,APOA2,RPL5,IPO7,PTPA,SH3BP4,ARRB1,SERPINA1,RPS20,SERPINA3,APOC2,KNG1,APLP2
GO:0006956	Complement activation	6	60	0.96	0.45	0.0179	9606.ENSP00000245907,9606.ENSP00000278407,9606.ENSP00000315130,9606.ENSP00000356037,9606.ENSP00000356399,9606.ENSP00000478893	C3,SERPING1,CLU,C4BPA,CFH,IGHD
GO:0034504	Protein localization to nucleus	10	195	0.67	0.41	0.0185	9606.ENSP00000221265,9606.ENSP00000225964,9606.ENSP00000245544,9606.ENSP00000246747,9606.ENSP00000265388,9606.ENSP00000283195,9606.ENSP00000310668,9606.ENSP00000316032,9606.ENSP00000369042,9606.ENSP00000458954	PAF1,COL1A1,NUP85,ARL2,TNPO3,RANBP2,NUP93,NUP98,IPO7,NUP88
GO:0016043	Cellular component organization	86	5436	0.16	0.3	0.0191	9606.ENSP00000215957,9606.ENSP00000225964,9606.ENSP00000226218,9606.ENSP00000227667,9606.ENSP00000245046,9606.ENSP00000245544,9606.ENSP00000245907,9606.ENSP00000246747,9606.ENSP00000249014,9606.ENSP00000251588,9606.ENSP00000252486,9606.ENSP00000252999,9606.ENSP00000253039,9606.ENSP00000256637,9606.ENSP00000258341,9606.ENSP00000263205,9606.ENSP00000264828,9606.ENSP00000265164,9606.ENSP00000267750,…	MICALL1,COL1A1,VTN,APOC3,EMC3,NUP85,C3,ARL2,CDC42EP1,CIAO3,APOE,LAMA5,EIF2S3,SORT1,LAMC1,MED15,COL5A3,CASP6,EMC4,MFGE8,TIMM44,DYNC1LI1,RAB6B,SMC2,VBP1,COL1A2,MAEA,COL3A1,PLG,HLTF,RPL38,NUP93,CLU,NUP98,MVB12A,MRE11,PCM1,SERPINA5,SMC4,SMARCA4,GPX4,MINK1,COL6A6,COL18A1,RAB5B,SELENON,MTR,APOA2,RAB13,RPL5,COL5A1,COL5A2,COL15A1,COL4A1,ATAD3A,EMILIN1,CHD3,EIF3CL,KLC3,PTPA,RPL24,G3BP1,MYO5A,SNU13,TF,RMDN…
GO:0034641	Cellular nitrogen compound metabolic process	61	3463	0.2	0.31	0.0191	9606.ENSP00000199814,9606.ENSP00000216117,9606.ENSP00000221265,9606.ENSP00000230340,9606.ENSP00000253039,9606.ENSP00000263205,9606.ENSP00000263239,9606.ENSP00000278618,9606.ENSP00000279387,9606.ENSP00000281701,9606.ENSP00000282486,9606.ENSP00000289371,9606.ENSP00000291552,9606.ENSP00000292180,9606.ENSP00000302768,9606.ENSP00000302886,9606.ENSP00000306320,9606.ENSP00000307188,9606.ENSP00000308944,…	RBM22,HMOX1,PAF1,BYSL,EIF2S3,MED15,DDX18,AASDHPPT,PPP4C,NVL,MBNL1,EIF5B,U2AF1,FLAD1,PAIP1,PA2G4,GON7,ASL,HLTF,RPL38,TRMT10C,RBBP6,MRE11,APOBEC3B,DRG1,EEF1G,PDE2A,PRPF4B,ZC3H15,SMARCA4,GPX4,PES1,CTNNBL1,SYNCRIP,RPL5,RPL10A,ELP1,DDAH2,GALT,EIF3CL,RPL24,G3BP1,SNU13,ZNF638,TARS1,RBM17,SLC25A13,NABP1,EEF1D,EIF4G1,TRA2B,RRP1,EHMT1,RPS20,INTS4,RPLP0,RPS5,CWC15,MTHFD1L,TREX1,PQBP1
GO:0065009	Regulation of molecular function	56	3085	0.22	0.32	0.0191	9606.ENSP00000215727,9606.ENSP00000216117,9606.ENSP00000226218,9606.ENSP00000227667,9606.ENSP00000232003,9606.ENSP00000245907,9606.ENSP00000246747,9606.ENSP00000252486,9606.ENSP00000256637,9606.ENSP00000263655,9606.ENSP00000265164,9606.ENSP00000271835,9606.ENSP00000274813,9606.ENSP00000278407,9606.ENSP00000279387,9606.ENSP00000281701,9606.ENSP00000283195,9606.ENSP00000284031,9606.ENSP00000292782,…	SERPIND1,HMOX1,VTN,APOC3,HRG,C3,ARL2,APOE,SORT1,CNRIP1,CASP6,CRNN,MMUT,SERPING1,PPP4C,NVL,RANBP2,DDAH1,DCUN1D1,ALDH1A1,AXL,F2,CLU,A2M,FBN1,MRE11,COL7A1,SERPINA5,ZC3H15,SMARCA4,NRDC,MINK1,GIT2,HP,GMFB,SELENON,SASH1,APOA2,RPL5,DDAH2,IPO7,PTPA,SH3BP4,RANBP1,ARRB1,EEF1D,SERPINA1,EIF4G1,RPS20,ARFGAP2,PGAM5,SERPINA3,APOC2,TREX1,KNG1,APLP2
GO:0010901	Regulation of very-low-density lipoprotein particle remodeling	3	6	1.66	0.47	0.0205	9606.ENSP00000227667,9606.ENSP00000356969,9606.ENSP00000466775	APOC3,APOA2,APOC2
GO:0042730	Fibrinolysis	4	19	1.28	0.45	0.0205	9606.ENSP00000232003,9606.ENSP00000278407,9606.ENSP00000308541,9606.ENSP00000308938	HRG,SERPING1,F2,PLG
GO:0044238	Primary metabolic process	106	7156	0.13	0.29	0.0226	9606.ENSP00000199814,9606.ENSP00000221265,9606.ENSP00000225519,9606.ENSP00000227667,9606.ENSP00000230340,9606.ENSP00000244137,9606.ENSP00000245907,9606.ENSP00000252486,9606.ENSP00000253039,9606.ENSP00000254770,9606.ENSP00000263205,9606.ENSP00000263239,9606.ENSP00000265164,9606.ENSP00000274813,9606.ENSP00000278618,9606.ENSP00000279387,9606.ENSP00000281701,9606.ENSP00000282486,9606.ENSP00000283195,…	RBM22,PAF1,SHPK,APOC3,BYSL,PEPD,C3,APOE,EIF2S3,LANCL2,MED15,DDX18,CASP6,MMUT,AASDHPPT,PPP4C,NVL,MBNL1,RANBP2,DDAH1,EIF5B,U2AF1,FLAD1,DCUN1D1,PCYT1A,ALDH1A1,AXL,PAIP1,MAEA,PA2G4,COL3A1,GON7,ASL,F2,PLG,HLTF,PIGS,RPL38,TRMT10C,CLU,NUP98,RBBP6,MVB12A,METAP2,FBN1,MRE11,APOBEC3B,DRG1,EEF1G,PDE2A,PRPF4B,ZC3H15,SMARCA4,GPX4,PES1,NRDC,MINK1,HP,CDC16,GMFB,F8,CTNNBL1,MTR,CFH,SASH1,APOA2,SYNCRIP,RPL5,RPL10A,…
GO:0006958	Complement activation, classical pathway	5	40	1.05	0.42	0.0240	9606.ENSP00000245907,9606.ENSP00000278407,9606.ENSP00000315130,9606.ENSP00000356037,9606.ENSP00000478893	C3,SERPING1,CLU,C4BPA,IGHD
GO:0034384	High-density lipoprotein particle clearance	3	7	1.59	0.43	0.0270	9606.ENSP00000252486,9606.ENSP00000356969,9606.ENSP00000466775	APOE,APOA2,APOC2
GO:0030100	Regulation of endocytosis	10	209	0.64	0.37	0.0278	9606.ENSP00000226218,9606.ENSP00000227667,9606.ENSP00000245907,9606.ENSP00000252486,9606.ENSP00000301178,9606.ENSP00000315130,9606.ENSP00000353444,9606.ENSP00000385834,9606.ENSP00000409581,9606.ENSP00000466775	VTN,APOC3,C3,APOE,AXL,CLU,RAB5B,TF,ARRB1,APOC2
GO:0033365	Protein localization to organelle	20	713	0.41	0.33	0.0292	9606.ENSP00000215957,9606.ENSP00000221265,9606.ENSP00000225964,9606.ENSP00000245046,9606.ENSP00000245544,9606.ENSP00000246747,9606.ENSP00000256637,9606.ENSP00000265388,9606.ENSP00000267750,9606.ENSP00000270538,9606.ENSP00000283195,9606.ENSP00000285208,9606.ENSP00000310668,9606.ENSP00000315130,9606.ENSP00000316032,9606.ENSP00000324810,9606.ENSP00000327077,9606.ENSP00000369042,9606.ENSP00000386862,…	MICALL1,PAF1,COL1A1,EMC3,NUP85,ARL2,SORT1,TNPO3,EMC4,TIMM44,RANBP2,RAB6B,NUP93,CLU,NUP98,MVB12A,PCM1,IPO7,SH3BP4,NUP88
GO:0045807	Positive regulation of endocytosis	7	99	0.81	0.38	0.0292	9606.ENSP00000226218,9606.ENSP00000245907,9606.ENSP00000252486,9606.ENSP00000301178,9606.ENSP00000315130,9606.ENSP00000385834,9606.ENSP00000409581	VTN,C3,APOE,AXL,CLU,TF,ARRB1
GO:0034250	Positive regulation of cellular amide metabolic process	9	172	0.68	0.37	0.0304	9606.ENSP00000252486,9606.ENSP00000253039,9606.ENSP00000302768,9606.ENSP00000312356,9606.ENSP00000315130,9606.ENSP00000358635,9606.ENSP00000359345,9606.ENSP00000416255,9606.ENSP00000478490	APOE,EIF2S3,PAIP1,TRMT10C,CLU,SYNCRIP,RPL5,EIF4G1,YTHDF3
GO:0045292	mRNA cis splicing, via spliceosome	4	23	1.2	0.39	0.0344	9606.ENSP00000199814,9606.ENSP00000337194,9606.ENSP00000388638,9606.ENSP00000475615	RBM22,PRPF4B,RBM17,CWC15
GO:0002831	Regulation of response to biotic stimulus	13	361	0.51	0.32	0.0420	9606.ENSP00000232003,9606.ENSP00000245907,9606.ENSP00000252486,9606.ENSP00000265164,9606.ENSP00000278407,9606.ENSP00000323929,9606.ENSP00000356399,9606.ENSP00000356437,9606.ENSP00000357123,9606.ENSP00000369677,9606.ENSP00000478490,9606.ENSP00000486676,9606.ENSP00000498362	HRG,C3,APOE,CASP6,SERPING1,A2M,CFH,SASH1,MNDA,EMILIN1,YTHDF3,TREX1,PQBP1
GO:0044419	Biological process involved in interspecies interaction between organisms	32	1490	0.29	0.28	0.0425	9606.ENSP00000221265,9606.ENSP00000225519,9606.ENSP00000232003,9606.ENSP00000245907,9606.ENSP00000252486,9606.ENSP00000259205,9606.ENSP00000278407,9606.ENSP00000301178,9606.ENSP00000308541,9606.ENSP00000308938,9606.ENSP00000312946,9606.ENSP00000315130,9606.ENSP00000327459,9606.ENSP00000331901,9606.ENSP00000341141,9606.ENSP00000343896,9606.ENSP00000348170,9606.ENSP00000356037,9606.ENSP00000356399,…	PAF1,SHPK,HRG,C3,APOE,IL36G,SERPING1,AXL,F2,PLG,STAB1,CLU,APOBEC3B,EEF1G,SIGLEC1,SMARCA4,HP,C4BPA,CFH,SYNCRIP,HLA-C,ATAD3A,IPO7,SSC5D,G3BP1,TF,MOV10,OCIAD2,IGHD,TREX1,KNG1,PQBP1
GO:0006413	Translational initiation	6	75	0.86	0.35	0.0428	9606.ENSP00000253039,9606.ENSP00000289371,9606.ENSP00000302768,9606.ENSP00000370258,9606.ENSP00000416255,9606.ENSP00000472985	EIF2S3,EIF5B,PAIP1,EIF3CL,EIF4G1,RPS5
GO:0000027	Ribosomal large subunit assembly	4	25	1.16	0.37	0.0434	9606.ENSP00000309830,9606.ENSP00000359345,9606.ENSP00000377640,9606.ENSP00000449328	RPL38,RPL5,RPL24,RPLP0
GO:0052548	Regulation of endopeptidase activity	14	414	0.49	0.31	0.0435	9606.ENSP00000215727,9606.ENSP00000226218,9606.ENSP00000232003,9606.ENSP00000245907,9606.ENSP00000265164,9606.ENSP00000278407,9606.ENSP00000323929,9606.ENSP00000332371,9606.ENSP00000333203,9606.ENSP00000346890,9606.ENSP00000416066,9606.ENSP00000450540,9606.ENSP00000493985,9606.ENSP00000497691	SERPIND1,VTN,HRG,C3,CASP6,SERPING1,A2M,COL7A1,SERPINA5,NRDC,SERPINA1,SERPINA3,KNG1,APLP2
GO:0048259	Regulation of receptor-mediated endocytosis	7	109	0.77	0.34	0.0457	9606.ENSP00000226218,9606.ENSP00000227667,9606.ENSP00000245907,9606.ENSP00000315130,9606.ENSP00000385834,9606.ENSP00000409581,9606.ENSP00000466775	VTN,APOC3,C3,CLU,TF,ARRB1,APOC2
GO:0098542	Defense response to other organism	24	989	0.34	0.28	0.0476	9606.ENSP00000232003,9606.ENSP00000245907,9606.ENSP00000259205,9606.ENSP00000278407,9606.ENSP00000301178,9606.ENSP00000308541,9606.ENSP00000312946,9606.ENSP00000315130,9606.ENSP00000327459,9606.ENSP00000348170,9606.ENSP00000356037,9606.ENSP00000356399,9606.ENSP00000358635,9606.ENSP00000365402,9606.ENSP00000368030,9606.ENSP00000369042,9606.ENSP00000374274,9606.ENSP00000377681,9606.ENSP00000385834,…	HRG,C3,IL36G,SERPING1,AXL,F2,STAB1,CLU,APOBEC3B,HP,C4BPA,CFH,SYNCRIP,HLA-C,ATAD3A,IPO7,SSC5D,G3BP1,TF,MOV10,IGHD,TREX1,KNG1,PQBP1

## Sheet: Top 40SD-leukoca vs leukononca 
term ID	term description	observed gene count	background gene count	strength	signal	false discovery rate	matching proteins in your network (IDs)	matching proteins in your network (labels)
GO:0030199	Collagen fibril organization	6	59	1.73	1.54	3.39e-05	9606.ENSP00000225964,9606.ENSP00000264828,9606.ENSP00000297268,9606.ENSP00000304408,9606.ENSP00000360882,9606.ENSP00000364000	COL1A1,COL5A3,COL1A2,COL3A1,COL5A1,COL5A2
GO:0010901	Regulation of very-low-density lipoprotein particle remodeling	3	6	2.43	0.92	0.0040	9606.ENSP00000227667,9606.ENSP00000356969,9606.ENSP00000466775	APOC3,APOA2,APOC2
GO:0030198	Extracellular matrix organization	7	278	1.13	0.71	0.0045	9606.ENSP00000225964,9606.ENSP00000264828,9606.ENSP00000297268,9606.ENSP00000304408,9606.ENSP00000351310,9606.ENSP00000360882,9606.ENSP00000364000	COL1A1,COL5A3,COL1A2,COL3A1,COL6A6,COL5A1,COL5A2
GO:0033700	Phospholipid efflux	3	12	2.12	0.81	0.0071	9606.ENSP00000227667,9606.ENSP00000356969,9606.ENSP00000466775	APOC3,APOA2,APOC2
GO:0032375	Negative regulation of cholesterol transport	3	14	2.06	0.77	0.0091	9606.ENSP00000227667,9606.ENSP00000356969,9606.ENSP00000466775	APOC3,APOA2,APOC2
GO:0043691	Reverse cholesterol transport	3	18	1.95	0.7	0.0137	9606.ENSP00000227667,9606.ENSP00000356969,9606.ENSP00000466775	APOC3,APOA2,APOC2
GO:0043588	Skin development	6	266	1.08	0.56	0.0165	9606.ENSP00000225964,9606.ENSP00000264828,9606.ENSP00000297268,9606.ENSP00000304408,9606.ENSP00000360882,9606.ENSP00000364000	COL1A1,COL5A3,COL1A2,COL3A1,COL5A1,COL5A2
GO:0034381	Plasma lipoprotein particle clearance	3	24	1.82	0.62	0.0213	9606.ENSP00000227667,9606.ENSP00000356969,9606.ENSP00000466775	APOC3,APOA2,APOC2
GO:0045292	mRNA cis splicing, via spliceosome	3	23	1.84	0.63	0.0213	9606.ENSP00000199814,9606.ENSP00000337194,9606.ENSP00000475615	RBM22,PRPF4B,CWC15
GO:0071230	Cellular response to amino acid stimulus	4	76	1.45	0.59	0.0213	9606.ENSP00000225964,9606.ENSP00000297268,9606.ENSP00000304408,9606.ENSP00000364000	COL1A1,COL1A2,COL3A1,COL5A2
GO:0060621	Negative regulation of cholesterol import	2	2	2.73	0.63	0.0229	9606.ENSP00000227667,9606.ENSP00000356969	APOC3,APOA2
GO:0033344	Cholesterol efflux	3	27	1.77	0.61	0.0233	9606.ENSP00000227667,9606.ENSP00000356969,9606.ENSP00000466775	APOC3,APOA2,APOC2
GO:0034369	Plasma lipoprotein particle remodeling	3	29	1.74	0.58	0.0267	9606.ENSP00000227667,9606.ENSP00000356969,9606.ENSP00000466775	APOC3,APOA2,APOC2
GO:1903225	Negative regulation of endodermal cell differentiation	2	3	2.55	0.61	0.0267	9606.ENSP00000360882,9606.ENSP00000364000	COL5A1,COL5A2
GO:0010903	Negative regulation of very-low-density lipoprotein particle remodeling	2	4	2.43	0.56	0.0348	9606.ENSP00000227667,9606.ENSP00000356969	APOC3,APOA2
GO:0010916	Negative regulation of very-low-density lipoprotein particle clearance	2	4	2.43	0.56	0.0348	9606.ENSP00000227667,9606.ENSP00000466775	APOC3,APOC2
GO:1990748	Cellular detoxification	4	106	1.3	0.51	0.0348	9606.ENSP00000295897,9606.ENSP00000297785,9606.ENSP00000348170,9606.ENSP00000373477	ALB,ALDH1A1,HP,GPX3
GO:0034382	Chylomicron remnant clearance	2	5	2.33	0.54	0.0400	9606.ENSP00000227667,9606.ENSP00000466775	APOC3,APOC2
GO:0009256	10-formyltetrahydrofolate metabolic process	2	6	2.25	0.51	0.0466	9606.ENSP00000278618,9606.ENSP00000478253	AASDHPPT,MTHFD1L

## Sheet: Leuko non-ca and OSCC 
#term ID	term description	observed gene count	background gene count	strength	signal	false discovery rate	matching proteins in your network (IDs)	matching proteins in your network (labels)
GO:0097435	Supramolecular fiber organization	33	570	0.76	1.56	1.49e-11	9606.ENSP00000219150,9606.ENSP00000222271,9606.ENSP00000225964,9606.ENSP00000245932,9606.ENSP00000246635,9606.ENSP00000252244,9606.ENSP00000258787,9606.ENSP00000263946,9606.ENSP00000266718,9606.ENSP00000295685,9606.ENSP00000297268,9606.ENSP00000299767,9606.ENSP00000304408,9606.ENSP00000306261,9606.ENSP00000330101,9606.ENSP00000340820,9606.ENSP00000351807,9606.ENSP00000354960,9606.ENSP00000360882,…	CORO1A,COMP,COL1A1,VASP,KRT13,KRT1,MYO1G,PKP1,LUM,ARPC2,COL1A2,HSP90B1,COL3A1,KRT78,KRT76,MAPT,ELN,COLGALT2,COL5A1,COL5A2,DSP,MYO1B,LIMA1,LCP1,ARPC1B,TNXB,STMN1,KRT3,CFL1,CKAP5,SERPINH1,MYO1F,B2M
GO:0043588	Skin development	23	266	0.94	1.77	9.84e-11	9606.ENSP00000222271,9606.ENSP00000225964,9606.ENSP00000252244,9606.ENSP00000252999,9606.ENSP00000264474,9606.ENSP00000269576,9606.ENSP00000297268,9606.ENSP00000302579,9606.ENSP00000304408,9606.ENSP00000306261,9606.ENSP00000330101,9606.ENSP00000340510,9606.ENSP00000357789,9606.ENSP00000357791,9606.ENSP00000360882,9606.ENSP00000361892,9606.ENSP00000364000,9606.ENSP00000365465,9606.ENSP00000369129,…	COMP,COL1A1,KRT1,LAMA5,CSTA,KRT10,COL1A2,SCEL,COL3A1,KRT78,KRT76,PPL,FLG,HRNR,COL5A1,STK4,COL5A2,CDSN,DSP,TGM3,FLG2,STMN1,KRT3
GO:0002376	Immune system process	60	2121	0.45	0.99	2.81e-10	9606.ENSP00000009530,9606.ENSP00000219150,9606.ENSP00000220003,9606.ENSP00000225275,9606.ENSP00000242786,9606.ENSP00000243346,9606.ENSP00000252244,9606.ENSP00000255040,9606.ENSP00000258787,9606.ENSP00000259951,9606.ENSP00000264972,9606.ENSP00000292401,9606.ENSP00000296161,9606.ENSP00000300026,9606.ENSP00000302935,9606.ENSP00000310036,9606.ENSP00000315768,9606.ENSP00000327459,9606.ENSP00000331614,…	CD74,CORO1A,CSK,MPO,ADGRE5,NMI,KRT1,APCS,MYO1G,HLA-F,ZAP70,AZGP1,DTX3L,PPIB,IL16,CD34,STAT2,APOBEC3B,IKZF1,MX2,MAPT,TAP1,SH3PXD2A,ITGAL,ARG1,MSN,PARP9,STAT1,MNDA,CTSS,GBP2,GBP1,SLC25A5,IFIT3,STK4,LCN2,ALOX5,TAP2,SYK,CYBB,TRIM22,SERPINB9,SSC5D,TFRC,HLA-DRA,HLA-A,ITGB2,LCP1,MX1,PTPN6,IFI35,TAPBP,HLA-DPB1,DOCK2,CASP1,CNN2,RNF213,IFITM2,ITGAM,B2M
GO:0006955	Immune response	44	1321	0.52	1.02	6.76e-09	9606.ENSP00000009530,9606.ENSP00000219150,9606.ENSP00000220003,9606.ENSP00000242786,9606.ENSP00000243346,9606.ENSP00000252244,9606.ENSP00000255040,9606.ENSP00000258787,9606.ENSP00000264972,9606.ENSP00000296161,9606.ENSP00000302935,9606.ENSP00000315768,9606.ENSP00000327459,9606.ENSP00000333657,9606.ENSP00000346206,9606.ENSP00000349252,9606.ENSP00000349446,9606.ENSP00000353512,9606.ENSP00000354394,…	CD74,CORO1A,CSK,ADGRE5,NMI,KRT1,APCS,MYO1G,ZAP70,DTX3L,IL16,STAT2,APOBEC3B,MX2,TAP1,ITGAL,ARG1,PARP9,STAT1,CTSS,GBP2,GBP1,IFIT3,LCN2,ALOX5,TAP2,SYK,CYBB,TRIM22,SERPINB9,SSC5D,HLA-DRA,HLA-A,LCP1,MX1,PTPN6,IFI35,TAPBP,HLA-DPB1,DOCK2,CASP1,IFITM2,ITGAM,B2M
GO:0006952	Defense response	45	1394	0.51	1.0	8.08e-09	9606.ENSP00000009530,9606.ENSP00000219150,9606.ENSP00000225275,9606.ENSP00000242786,9606.ENSP00000243346,9606.ENSP00000249066,9606.ENSP00000252244,9606.ENSP00000255040,9606.ENSP00000262428,9606.ENSP00000264972,9606.ENSP00000296161,9606.ENSP00000312326,9606.ENSP00000315768,9606.ENSP00000327459,9606.ENSP00000333657,9606.ENSP00000340820,9606.ENSP00000346206,9606.ENSP00000349252,9606.ENSP00000349446,…	CD74,CORO1A,MPO,ADGRE5,NMI,APOL2,KRT1,APCS,COTL1,ZAP70,DTX3L,AOC3,STAT2,APOBEC3B,MX2,MAPT,TAP1,ITGAL,ARG1,PARP9,STAT1,MNDA,ECM1,GBP2,GBP1,IFIT3,LCN2,ALOX5,SYK,CYBB,TRIM22,LSP1,SSC5D,TFRC,HLA-A,ITGB2,MX1,PTPN6,IFI35,CASP1,PRB3,RNF213,IFITM2,ITGAM,B2M
GO:0019883	Antigen processing and presentation of endogenous antigen	9	25	1.56	1.82	8.06e-08	9606.ENSP00000009530,9606.ENSP00000259951,9606.ENSP00000292401,9606.ENSP00000346206,9606.ENSP00000364032,9606.ENSP00000378786,9606.ENSP00000379873,9606.ENSP00000404833,9606.ENSP00000497910	CD74,HLA-F,AZGP1,TAP1,TAP2,HLA-DRA,HLA-A,TAPBP,B2M
GO:0006950	Response to stress	72	3358	0.33	0.74	1.02e-07	9606.ENSP00000009530,9606.ENSP00000216780,9606.ENSP00000219150,9606.ENSP00000222271,9606.ENSP00000225275,9606.ENSP00000225964,9606.ENSP00000242786,9606.ENSP00000243346,9606.ENSP00000246635,9606.ENSP00000249066,9606.ENSP00000252244,9606.ENSP00000255040,9606.ENSP00000262428,9606.ENSP00000264972,9606.ENSP00000265132,9606.ENSP00000271835,9606.ENSP00000281938,9606.ENSP00000296161,9606.ENSP00000299767,…	CD74,PCK2,CORO1A,COMP,MPO,COL1A1,ADGRE5,NMI,KRT13,APOL2,KRT1,APCS,COTL1,ZAP70,AMBP,CRNN,HSPB8,DTX3L,HSP90B1,PLIN1,COL3A1,TBL2,CD34,AOC3,STAT2,PPP1CA,APOBEC3B,MX2,PPL,MAPT,PRELP,TAP1,ITGAL,ARG1,PARP9,STAT1,ZNF277,MNDA,ECM1,GBP2,GBP1,IFIT3,COL5A1,LCN2,ALOX5,SYK,CYBB,DSP,TRIM22,LSP1,SOD3,GPX3,SSC5D,TFRC,ASNS,HLA-A,ITGB2,MX1,PTPN6,IFI35,CASP1,SERPINH1,PRB3,UBE2J1,CNN2,RNF213,HYOU1,IFITM2,HSPH1,ITGAM,…
GO:0007155	Cell adhesion	35	965	0.56	0.99	1.03e-07	9606.ENSP00000188790,9606.ENSP00000219150,9606.ENSP00000222271,9606.ENSP00000242786,9606.ENSP00000244333,9606.ENSP00000252999,9606.ENSP00000257192,9606.ENSP00000258787,9606.ENSP00000263946,9606.ENSP00000264474,9606.ENSP00000264972,9606.ENSP00000265132,9606.ENSP00000271835,9606.ENSP00000292401,9606.ENSP00000295550,9606.ENSP00000300527,9606.ENSP00000304408,9606.ENSP00000310036,9606.ENSP00000312326,…	FAP,CORO1A,COMP,ADGRE5,LYPD3,LAMA5,DSG1,MYO1G,PKP1,CSTA,ZAP70,AMBP,CRNN,AZGP1,COL6A3,COL6A2,COL3A1,CD34,AOC3,FBN1,PPP1CA,COL7A1,ITGAL,COL6A6,MSN,COL6A1,COL5A1,SYK,CDSN,DSP,FLG2,ITGB2,PTPN6,TNXB,ITGAM
GO:0002483	Antigen processing and presentation of endogenous peptide antigen	8	18	1.65	1.77	1.71e-07	9606.ENSP00000259951,9606.ENSP00000292401,9606.ENSP00000346206,9606.ENSP00000364032,9606.ENSP00000378786,9606.ENSP00000379873,9606.ENSP00000404833,9606.ENSP00000497910	HLA-F,AZGP1,TAP1,TAP2,HLA-DRA,HLA-A,TAPBP,B2M
GO:0048002	Antigen processing and presentation of peptide antigen	11	60	1.27	1.6	1.71e-07	9606.ENSP00000009530,9606.ENSP00000259951,9606.ENSP00000292401,9606.ENSP00000346206,9606.ENSP00000357981,9606.ENSP00000364032,9606.ENSP00000378786,9606.ENSP00000379873,9606.ENSP00000404833,9606.ENSP00000408146,9606.ENSP00000497910	CD74,HLA-F,AZGP1,TAP1,CTSS,TAP2,HLA-DRA,HLA-A,TAPBP,HLA-DPB1,B2M
GO:0050776	Regulation of immune response	32	844	0.58	0.99	1.94e-07	9606.ENSP00000009530,9606.ENSP00000220003,9606.ENSP00000243346,9606.ENSP00000252244,9606.ENSP00000258787,9606.ENSP00000259951,9606.ENSP00000264972,9606.ENSP00000265132,9606.ENSP00000304408,9606.ENSP00000315768,9606.ENSP00000349446,9606.ENSP00000352936,9606.ENSP00000353512,9606.ENSP00000357123,9606.ENSP00000357981,9606.ENSP00000358045,9606.ENSP00000359504,9606.ENSP00000364032,9606.ENSP00000364898,…	CD74,CSK,NMI,KRT1,MYO1G,HLA-F,ZAP70,AMBP,COL3A1,STAT2,ARG1,SPINK5,PARP9,MNDA,CTSS,ECM1,GBP1,TAP2,SYK,SERPINB9,TFRC,HLA-DRA,HLA-A,ITGB2,PTPN6,IFI35,TAPBP,HLA-DPB1,FAM49B,CASP1,ITGAM,B2M
GO:0030216	Keratinocyte differentiation	14	138	1.01	1.36	4.40e-07	9606.ENSP00000252244,9606.ENSP00000264474,9606.ENSP00000269576,9606.ENSP00000302579,9606.ENSP00000306261,9606.ENSP00000330101,9606.ENSP00000340510,9606.ENSP00000357789,9606.ENSP00000357791,9606.ENSP00000361892,9606.ENSP00000365465,9606.ENSP00000369129,9606.ENSP00000370867,9606.ENSP00000413479	KRT1,CSTA,KRT10,SCEL,KRT78,KRT76,PPL,FLG,HRNR,STK4,CDSN,DSP,TGM3,KRT3
GO:0009605	Response to external stimulus	56	2355	0.38	0.75	4.96e-07	9606.ENSP00000009530,9606.ENSP00000216780,9606.ENSP00000219150,9606.ENSP00000225275,9606.ENSP00000225964,9606.ENSP00000243346,9606.ENSP00000245932,9606.ENSP00000252244,9606.ENSP00000252999,9606.ENSP00000255040,9606.ENSP00000262428,9606.ENSP00000264972,9606.ENSP00000296161,9606.ENSP00000300026,9606.ENSP00000302579,9606.ENSP00000302935,9606.ENSP00000307260,9606.ENSP00000315768,9606.ENSP00000325527,…	CD74,PCK2,CORO1A,MPO,COL1A1,NMI,VASP,KRT1,LAMA5,APCS,COTL1,ZAP70,DTX3L,PPIB,SCEL,IL16,TBL2,STAT2,FBN1,PPP1CA,APOBEC3B,MX2,PPL,ARG1,PARP9,STAT1,GBP2,GBP1,IFIT3,LCN2,ALOX5,TAP2,SYK,CYBB,TRIM22,LSP1,SSC5D,TFRC,ASNS,TYMP,HLA-A,ITGB2,MX1,PTPN6,IFI35,STMN1,FAM49B,DOCK2,CFL1,CASP1,PRB3,CNN2,RNF213,IFITM2,ITGAM,B2M
GO:0018149	Peptide cross-linking	9	37	1.39	1.55	6.26e-07	9606.ENSP00000052754,9606.ENSP00000252244,9606.ENSP00000264474,9606.ENSP00000269576,9606.ENSP00000304408,9606.ENSP00000327336,9606.ENSP00000357789,9606.ENSP00000369129,9606.ENSP00000370867	DCN,KRT1,CSTA,KRT10,COL3A1,BGN,FLG,DSP,TGM3
GO:0050896	Response to stimulus	121	7835	0.19	0.57	6.26e-07	9606.ENSP00000009530,9606.ENSP00000188790,9606.ENSP00000216780,9606.ENSP00000219150,9606.ENSP00000220003,9606.ENSP00000222271,9606.ENSP00000225275,9606.ENSP00000225964,9606.ENSP00000225972,9606.ENSP00000228945,9606.ENSP00000237530,9606.ENSP00000242786,9606.ENSP00000243346,9606.ENSP00000245932,9606.ENSP00000246635,9606.ENSP00000249066,9606.ENSP00000252244,9606.ENSP00000252999,9606.ENSP00000255040,…	CD74,FAP,PCK2,CORO1A,CSK,COMP,MPO,COL1A1,LRRC59,ARHGDIB,RPN2,ADGRE5,NMI,VASP,KRT13,APOL2,KRT1,LAMA5,APCS,DSG1,MYO1G,CILP,COTL1,LCN1,PKP1,ZAP70,AMBP,SERPINB13,CRNN,HSPB8,AZGP1,DTX3L,COL1A2,HSP90B1,PPIB,PLIN1,COL6A2,GPD1,SCEL,IL16,COL3A1,TBL2,CD34,AOC3,STAT2,OLFML3,FBN1,PPP1CA,APOBEC3B,OLFML1,MX2,ARHGEF1,PPL,MAPT,PRELP,TAP1,ITGAL,ARG1,DNMT1,MSN,PARP9,STAT1,ZNF277,COL6A1,MNDA,CTSS,ECM1,GBP2,GBP1,IFI…
GO:0045087	Innate immune response	29	754	0.59	0.95	7.93e-07	9606.ENSP00000009530,9606.ENSP00000219150,9606.ENSP00000243346,9606.ENSP00000252244,9606.ENSP00000255040,9606.ENSP00000264972,9606.ENSP00000296161,9606.ENSP00000315768,9606.ENSP00000327459,9606.ENSP00000333657,9606.ENSP00000349446,9606.ENSP00000353512,9606.ENSP00000354394,9606.ENSP00000359497,9606.ENSP00000359504,9606.ENSP00000360876,9606.ENSP00000362108,9606.ENSP00000364898,9606.ENSP00000367851,…	CD74,CORO1A,NMI,KRT1,APCS,ZAP70,DTX3L,STAT2,APOBEC3B,MX2,ARG1,PARP9,STAT1,GBP2,GBP1,IFIT3,LCN2,SYK,CYBB,TRIM22,SSC5D,HLA-A,MX1,PTPN6,IFI35,CASP1,IFITM2,ITGAM,B2M
GO:0002478	Antigen processing and presentation of exogenous peptide antigen	9	39	1.37	1.51	8.08e-07	9606.ENSP00000009530,9606.ENSP00000259951,9606.ENSP00000346206,9606.ENSP00000357981,9606.ENSP00000364032,9606.ENSP00000378786,9606.ENSP00000379873,9606.ENSP00000408146,9606.ENSP00000497910	CD74,HLA-F,TAP1,CTSS,TAP2,HLA-DRA,HLA-A,HLA-DPB1,B2M
GO:0044419	Biological process involved in interspecies interaction between organisms	42	1490	0.45	0.81	8.40e-07	9606.ENSP00000009530,9606.ENSP00000216780,9606.ENSP00000219150,9606.ENSP00000225275,9606.ENSP00000243346,9606.ENSP00000252244,9606.ENSP00000255040,9606.ENSP00000262428,9606.ENSP00000264972,9606.ENSP00000296161,9606.ENSP00000300026,9606.ENSP00000315768,9606.ENSP00000327459,9606.ENSP00000333657,9606.ENSP00000349446,9606.ENSP00000353512,9606.ENSP00000354394,9606.ENSP00000359497,9606.ENSP00000359504,…	CD74,PCK2,CORO1A,MPO,NMI,KRT1,APCS,COTL1,ZAP70,DTX3L,PPIB,STAT2,APOBEC3B,MX2,ARG1,PARP9,STAT1,GBP2,GBP1,IFIT3,LCN2,TAP2,SYK,SLC3A2,CYBB,TRIM22,SSC5D,TFRC,HLA-A,MX1,PTPN6,IFI35,STMN1,FAM49B,CFL1,CASP1,PRB3,SLC1A5,RNF213,IFITM2,ITGAM,B2M
GO:0002682	Regulation of immune system process	41	1438	0.46	0.81	9.51e-07	9606.ENSP00000009530,9606.ENSP00000219150,9606.ENSP00000220003,9606.ENSP00000243346,9606.ENSP00000252244,9606.ENSP00000255040,9606.ENSP00000258787,9606.ENSP00000259951,9606.ENSP00000264972,9606.ENSP00000265132,9606.ENSP00000302935,9606.ENSP00000304408,9606.ENSP00000315768,9606.ENSP00000325527,9606.ENSP00000349446,9606.ENSP00000352936,9606.ENSP00000353408,9606.ENSP00000353512,9606.ENSP00000354394,…	CD74,CORO1A,CSK,NMI,KRT1,APCS,MYO1G,HLA-F,ZAP70,AMBP,IL16,COL3A1,STAT2,FBN1,ARG1,SPINK5,MSN,PARP9,STAT1,MNDA,CTSS,ECM1,GBP1,TAP2,SYK,SERPINB9,TFRC,HLA-DRA,HLA-A,ITGB2,PTPN6,IFI35,TAPBP,HLA-DPB1,FAM49B,CASP1,UBE2J1,CNN2,HSPH1,ITGAM,B2M
GO:0008544	Epidermis development	19	320	0.78	1.12	9.51e-07	9606.ENSP00000252244,9606.ENSP00000252999,9606.ENSP00000264474,9606.ENSP00000269576,9606.ENSP00000302579,9606.ENSP00000306261,9606.ENSP00000330101,9606.ENSP00000332371,9606.ENSP00000340510,9606.ENSP00000352936,9606.ENSP00000357789,9606.ENSP00000357791,9606.ENSP00000361892,9606.ENSP00000365465,9606.ENSP00000369129,9606.ENSP00000370867,9606.ENSP00000373370,9606.ENSP00000413479,9606.ENSP00000482841	KRT1,LAMA5,CSTA,KRT10,SCEL,KRT78,KRT76,COL7A1,PPL,SPINK5,FLG,HRNR,STK4,CDSN,DSP,TGM3,FLG2,KRT3,CRABP2
GO:0030199	Collagen fibril organization	10	59	1.23	1.43	1.05e-06	9606.ENSP00000222271,9606.ENSP00000225964,9606.ENSP00000266718,9606.ENSP00000297268,9606.ENSP00000304408,9606.ENSP00000354960,9606.ENSP00000360882,9606.ENSP00000364000,9606.ENSP00000407685,9606.ENSP00000434412	COMP,COL1A1,LUM,COL1A2,COL3A1,COLGALT2,COL5A1,COL5A2,TNXB,SERPINH1
GO:0098542	Defense response to other organism	33	989	0.53	0.88	1.12e-06	9606.ENSP00000009530,9606.ENSP00000219150,9606.ENSP00000225275,9606.ENSP00000243346,9606.ENSP00000252244,9606.ENSP00000255040,9606.ENSP00000262428,9606.ENSP00000264972,9606.ENSP00000296161,9606.ENSP00000315768,9606.ENSP00000327459,9606.ENSP00000333657,9606.ENSP00000349446,9606.ENSP00000353512,9606.ENSP00000354394,9606.ENSP00000359497,9606.ENSP00000359504,9606.ENSP00000360876,9606.ENSP00000362108,…	CD74,CORO1A,MPO,NMI,KRT1,APCS,COTL1,ZAP70,DTX3L,STAT2,APOBEC3B,MX2,ARG1,PARP9,STAT1,GBP2,GBP1,IFIT3,LCN2,SYK,CYBB,TRIM22,SSC5D,HLA-A,MX1,PTPN6,IFI35,CASP1,PRB3,RNF213,IFITM2,ITGAM,B2M
GO:0009607	Response to biotic stimulus	39	1375	0.45	0.78	2.51e-06	9606.ENSP00000009530,9606.ENSP00000188790,9606.ENSP00000216780,9606.ENSP00000219150,9606.ENSP00000225275,9606.ENSP00000243346,9606.ENSP00000252244,9606.ENSP00000255040,9606.ENSP00000262428,9606.ENSP00000264972,9606.ENSP00000296161,9606.ENSP00000315768,9606.ENSP00000327459,9606.ENSP00000333657,9606.ENSP00000349446,9606.ENSP00000353512,9606.ENSP00000354394,9606.ENSP00000359497,9606.ENSP00000359504,…	CD74,FAP,PCK2,CORO1A,MPO,NMI,KRT1,APCS,COTL1,ZAP70,DTX3L,STAT2,APOBEC3B,MX2,ARG1,PARP9,STAT1,GBP2,GBP1,IFIT3,LCN2,TAP2,SYK,CYBB,TRIM22,SSC5D,HLA-A,MX1,PTPN6,IFI35,STMN1,FAM49B,CFL1,CASP1,PRB3,RNF213,IFITM2,ITGAM,B2M
GO:0009913	Epidermal cell differentiation	15	201	0.88	1.14	2.61e-06	9606.ENSP00000252244,9606.ENSP00000264474,9606.ENSP00000269576,9606.ENSP00000302579,9606.ENSP00000306261,9606.ENSP00000330101,9606.ENSP00000340510,9606.ENSP00000352936,9606.ENSP00000357789,9606.ENSP00000357791,9606.ENSP00000361892,9606.ENSP00000365465,9606.ENSP00000369129,9606.ENSP00000370867,9606.ENSP00000413479	KRT1,CSTA,KRT10,SCEL,KRT78,KRT76,PPL,SPINK5,FLG,HRNR,STK4,CDSN,DSP,TGM3,KRT3
GO:0051707	Response to other organism	38	1328	0.46	0.78	2.91e-06	9606.ENSP00000009530,9606.ENSP00000216780,9606.ENSP00000219150,9606.ENSP00000225275,9606.ENSP00000243346,9606.ENSP00000252244,9606.ENSP00000255040,9606.ENSP00000262428,9606.ENSP00000264972,9606.ENSP00000296161,9606.ENSP00000315768,9606.ENSP00000327459,9606.ENSP00000333657,9606.ENSP00000349446,9606.ENSP00000353512,9606.ENSP00000354394,9606.ENSP00000359497,9606.ENSP00000359504,9606.ENSP00000360876,…	CD74,PCK2,CORO1A,MPO,NMI,KRT1,APCS,COTL1,ZAP70,DTX3L,STAT2,APOBEC3B,MX2,ARG1,PARP9,STAT1,GBP2,GBP1,IFIT3,LCN2,TAP2,SYK,CYBB,TRIM22,SSC5D,HLA-A,MX1,PTPN6,IFI35,STMN1,FAM49B,CFL1,CASP1,PRB3,RNF213,IFITM2,ITGAM,B2M
GO:0045229	External encapsulating structure organization	17	281	0.78	1.05	3.79e-06	9606.ENSP00000222271,9606.ENSP00000225964,9606.ENSP00000266718,9606.ENSP00000297268,9606.ENSP00000304408,9606.ENSP00000351310,9606.ENSP00000351807,9606.ENSP00000352936,9606.ENSP00000354960,9606.ENSP00000357791,9606.ENSP00000357981,9606.ENSP00000360882,9606.ENSP00000364000,9606.ENSP00000370867,9606.ENSP00000381581,9606.ENSP00000407685,9606.ENSP00000434412	COMP,COL1A1,LUM,COL1A2,COL3A1,COL6A6,ELN,SPINK5,COLGALT2,HRNR,CTSS,COL5A1,COL5A2,TGM3,LCP1,TNXB,SERPINH1
GO:0009987	Cellular process	179	14826	0.08	0.46	4.19e-06	9606.ENSP00000009530,9606.ENSP00000052754,9606.ENSP00000188790,9606.ENSP00000205636,9606.ENSP00000216780,9606.ENSP00000219150,9606.ENSP00000220003,9606.ENSP00000222271,9606.ENSP00000225275,9606.ENSP00000225964,9606.ENSP00000225972,9606.ENSP00000228945,9606.ENSP00000236040,9606.ENSP00000237530,9606.ENSP00000239891,9606.ENSP00000242786,9606.ENSP00000243346,9606.ENSP00000244333,9606.ENSP00000244534,…	CD74,DCN,FAP,CMTM6,PCK2,CORO1A,CSK,COMP,MPO,COL1A1,LRRC59,ARHGDIB,P3H1,RPN2,ALG5,ADGRE5,NMI,LYPD3,H1-3,VASP,KRT13,KRT1,LAMA5,PPAN,RBM39,APCS,DSG1,MYO1G,LMNB1,MAN2A1,CILP,COTL1,PKP1,CSTA,ZAP70,AMBP,LUM,KRT10,TINAGL1,CRNN,HSPB8,AZGP1,COL6A3,ARPC2,DTX3L,RPN1,COL1A2,HSP90B1,PPIB,PLIN1,COL6A2,GPD1,SCEL,IL16,COL3A1,KRT78,TBL2,CD34,AOC3,STAT2,OLFML3,SEPTIN1,FBN1,PPP1CA,BGN,APOBEC3B,FMNL1,H1-5,KRT76,IKZF…
GO:0031343	Positive regulation of cell killing	9	64	1.15	1.13	2.07e-05	9606.ENSP00000259951,9606.ENSP00000349446,9606.ENSP00000364032,9606.ENSP00000364898,9606.ENSP00000378786,9606.ENSP00000379873,9606.ENSP00000429150,9606.ENSP00000496959,9606.ENSP00000497910	HLA-F,ARG1,TAP2,SYK,HLA-DRA,HLA-A,FAM49B,ITGAM,B2M
GO:0010033	Response to organic substance	56	2692	0.32	0.61	2.34e-05	9606.ENSP00000009530,9606.ENSP00000216780,9606.ENSP00000219150,9606.ENSP00000220003,9606.ENSP00000222271,9606.ENSP00000225275,9606.ENSP00000225964,9606.ENSP00000243346,9606.ENSP00000257192,9606.ENSP00000261883,9606.ENSP00000271835,9606.ENSP00000281938,9606.ENSP00000297268,9606.ENSP00000299767,9606.ENSP00000300527,9606.ENSP00000301149,9606.ENSP00000302935,9606.ENSP00000304408,9606.ENSP00000307260,…	CD74,PCK2,CORO1A,CSK,COMP,MPO,COL1A1,NMI,DSG1,CILP,CRNN,HSPB8,COL1A2,HSP90B1,COL6A2,GPD1,IL16,COL3A1,TBL2,STAT2,FBN1,MX2,MAPT,ARG1,DNMT1,MSN,STAT1,COL6A1,MNDA,CTSS,GBP2,GBP1,IFIT3,COL5A2,TAP2,SYK,SLC3A2,CYBB,SERPINB9,LSP1,GPX3,SSC5D,TFRC,ITGB2,MX1,ARPC1B,PTPN6,FBP1,FAM49B,CASP1,SERPINH1,NNMT,UBE2J1,IFITM2,HSPH1,B2M
GO:0050778	Positive regulation of immune response	21	502	0.62	0.83	2.59e-05	9606.ENSP00000009530,9606.ENSP00000220003,9606.ENSP00000243346,9606.ENSP00000252244,9606.ENSP00000258787,9606.ENSP00000259951,9606.ENSP00000264972,9606.ENSP00000353512,9606.ENSP00000357123,9606.ENSP00000364032,9606.ENSP00000364898,9606.ENSP00000376197,9606.ENSP00000378786,9606.ENSP00000379873,9606.ENSP00000380948,9606.ENSP00000391592,9606.ENSP00000395590,9606.ENSP00000408146,9606.ENSP00000429150,…	CD74,CSK,NMI,KRT1,MYO1G,HLA-F,ZAP70,PARP9,MNDA,TAP2,SYK,TFRC,HLA-DRA,HLA-A,ITGB2,PTPN6,IFI35,HLA-DPB1,FAM49B,ITGAM,B2M
GO:0031341	Regulation of cell killing	10	102	0.99	0.96	7.48e-05	9606.ENSP00000259951,9606.ENSP00000349446,9606.ENSP00000364032,9606.ENSP00000364898,9606.ENSP00000370074,9606.ENSP00000378786,9606.ENSP00000379873,9606.ENSP00000429150,9606.ENSP00000496959,9606.ENSP00000497910	HLA-F,ARG1,TAP2,SYK,SERPINB9,HLA-DRA,HLA-A,FAM49B,ITGAM,B2M
GO:1903039	Positive regulation of leukocyte cell-cell adhesion	15	274	0.74	0.83	8.56e-05	9606.ENSP00000009530,9606.ENSP00000219150,9606.ENSP00000220003,9606.ENSP00000264972,9606.ENSP00000363512,9606.ENSP00000364898,9606.ENSP00000376197,9606.ENSP00000378786,9606.ENSP00000379873,9606.ENSP00000380948,9606.ENSP00000391592,9606.ENSP00000408146,9606.ENSP00000429150,9606.ENSP00000487365,9606.ENSP00000497910	CD74,CORO1A,CSK,ZAP70,ALOX5,SYK,TFRC,HLA-DRA,HLA-A,ITGB2,PTPN6,HLA-DPB1,FAM49B,HSPH1,B2M
GO:0030198	Extracellular matrix organization	15	278	0.73	0.82	9.94e-05	9606.ENSP00000222271,9606.ENSP00000225964,9606.ENSP00000266718,9606.ENSP00000297268,9606.ENSP00000304408,9606.ENSP00000351310,9606.ENSP00000351807,9606.ENSP00000352936,9606.ENSP00000354960,9606.ENSP00000357981,9606.ENSP00000360882,9606.ENSP00000364000,9606.ENSP00000381581,9606.ENSP00000407685,9606.ENSP00000434412	COMP,COL1A1,LUM,COL1A2,COL3A1,COL6A6,ELN,SPINK5,COLGALT2,CTSS,COL5A1,COL5A2,LCP1,TNXB,SERPINH1
GO:0001912	Positive regulation of leukocyte mediated cytotoxicity	8	57	1.15	0.98	0.00010	9606.ENSP00000259951,9606.ENSP00000349446,9606.ENSP00000364032,9606.ENSP00000378786,9606.ENSP00000379873,9606.ENSP00000429150,9606.ENSP00000496959,9606.ENSP00000497910	HLA-F,ARG1,TAP2,HLA-DRA,HLA-A,FAM49B,ITGAM,B2M
GO:0032963	Collagen metabolic process	8	61	1.12	0.94	0.00015	9606.ENSP00000225964,9606.ENSP00000236040,9606.ENSP00000297268,9606.ENSP00000349446,9606.ENSP00000357981,9606.ENSP00000360882,9606.ENSP00000407685,9606.ENSP00000434412	COL1A1,P3H1,COL1A2,ARG1,CTSS,COL5A1,TNXB,SERPINH1
GO:0001910	Regulation of leukocyte mediated cytotoxicity	9	86	1.02	0.9	0.00016	9606.ENSP00000259951,9606.ENSP00000349446,9606.ENSP00000364032,9606.ENSP00000370074,9606.ENSP00000378786,9606.ENSP00000379873,9606.ENSP00000429150,9606.ENSP00000496959,9606.ENSP00000497910	HLA-F,ARG1,TAP2,SERPINB9,HLA-DRA,HLA-A,FAM49B,ITGAM,B2M
GO:0009888	Tissue development	40	1723	0.37	0.58	0.00018	9606.ENSP00000216780,9606.ENSP00000222271,9606.ENSP00000225964,9606.ENSP00000245932,9606.ENSP00000246635,9606.ENSP00000252244,9606.ENSP00000252999,9606.ENSP00000264474,9606.ENSP00000269576,9606.ENSP00000297268,9606.ENSP00000302579,9606.ENSP00000304408,9606.ENSP00000306261,9606.ENSP00000310036,9606.ENSP00000326031,9606.ENSP00000327336,9606.ENSP00000330101,9606.ENSP00000331614,9606.ENSP00000332371,…	PCK2,COMP,COL1A1,VASP,KRT13,KRT1,LAMA5,CSTA,KRT10,COL1A2,SCEL,COL3A1,KRT78,CD34,PPP1CA,BGN,KRT76,IKZF1,COL7A1,PPL,ELN,SPINK5,MSN,STAT1,COL6A1,FLG,HRNR,ECM1,COL5A1,STK4,CDSN,DSP,TGM3,FLG2,ITGB2,KRT3,SERPINH1,MTHFD1L,CRABP2,ITGAM
GO:0002696	Positive regulation of leukocyte activation	17	384	0.65	0.73	0.00019	9606.ENSP00000009530,9606.ENSP00000219150,9606.ENSP00000220003,9606.ENSP00000259951,9606.ENSP00000264972,9606.ENSP00000302935,9606.ENSP00000364898,9606.ENSP00000376197,9606.ENSP00000378786,9606.ENSP00000379873,9606.ENSP00000380948,9606.ENSP00000391592,9606.ENSP00000408146,9606.ENSP00000429150,9606.ENSP00000487365,9606.ENSP00000496959,9606.ENSP00000497910	CD74,CORO1A,CSK,HLA-F,ZAP70,IL16,SYK,TFRC,HLA-DRA,HLA-A,ITGB2,PTPN6,HLA-DPB1,FAM49B,HSPH1,ITGAM,B2M
GO:0019885	Antigen processing and presentation of endogenous peptide antigen via MHC class I	5	12	1.62	1.0	0.00019	9606.ENSP00000346206,9606.ENSP00000364032,9606.ENSP00000379873,9606.ENSP00000404833,9606.ENSP00000497910	TAP1,TAP2,HLA-A,TAPBP,B2M
GO:0042221	Response to chemical	70	4010	0.24	0.5	0.00019	9606.ENSP00000009530,9606.ENSP00000216780,9606.ENSP00000219150,9606.ENSP00000220003,9606.ENSP00000222271,9606.ENSP00000225275,9606.ENSP00000225964,9606.ENSP00000237530,9606.ENSP00000243346,9606.ENSP00000245932,9606.ENSP00000252999,9606.ENSP00000257192,9606.ENSP00000261883,9606.ENSP00000265132,9606.ENSP00000271835,9606.ENSP00000281938,9606.ENSP00000292401,9606.ENSP00000297268,9606.ENSP00000299767,…	CD74,PCK2,CORO1A,CSK,COMP,MPO,COL1A1,RPN2,NMI,VASP,LAMA5,DSG1,CILP,AMBP,CRNN,HSPB8,AZGP1,COL1A2,HSP90B1,PPIB,COL6A2,GPD1,IL16,COL3A1,TBL2,AOC3,STAT2,FBN1,PPP1CA,MX2,MAPT,ARG1,DNMT1,MSN,STAT1,ZNF277,COL6A1,MNDA,CTSS,GBP2,GBP1,IFIT3,ALOX5,COL5A2,TAP2,SYK,SLC3A2,CYBB,SERPINB9,LSP1,SOD3,GPX3,SSC5D,TFRC,TYMP,ITGB2,MX1,ARPC1B,PTPN6,FBP1,FAM49B,DOCK2,CASP1,SERPINH1,NNMT,UBE2J1,HYOU1,IFITM2,HSPH1,B2M
GO:0001916	Positive regulation of T cell mediated cytotoxicity	6	28	1.33	0.91	0.00031	9606.ENSP00000259951,9606.ENSP00000364032,9606.ENSP00000378786,9606.ENSP00000379873,9606.ENSP00000429150,9606.ENSP00000497910	HLA-F,TAP2,HLA-DRA,HLA-A,FAM49B,B2M
GO:0002474	Antigen processing and presentation of peptide antigen via MHC class I	6	28	1.33	0.91	0.00031	9606.ENSP00000259951,9606.ENSP00000346206,9606.ENSP00000364032,9606.ENSP00000379873,9606.ENSP00000404833,9606.ENSP00000497910	HLA-F,TAP1,TAP2,HLA-A,TAPBP,B2M
GO:0002703	Regulation of leukocyte mediated immunity	13	239	0.74	0.72	0.00044	9606.ENSP00000259951,9606.ENSP00000349446,9606.ENSP00000364032,9606.ENSP00000364898,9606.ENSP00000370074,9606.ENSP00000376197,9606.ENSP00000378786,9606.ENSP00000379873,9606.ENSP00000380948,9606.ENSP00000391592,9606.ENSP00000429150,9606.ENSP00000496959,9606.ENSP00000497910	HLA-F,ARG1,TAP2,SYK,SERPINB9,TFRC,HLA-DRA,HLA-A,ITGB2,PTPN6,FAM49B,ITGAM,B2M
GO:1903037	Regulation of leukocyte cell-cell adhesion	16	368	0.64	0.68	0.00044	9606.ENSP00000009530,9606.ENSP00000219150,9606.ENSP00000220003,9606.ENSP00000264972,9606.ENSP00000349446,9606.ENSP00000363512,9606.ENSP00000364898,9606.ENSP00000376197,9606.ENSP00000378786,9606.ENSP00000379873,9606.ENSP00000380948,9606.ENSP00000391592,9606.ENSP00000408146,9606.ENSP00000429150,9606.ENSP00000487365,9606.ENSP00000497910	CD74,CORO1A,CSK,ZAP70,ARG1,ALOX5,SYK,TFRC,HLA-DRA,HLA-A,ITGB2,PTPN6,HLA-DPB1,FAM49B,HSPH1,B2M
GO:0030155	Regulation of cell adhesion	24	784	0.49	0.6	0.00046	9606.ENSP00000009530,9606.ENSP00000219150,9606.ENSP00000220003,9606.ENSP00000225964,9606.ENSP00000252999,9606.ENSP00000264972,9606.ENSP00000295685,9606.ENSP00000349446,9606.ENSP00000352936,9606.ENSP00000359504,9606.ENSP00000361892,9606.ENSP00000363512,9606.ENSP00000364898,9606.ENSP00000365465,9606.ENSP00000376197,9606.ENSP00000378786,9606.ENSP00000379873,9606.ENSP00000380948,9606.ENSP00000391592,…	CD74,CORO1A,CSK,COL1A1,LAMA5,ZAP70,ARPC2,ARG1,SPINK5,GBP1,STK4,ALOX5,SYK,CDSN,TFRC,HLA-DRA,HLA-A,ITGB2,PTPN6,TNXB,HLA-DPB1,FAM49B,HSPH1,B2M
GO:0002252	Immune effector process	16	375	0.63	0.66	0.00053	9606.ENSP00000009530,9606.ENSP00000219150,9606.ENSP00000225275,9606.ENSP00000243346,9606.ENSP00000252244,9606.ENSP00000258787,9606.ENSP00000349252,9606.ENSP00000364032,9606.ENSP00000364898,9606.ENSP00000370074,9606.ENSP00000379873,9606.ENSP00000381581,9606.ENSP00000391592,9606.ENSP00000395590,9606.ENSP00000429283,9606.ENSP00000497910	CD74,CORO1A,MPO,NMI,KRT1,MYO1G,ITGAL,TAP2,SYK,SERPINB9,HLA-A,LCP1,PTPN6,IFI35,DOCK2,B2M
GO:0002428	Antigen processing and presentation of peptide antigen via MHC class Ib	4	6	1.83	0.9	0.00054	9606.ENSP00000259951,9606.ENSP00000292401,9606.ENSP00000364032,9606.ENSP00000497910	HLA-F,AZGP1,TAP2,B2M
GO:0002705	Positive regulation of leukocyte mediated immunity	10	138	0.86	0.74	0.00062	9606.ENSP00000259951,9606.ENSP00000349446,9606.ENSP00000364032,9606.ENSP00000376197,9606.ENSP00000378786,9606.ENSP00000379873,9606.ENSP00000380948,9606.ENSP00000429150,9606.ENSP00000496959,9606.ENSP00000497910	HLA-F,ARG1,TAP2,TFRC,HLA-DRA,HLA-A,ITGB2,FAM49B,ITGAM,B2M
GO:0002697	Regulation of immune effector process	16	383	0.62	0.65	0.00065	9606.ENSP00000009530,9606.ENSP00000259951,9606.ENSP00000349446,9606.ENSP00000352936,9606.ENSP00000364032,9606.ENSP00000364898,9606.ENSP00000370074,9606.ENSP00000376197,9606.ENSP00000378786,9606.ENSP00000379873,9606.ENSP00000380948,9606.ENSP00000391592,9606.ENSP00000429150,9606.ENSP00000451261,9606.ENSP00000496959,9606.ENSP00000497910	CD74,HLA-F,ARG1,SPINK5,TAP2,SYK,SERPINB9,TFRC,HLA-DRA,HLA-A,ITGB2,PTPN6,FAM49B,UBE2J1,ITGAM,B2M
GO:0034097	Response to cytokine	24	804	0.48	0.58	0.00065	9606.ENSP00000009530,9606.ENSP00000216780,9606.ENSP00000219150,9606.ENSP00000225964,9606.ENSP00000243346,9606.ENSP00000271835,9606.ENSP00000301149,9606.ENSP00000302935,9606.ENSP00000304408,9606.ENSP00000315768,9606.ENSP00000333657,9606.ENSP00000349446,9606.ENSP00000354394,9606.ENSP00000357123,9606.ENSP00000359497,9606.ENSP00000359504,9606.ENSP00000360876,9606.ENSP00000364898,9606.ENSP00000371194,…	CD74,PCK2,CORO1A,COL1A1,NMI,CRNN,GPD1,IL16,COL3A1,STAT2,MX2,ARG1,STAT1,MNDA,GBP2,GBP1,IFIT3,SYK,LSP1,TFRC,MX1,PTPN6,CASP1,IFITM2
GO:0050870	Positive regulation of T cell activation	13	251	0.72	0.68	0.00065	9606.ENSP00000009530,9606.ENSP00000219150,9606.ENSP00000220003,9606.ENSP00000264972,9606.ENSP00000364898,9606.ENSP00000376197,9606.ENSP00000378786,9606.ENSP00000379873,9606.ENSP00000391592,9606.ENSP00000408146,9606.ENSP00000429150,9606.ENSP00000487365,9606.ENSP00000497910	CD74,CORO1A,CSK,ZAP70,SYK,TFRC,HLA-DRA,HLA-A,PTPN6,HLA-DPB1,FAM49B,HSPH1,B2M
GO:0002683	Negative regulation of immune system process	17	433	0.6	0.63	0.00067	9606.ENSP00000009530,9606.ENSP00000243346,9606.ENSP00000255040,9606.ENSP00000259951,9606.ENSP00000265132,9606.ENSP00000304408,9606.ENSP00000315768,9606.ENSP00000325527,9606.ENSP00000349446,9606.ENSP00000352936,9606.ENSP00000357123,9606.ENSP00000359504,9606.ENSP00000364898,9606.ENSP00000370074,9606.ENSP00000379873,9606.ENSP00000391592,9606.ENSP00000456436	CD74,NMI,APCS,HLA-F,AMBP,COL3A1,STAT2,FBN1,ARG1,SPINK5,MNDA,GBP1,SYK,SERPINB9,HLA-A,PTPN6,CNN2
GO:0002684	Positive regulation of immune system process	25	874	0.46	0.56	0.00076	9606.ENSP00000009530,9606.ENSP00000219150,9606.ENSP00000220003,9606.ENSP00000243346,9606.ENSP00000252244,9606.ENSP00000258787,9606.ENSP00000259951,9606.ENSP00000264972,9606.ENSP00000302935,9606.ENSP00000349446,9606.ENSP00000353512,9606.ENSP00000357123,9606.ENSP00000364032,9606.ENSP00000364898,9606.ENSP00000376197,9606.ENSP00000378786,9606.ENSP00000379873,9606.ENSP00000380948,9606.ENSP00000391592,…	CD74,CORO1A,CSK,NMI,KRT1,MYO1G,HLA-F,ZAP70,IL16,ARG1,PARP9,MNDA,TAP2,SYK,TFRC,HLA-DRA,HLA-A,ITGB2,PTPN6,IFI35,HLA-DPB1,FAM49B,HSPH1,ITGAM,B2M
GO:0002694	Regulation of leukocyte activation	20	601	0.52	0.58	0.00092	9606.ENSP00000009530,9606.ENSP00000219150,9606.ENSP00000220003,9606.ENSP00000259951,9606.ENSP00000264972,9606.ENSP00000302935,9606.ENSP00000349446,9606.ENSP00000352936,9606.ENSP00000357123,9606.ENSP00000364898,9606.ENSP00000376197,9606.ENSP00000378786,9606.ENSP00000379873,9606.ENSP00000380948,9606.ENSP00000391592,9606.ENSP00000408146,9606.ENSP00000429150,9606.ENSP00000487365,9606.ENSP00000496959,…	CD74,CORO1A,CSK,HLA-F,ZAP70,IL16,ARG1,SPINK5,MNDA,SYK,TFRC,HLA-DRA,HLA-A,ITGB2,PTPN6,HLA-DPB1,FAM49B,HSPH1,ITGAM,B2M
GO:0070887	Cellular response to chemical stimulus	50	2609	0.28	0.47	0.00092	9606.ENSP00000009530,9606.ENSP00000216780,9606.ENSP00000219150,9606.ENSP00000220003,9606.ENSP00000222271,9606.ENSP00000225275,9606.ENSP00000225964,9606.ENSP00000243346,9606.ENSP00000261883,9606.ENSP00000265132,9606.ENSP00000271835,9606.ENSP00000281938,9606.ENSP00000297268,9606.ENSP00000299767,9606.ENSP00000300026,9606.ENSP00000301149,9606.ENSP00000302935,9606.ENSP00000304408,9606.ENSP00000307260,…	CD74,PCK2,CORO1A,CSK,COMP,MPO,COL1A1,NMI,CILP,AMBP,CRNN,HSPB8,COL1A2,HSP90B1,PPIB,GPD1,IL16,COL3A1,TBL2,STAT2,FBN1,MAPT,ARG1,DNMT1,MSN,STAT1,ZNF277,COL6A1,MNDA,CTSS,GBP2,GBP1,IFIT3,ALOX5,COL5A2,SYK,CYBB,SERPINB9,LSP1,SOD3,GPX3,TFRC,ITGB2,MX1,PTPN6,FBP1,CASP1,HYOU1,IFITM2,B2M
GO:0071345	Cellular response to cytokine stimulus	22	711	0.49	0.57	0.00092	9606.ENSP00000009530,9606.ENSP00000216780,9606.ENSP00000219150,9606.ENSP00000225964,9606.ENSP00000243346,9606.ENSP00000271835,9606.ENSP00000301149,9606.ENSP00000302935,9606.ENSP00000315768,9606.ENSP00000349446,9606.ENSP00000354394,9606.ENSP00000357123,9606.ENSP00000359497,9606.ENSP00000359504,9606.ENSP00000360876,9606.ENSP00000364898,9606.ENSP00000371194,9606.ENSP00000376197,9606.ENSP00000381601,…	CD74,PCK2,CORO1A,COL1A1,NMI,CRNN,GPD1,IL16,STAT2,ARG1,STAT1,MNDA,GBP2,GBP1,IFIT3,SYK,LSP1,TFRC,MX1,PTPN6,CASP1,IFITM2
GO:0002699	Positive regulation of immune effector process	13	264	0.69	0.65	0.00097	9606.ENSP00000009530,9606.ENSP00000259951,9606.ENSP00000349446,9606.ENSP00000364032,9606.ENSP00000364898,9606.ENSP00000376197,9606.ENSP00000378786,9606.ENSP00000379873,9606.ENSP00000380948,9606.ENSP00000391592,9606.ENSP00000429150,9606.ENSP00000496959,9606.ENSP00000497910	CD74,HLA-F,ARG1,TAP2,SYK,TFRC,HLA-DRA,HLA-A,ITGB2,PTPN6,FAM49B,ITGAM,B2M
GO:0050777	Negative regulation of immune response	11	185	0.78	0.67	0.00099	9606.ENSP00000243346,9606.ENSP00000259951,9606.ENSP00000265132,9606.ENSP00000304408,9606.ENSP00000315768,9606.ENSP00000349446,9606.ENSP00000352936,9606.ENSP00000364898,9606.ENSP00000370074,9606.ENSP00000379873,9606.ENSP00000391592	NMI,HLA-F,AMBP,COL3A1,STAT2,ARG1,SPINK5,SYK,SERPINB9,HLA-A,PTPN6
GO:0009615	Response to virus	15	356	0.63	0.62	0.0010	9606.ENSP00000243346,9606.ENSP00000296161,9606.ENSP00000315768,9606.ENSP00000327459,9606.ENSP00000333657,9606.ENSP00000353512,9606.ENSP00000354394,9606.ENSP00000359504,9606.ENSP00000360876,9606.ENSP00000369299,9606.ENSP00000381601,9606.ENSP00000410452,9606.ENSP00000432660,9606.ENSP00000433138,9606.ENSP00000484689	NMI,DTX3L,STAT2,APOBEC3B,MX2,PARP9,STAT1,GBP1,IFIT3,TRIM22,MX1,STMN1,CFL1,CASP1,IFITM2
GO:0045104	Intermediate filament cytoskeleton organization	8	88	0.96	0.71	0.0012	9606.ENSP00000246635,9606.ENSP00000252244,9606.ENSP00000263946,9606.ENSP00000306261,9606.ENSP00000330101,9606.ENSP00000340510,9606.ENSP00000369129,9606.ENSP00000413479	KRT13,KRT1,PKP1,KRT78,KRT76,PPL,DSP,KRT3
GO:0001817	Regulation of cytokine production	22	739	0.48	0.54	0.0014	9606.ENSP00000009530,9606.ENSP00000220003,9606.ENSP00000243346,9606.ENSP00000259951,9606.ENSP00000266718,9606.ENSP00000302935,9606.ENSP00000310036,9606.ENSP00000349446,9606.ENSP00000354394,9606.ENSP00000357123,9606.ENSP00000359504,9606.ENSP00000363512,9606.ENSP00000364898,9606.ENSP00000367851,9606.ENSP00000374274,9606.ENSP00000379873,9606.ENSP00000391592,9606.ENSP00000408146,9606.ENSP00000429150,…	CD74,CSK,NMI,HLA-F,LUM,IL16,CD34,ARG1,STAT1,MNDA,GBP1,ALOX5,SYK,CYBB,SSC5D,HLA-A,PTPN6,HLA-DPB1,FAM49B,CASP1,UBE2J1,B2M
GO:0007010	Cytoskeleton organization	30	1229	0.39	0.5	0.0014	9606.ENSP00000219150,9606.ENSP00000245932,9606.ENSP00000246635,9606.ENSP00000252244,9606.ENSP00000258787,9606.ENSP00000261366,9606.ENSP00000263946,9606.ENSP00000295685,9606.ENSP00000299767,9606.ENSP00000306261,9606.ENSP00000324511,9606.ENSP00000329219,9606.ENSP00000330101,9606.ENSP00000340510,9606.ENSP00000340820,9606.ENSP00000351807,9606.ENSP00000353408,9606.ENSP00000369129,9606.ENSP00000376132,…	CORO1A,VASP,KRT13,KRT1,MYO1G,LMNB1,PKP1,ARPC2,HSP90B1,KRT78,SEPTIN1,FMNL1,KRT76,PPL,MAPT,ELN,MSN,DSP,MYO1B,LIMA1,LCP1,ARPC1B,TNXB,STMN1,KRT3,DOCK2,CFL1,CKAP5,CNN2,MYO1F
GO:0016043	Cellular component organization	83	5436	0.19	0.41	0.0016	9606.ENSP00000009530,9606.ENSP00000219150,9606.ENSP00000220003,9606.ENSP00000222271,9606.ENSP00000225275,9606.ENSP00000225964,9606.ENSP00000244534,9606.ENSP00000245932,9606.ENSP00000246635,9606.ENSP00000252244,9606.ENSP00000252999,9606.ENSP00000253107,9606.ENSP00000255040,9606.ENSP00000257192,9606.ENSP00000258787,9606.ENSP00000261366,9606.ENSP00000261483,9606.ENSP00000262428,9606.ENSP00000263946,…	CD74,CORO1A,CSK,COMP,MPO,COL1A1,H1-3,VASP,KRT13,KRT1,LAMA5,PPAN,APCS,DSG1,MYO1G,LMNB1,MAN2A1,COTL1,PKP1,LUM,KRT10,ARPC2,DTX3L,COL1A2,HSP90B1,COL3A1,KRT78,CD34,SEPTIN1,PPP1CA,FMNL1,H1-5,KRT76,IKZF1,PPL,MAPT,SEPTIN6,DMKN,COL6A6,ELN,DNMT1,SPINK5,MSN,COLGALT2,H3-4,HRNR,CTSS,SLC25A5,COL5A1,SURF4,STK4,DNAJC9,HSD17B8,COL5A2,DSP,TGM3,MYO1B,LIMA1,HLA-DRA,TYMP,ITGB2,LCP1,ARPC1B,SLC12A4,TAPBP,TNXB,HLA-DPB1,…
GO:0032964	Collagen biosynthetic process	4	10	1.6	0.75	0.0018	9606.ENSP00000225964,9606.ENSP00000349446,9606.ENSP00000360882,9606.ENSP00000434412	COL1A1,ARG1,COL5A1,SERPINH1
GO:0048513	Animal organ development	57	3246	0.25	0.43	0.0018	9606.ENSP00000009530,9606.ENSP00000052754,9606.ENSP00000216780,9606.ENSP00000220003,9606.ENSP00000222271,9606.ENSP00000225964,9606.ENSP00000236040,9606.ENSP00000252244,9606.ENSP00000252999,9606.ENSP00000261483,9606.ENSP00000264474,9606.ENSP00000264972,9606.ENSP00000269576,9606.ENSP00000295550,9606.ENSP00000297268,9606.ENSP00000300026,9606.ENSP00000302579,9606.ENSP00000304408,9606.ENSP00000306261,…	CD74,DCN,PCK2,CSK,COMP,COL1A1,P3H1,KRT1,LAMA5,MAN2A1,CSTA,ZAP70,KRT10,COL6A3,COL1A2,PPIB,SCEL,COL3A1,KRT78,CD34,FBN1,PPP1CA,BGN,H1-5,KRT76,IKZF1,PPL,SH3PXD2A,ARG1,ELN,MSN,STAT1,FLG,HRNR,ECM1,SLC25A5,COL5A1,STK4,COL5A2,SYK,CDSN,DSP,TGM3,FLG2,TFRC,LCP1,PTPN6,STMN1,KRT3,DOCK2,SERPINH1,NNMT,SCO2,CNN2,MTHFD1L,ITGAM,B2M
GO:0050863	Regulation of T cell activation	15	376	0.6	0.57	0.0018	9606.ENSP00000009530,9606.ENSP00000219150,9606.ENSP00000220003,9606.ENSP00000264972,9606.ENSP00000349446,9606.ENSP00000352936,9606.ENSP00000364898,9606.ENSP00000376197,9606.ENSP00000378786,9606.ENSP00000379873,9606.ENSP00000391592,9606.ENSP00000408146,9606.ENSP00000429150,9606.ENSP00000487365,9606.ENSP00000497910	CD74,CORO1A,CSK,ZAP70,ARG1,SPINK5,SYK,TFRC,HLA-DRA,HLA-A,PTPN6,HLA-DPB1,FAM49B,HSPH1,B2M
GO:0071310	Cellular response to organic substance	41	2019	0.31	0.46	0.0018	9606.ENSP00000009530,9606.ENSP00000216780,9606.ENSP00000219150,9606.ENSP00000220003,9606.ENSP00000222271,9606.ENSP00000225964,9606.ENSP00000243346,9606.ENSP00000261883,9606.ENSP00000271835,9606.ENSP00000281938,9606.ENSP00000297268,9606.ENSP00000299767,9606.ENSP00000301149,9606.ENSP00000302935,9606.ENSP00000304408,9606.ENSP00000307260,9606.ENSP00000315768,9606.ENSP00000325527,9606.ENSP00000340820,…	CD74,PCK2,CORO1A,CSK,COMP,COL1A1,NMI,CILP,CRNN,HSPB8,COL1A2,HSP90B1,GPD1,IL16,COL3A1,TBL2,STAT2,FBN1,MAPT,ARG1,DNMT1,MSN,STAT1,COL6A1,MNDA,CTSS,GBP2,GBP1,IFIT3,COL5A2,SYK,CYBB,SERPINB9,LSP1,TFRC,MX1,PTPN6,FBP1,CASP1,IFITM2,B2M
GO:0071840	Cellular component organization or biogenesis	85	5639	0.18	0.4	0.0018	9606.ENSP00000009530,9606.ENSP00000219150,9606.ENSP00000220003,9606.ENSP00000222271,9606.ENSP00000225275,9606.ENSP00000225964,9606.ENSP00000244534,9606.ENSP00000245932,9606.ENSP00000246635,9606.ENSP00000252244,9606.ENSP00000252999,9606.ENSP00000253107,9606.ENSP00000255040,9606.ENSP00000257192,9606.ENSP00000258787,9606.ENSP00000261366,9606.ENSP00000261483,9606.ENSP00000262428,9606.ENSP00000263946,…	CD74,CORO1A,CSK,COMP,MPO,COL1A1,H1-3,VASP,KRT13,KRT1,LAMA5,PPAN,APCS,DSG1,MYO1G,LMNB1,MAN2A1,COTL1,PKP1,LUM,KRT10,ARPC2,DTX3L,COL1A2,HSP90B1,COL3A1,KRT78,CD34,SEPTIN1,PPP1CA,FMNL1,H1-5,KRT76,IKZF1,PPL,MAPT,SEPTIN6,DMKN,COL6A6,ELN,DNMT1,SPINK5,MSN,COLGALT2,H3-4,HRNR,CTSS,SLC25A5,COL5A1,SURF4,STK4,DNAJC9,HSD17B8,COL5A2,DSP,TGM3,MYO1B,LIMA1,HLA-DRA,TYMP,ITGB2,LCP1,ARPC1B,SLC12A4,TAPBP,TNXB,HLA-DPB1,…
GO:0022407	Regulation of cell-cell adhesion	17	480	0.55	0.55	0.0019	9606.ENSP00000009530,9606.ENSP00000219150,9606.ENSP00000220003,9606.ENSP00000264972,9606.ENSP00000349446,9606.ENSP00000363512,9606.ENSP00000364898,9606.ENSP00000365465,9606.ENSP00000376197,9606.ENSP00000378786,9606.ENSP00000379873,9606.ENSP00000380948,9606.ENSP00000391592,9606.ENSP00000408146,9606.ENSP00000429150,9606.ENSP00000487365,9606.ENSP00000497910	CD74,CORO1A,CSK,ZAP70,ARG1,ALOX5,SYK,CDSN,TFRC,HLA-DRA,HLA-A,ITGB2,PTPN6,HLA-DPB1,FAM49B,HSPH1,B2M
GO:0045109	Intermediate filament organization	7	69	1.01	0.67	0.0020	9606.ENSP00000246635,9606.ENSP00000252244,9606.ENSP00000263946,9606.ENSP00000306261,9606.ENSP00000330101,9606.ENSP00000369129,9606.ENSP00000413479	KRT13,KRT1,PKP1,KRT78,KRT76,DSP,KRT3
GO:0045785	Positive regulation of cell adhesion	17	485	0.55	0.54	0.0021	9606.ENSP00000009530,9606.ENSP00000219150,9606.ENSP00000220003,9606.ENSP00000264972,9606.ENSP00000295685,9606.ENSP00000361892,9606.ENSP00000363512,9606.ENSP00000364898,9606.ENSP00000376197,9606.ENSP00000378786,9606.ENSP00000379873,9606.ENSP00000380948,9606.ENSP00000391592,9606.ENSP00000408146,9606.ENSP00000429150,9606.ENSP00000487365,9606.ENSP00000497910	CD74,CORO1A,CSK,ZAP70,ARPC2,STK4,ALOX5,SYK,TFRC,HLA-DRA,HLA-A,ITGB2,PTPN6,HLA-DPB1,FAM49B,HSPH1,B2M
GO:0051251	Positive regulation of lymphocyte activation	14	336	0.62	0.57	0.0021	9606.ENSP00000009530,9606.ENSP00000219150,9606.ENSP00000220003,9606.ENSP00000259951,9606.ENSP00000264972,9606.ENSP00000364898,9606.ENSP00000376197,9606.ENSP00000378786,9606.ENSP00000379873,9606.ENSP00000391592,9606.ENSP00000408146,9606.ENSP00000429150,9606.ENSP00000487365,9606.ENSP00000497910	CD74,CORO1A,CSK,HLA-F,ZAP70,SYK,TFRC,HLA-DRA,HLA-A,PTPN6,HLA-DPB1,FAM49B,HSPH1,B2M
GO:0050900	Leukocyte migration	12	249	0.69	0.58	0.0022	9606.ENSP00000219150,9606.ENSP00000258787,9606.ENSP00000264972,9606.ENSP00000300026,9606.ENSP00000302935,9606.ENSP00000310036,9606.ENSP00000349252,9606.ENSP00000353408,9606.ENSP00000363512,9606.ENSP00000364898,9606.ENSP00000380948,9606.ENSP00000456436	CORO1A,MYO1G,ZAP70,PPIB,IL16,CD34,ITGAL,MSN,ALOX5,SYK,ITGB2,CNN2
GO:0098609	Cell-cell adhesion	18	542	0.52	0.53	0.0022	9606.ENSP00000222271,9606.ENSP00000252999,9606.ENSP00000257192,9606.ENSP00000263946,9606.ENSP00000264474,9606.ENSP00000264972,9606.ENSP00000271835,9606.ENSP00000310036,9606.ENSP00000326031,9606.ENSP00000349252,9606.ENSP00000353408,9606.ENSP00000364898,9606.ENSP00000365465,9606.ENSP00000369129,9606.ENSP00000380948,9606.ENSP00000391592,9606.ENSP00000407685,9606.ENSP00000496959	COMP,LAMA5,DSG1,PKP1,CSTA,ZAP70,CRNN,CD34,PPP1CA,ITGAL,MSN,SYK,CDSN,DSP,ITGB2,PTPN6,TNXB,ITGAM
GO:0051607	Defense response to virus	12	252	0.68	0.58	0.0024	9606.ENSP00000296161,9606.ENSP00000315768,9606.ENSP00000327459,9606.ENSP00000333657,9606.ENSP00000353512,9606.ENSP00000354394,9606.ENSP00000359504,9606.ENSP00000360876,9606.ENSP00000369299,9606.ENSP00000381601,9606.ENSP00000433138,9606.ENSP00000484689	DTX3L,STAT2,APOBEC3B,MX2,PARP9,STAT1,GBP1,IFIT3,TRIM22,MX1,CASP1,IFITM2
GO:0002706	Regulation of lymphocyte mediated immunity	10	176	0.76	0.58	0.0030	9606.ENSP00000259951,9606.ENSP00000349446,9606.ENSP00000364032,9606.ENSP00000370074,9606.ENSP00000376197,9606.ENSP00000378786,9606.ENSP00000379873,9606.ENSP00000391592,9606.ENSP00000429150,9606.ENSP00000497910	HLA-F,ARG1,TAP2,SERPINB9,TFRC,HLA-DRA,HLA-A,PTPN6,FAM49B,B2M
GO:0061436	Establishment of skin barrier	5	28	1.25	0.66	0.0030	9606.ENSP00000252244,9606.ENSP00000357789,9606.ENSP00000357791,9606.ENSP00000373370,9606.ENSP00000410452	KRT1,FLG,HRNR,FLG2,STMN1
GO:0065007	Biological regulation	151	12385	0.09	0.35	0.0030	9606.ENSP00000009530,9606.ENSP00000052754,9606.ENSP00000188790,9606.ENSP00000205636,9606.ENSP00000216780,9606.ENSP00000216802,9606.ENSP00000219150,9606.ENSP00000220003,9606.ENSP00000222271,9606.ENSP00000225275,9606.ENSP00000225964,9606.ENSP00000225972,9606.ENSP00000228945,9606.ENSP00000236040,9606.ENSP00000242786,9606.ENSP00000243346,9606.ENSP00000244333,9606.ENSP00000244534,9606.ENSP00000245932,…	CD74,DCN,FAP,CMTM6,PCK2,PSME2,CORO1A,CSK,COMP,MPO,COL1A1,LRRC59,ARHGDIB,P3H1,ADGRE5,NMI,LYPD3,H1-3,VASP,KRT13,KRT1,LAMA5,RBM39,APCS,DSG1,MYO1G,HLA-F,LMNB1,MAN2A1,CILP,COTL1,LCN1,PKP1,CSTA,ZAP70,AMBP,LUM,SERPINB13,KRT10,CRNN,HSPB8,AZGP1,COL6A3,ARPC2,DTX3L,COL1A2,HSP90B1,PPIB,JSRP1,GPD1,SCEL,IL16,COL3A1,TBL2,CD34,AOC3,STAT2,OLFML3,SEPTIN1,FBN1,PPP1CA,APOBEC3B,FMNL1,H1-5,IKZF1,COL7A1,OLFML1,MX2,ARHG…
GO:0071230	Cellular response to amino acid stimulus	7	76	0.97	0.62	0.0031	9606.ENSP00000225964,9606.ENSP00000297268,9606.ENSP00000304408,9606.ENSP00000352516,9606.ENSP00000355180,9606.ENSP00000364000,9606.ENSP00000367851	COL1A1,COL1A2,COL3A1,DNMT1,COL6A1,COL5A2,CYBB
GO:0030855	Epithelial cell differentiation	19	617	0.49	0.5	0.0032	9606.ENSP00000216780,9606.ENSP00000246635,9606.ENSP00000252244,9606.ENSP00000264474,9606.ENSP00000269576,9606.ENSP00000302579,9606.ENSP00000306261,9606.ENSP00000310036,9606.ENSP00000330101,9606.ENSP00000340510,9606.ENSP00000352936,9606.ENSP00000353408,9606.ENSP00000357789,9606.ENSP00000357791,9606.ENSP00000361892,9606.ENSP00000365465,9606.ENSP00000369129,9606.ENSP00000370867,9606.ENSP00000413479	PCK2,KRT13,KRT1,CSTA,KRT10,SCEL,KRT78,CD34,KRT76,PPL,SPINK5,MSN,FLG,HRNR,STK4,CDSN,DSP,TGM3,KRT3
GO:0051249	Regulation of lymphocyte activation	17	508	0.53	0.51	0.0032	9606.ENSP00000009530,9606.ENSP00000219150,9606.ENSP00000220003,9606.ENSP00000259951,9606.ENSP00000264972,9606.ENSP00000349446,9606.ENSP00000352936,9606.ENSP00000357123,9606.ENSP00000364898,9606.ENSP00000376197,9606.ENSP00000378786,9606.ENSP00000379873,9606.ENSP00000391592,9606.ENSP00000408146,9606.ENSP00000429150,9606.ENSP00000487365,9606.ENSP00000497910	CD74,CORO1A,CSK,HLA-F,ZAP70,ARG1,SPINK5,MNDA,SYK,TFRC,HLA-DRA,HLA-A,PTPN6,HLA-DPB1,FAM49B,HSPH1,B2M
GO:0019886	Antigen processing and presentation of exogenous peptide antigen via MHC class II	5	29	1.24	0.65	0.0033	9606.ENSP00000009530,9606.ENSP00000357981,9606.ENSP00000378786,9606.ENSP00000408146,9606.ENSP00000497910	CD74,CTSS,HLA-DRA,HLA-DPB1,B2M
GO:0002831	Regulation of response to biotic stimulus	14	361	0.59	0.52	0.0037	9606.ENSP00000243346,9606.ENSP00000259951,9606.ENSP00000296161,9606.ENSP00000315768,9606.ENSP00000349446,9606.ENSP00000352936,9606.ENSP00000353512,9606.ENSP00000354394,9606.ENSP00000357123,9606.ENSP00000364898,9606.ENSP00000370074,9606.ENSP00000379873,9606.ENSP00000391592,9606.ENSP00000395590	NMI,HLA-F,DTX3L,STAT2,ARG1,SPINK5,PARP9,STAT1,MNDA,SYK,SERPINB9,HLA-A,PTPN6,IFI35
GO:0043254	Regulation of protein-containing complex assembly	15	413	0.56	0.51	0.0039	9606.ENSP00000219150,9606.ENSP00000245932,9606.ENSP00000262428,9606.ENSP00000295685,9606.ENSP00000340820,9606.ENSP00000347495,9606.ENSP00000351807,9606.ENSP00000353408,9606.ENSP00000364898,9606.ENSP00000376197,9606.ENSP00000381581,9606.ENSP00000389631,9606.ENSP00000410452,9606.ENSP00000429150,9606.ENSP00000432768	CORO1A,VASP,COTL1,ARPC2,MAPT,WARS1,ELN,MSN,SYK,TFRC,LCP1,ARPC1B,STMN1,FAM49B,CKAP5
GO:0045321	Leukocyte activation	18	574	0.5	0.49	0.0040	9606.ENSP00000009530,9606.ENSP00000219150,9606.ENSP00000243346,9606.ENSP00000264972,9606.ENSP00000331614,9606.ENSP00000340820,9606.ENSP00000349252,9606.ENSP00000353408,9606.ENSP00000360671,9606.ENSP00000364898,9606.ENSP00000379873,9606.ENSP00000380948,9606.ENSP00000381581,9606.ENSP00000391592,9606.ENSP00000395590,9606.ENSP00000429283,9606.ENSP00000496959,9606.ENSP00000497910	CD74,CORO1A,NMI,ZAP70,IKZF1,MAPT,ITGAL,MSN,SLC25A5,SYK,HLA-A,ITGB2,LCP1,PTPN6,IFI35,DOCK2,ITGAM,B2M
GO:0001775	Cell activation	20	693	0.46	0.47	0.0043	9606.ENSP00000009530,9606.ENSP00000219150,9606.ENSP00000222271,9606.ENSP00000243346,9606.ENSP00000264972,9606.ENSP00000304408,9606.ENSP00000331614,9606.ENSP00000340820,9606.ENSP00000349252,9606.ENSP00000353408,9606.ENSP00000360671,9606.ENSP00000364898,9606.ENSP00000379873,9606.ENSP00000380948,9606.ENSP00000381581,9606.ENSP00000391592,9606.ENSP00000395590,9606.ENSP00000429283,9606.ENSP00000496959,…	CD74,CORO1A,COMP,NMI,ZAP70,COL3A1,IKZF1,MAPT,ITGAL,MSN,SLC25A5,SYK,HLA-A,ITGB2,LCP1,PTPN6,IFI35,DOCK2,ITGAM,B2M
GO:0007015	Actin filament organization	12	274	0.64	0.52	0.0045	9606.ENSP00000219150,9606.ENSP00000245932,9606.ENSP00000258787,9606.ENSP00000295685,9606.ENSP00000299767,9606.ENSP00000351807,9606.ENSP00000376132,9606.ENSP00000378400,9606.ENSP00000381581,9606.ENSP00000389631,9606.ENSP00000432660,9606.ENSP00000494550	CORO1A,VASP,MYO1G,ARPC2,HSP90B1,ELN,MYO1B,LIMA1,LCP1,ARPC1B,CFL1,MYO1F
GO:0031347	Regulation of defense response	19	638	0.48	0.47	0.0045	9606.ENSP00000243346,9606.ENSP00000252244,9606.ENSP00000255040,9606.ENSP00000259951,9606.ENSP00000296161,9606.ENSP00000302935,9606.ENSP00000315768,9606.ENSP00000349446,9606.ENSP00000352936,9606.ENSP00000353512,9606.ENSP00000354394,9606.ENSP00000357123,9606.ENSP00000363512,9606.ENSP00000364898,9606.ENSP00000370074,9606.ENSP00000379873,9606.ENSP00000391592,9606.ENSP00000395590,9606.ENSP00000433138	NMI,KRT1,APCS,HLA-F,DTX3L,IL16,STAT2,ARG1,SPINK5,PARP9,STAT1,MNDA,ALOX5,SYK,SERPINB9,HLA-A,PTPN6,IFI35,CASP1
GO:0060429	Epithelium development	26	1069	0.39	0.44	0.0045	9606.ENSP00000216780,9606.ENSP00000245932,9606.ENSP00000246635,9606.ENSP00000252244,9606.ENSP00000252999,9606.ENSP00000264474,9606.ENSP00000269576,9606.ENSP00000302579,9606.ENSP00000306261,9606.ENSP00000310036,9606.ENSP00000326031,9606.ENSP00000330101,9606.ENSP00000340510,9606.ENSP00000352936,9606.ENSP00000353408,9606.ENSP00000354394,9606.ENSP00000357789,9606.ENSP00000357791,9606.ENSP00000360882,…	PCK2,VASP,KRT13,KRT1,LAMA5,CSTA,KRT10,SCEL,KRT78,CD34,PPP1CA,KRT76,PPL,SPINK5,MSN,STAT1,FLG,HRNR,COL5A1,STK4,CDSN,DSP,TGM3,FLG2,KRT3,MTHFD1L
GO:0031348	Negative regulation of defense response	11	232	0.68	0.53	0.0046	9606.ENSP00000243346,9606.ENSP00000252244,9606.ENSP00000255040,9606.ENSP00000259951,9606.ENSP00000315768,9606.ENSP00000349446,9606.ENSP00000352936,9606.ENSP00000363512,9606.ENSP00000364898,9606.ENSP00000370074,9606.ENSP00000379873	NMI,KRT1,APCS,HLA-F,STAT2,ARG1,SPINK5,ALOX5,SYK,SERPINB9,HLA-A
GO:0031424	Keratinization	7	83	0.93	0.58	0.0046	9606.ENSP00000252244,9606.ENSP00000306261,9606.ENSP00000330101,9606.ENSP00000340510,9606.ENSP00000357791,9606.ENSP00000370867,9606.ENSP00000413479	KRT1,KRT78,KRT76,PPL,HRNR,TGM3,KRT3
GO:0002477	Antigen processing and presentation of exogenous peptide antigen via MHC class Ib	3	4	1.88	0.65	0.0047	9606.ENSP00000259951,9606.ENSP00000364032,9606.ENSP00000497910	HLA-F,TAP2,B2M
GO:1902563	Regulation of neutrophil activation	4	15	1.43	0.63	0.0047	9606.ENSP00000302935,9606.ENSP00000364898,9606.ENSP00000380948,9606.ENSP00000496959	IL16,SYK,ITGB2,ITGAM
GO:0043200	Response to amino acid	8	117	0.84	0.55	0.0049	9606.ENSP00000225964,9606.ENSP00000297268,9606.ENSP00000304408,9606.ENSP00000349446,9606.ENSP00000352516,9606.ENSP00000355180,9606.ENSP00000364000,9606.ENSP00000367851	COL1A1,COL1A2,COL3A1,ARG1,DNMT1,COL6A1,COL5A2,CYBB
GO:0002709	Regulation of T cell mediated immunity	7	86	0.91	0.56	0.0053	9606.ENSP00000259951,9606.ENSP00000349446,9606.ENSP00000364032,9606.ENSP00000378786,9606.ENSP00000379873,9606.ENSP00000429150,9606.ENSP00000497910	HLA-F,ARG1,TAP2,HLA-DRA,HLA-A,FAM49B,B2M
GO:0031589	Cell-substrate adhesion	10	195	0.71	0.52	0.0053	9606.ENSP00000219150,9606.ENSP00000244333,9606.ENSP00000252999,9606.ENSP00000258787,9606.ENSP00000304408,9606.ENSP00000310036,9606.ENSP00000349252,9606.ENSP00000380948,9606.ENSP00000407685,9606.ENSP00000496959	CORO1A,LYPD3,LAMA5,MYO1G,COL3A1,CD34,ITGAL,ITGB2,TNXB,ITGAM
GO:0045088	Regulation of innate immune response	11	238	0.67	0.51	0.0053	9606.ENSP00000243346,9606.ENSP00000259951,9606.ENSP00000315768,9606.ENSP00000349446,9606.ENSP00000353512,9606.ENSP00000357123,9606.ENSP00000364898,9606.ENSP00000370074,9606.ENSP00000379873,9606.ENSP00000391592,9606.ENSP00000395590	NMI,HLA-F,STAT2,ARG1,PARP9,MNDA,SYK,SERPINB9,HLA-A,PTPN6,IFI35
GO:0048519	Negative regulation of biological process	79	5313	0.17	0.36	0.0054	9606.ENSP00000009530,9606.ENSP00000052754,9606.ENSP00000188790,9606.ENSP00000219150,9606.ENSP00000220003,9606.ENSP00000222271,9606.ENSP00000225275,9606.ENSP00000225964,9606.ENSP00000228945,9606.ENSP00000236040,9606.ENSP00000243346,9606.ENSP00000244333,9606.ENSP00000244534,9606.ENSP00000252244,9606.ENSP00000255040,9606.ENSP00000259951,9606.ENSP00000261366,9606.ENSP00000261883,9606.ENSP00000263598,…	CD74,DCN,FAP,CORO1A,CSK,COMP,MPO,COL1A1,ARHGDIB,P3H1,NMI,LYPD3,H1-3,KRT1,APCS,HLA-F,LMNB1,CILP,LCN1,PKP1,CSTA,AMBP,SERPINB13,AZGP1,COL6A3,DTX3L,HSP90B1,COL3A1,CD34,STAT2,FBN1,APOBEC3B,H1-5,IKZF1,COL7A1,ACSL4,MAPT,WARS1,ARG1,DNMT1,SPINK5,PARP9,STAT1,MNDA,ECM1,GBP1,SLC25A5,IFIT3,COL5A1,STK4,ALOX5,COL5A2,SYK,CDSN,TXNDC5,TRIM22,SERPINB9,SSC5D,TFRC,ASNS,LIMA1,HLA-A,ITGB2,MX1,PTPN6,IFI35,FBP1,STMN1,FAM…
GO:0032101	Regulation of response to external stimulus	24	964	0.4	0.43	0.0058	9606.ENSP00000009530,9606.ENSP00000188790,9606.ENSP00000243346,9606.ENSP00000252244,9606.ENSP00000255040,9606.ENSP00000259951,9606.ENSP00000296161,9606.ENSP00000302935,9606.ENSP00000310036,9606.ENSP00000315768,9606.ENSP00000325527,9606.ENSP00000349446,9606.ENSP00000352936,9606.ENSP00000353512,9606.ENSP00000354394,9606.ENSP00000357123,9606.ENSP00000363512,9606.ENSP00000364898,9606.ENSP00000370074,…	CD74,FAP,NMI,KRT1,APCS,HLA-F,DTX3L,IL16,CD34,STAT2,FBN1,ARG1,SPINK5,PARP9,STAT1,MNDA,ALOX5,SYK,SERPINB9,HLA-A,PTPN6,IFI35,FAM49B,CASP1
GO:0072678	T cell migration	5	35	1.16	0.58	0.0059	9606.ENSP00000219150,9606.ENSP00000258787,9606.ENSP00000264972,9606.ENSP00000349252,9606.ENSP00000353408	CORO1A,MYO1G,ZAP70,ITGAL,MSN
GO:0002476	Antigen processing and presentation of endogenous peptide antigen via MHC class Ib	3	5	1.78	0.6	0.0068	9606.ENSP00000259951,9606.ENSP00000292401,9606.ENSP00000364032	HLA-F,AZGP1,TAP2
GO:0032271	Regulation of protein polymerization	10	204	0.69	0.49	0.0072	9606.ENSP00000219150,9606.ENSP00000245932,9606.ENSP00000262428,9606.ENSP00000295685,9606.ENSP00000340820,9606.ENSP00000351807,9606.ENSP00000389631,9606.ENSP00000410452,9606.ENSP00000429150,9606.ENSP00000432768	CORO1A,VASP,COTL1,ARPC2,MAPT,ELN,ARPC1B,STMN1,FAM49B,CKAP5
GO:0042116	Macrophage activation	6	62	0.99	0.54	0.0074	9606.ENSP00000243346,9606.ENSP00000340820,9606.ENSP00000364898,9606.ENSP00000380948,9606.ENSP00000395590,9606.ENSP00000496959	NMI,MAPT,SYK,ITGB2,IFI35,ITGAM
GO:0051259	Protein complex oligomerization	11	253	0.64	0.47	0.0085	9606.ENSP00000009530,9606.ENSP00000222271,9606.ENSP00000245932,9606.ENSP00000252244,9606.ENSP00000269576,9606.ENSP00000297268,9606.ENSP00000340820,9606.ENSP00000361892,9606.ENSP00000363794,9606.ENSP00000444408,9606.ENSP00000497910	CD74,COMP,VASP,KRT1,KRT10,COL1A2,MAPT,STK4,HSD17B8,SLC1A5,B2M
GO:0002501	Peptide antigen assembly with MHC protein complex	4	19	1.33	0.55	0.0091	9606.ENSP00000378786,9606.ENSP00000404833,9606.ENSP00000408146,9606.ENSP00000497910	HLA-DRA,TAPBP,HLA-DPB1,B2M
GO:0006457	Protein folding	10	215	0.67	0.46	0.0104	9606.ENSP00000009530,9606.ENSP00000236040,9606.ENSP00000255040,9606.ENSP00000299767,9606.ENSP00000300026,9606.ENSP00000369081,9606.ENSP00000480150,9606.ENSP00000487365,9606.ENSP00000497910,9606.ENSP00000499129	CD74,P3H1,APCS,HSP90B1,PPIB,TXNDC5,HYOU1,HSPH1,B2M,PDIA4
GO:0032930	Positive regulation of superoxide anion generation	4	20	1.3	0.53	0.0104	9606.ENSP00000340820,9606.ENSP00000364898,9606.ENSP00000380948,9606.ENSP00000496959	MAPT,SYK,ITGB2,ITGAM
GO:0002250	Adaptive immune response	13	359	0.56	0.43	0.0107	9606.ENSP00000009530,9606.ENSP00000220003,9606.ENSP00000258787,9606.ENSP00000264972,9606.ENSP00000346206,9606.ENSP00000349446,9606.ENSP00000357981,9606.ENSP00000364032,9606.ENSP00000364898,9606.ENSP00000378786,9606.ENSP00000379873,9606.ENSP00000408146,9606.ENSP00000497910	CD74,CSK,MYO1G,ZAP70,TAP1,ARG1,CTSS,TAP2,SYK,HLA-DRA,HLA-A,HLA-DPB1,B2M
GO:0002822	Regulation of adaptive immune response based on somatic recombination of immune receptors built from immunoglobulin superfamily domains	9	179	0.7	0.45	0.0131	9606.ENSP00000259951,9606.ENSP00000349446,9606.ENSP00000364032,9606.ENSP00000376197,9606.ENSP00000378786,9606.ENSP00000379873,9606.ENSP00000391592,9606.ENSP00000429150,9606.ENSP00000497910	HLA-F,ARG1,TAP2,TFRC,HLA-DRA,HLA-A,PTPN6,FAM49B,B2M
GO:1902565	Positive regulation of neutrophil activation	3	7	1.63	0.52	0.0132	9606.ENSP00000302935,9606.ENSP00000380948,9606.ENSP00000496959	IL16,ITGB2,ITGAM
GO:0032535	Regulation of cellular component size	13	370	0.55	0.41	0.0140	9606.ENSP00000219150,9606.ENSP00000245932,9606.ENSP00000262428,9606.ENSP00000295685,9606.ENSP00000326031,9606.ENSP00000340820,9606.ENSP00000351807,9606.ENSP00000353408,9606.ENSP00000378400,9606.ENSP00000389631,9606.ENSP00000395983,9606.ENSP00000429150,9606.ENSP00000482841	CORO1A,VASP,COTL1,ARPC2,PPP1CA,MAPT,ELN,MSN,LIMA1,ARPC1B,SLC12A4,FAM49B,CRABP2
GO:0070663	Regulation of leukocyte proliferation	11	271	0.61	0.42	0.0141	9606.ENSP00000009530,9606.ENSP00000219150,9606.ENSP00000264972,9606.ENSP00000349446,9606.ENSP00000357123,9606.ENSP00000364898,9606.ENSP00000376197,9606.ENSP00000379873,9606.ENSP00000391592,9606.ENSP00000408146,9606.ENSP00000456436	CD74,CORO1A,ZAP70,ARG1,MNDA,SYK,TFRC,HLA-A,PTPN6,HLA-DPB1,CNN2
GO:0051239	Regulation of multicellular organismal process	47	2749	0.24	0.33	0.0158	9606.ENSP00000009530,9606.ENSP00000052754,9606.ENSP00000188790,9606.ENSP00000220003,9606.ENSP00000222271,9606.ENSP00000225964,9606.ENSP00000228945,9606.ENSP00000243346,9606.ENSP00000252244,9606.ENSP00000252999,9606.ENSP00000255040,9606.ENSP00000259951,9606.ENSP00000261483,9606.ENSP00000264972,9606.ENSP00000266718,9606.ENSP00000300026,9606.ENSP00000302935,9606.ENSP00000310036,9606.ENSP00000325527,…	CD74,DCN,FAP,CSK,COMP,COL1A1,ARHGDIB,NMI,KRT1,LAMA5,APCS,HLA-F,MAN2A1,ZAP70,LUM,PPIB,IL16,CD34,FBN1,MAPT,WARS1,ARG1,SPINK5,STAT1,MNDA,ECM1,GBP1,STK4,LCN2,ALOX5,SYK,CYBB,DSP,SSC5D,TFRC,HLA-DRA,TYMP,HLA-A,ITGB2,PTPN6,HLA-DPB1,FAM49B,CFL1,CASP1,UBE2J1,CRABP2,B2M
GO:0018279	Protein N-linked glycosylation via asparagine	4	23	1.24	0.48	0.0159	9606.ENSP00000237530,9606.ENSP00000239891,9606.ENSP00000296255,9606.ENSP00000451261	RPN2,ALG5,RPN1,UBE2J1
GO:0045824	Negative regulation of innate immune response	6	74	0.91	0.45	0.0163	9606.ENSP00000243346,9606.ENSP00000259951,9606.ENSP00000315768,9606.ENSP00000349446,9606.ENSP00000370074,9606.ENSP00000379873	NMI,HLA-F,STAT2,ARG1,SERPINB9,HLA-A
GO:0043313	Regulation of neutrophil degranulation	3	8	1.58	0.49	0.0170	9606.ENSP00000364898,9606.ENSP00000380948,9606.ENSP00000496959	SYK,ITGB2,ITGAM
GO:0030036	Actin cytoskeleton organization	16	547	0.47	0.38	0.0175	9606.ENSP00000219150,9606.ENSP00000245932,9606.ENSP00000258787,9606.ENSP00000295685,9606.ENSP00000299767,9606.ENSP00000329219,9606.ENSP00000351807,9606.ENSP00000376132,9606.ENSP00000378400,9606.ENSP00000381581,9606.ENSP00000389631,9606.ENSP00000407685,9606.ENSP00000429283,9606.ENSP00000432660,9606.ENSP00000456436,9606.ENSP00000494550	CORO1A,VASP,MYO1G,ARPC2,HSP90B1,FMNL1,ELN,MYO1B,LIMA1,LCP1,ARPC1B,TNXB,DOCK2,CFL1,CNN2,MYO1F
GO:0002700	Regulation of production of molecular mediator of immune response	9	189	0.68	0.41	0.0179	9606.ENSP00000009530,9606.ENSP00000259951,9606.ENSP00000349446,9606.ENSP00000352936,9606.ENSP00000364898,9606.ENSP00000376197,9606.ENSP00000379873,9606.ENSP00000451261,9606.ENSP00000497910	CD74,HLA-F,ARG1,SPINK5,SYK,TFRC,HLA-A,UBE2J1,B2M
GO:0002824	Positive regulation of adaptive immune response based on somatic recombination of immune receptors built from immunoglobulin superfamily domains	7	110	0.81	0.43	0.0182	9606.ENSP00000259951,9606.ENSP00000364032,9606.ENSP00000376197,9606.ENSP00000378786,9606.ENSP00000379873,9606.ENSP00000429150,9606.ENSP00000497910	HLA-F,TAP2,TFRC,HLA-DRA,HLA-A,FAM49B,B2M
GO:0002832	Negative regulation of response to biotic stimulus	7	112	0.8	0.42	0.0200	9606.ENSP00000243346,9606.ENSP00000259951,9606.ENSP00000315768,9606.ENSP00000349446,9606.ENSP00000352936,9606.ENSP00000370074,9606.ENSP00000379873	NMI,HLA-F,STAT2,ARG1,SPINK5,SERPINB9,HLA-A
GO:0031334	Positive regulation of protein-containing complex assembly	9	193	0.67	0.4	0.0203	9606.ENSP00000245932,9606.ENSP00000295685,9606.ENSP00000340820,9606.ENSP00000347495,9606.ENSP00000353408,9606.ENSP00000364898,9606.ENSP00000376197,9606.ENSP00000381581,9606.ENSP00000432768	VASP,ARPC2,MAPT,WARS1,MSN,SYK,TFRC,LCP1,CKAP5
GO:0001959	Regulation of cytokine-mediated signaling pathway	8	152	0.72	0.41	0.0211	9606.ENSP00000009530,9606.ENSP00000315768,9606.ENSP00000349446,9606.ENSP00000353512,9606.ENSP00000358045,9606.ENSP00000364898,9606.ENSP00000391592,9606.ENSP00000433138	CD74,STAT2,ARG1,PARP9,ECM1,SYK,PTPN6,CASP1
GO:0052547	Regulation of peptidase activity	14	446	0.5	0.37	0.0216	9606.ENSP00000216802,9606.ENSP00000263598,9606.ENSP00000264474,9606.ENSP00000265132,9606.ENSP00000269489,9606.ENSP00000295550,9606.ENSP00000332371,9606.ENSP00000340820,9606.ENSP00000352936,9606.ENSP00000358045,9606.ENSP00000364898,9606.ENSP00000370074,9606.ENSP00000433138,9606.ENSP00000434412	PSME2,LCN1,CSTA,AMBP,SERPINB13,COL6A3,COL7A1,MAPT,SPINK5,ECM1,SYK,SERPINB9,CASP1,SERPINH1
GO:0032502	Developmental process	80	5657	0.15	0.29	0.0221	9606.ENSP00000009530,9606.ENSP00000052754,9606.ENSP00000188790,9606.ENSP00000216780,9606.ENSP00000220003,9606.ENSP00000222271,9606.ENSP00000225275,9606.ENSP00000225964,9606.ENSP00000236040,9606.ENSP00000237530,9606.ENSP00000239891,9606.ENSP00000245932,9606.ENSP00000246635,9606.ENSP00000252244,9606.ENSP00000252999,9606.ENSP00000261483,9606.ENSP00000264474,9606.ENSP00000264972,9606.ENSP00000269576,…	CD74,DCN,FAP,PCK2,CSK,COMP,MPO,COL1A1,P3H1,RPN2,ALG5,VASP,KRT13,KRT1,LAMA5,MAN2A1,CSTA,ZAP70,KRT10,COL6A3,COL1A2,PPIB,SCEL,COL3A1,KRT78,CD34,FBN1,PPP1CA,BGN,H1-5,KRT76,IKZF1,COL7A1,ACSL4,PPL,MAPT,SEPTIN6,PRELP,WARS1,SH3PXD2A,ARG1,ELN,DNMT1,SPINK5,MSN,STAT1,COL6A1,FLG,HRNR,ECM1,SLC25A5,COL5A1,ADIRF,STK4,COL5A2,SYK,CDSN,RRBP1,DSP,TGM3,FLG2,TFRC,TYMP,ITGB2,LCP1,PTPN6,STMN1,KRT3,DOCK2,SERPINH1,NNMT,S…
GO:0043302	Positive regulation of leukocyte degranulation	4	26	1.19	0.44	0.0221	9606.ENSP00000259951,9606.ENSP00000364898,9606.ENSP00000380948,9606.ENSP00000496959	HLA-F,SYK,ITGB2,ITGAM
GO:0048856	Anatomical structure development	74	5117	0.16	0.29	0.0221	9606.ENSP00000009530,9606.ENSP00000052754,9606.ENSP00000188790,9606.ENSP00000216780,9606.ENSP00000220003,9606.ENSP00000222271,9606.ENSP00000225964,9606.ENSP00000236040,9606.ENSP00000239891,9606.ENSP00000245932,9606.ENSP00000246635,9606.ENSP00000252244,9606.ENSP00000252999,9606.ENSP00000261483,9606.ENSP00000264474,9606.ENSP00000264972,9606.ENSP00000269576,9606.ENSP00000295550,9606.ENSP00000297268,…	CD74,DCN,FAP,PCK2,CSK,COMP,COL1A1,P3H1,ALG5,VASP,KRT13,KRT1,LAMA5,MAN2A1,CSTA,ZAP70,KRT10,COL6A3,COL1A2,PPIB,SCEL,COL3A1,KRT78,CD34,FBN1,PPP1CA,BGN,H1-5,KRT76,IKZF1,COL7A1,ACSL4,PPL,MAPT,PRELP,WARS1,SH3PXD2A,ARG1,ELN,DNMT1,SPINK5,MSN,STAT1,COL6A1,FLG,HRNR,ECM1,SLC25A5,COL5A1,STK4,COL5A2,SYK,CDSN,DSP,TGM3,FLG2,TFRC,TYMP,ITGB2,LCP1,PTPN6,STMN1,KRT3,DOCK2,SERPINH1,NNMT,SCO2,UBE2J1,CNN2,RNF213,MTHFD1…
GO:0050670	Regulation of lymphocyte proliferation	10	242	0.62	0.39	0.0221	9606.ENSP00000009530,9606.ENSP00000219150,9606.ENSP00000264972,9606.ENSP00000349446,9606.ENSP00000357123,9606.ENSP00000364898,9606.ENSP00000376197,9606.ENSP00000379873,9606.ENSP00000391592,9606.ENSP00000408146	CD74,CORO1A,ZAP70,ARG1,MNDA,SYK,TFRC,HLA-A,PTPN6,HLA-DPB1
GO:0090066	Regulation of anatomical structure size	15	505	0.47	0.36	0.0221	9606.ENSP00000219150,9606.ENSP00000222271,9606.ENSP00000245932,9606.ENSP00000262428,9606.ENSP00000295685,9606.ENSP00000326031,9606.ENSP00000340820,9606.ENSP00000351807,9606.ENSP00000353408,9606.ENSP00000371554,9606.ENSP00000378400,9606.ENSP00000389631,9606.ENSP00000395983,9606.ENSP00000429150,9606.ENSP00000482841	CORO1A,COMP,VASP,COTL1,ARPC2,PPP1CA,MAPT,ELN,MSN,SOD3,LIMA1,ARPC1B,SLC12A4,FAM49B,CRABP2
GO:0002708	Positive regulation of lymphocyte mediated immunity	7	116	0.78	0.41	0.0229	9606.ENSP00000259951,9606.ENSP00000364032,9606.ENSP00000376197,9606.ENSP00000378786,9606.ENSP00000379873,9606.ENSP00000429150,9606.ENSP00000497910	HLA-F,TAP2,TFRC,HLA-DRA,HLA-A,FAM49B,B2M
GO:0010941	Regulation of cell death	32	1651	0.29	0.32	0.0241	9606.ENSP00000009530,9606.ENSP00000188790,9606.ENSP00000219150,9606.ENSP00000222271,9606.ENSP00000225275,9606.ENSP00000244333,9606.ENSP00000259951,9606.ENSP00000269489,9606.ENSP00000299767,9606.ENSP00000310036,9606.ENSP00000326031,9606.ENSP00000340820,9606.ENSP00000352516,9606.ENSP00000354394,9606.ENSP00000357123,9606.ENSP00000360671,9606.ENSP00000360876,9606.ENSP00000361892,9606.ENSP00000364898,…	CD74,FAP,CORO1A,COMP,MPO,LYPD3,HLA-F,SERPINB13,HSP90B1,CD34,PPP1CA,MAPT,DNMT1,STAT1,MNDA,SLC25A5,IFIT3,STK4,SYK,CDSN,TXNDC5,SERPINB9,TFRC,ASNS,ITGB2,PTPN6,CFL1,CASP1,RNPS1,RSL1D1,HYOU1,ITGAM
GO:0051291	Protein heterooligomerization	4	27	1.17	0.43	0.0241	9606.ENSP00000252244,9606.ENSP00000269576,9606.ENSP00000297268,9606.ENSP00000363794	KRT1,KRT10,COL1A2,HSD17B8
GO:0046649	Lymphocyte activation	14	457	0.49	0.36	0.0253	9606.ENSP00000009530,9606.ENSP00000219150,9606.ENSP00000264972,9606.ENSP00000331614,9606.ENSP00000349252,9606.ENSP00000353408,9606.ENSP00000360671,9606.ENSP00000364898,9606.ENSP00000379873,9606.ENSP00000380948,9606.ENSP00000381581,9606.ENSP00000391592,9606.ENSP00000429283,9606.ENSP00000497910	CD74,CORO1A,ZAP70,IKZF1,ITGAL,MSN,SLC25A5,SYK,HLA-A,ITGB2,LCP1,PTPN6,DOCK2,B2M
GO:0010466	Negative regulation of peptidase activity	10	249	0.61	0.37	0.0259	9606.ENSP00000263598,9606.ENSP00000264474,9606.ENSP00000265132,9606.ENSP00000269489,9606.ENSP00000295550,9606.ENSP00000332371,9606.ENSP00000352936,9606.ENSP00000358045,9606.ENSP00000370074,9606.ENSP00000434412	LCN1,CSTA,AMBP,SERPINB13,COL6A3,COL7A1,SPINK5,ECM1,SERPINB9,SERPINH1
GO:0042110	T cell activation	11	298	0.57	0.37	0.0259	9606.ENSP00000009530,9606.ENSP00000219150,9606.ENSP00000264972,9606.ENSP00000349252,9606.ENSP00000353408,9606.ENSP00000364898,9606.ENSP00000379873,9606.ENSP00000381581,9606.ENSP00000391592,9606.ENSP00000429283,9606.ENSP00000497910	CD74,CORO1A,ZAP70,ITGAL,MSN,SYK,HLA-A,LCP1,PTPN6,DOCK2,B2M
GO:0002718	Regulation of cytokine production involved in immune response	7	120	0.77	0.39	0.0265	9606.ENSP00000009530,9606.ENSP00000259951,9606.ENSP00000349446,9606.ENSP00000364898,9606.ENSP00000379873,9606.ENSP00000451261,9606.ENSP00000497910	CD74,HLA-F,ARG1,SYK,HLA-A,UBE2J1,B2M
GO:0008064	Regulation of actin polymerization or depolymerization	8	161	0.7	0.38	0.0274	9606.ENSP00000219150,9606.ENSP00000245932,9606.ENSP00000262428,9606.ENSP00000295685,9606.ENSP00000351807,9606.ENSP00000378400,9606.ENSP00000389631,9606.ENSP00000429150	CORO1A,VASP,COTL1,ARPC2,ELN,LIMA1,ARPC1B,FAM49B
GO:0043589	Skin morphogenesis	3	11	1.44	0.41	0.0306	9606.ENSP00000225964,9606.ENSP00000297268,9606.ENSP00000365465	COL1A1,COL1A2,CDSN
GO:0045059	Positive thymic T cell selection	3	11	1.44	0.41	0.0306	9606.ENSP00000009530,9606.ENSP00000264972,9606.ENSP00000429283	CD74,ZAP70,DOCK2
GO:0045060	Negative thymic T cell selection	3	11	1.44	0.41	0.0306	9606.ENSP00000009530,9606.ENSP00000264972,9606.ENSP00000429283	CD74,ZAP70,DOCK2
GO:0016477	Cell migration	21	903	0.37	0.32	0.0307	9606.ENSP00000188790,9606.ENSP00000219150,9606.ENSP00000252999,9606.ENSP00000258787,9606.ENSP00000264972,9606.ENSP00000300026,9606.ENSP00000302935,9606.ENSP00000304408,9606.ENSP00000310036,9606.ENSP00000329219,9606.ENSP00000349252,9606.ENSP00000353408,9606.ENSP00000353512,9606.ENSP00000360882,9606.ENSP00000363512,9606.ENSP00000364898,9606.ENSP00000378400,9606.ENSP00000380948,9606.ENSP00000381581,…	FAP,CORO1A,LAMA5,MYO1G,ZAP70,PPIB,IL16,COL3A1,CD34,FMNL1,ITGAL,MSN,PARP9,COL5A1,ALOX5,SYK,LIMA1,ITGB2,LCP1,DOCK2,CNN2
GO:0052548	Regulation of endopeptidase activity	13	414	0.5	0.34	0.0313	9606.ENSP00000216802,9606.ENSP00000263598,9606.ENSP00000264474,9606.ENSP00000265132,9606.ENSP00000269489,9606.ENSP00000295550,9606.ENSP00000332371,9606.ENSP00000340820,9606.ENSP00000352936,9606.ENSP00000364898,9606.ENSP00000370074,9606.ENSP00000433138,9606.ENSP00000434412	PSME2,LCN1,CSTA,AMBP,SERPINB13,COL6A3,COL7A1,MAPT,SPINK5,SYK,SERPINB9,CASP1,SERPINH1
GO:0001909	Leukocyte mediated cytotoxicity	5	56	0.95	0.39	0.0315	9606.ENSP00000219150,9606.ENSP00000364032,9606.ENSP00000379873,9606.ENSP00000391592,9606.ENSP00000497910	CORO1A,TAP2,HLA-A,PTPN6,B2M
GO:0002443	Leukocyte mediated immunity	9	211	0.63	0.36	0.0315	9606.ENSP00000009530,9606.ENSP00000219150,9606.ENSP00000258787,9606.ENSP00000364032,9606.ENSP00000364898,9606.ENSP00000370074,9606.ENSP00000379873,9606.ENSP00000391592,9606.ENSP00000497910	CD74,CORO1A,MYO1G,TAP2,SYK,SERPINB9,HLA-A,PTPN6,B2M
GO:0002707	Negative regulation of lymphocyte mediated immunity	5	56	0.95	0.39	0.0315	9606.ENSP00000259951,9606.ENSP00000349446,9606.ENSP00000370074,9606.ENSP00000379873,9606.ENSP00000391592	HLA-F,ARG1,SERPINB9,HLA-A,PTPN6
GO:0007159	Leukocyte cell-cell adhesion	5	56	0.95	0.39	0.0315	9606.ENSP00000264972,9606.ENSP00000349252,9606.ENSP00000353408,9606.ENSP00000364898,9606.ENSP00000380948	ZAP70,ITGAL,MSN,SYK,ITGB2
GO:0048585	Negative regulation of response to stimulus	31	1612	0.29	0.3	0.0315	9606.ENSP00000009530,9606.ENSP00000052754,9606.ENSP00000220003,9606.ENSP00000243346,9606.ENSP00000252244,9606.ENSP00000255040,9606.ENSP00000259951,9606.ENSP00000261883,9606.ENSP00000265132,9606.ENSP00000304408,9606.ENSP00000310036,9606.ENSP00000315768,9606.ENSP00000325527,9606.ENSP00000349446,9606.ENSP00000352936,9606.ENSP00000354394,9606.ENSP00000358045,9606.ENSP00000359504,9606.ENSP00000360671,…	CD74,DCN,CSK,NMI,KRT1,APCS,HLA-F,CILP,AMBP,COL3A1,CD34,STAT2,FBN1,ARG1,SPINK5,STAT1,ECM1,GBP1,SLC25A5,STK4,ALOX5,SYK,SERPINB9,HLA-A,PTPN6,IFI35,FBP1,STMN1,FAM49B,RNF213,HYOU1
GO:0090140	Regulation of mitochondrial fission	4	30	1.13	0.4	0.0315	9606.ENSP00000052754,9606.ENSP00000315768,9606.ENSP00000340820,9606.ENSP00000429150	DCN,STAT2,MAPT,FAM49B
GO:0034341	Response to interferon-gamma	7	127	0.74	0.37	0.0336	9606.ENSP00000009530,9606.ENSP00000243346,9606.ENSP00000354394,9606.ENSP00000359497,9606.ENSP00000359504,9606.ENSP00000433138,9606.ENSP00000484689	CD74,NMI,STAT1,GBP2,GBP1,CASP1,IFITM2
GO:0000302	Response to reactive oxygen species	8	169	0.68	0.36	0.0338	9606.ENSP00000225275,9606.ENSP00000225964,9606.ENSP00000265132,9606.ENSP00000340820,9606.ENSP00000349446,9606.ENSP00000354394,9606.ENSP00000354501,9606.ENSP00000371554	MPO,COL1A1,AMBP,MAPT,ARG1,STAT1,ZNF277,SOD3
GO:0002764	Immune response-regulating signaling pathway	11	312	0.55	0.34	0.0338	9606.ENSP00000220003,9606.ENSP00000243346,9606.ENSP00000258787,9606.ENSP00000264972,9606.ENSP00000357123,9606.ENSP00000357981,9606.ENSP00000364898,9606.ENSP00000379873,9606.ENSP00000391592,9606.ENSP00000408146,9606.ENSP00000433138	CSK,NMI,MYO1G,ZAP70,MNDA,CTSS,SYK,HLA-A,PTPN6,HLA-DPB1,CASP1
GO:0051262	Protein tetramerization	6	91	0.82	0.37	0.0351	9606.ENSP00000245932,9606.ENSP00000252244,9606.ENSP00000269576,9606.ENSP00000361892,9606.ENSP00000363794,9606.ENSP00000497910	VASP,KRT1,KRT10,STK4,HSD17B8,B2M
GO:0060348	Bone development	9	216	0.62	0.35	0.0355	9606.ENSP00000222271,9606.ENSP00000225964,9606.ENSP00000236040,9606.ENSP00000300026,9606.ENSP00000304408,9606.ENSP00000327336,9606.ENSP00000358045,9606.ENSP00000391592,9606.ENSP00000434412	COMP,COL1A1,P3H1,PPIB,COL3A1,BGN,ECM1,PTPN6,SERPINH1
GO:0022603	Regulation of anatomical structure morphogenesis	21	920	0.36	0.31	0.0358	9606.ENSP00000052754,9606.ENSP00000219150,9606.ENSP00000252244,9606.ENSP00000295685,9606.ENSP00000310036,9606.ENSP00000315768,9606.ENSP00000329219,9606.ENSP00000340820,9606.ENSP00000347495,9606.ENSP00000352936,9606.ENSP00000353408,9606.ENSP00000354394,9606.ENSP00000358045,9606.ENSP00000359504,9606.ENSP00000363512,9606.ENSP00000367851,9606.ENSP00000376197,9606.ENSP00000380948,9606.ENSP00000429150,…	DCN,CORO1A,KRT1,ARPC2,CD34,STAT2,FMNL1,MAPT,WARS1,SPINK5,MSN,STAT1,ECM1,GBP1,ALOX5,CYBB,TFRC,ITGB2,FAM49B,CFL1,CRABP2
GO:0001819	Positive regulation of cytokine production	14	482	0.47	0.32	0.0363	9606.ENSP00000009530,9606.ENSP00000259951,9606.ENSP00000266718,9606.ENSP00000302935,9606.ENSP00000310036,9606.ENSP00000354394,9606.ENSP00000357123,9606.ENSP00000364898,9606.ENSP00000367851,9606.ENSP00000379873,9606.ENSP00000408146,9606.ENSP00000429150,9606.ENSP00000433138,9606.ENSP00000497910	CD74,HLA-F,LUM,IL16,CD34,STAT1,MNDA,SYK,CYBB,HLA-A,HLA-DPB1,FAM49B,CASP1,B2M
GO:0051017	Actin filament bundle assembly	5	59	0.93	0.37	0.0363	9606.ENSP00000299767,9606.ENSP00000351807,9606.ENSP00000376132,9606.ENSP00000378400,9606.ENSP00000381581	HSP90B1,ELN,MYO1B,LIMA1,LCP1
GO:1901701	Cellular response to oxygen-containing compound	23	1057	0.34	0.3	0.0363	9606.ENSP00000216780,9606.ENSP00000220003,9606.ENSP00000225275,9606.ENSP00000225964,9606.ENSP00000265132,9606.ENSP00000297268,9606.ENSP00000299767,9606.ENSP00000301149,9606.ENSP00000304408,9606.ENSP00000325527,9606.ENSP00000340820,9606.ENSP00000349446,9606.ENSP00000352516,9606.ENSP00000353408,9606.ENSP00000354394,9606.ENSP00000354501,9606.ENSP00000355180,9606.ENSP00000364000,9606.ENSP00000367851,…	PCK2,CSK,MPO,COL1A1,AMBP,COL1A2,HSP90B1,GPD1,COL3A1,FBN1,MAPT,ARG1,DNMT1,MSN,STAT1,ZNF277,COL6A1,COL5A2,CYBB,SOD3,FBP1,CASP1,B2M
GO:0048871	Multicellular organismal homeostasis	12	372	0.51	0.33	0.0379	9606.ENSP00000219150,9606.ENSP00000222271,9606.ENSP00000252244,9606.ENSP00000263598,9606.ENSP00000292401,9606.ENSP00000304408,9606.ENSP00000310036,9606.ENSP00000357789,9606.ENSP00000357791,9606.ENSP00000373370,9606.ENSP00000410452,9606.ENSP00000497910	CORO1A,COMP,KRT1,LCN1,AZGP1,COL3A1,CD34,FLG,HRNR,FLG2,STMN1,B2M
GO:0050793	Regulation of developmental process	42	2492	0.23	0.28	0.0379	9606.ENSP00000009530,9606.ENSP00000052754,9606.ENSP00000219150,9606.ENSP00000222271,9606.ENSP00000225964,9606.ENSP00000252244,9606.ENSP00000252999,9606.ENSP00000255040,9606.ENSP00000261483,9606.ENSP00000264972,9606.ENSP00000269576,9606.ENSP00000295685,9606.ENSP00000300026,9606.ENSP00000310036,9606.ENSP00000315768,9606.ENSP00000325527,9606.ENSP00000329219,9606.ENSP00000340820,9606.ENSP00000347495,…	CD74,DCN,CORO1A,COMP,COL1A1,KRT1,LAMA5,APCS,MAN2A1,ZAP70,KRT10,ARPC2,PPIB,CD34,STAT2,FBN1,FMNL1,MAPT,WARS1,DNMT1,SPINK5,MSN,STAT1,ECM1,GBP1,COL5A1,ADIRF,STK4,ALOX5,COL5A2,SYK,CYBB,TFRC,HLA-DRA,TYMP,ITGB2,PTPN6,TNXB,FAM49B,CFL1,CRABP2,B2M
GO:0043903	Regulation of biological process involved in symbiotic interaction	5	60	0.92	0.37	0.0380	9606.ENSP00000009530,9606.ENSP00000255040,9606.ENSP00000349446,9606.ENSP00000369299,9606.ENSP00000484689	CD74,APCS,ARG1,TRIM22,IFITM2
GO:0002456	T cell mediated immunity	4	33	1.09	0.37	0.0392	9606.ENSP00000258787,9606.ENSP00000364032,9606.ENSP00000379873,9606.ENSP00000497910	MYO1G,TAP2,HLA-A,B2M
GO:0048525	Negative regulation of viral process	6	94	0.81	0.36	0.0392	9606.ENSP00000009530,9606.ENSP00000255040,9606.ENSP00000327459,9606.ENSP00000354394,9606.ENSP00000381601,9606.ENSP00000484689	CD74,APCS,APOBEC3B,STAT1,MX1,IFITM2
GO:0051716	Cellular response to stimulus	86	6357	0.13	0.26	0.0393	9606.ENSP00000009530,9606.ENSP00000216780,9606.ENSP00000219150,9606.ENSP00000220003,9606.ENSP00000222271,9606.ENSP00000225275,9606.ENSP00000225964,9606.ENSP00000225972,9606.ENSP00000228945,9606.ENSP00000242786,9606.ENSP00000243346,9606.ENSP00000246635,9606.ENSP00000252999,9606.ENSP00000258787,9606.ENSP00000261883,9606.ENSP00000263946,9606.ENSP00000264972,9606.ENSP00000265132,9606.ENSP00000271835,…	CD74,PCK2,CORO1A,CSK,COMP,MPO,COL1A1,LRRC59,ARHGDIB,ADGRE5,NMI,KRT13,LAMA5,MYO1G,CILP,PKP1,ZAP70,AMBP,CRNN,HSPB8,DTX3L,COL1A2,HSP90B1,PPIB,PLIN1,GPD1,IL16,COL3A1,TBL2,CD34,STAT2,OLFML3,FBN1,PPP1CA,OLFML1,ARHGEF1,MAPT,PRELP,ITGAL,ARG1,DNMT1,MSN,PARP9,STAT1,ZNF277,COL6A1,MNDA,CTSS,ECM1,GBP2,GBP1,IFIT3,STK4,ALOX5,COL5A2,SYK,CYBB,SERPINB9,LSP1,SOD3,GPX3,TFRC,ASNS,TYMP,HLA-A,ITGB2,LCP1,MX1,PTPN6,FBP1,…
GO:0048583	Regulation of response to stimulus	59	3931	0.18	0.26	0.0415	9606.ENSP00000009530,9606.ENSP00000052754,9606.ENSP00000188790,9606.ENSP00000220003,9606.ENSP00000225964,9606.ENSP00000225972,9606.ENSP00000228945,9606.ENSP00000243346,9606.ENSP00000252244,9606.ENSP00000255040,9606.ENSP00000258787,9606.ENSP00000259951,9606.ENSP00000261883,9606.ENSP00000264972,9606.ENSP00000265132,9606.ENSP00000271835,9606.ENSP00000296161,9606.ENSP00000302579,9606.ENSP00000302935,…	CD74,DCN,FAP,CSK,COL1A1,LRRC59,ARHGDIB,NMI,KRT1,APCS,MYO1G,HLA-F,CILP,ZAP70,AMBP,CRNN,DTX3L,SCEL,IL16,COL3A1,CD34,STAT2,FBN1,PPP1CA,ARHGEF1,MAPT,ARG1,SPINK5,PARP9,STAT1,MNDA,CTSS,ECM1,GBP1,SLC25A5,STK4,ALOX5,TAP2,SYK,TRIM22,SERPINB9,TFRC,HLA-DRA,HLA-A,ITGB2,PTPN6,IFI35,TAPBP,FBP1,HLA-DPB1,STMN1,FAM49B,DOCK2,CASP1,ARHGAP45,RNF213,HYOU1,ITGAM,B2M
GO:0007160	Cell-matrix adhesion	7	136	0.71	0.34	0.0445	9606.ENSP00000244333,9606.ENSP00000304408,9606.ENSP00000310036,9606.ENSP00000349252,9606.ENSP00000380948,9606.ENSP00000407685,9606.ENSP00000496959	LYPD3,COL3A1,CD34,ITGAL,ITGB2,TNXB,ITGAM
GO:1902903	Regulation of supramolecular fiber organization	12	382	0.5	0.31	0.0452	9606.ENSP00000219150,9606.ENSP00000245932,9606.ENSP00000262428,9606.ENSP00000295685,9606.ENSP00000340820,9606.ENSP00000351807,9606.ENSP00000378400,9606.ENSP00000389631,9606.ENSP00000407685,9606.ENSP00000410452,9606.ENSP00000429150,9606.ENSP00000432768	CORO1A,VASP,COTL1,ARPC2,MAPT,ELN,LIMA1,ARPC1B,TNXB,STMN1,FAM49B,CKAP5
GO:0001913	T cell mediated cytotoxicity	3	14	1.33	0.37	0.0460	9606.ENSP00000364032,9606.ENSP00000379873,9606.ENSP00000497910	TAP2,HLA-A,B2M
GO:0002481	Antigen processing and presentation of exogenous protein antigen via MHC class Ib, TAP-dependent	2	2	2.0	0.37	0.0460	9606.ENSP00000364032,9606.ENSP00000497910	TAP2,B2M
GO:0002485	Antigen processing and presentation of endogenous peptide antigen via MHC class I via ER pathway, TAP-dependent	2	2	2.0	0.37	0.0460	9606.ENSP00000364032,9606.ENSP00000379873	TAP2,HLA-A
GO:0045963	Negative regulation of dopamine metabolic process	2	2	2.0	0.37	0.0460	9606.ENSP00000380948,9606.ENSP00000496959	ITGB2,ITGAM
GO:0070489	T cell aggregation	2	2	2.0	0.37	0.0460	9606.ENSP00000264972,9606.ENSP00000353408	ZAP70,MSN
GO:2000568	Positive regulation of memory T cell activation	2	2	2.0	0.37	0.0460	9606.ENSP00000379873,9606.ENSP00000429150	HLA-A,FAM49B
GO:0042127	Regulation of cell population proliferation	31	1669	0.27	0.27	0.0468	9606.ENSP00000009530,9606.ENSP00000188790,9606.ENSP00000219150,9606.ENSP00000220003,9606.ENSP00000222271,9606.ENSP00000236040,9606.ENSP00000243346,9606.ENSP00000252999,9606.ENSP00000264972,9606.ENSP00000271835,9606.ENSP00000292401,9606.ENSP00000315768,9606.ENSP00000347495,9606.ENSP00000349446,9606.ENSP00000351807,9606.ENSP00000352516,9606.ENSP00000354394,9606.ENSP00000357123,9606.ENSP00000358045,…	CD74,FAP,CORO1A,CSK,COMP,P3H1,NMI,LAMA5,ZAP70,CRNN,AZGP1,STAT2,WARS1,ARG1,ELN,DNMT1,STAT1,MNDA,ECM1,SLC25A5,IFIT3,STK4,ALOX5,SYK,TFRC,HLA-A,PTPN6,IFI35,HLA-DPB1,CNN2,B2M
GO:0032102	Negative regulation of response to external stimulus	12	387	0.49	0.31	0.0477	9606.ENSP00000243346,9606.ENSP00000252244,9606.ENSP00000255040,9606.ENSP00000259951,9606.ENSP00000310036,9606.ENSP00000315768,9606.ENSP00000349446,9606.ENSP00000352936,9606.ENSP00000363512,9606.ENSP00000364898,9606.ENSP00000370074,9606.ENSP00000379873	NMI,KRT1,APCS,HLA-F,CD34,STAT2,ARG1,SPINK5,ALOX5,SYK,SERPINB9,HLA-A
GO:0007229	Integrin-mediated signaling pathway	6	100	0.78	0.33	0.0486	9606.ENSP00000252999,9606.ENSP00000304408,9606.ENSP00000349252,9606.ENSP00000364898,9606.ENSP00000380948,9606.ENSP00000496959	LAMA5,COL3A1,ITGAL,SYK,ITGB2,ITGAM

## Sheet: Top40 Leuko non-ca and OSCC 
#term ID	term description	observed gene count	background gene count	strength	signal	false discovery rate	matching proteins in your network (IDs)	matching proteins in your network (labels)
GO:0043588	Skin development	10	266	1.28	1.51	1.69e-06	9606.ENSP00000225964,9606.ENSP00000297268,9606.ENSP00000304408,9606.ENSP00000330101,9606.ENSP00000357789,9606.ENSP00000360882,9606.ENSP00000364000,9606.ENSP00000370867,9606.ENSP00000373370,9606.ENSP00000413479	COL1A1,COL1A2,COL3A1,KRT76,FLG,COL5A1,COL5A2,TGM3,FLG2,KRT3
GO:0030199	Collagen fibril organization	6	59	1.71	1.56	2.37e-05	9606.ENSP00000225964,9606.ENSP00000297268,9606.ENSP00000304408,9606.ENSP00000360882,9606.ENSP00000364000,9606.ENSP00000434412	COL1A1,COL1A2,COL3A1,COL5A1,COL5A2,SERPINH1
GO:0006950	Response to stress	23	3358	0.54	0.58	2.56e-05	9606.ENSP00000219150,9606.ENSP00000225275,9606.ENSP00000225964,9606.ENSP00000246635,9606.ENSP00000249066,9606.ENSP00000262428,9606.ENSP00000264972,9606.ENSP00000271835,9606.ENSP00000300055,9606.ENSP00000304408,9606.ENSP00000327459,9606.ENSP00000343924,9606.ENSP00000354394,9606.ENSP00000357123,9606.ENSP00000359504,9606.ENSP00000360882,9606.ENSP00000371554,9606.ENSP00000374274,9606.ENSP00000380948,…	CORO1A,MPO,COL1A1,KRT13,APOL2,COTL1,ZAP70,CRNN,PLIN1,COL3A1,APOBEC3B,PRELP,STAT1,MNDA,GBP1,COL5A1,SOD3,SSC5D,ITGB2,MX1,IFI35,SERPINH1,CNN2
GO:0045229	External encapsulating structure organization	8	281	1.16	0.98	0.00031	9606.ENSP00000225964,9606.ENSP00000297268,9606.ENSP00000304408,9606.ENSP00000351310,9606.ENSP00000360882,9606.ENSP00000364000,9606.ENSP00000370867,9606.ENSP00000434412	COL1A1,COL1A2,COL3A1,COL6A6,COL5A1,COL5A2,TGM3,SERPINH1
GO:0097435	Supramolecular fiber organization	10	570	0.95	0.82	0.00041	9606.ENSP00000219150,9606.ENSP00000225964,9606.ENSP00000246635,9606.ENSP00000297268,9606.ENSP00000304408,9606.ENSP00000330101,9606.ENSP00000360882,9606.ENSP00000364000,9606.ENSP00000413479,9606.ENSP00000434412	CORO1A,COL1A1,KRT13,COL1A2,COL3A1,KRT76,COL5A1,COL5A2,KRT3,SERPINH1
GO:0006952	Defense response	13	1394	0.67	0.53	0.0033	9606.ENSP00000219150,9606.ENSP00000225275,9606.ENSP00000249066,9606.ENSP00000262428,9606.ENSP00000264972,9606.ENSP00000327459,9606.ENSP00000354394,9606.ENSP00000357123,9606.ENSP00000359504,9606.ENSP00000374274,9606.ENSP00000380948,9606.ENSP00000381601,9606.ENSP00000395590	CORO1A,MPO,APOL2,COTL1,ZAP70,APOBEC3B,STAT1,MNDA,GBP1,SSC5D,ITGB2,MX1,IFI35
GO:0030198	Extracellular matrix organization	7	278	1.1	0.73	0.0033	9606.ENSP00000225964,9606.ENSP00000297268,9606.ENSP00000304408,9606.ENSP00000351310,9606.ENSP00000360882,9606.ENSP00000364000,9606.ENSP00000434412	COL1A1,COL1A2,COL3A1,COL6A6,COL5A1,COL5A2,SERPINH1
GO:0032964	Collagen biosynthetic process	3	10	2.18	0.92	0.0035	9606.ENSP00000225964,9606.ENSP00000360882,9606.ENSP00000434412	COL1A1,COL5A1,SERPINH1
GO:0009888	Tissue development	14	1723	0.61	0.48	0.0045	9606.ENSP00000225964,9606.ENSP00000246635,9606.ENSP00000297268,9606.ENSP00000304408,9606.ENSP00000330101,9606.ENSP00000331614,9606.ENSP00000354394,9606.ENSP00000357789,9606.ENSP00000360882,9606.ENSP00000370867,9606.ENSP00000373370,9606.ENSP00000380948,9606.ENSP00000413479,9606.ENSP00000434412	COL1A1,KRT13,COL1A2,COL3A1,KRT76,IKZF1,STAT1,FLG,COL5A1,TGM3,FLG2,ITGB2,KRT3,SERPINH1
GO:0032963	Collagen metabolic process	4	61	1.52	0.68	0.0115	9606.ENSP00000225964,9606.ENSP00000297268,9606.ENSP00000360882,9606.ENSP00000434412	COL1A1,COL1A2,COL5A1,SERPINH1
GO:0071230	Cellular response to amino acid stimulus	4	76	1.42	0.57	0.0229	9606.ENSP00000225964,9606.ENSP00000297268,9606.ENSP00000304408,9606.ENSP00000364000	COL1A1,COL1A2,COL3A1,COL5A2
GO:0098542	Defense response to other organism	10	989	0.71	0.42	0.0229	9606.ENSP00000219150,9606.ENSP00000225275,9606.ENSP00000262428,9606.ENSP00000264972,9606.ENSP00000327459,9606.ENSP00000354394,9606.ENSP00000359504,9606.ENSP00000374274,9606.ENSP00000381601,9606.ENSP00000395590	CORO1A,MPO,COTL1,ZAP70,APOBEC3B,STAT1,GBP1,SSC5D,MX1,IFI35
GO:0002376	Immune system process	14	2121	0.52	0.34	0.0329	9606.ENSP00000219150,9606.ENSP00000225275,9606.ENSP00000264972,9606.ENSP00000327459,9606.ENSP00000331614,9606.ENSP00000354394,9606.ENSP00000357123,9606.ENSP00000359504,9606.ENSP00000374274,9606.ENSP00000380948,9606.ENSP00000381601,9606.ENSP00000395590,9606.ENSP00000404833,9606.ENSP00000456436	CORO1A,MPO,ZAP70,APOBEC3B,IKZF1,STAT1,MNDA,GBP1,SSC5D,ITGB2,MX1,IFI35,TAPBP,CNN2
GO:1903225	Negative regulation of endodermal cell differentiation	2	3	2.53	0.54	0.0371	9606.ENSP00000360882,9606.ENSP00000364000	COL5A1,COL5A2
GO:0050896	Response to stimulus	28	7835	0.26	0.24	0.0482	9606.ENSP00000219150,9606.ENSP00000225275,9606.ENSP00000225964,9606.ENSP00000246635,9606.ENSP00000249066,9606.ENSP00000261883,9606.ENSP00000262428,9606.ENSP00000264972,9606.ENSP00000271835,9606.ENSP00000297268,9606.ENSP00000300055,9606.ENSP00000304408,9606.ENSP00000327459,9606.ENSP00000332511,9606.ENSP00000343924,9606.ENSP00000354394,9606.ENSP00000357123,9606.ENSP00000359504,9606.ENSP00000360882,…	CORO1A,MPO,COL1A1,KRT13,APOL2,CILP,COTL1,ZAP70,CRNN,COL1A2,PLIN1,COL3A1,APOBEC3B,OLFML1,PRELP,STAT1,MNDA,GBP1,COL5A1,COL5A2,SOD3,SSC5D,ITGB2,MX1,IFI35,TAPBP,SERPINH1,CNN2

## Sheet: 40 top Leuko-ca and OSCC
#term ID	term description	observed gene count	background gene count	strength	signal	false discovery rate	matching proteins in your network (IDs)	matching proteins in your network (labels)
GO:0043588	Skin development	8	266	1.18	0.9	0.00083	9606.ENSP00000225964,9606.ENSP00000252244,9606.ENSP00000315383,9606.ENSP00000330101,9606.ENSP00000357789,9606.ENSP00000357791,9606.ENSP00000373370,9606.ENSP00000393417	COL1A1,KRT1,ASPRV1,KRT76,FLG,HRNR,FLG2,CASP14
GO:0008544	Epidermis development	8	320	1.1	0.8	0.0016	9606.ENSP00000252244,9606.ENSP00000264144,9606.ENSP00000330101,9606.ENSP00000357789,9606.ENSP00000357791,9606.ENSP00000369689,9606.ENSP00000373370,9606.ENSP00000393417	KRT1,LAMC2,KRT76,FLG,HRNR,CALML5,FLG2,CASP14
GO:0098542	Defense response to other organism	12	989	0.79	0.63	0.0016	9606.ENSP00000219150,9606.ENSP00000252244,9606.ENSP00000262428,9606.ENSP00000327459,9606.ENSP00000333657,9606.ENSP00000349446,9606.ENSP00000354394,9606.ENSP00000359504,9606.ENSP00000364898,9606.ENSP00000381601,9606.ENSP00000395590,9606.ENSP00000442626	CORO1A,KRT1,COTL1,APOBEC3B,MX2,ARG1,STAT1,GBP1,SYK,MX1,IFI35,PRB3
GO:0061436	Establishment of skin barrier	4	28	1.86	0.99	0.0018	9606.ENSP00000252244,9606.ENSP00000357789,9606.ENSP00000357791,9606.ENSP00000373370	KRT1,FLG,HRNR,FLG2
GO:0045087	Innate immune response	10	754	0.83	0.59	0.0043	9606.ENSP00000219150,9606.ENSP00000252244,9606.ENSP00000327459,9606.ENSP00000333657,9606.ENSP00000349446,9606.ENSP00000354394,9606.ENSP00000359504,9606.ENSP00000364898,9606.ENSP00000381601,9606.ENSP00000395590	CORO1A,KRT1,APOBEC3B,MX2,ARG1,STAT1,GBP1,SYK,MX1,IFI35
GO:0002483	Antigen processing and presentation of endogenous peptide antigen	3	18	1.93	0.67	0.0153	9606.ENSP00000259951,9606.ENSP00000292401,9606.ENSP00000404833	HLA-F,AZGP1,TAPBP
GO:0030216	Keratinocyte differentiation	5	138	1.26	0.6	0.0153	9606.ENSP00000252244,9606.ENSP00000330101,9606.ENSP00000357789,9606.ENSP00000357791,9606.ENSP00000393417	KRT1,KRT76,FLG,HRNR,CASP14
GO:0031424	Keratinization	4	83	1.39	0.56	0.0237	9606.ENSP00000252244,9606.ENSP00000330101,9606.ENSP00000357791,9606.ENSP00000393417	KRT1,KRT76,HRNR,CASP14
GO:0002376	Immune system process	14	2121	0.52	0.35	0.0274	9606.ENSP00000219150,9606.ENSP00000252244,9606.ENSP00000259951,9606.ENSP00000292401,9606.ENSP00000327459,9606.ENSP00000331614,9606.ENSP00000333657,9606.ENSP00000349446,9606.ENSP00000354394,9606.ENSP00000359504,9606.ENSP00000364898,9606.ENSP00000381601,9606.ENSP00000395590,9606.ENSP00000404833	CORO1A,KRT1,HLA-F,AZGP1,APOBEC3B,IKZF1,MX2,ARG1,STAT1,GBP1,SYK,MX1,IFI35,TAPBP
GO:0006955	Immune response	11	1321	0.62	0.38	0.0302	9606.ENSP00000219150,9606.ENSP00000252244,9606.ENSP00000327459,9606.ENSP00000333657,9606.ENSP00000349446,9606.ENSP00000354394,9606.ENSP00000359504,9606.ENSP00000364898,9606.ENSP00000381601,9606.ENSP00000395590,9606.ENSP00000404833	CORO1A,KRT1,APOBEC3B,MX2,ARG1,STAT1,GBP1,SYK,MX1,IFI35,TAPBP

## Sheet: Leuko-ca and OSCC
#term ID	term description	observed gene count	background gene count	strength	signal	false discovery rate	matching proteins in your network (IDs)	matching proteins in your network (labels)
GO:0043588	Skin development	18	266	1.11	1.93	1.32e-10	9606.ENSP00000222271,9606.ENSP00000225964,9606.ENSP00000246662,9606.ENSP00000252244,9606.ENSP00000264474,9606.ENSP00000269576,9606.ENSP00000297268,9606.ENSP00000304408,9606.ENSP00000315383,9606.ENSP00000330101,9606.ENSP00000357789,9606.ENSP00000357791,9606.ENSP00000361892,9606.ENSP00000364000,9606.ENSP00000365465,9606.ENSP00000373370,9606.ENSP00000393417,9606.ENSP00000413479	COMP,COL1A1,KRT9,KRT1,CSTA,KRT10,COL1A2,COL3A1,ASPRV1,KRT76,FLG,HRNR,STK4,COL5A2,CDSN,FLG2,CASP14,KRT3
GO:0002376	Immune system process	38	2121	0.53	0.89	3.89e-08	9606.ENSP00000219150,9606.ENSP00000220003,9606.ENSP00000243346,9606.ENSP00000252244,9606.ENSP00000259951,9606.ENSP00000264972,9606.ENSP00000292401,9606.ENSP00000296161,9606.ENSP00000300026,9606.ENSP00000327459,9606.ENSP00000331614,9606.ENSP00000333657,9606.ENSP00000346206,9606.ENSP00000348215,9606.ENSP00000349252,9606.ENSP00000349446,9606.ENSP00000354394,9606.ENSP00000357123,9606.ENSP00000357981,…	CORO1A,CSK,NMI,KRT1,HLA-F,ZAP70,AZGP1,DTX3L,PPIB,APOBEC3B,IKZF1,MX2,TAP1,SH3PXD2A,ITGAL,ARG1,STAT1,MNDA,CTSS,GBP1,IFIT3,STK4,LCN2,ALOX5,TAP2,SYK,CYBB,SERPINB9,ITGB2,LCP1,MX1,PTPN6,IFI35,TAPBP,DOCK2,RNF213,SAMHD1,B2M
GO:0006952	Defense response	30	1394	0.61	0.96	1.19e-07	9606.ENSP00000219150,9606.ENSP00000243346,9606.ENSP00000249066,9606.ENSP00000252244,9606.ENSP00000262428,9606.ENSP00000264972,9606.ENSP00000296161,9606.ENSP00000301659,9606.ENSP00000327459,9606.ENSP00000333657,9606.ENSP00000346206,9606.ENSP00000349252,9606.ENSP00000349446,9606.ENSP00000354394,9606.ENSP00000357123,9606.ENSP00000359504,9606.ENSP00000360876,9606.ENSP00000362108,9606.ENSP00000363512,…	CORO1A,NMI,APOL2,KRT1,COTL1,ZAP70,DTX3L,GSDMA,APOBEC3B,MX2,TAP1,ITGAL,ARG1,STAT1,MNDA,GBP1,IFIT3,LCN2,ALOX5,SYK,CYBB,LSP1,ITGB2,MX1,PTPN6,IFI35,PRB3,RNF213,SAMHD1,B2M
GO:0006955	Immune response	29	1321	0.62	0.97	1.19e-07	9606.ENSP00000219150,9606.ENSP00000220003,9606.ENSP00000243346,9606.ENSP00000252244,9606.ENSP00000264972,9606.ENSP00000296161,9606.ENSP00000327459,9606.ENSP00000333657,9606.ENSP00000346206,9606.ENSP00000349252,9606.ENSP00000349446,9606.ENSP00000354394,9606.ENSP00000357981,9606.ENSP00000359504,9606.ENSP00000360876,9606.ENSP00000362108,9606.ENSP00000363512,9606.ENSP00000364032,9606.ENSP00000364898,…	CORO1A,CSK,NMI,KRT1,ZAP70,DTX3L,APOBEC3B,MX2,TAP1,ITGAL,ARG1,STAT1,CTSS,GBP1,IFIT3,LCN2,ALOX5,TAP2,SYK,CYBB,SERPINB9,LCP1,MX1,PTPN6,IFI35,TAPBP,DOCK2,SAMHD1,B2M
GO:0008544	Epidermis development	16	320	0.98	1.38	1.19e-07	9606.ENSP00000246662,9606.ENSP00000252244,9606.ENSP00000264144,9606.ENSP00000264474,9606.ENSP00000269576,9606.ENSP00000311313,9606.ENSP00000330101,9606.ENSP00000357789,9606.ENSP00000357791,9606.ENSP00000361892,9606.ENSP00000365465,9606.ENSP00000369689,9606.ENSP00000373370,9606.ENSP00000375778,9606.ENSP00000393417,9606.ENSP00000413479	KRT9,KRT1,LAMC2,CSTA,KRT10,CST6,KRT76,FLG,HRNR,STK4,CDSN,CALML5,FLG2,LAMB3,CASP14,KRT3
GO:0002483	Antigen processing and presentation of endogenous peptide antigen	6	18	1.8	1.49	5.26e-06	9606.ENSP00000259951,9606.ENSP00000292401,9606.ENSP00000346206,9606.ENSP00000364032,9606.ENSP00000404833,9606.ENSP00000497910	HLA-F,AZGP1,TAP1,TAP2,TAPBP,B2M
GO:0098542	Defense response to other organism	23	989	0.64	0.87	5.26e-06	9606.ENSP00000219150,9606.ENSP00000243346,9606.ENSP00000252244,9606.ENSP00000262428,9606.ENSP00000264972,9606.ENSP00000296161,9606.ENSP00000301659,9606.ENSP00000327459,9606.ENSP00000333657,9606.ENSP00000349446,9606.ENSP00000354394,9606.ENSP00000359504,9606.ENSP00000360876,9606.ENSP00000362108,9606.ENSP00000364898,9606.ENSP00000367851,9606.ENSP00000381601,9606.ENSP00000391592,9606.ENSP00000395590,…	CORO1A,NMI,KRT1,COTL1,ZAP70,DTX3L,GSDMA,APOBEC3B,MX2,ARG1,STAT1,GBP1,IFIT3,LCN2,SYK,CYBB,MX1,PTPN6,IFI35,PRB3,RNF213,SAMHD1,B2M
GO:0030216	Keratinocyte differentiation	10	138	1.14	1.19	1.12e-05	9606.ENSP00000252244,9606.ENSP00000264474,9606.ENSP00000269576,9606.ENSP00000330101,9606.ENSP00000357789,9606.ENSP00000357791,9606.ENSP00000361892,9606.ENSP00000365465,9606.ENSP00000393417,9606.ENSP00000413479	KRT1,CSTA,KRT10,KRT76,FLG,HRNR,STK4,CDSN,CASP14,KRT3
GO:0045087	Innate immune response	19	754	0.68	0.82	2.88e-05	9606.ENSP00000219150,9606.ENSP00000243346,9606.ENSP00000252244,9606.ENSP00000264972,9606.ENSP00000296161,9606.ENSP00000327459,9606.ENSP00000333657,9606.ENSP00000349446,9606.ENSP00000354394,9606.ENSP00000359504,9606.ENSP00000360876,9606.ENSP00000362108,9606.ENSP00000364898,9606.ENSP00000367851,9606.ENSP00000381601,9606.ENSP00000391592,9606.ENSP00000395590,9606.ENSP00000493536,9606.ENSP00000497910	CORO1A,NMI,KRT1,ZAP70,DTX3L,APOBEC3B,MX2,ARG1,STAT1,GBP1,IFIT3,LCN2,SYK,CYBB,MX1,PTPN6,IFI35,SAMHD1,B2M
GO:0050776	Regulation of immune response	20	844	0.65	0.8	2.88e-05	9606.ENSP00000220003,9606.ENSP00000243346,9606.ENSP00000252244,9606.ENSP00000259951,9606.ENSP00000264972,9606.ENSP00000265132,9606.ENSP00000304408,9606.ENSP00000349446,9606.ENSP00000357123,9606.ENSP00000357981,9606.ENSP00000359504,9606.ENSP00000364032,9606.ENSP00000364898,9606.ENSP00000370074,9606.ENSP00000380948,9606.ENSP00000391592,9606.ENSP00000395590,9606.ENSP00000404833,9606.ENSP00000493536,…	CSK,NMI,KRT1,HLA-F,ZAP70,AMBP,COL3A1,ARG1,MNDA,CTSS,GBP1,TAP2,SYK,SERPINB9,ITGB2,PTPN6,IFI35,TAPBP,SAMHD1,B2M
GO:0051707	Response to other organism	25	1328	0.55	0.73	3.00e-05	9606.ENSP00000219150,9606.ENSP00000243346,9606.ENSP00000252244,9606.ENSP00000262428,9606.ENSP00000264972,9606.ENSP00000296161,9606.ENSP00000301659,9606.ENSP00000327459,9606.ENSP00000333657,9606.ENSP00000349446,9606.ENSP00000354394,9606.ENSP00000359504,9606.ENSP00000360876,9606.ENSP00000362108,9606.ENSP00000364032,9606.ENSP00000364898,9606.ENSP00000367851,9606.ENSP00000381601,9606.ENSP00000391592,…	CORO1A,NMI,KRT1,COTL1,ZAP70,DTX3L,GSDMA,APOBEC3B,MX2,ARG1,STAT1,GBP1,IFIT3,LCN2,TAP2,SYK,CYBB,MX1,PTPN6,IFI35,CFL1,PRB3,RNF213,SAMHD1,B2M
GO:0044419	Biological process involved in interspecies interaction between organisms	26	1490	0.52	0.68	5.32e-05	9606.ENSP00000219150,9606.ENSP00000243346,9606.ENSP00000252244,9606.ENSP00000262428,9606.ENSP00000264972,9606.ENSP00000296161,9606.ENSP00000300026,9606.ENSP00000301659,9606.ENSP00000327459,9606.ENSP00000333657,9606.ENSP00000349446,9606.ENSP00000354394,9606.ENSP00000359504,9606.ENSP00000360876,9606.ENSP00000362108,9606.ENSP00000364032,9606.ENSP00000364898,9606.ENSP00000367851,9606.ENSP00000381601,…	CORO1A,NMI,KRT1,COTL1,ZAP70,DTX3L,PPIB,GSDMA,APOBEC3B,MX2,ARG1,STAT1,GBP1,IFIT3,LCN2,TAP2,SYK,CYBB,MX1,PTPN6,IFI35,CFL1,PRB3,RNF213,SAMHD1,B2M
GO:0048002	Antigen processing and presentation of peptide antigen	7	60	1.34	1.12	5.91e-05	9606.ENSP00000259951,9606.ENSP00000292401,9606.ENSP00000346206,9606.ENSP00000357981,9606.ENSP00000364032,9606.ENSP00000404833,9606.ENSP00000497910	HLA-F,AZGP1,TAP1,CTSS,TAP2,TAPBP,B2M
GO:0097435	Supramolecular fiber organization	16	570	0.73	0.82	6.20e-05	9606.ENSP00000219150,9606.ENSP00000222271,9606.ENSP00000225964,9606.ENSP00000246662,9606.ENSP00000252244,9606.ENSP00000274364,9606.ENSP00000297268,9606.ENSP00000299767,9606.ENSP00000304408,9606.ENSP00000330101,9606.ENSP00000364000,9606.ENSP00000381581,9606.ENSP00000413479,9606.ENSP00000432660,9606.ENSP00000432768,9606.ENSP00000497910	CORO1A,COMP,COL1A1,KRT9,KRT1,IQGAP2,COL1A2,HSP90B1,COL3A1,KRT76,COL5A2,LCP1,KRT3,CFL1,CKAP5,B2M
GO:0002428	Antigen processing and presentation of peptide antigen via MHC class Ib	4	6	2.1	1.13	0.00013	9606.ENSP00000259951,9606.ENSP00000292401,9606.ENSP00000364032,9606.ENSP00000497910	HLA-F,AZGP1,TAP2,B2M
GO:0009605	Response to external stimulus	32	2355	0.41	0.55	0.00025	9606.ENSP00000219150,9606.ENSP00000225964,9606.ENSP00000243346,9606.ENSP00000252244,9606.ENSP00000262428,9606.ENSP00000264144,9606.ENSP00000264972,9606.ENSP00000296161,9606.ENSP00000300026,9606.ENSP00000301659,9606.ENSP00000327459,9606.ENSP00000333657,9606.ENSP00000349446,9606.ENSP00000354394,9606.ENSP00000359504,9606.ENSP00000360876,9606.ENSP00000362108,9606.ENSP00000363512,9606.ENSP00000364032,…	CORO1A,COL1A1,NMI,KRT1,COTL1,LAMC2,ZAP70,DTX3L,PPIB,GSDMA,APOBEC3B,MX2,ARG1,STAT1,GBP1,IFIT3,LCN2,ALOX5,TAP2,SYK,CYBB,LSP1,ITGB2,MX1,PTPN6,IFI35,DOCK2,CFL1,PRB3,RNF213,SAMHD1,B2M
GO:0006950	Response to stress	39	3358	0.34	0.49	0.00042	9606.ENSP00000219150,9606.ENSP00000222271,9606.ENSP00000225964,9606.ENSP00000243346,9606.ENSP00000249066,9606.ENSP00000252244,9606.ENSP00000262428,9606.ENSP00000264972,9606.ENSP00000265132,9606.ENSP00000295770,9606.ENSP00000296161,9606.ENSP00000299767,9606.ENSP00000301659,9606.ENSP00000304408,9606.ENSP00000327459,9606.ENSP00000333657,9606.ENSP00000346206,9606.ENSP00000349252,9606.ENSP00000349446,…	CORO1A,COMP,COL1A1,NMI,APOL2,KRT1,COTL1,ZAP70,AMBP,STT3B,DTX3L,HSP90B1,GSDMA,COL3A1,APOBEC3B,MX2,TAP1,ITGAL,ARG1,STAT1,MNDA,GBP1,IFIT3,LCN2,ALOX5,SYK,CYBB,LSP1,SOD3,ITGB2,MX1,PTPN6,IFI35,PRB3,UBE2J1,RNF213,SAMHD1,B2M,PDIA4
GO:0002474	Antigen processing and presentation of peptide antigen via MHC class I	5	28	1.53	0.91	0.00055	9606.ENSP00000259951,9606.ENSP00000346206,9606.ENSP00000364032,9606.ENSP00000404833,9606.ENSP00000497910	HLA-F,TAP1,TAP2,TAPBP,B2M
GO:0050777	Negative regulation of immune response	9	185	0.96	0.78	0.00058	9606.ENSP00000243346,9606.ENSP00000259951,9606.ENSP00000265132,9606.ENSP00000304408,9606.ENSP00000349446,9606.ENSP00000364898,9606.ENSP00000370074,9606.ENSP00000391592,9606.ENSP00000493536	NMI,HLA-F,AMBP,COL3A1,ARG1,SYK,SERPINB9,PTPN6,SAMHD1
GO:0002252	Immune effector process	12	375	0.78	0.71	0.00059	9606.ENSP00000219150,9606.ENSP00000243346,9606.ENSP00000252244,9606.ENSP00000349252,9606.ENSP00000364032,9606.ENSP00000364898,9606.ENSP00000370074,9606.ENSP00000381581,9606.ENSP00000391592,9606.ENSP00000395590,9606.ENSP00000429283,9606.ENSP00000497910	CORO1A,NMI,KRT1,ITGAL,TAP2,SYK,SERPINB9,LCP1,PTPN6,IFI35,DOCK2,B2M
GO:0019885	Antigen processing and presentation of endogenous peptide antigen via MHC class I	4	12	1.8	0.9	0.00075	9606.ENSP00000346206,9606.ENSP00000364032,9606.ENSP00000404833,9606.ENSP00000497910	TAP1,TAP2,TAPBP,B2M
GO:0002682	Regulation of immune system process	23	1438	0.48	0.54	0.00092	9606.ENSP00000219150,9606.ENSP00000220003,9606.ENSP00000243346,9606.ENSP00000252244,9606.ENSP00000259951,9606.ENSP00000264972,9606.ENSP00000265132,9606.ENSP00000304408,9606.ENSP00000349446,9606.ENSP00000354394,9606.ENSP00000357123,9606.ENSP00000357981,9606.ENSP00000359504,9606.ENSP00000364032,9606.ENSP00000364898,9606.ENSP00000370074,9606.ENSP00000380948,9606.ENSP00000391592,9606.ENSP00000395590,…	CORO1A,CSK,NMI,KRT1,HLA-F,ZAP70,AMBP,COL3A1,ARG1,STAT1,MNDA,CTSS,GBP1,TAP2,SYK,SERPINB9,ITGB2,PTPN6,IFI35,TAPBP,UBE2J1,SAMHD1,B2M
GO:0018149	Peptide cross-linking	5	37	1.41	0.79	0.0014	9606.ENSP00000252244,9606.ENSP00000264474,9606.ENSP00000269576,9606.ENSP00000304408,9606.ENSP00000357789	KRT1,CSTA,KRT10,COL3A1,FLG
GO:0002478	Antigen processing and presentation of exogenous peptide antigen	5	39	1.39	0.77	0.0017	9606.ENSP00000259951,9606.ENSP00000346206,9606.ENSP00000357981,9606.ENSP00000364032,9606.ENSP00000497910	HLA-F,TAP1,CTSS,TAP2,B2M
GO:0002831	Regulation of response to biotic stimulus	11	361	0.76	0.61	0.0021	9606.ENSP00000243346,9606.ENSP00000259951,9606.ENSP00000296161,9606.ENSP00000349446,9606.ENSP00000354394,9606.ENSP00000357123,9606.ENSP00000364898,9606.ENSP00000370074,9606.ENSP00000391592,9606.ENSP00000395590,9606.ENSP00000493536	NMI,HLA-F,DTX3L,ARG1,STAT1,MNDA,SYK,SERPINB9,PTPN6,IFI35,SAMHD1
GO:0043200	Response to amino acid	7	117	1.05	0.69	0.0021	9606.ENSP00000225964,9606.ENSP00000297268,9606.ENSP00000304408,9606.ENSP00000349446,9606.ENSP00000352516,9606.ENSP00000364000,9606.ENSP00000367851	COL1A1,COL1A2,COL3A1,ARG1,DNMT1,COL5A2,CYBB
GO:0002477	Antigen processing and presentation of exogenous peptide antigen via MHC class Ib	3	4	2.15	0.78	0.0022	9606.ENSP00000259951,9606.ENSP00000364032,9606.ENSP00000497910	HLA-F,TAP2,B2M
GO:0071230	Cellular response to amino acid stimulus	6	76	1.17	0.71	0.0022	9606.ENSP00000225964,9606.ENSP00000297268,9606.ENSP00000304408,9606.ENSP00000352516,9606.ENSP00000364000,9606.ENSP00000367851	COL1A1,COL1A2,COL3A1,DNMT1,COL5A2,CYBB
GO:0045088	Regulation of innate immune response	9	238	0.86	0.61	0.0028	9606.ENSP00000243346,9606.ENSP00000259951,9606.ENSP00000349446,9606.ENSP00000357123,9606.ENSP00000364898,9606.ENSP00000370074,9606.ENSP00000391592,9606.ENSP00000395590,9606.ENSP00000493536	NMI,HLA-F,ARG1,MNDA,SYK,SERPINB9,PTPN6,IFI35,SAMHD1
GO:0050896	Response to stimulus	64	7835	0.19	0.36	0.0028	9606.ENSP00000219150,9606.ENSP00000220003,9606.ENSP00000222271,9606.ENSP00000225964,9606.ENSP00000228945,9606.ENSP00000243346,9606.ENSP00000249066,9606.ENSP00000252244,9606.ENSP00000257192,9606.ENSP00000262428,9606.ENSP00000263598,9606.ENSP00000264144,9606.ENSP00000264972,9606.ENSP00000265132,9606.ENSP00000274364,9606.ENSP00000292401,9606.ENSP00000295770,9606.ENSP00000296161,9606.ENSP00000297268,…	CORO1A,CSK,COMP,COL1A1,ARHGDIB,NMI,APOL2,KRT1,DSG1,COTL1,LCN1,LAMC2,ZAP70,AMBP,IQGAP2,AZGP1,STT3B,DTX3L,COL1A2,HSP90B1,PPIB,GSDMA,COL3A1,OLFML3,APOBEC3B,OLFML1,MX2,SERPINA12,TAP1,ITGAL,ARG1,DNMT1,STAT1,MNDA,CTSS,GBP1,IFIT3,STK4,LCN2,ALOX5,COL5A2,TAP2,SYK,CYBB,CALML5,SERPINB9,LSP1,SOD3,ITGB2,LCP1,MX1,PTPN6,IFI35,TAPBP,FBP1,DOCK2,CFL1,ARHGAP45,PRB3,UBE2J1,RNF213,SAMHD1,B2M,PDIA4
GO:0002476	Antigen processing and presentation of endogenous peptide antigen via MHC class Ib	3	5	2.06	0.73	0.0032	9606.ENSP00000259951,9606.ENSP00000292401,9606.ENSP00000364032	HLA-F,AZGP1,TAP2
GO:0050778	Positive regulation of immune response	12	502	0.66	0.49	0.0062	9606.ENSP00000220003,9606.ENSP00000243346,9606.ENSP00000252244,9606.ENSP00000259951,9606.ENSP00000264972,9606.ENSP00000357123,9606.ENSP00000364032,9606.ENSP00000364898,9606.ENSP00000380948,9606.ENSP00000391592,9606.ENSP00000395590,9606.ENSP00000497910	CSK,NMI,KRT1,HLA-F,ZAP70,MNDA,TAP2,SYK,ITGB2,PTPN6,IFI35,B2M
GO:0001775	Cell activation	14	693	0.58	0.46	0.0073	9606.ENSP00000219150,9606.ENSP00000222271,9606.ENSP00000243346,9606.ENSP00000264972,9606.ENSP00000304408,9606.ENSP00000331614,9606.ENSP00000349252,9606.ENSP00000364898,9606.ENSP00000380948,9606.ENSP00000381581,9606.ENSP00000391592,9606.ENSP00000395590,9606.ENSP00000429283,9606.ENSP00000497910	CORO1A,COMP,NMI,ZAP70,COL3A1,IKZF1,ITGAL,SYK,ITGB2,LCP1,PTPN6,IFI35,DOCK2,B2M
GO:0002683	Negative regulation of immune system process	11	433	0.68	0.48	0.0079	9606.ENSP00000243346,9606.ENSP00000259951,9606.ENSP00000265132,9606.ENSP00000304408,9606.ENSP00000349446,9606.ENSP00000357123,9606.ENSP00000359504,9606.ENSP00000364898,9606.ENSP00000370074,9606.ENSP00000391592,9606.ENSP00000493536	NMI,HLA-F,AMBP,COL3A1,ARG1,MNDA,GBP1,SYK,SERPINB9,PTPN6,SAMHD1
GO:0009615	Response to virus	10	356	0.73	0.49	0.0079	9606.ENSP00000243346,9606.ENSP00000296161,9606.ENSP00000327459,9606.ENSP00000333657,9606.ENSP00000354394,9606.ENSP00000359504,9606.ENSP00000360876,9606.ENSP00000381601,9606.ENSP00000432660,9606.ENSP00000493536	NMI,DTX3L,APOBEC3B,MX2,STAT1,GBP1,IFIT3,MX1,CFL1,SAMHD1
GO:0030199	Collagen fibril organization	5	59	1.21	0.58	0.0079	9606.ENSP00000222271,9606.ENSP00000225964,9606.ENSP00000297268,9606.ENSP00000304408,9606.ENSP00000364000	COMP,COL1A1,COL1A2,COL3A1,COL5A2
GO:0031341	Regulation of cell killing	6	102	1.05	0.56	0.0079	9606.ENSP00000259951,9606.ENSP00000349446,9606.ENSP00000364032,9606.ENSP00000364898,9606.ENSP00000370074,9606.ENSP00000497910	HLA-F,ARG1,TAP2,SYK,SERPINB9,B2M
GO:0045229	External encapsulating structure organization	9	281	0.78	0.51	0.0079	9606.ENSP00000222271,9606.ENSP00000225964,9606.ENSP00000297268,9606.ENSP00000304408,9606.ENSP00000357791,9606.ENSP00000357981,9606.ENSP00000364000,9606.ENSP00000375778,9606.ENSP00000381581	COMP,COL1A1,COL1A2,COL3A1,HRNR,CTSS,COL5A2,LAMB3,LCP1
GO:0048519	Negative regulation of biological process	48	5313	0.23	0.34	0.0079	9606.ENSP00000219150,9606.ENSP00000220003,9606.ENSP00000222271,9606.ENSP00000225964,9606.ENSP00000228945,9606.ENSP00000243346,9606.ENSP00000244534,9606.ENSP00000252244,9606.ENSP00000259951,9606.ENSP00000261735,9606.ENSP00000263598,9606.ENSP00000264474,9606.ENSP00000265132,9606.ENSP00000292401,9606.ENSP00000296161,9606.ENSP00000299767,9606.ENSP00000304408,9606.ENSP00000311313,9606.ENSP00000327459,…	CORO1A,CSK,COMP,COL1A1,ARHGDIB,NMI,H1-3,KRT1,HLA-F,ERP29,LCN1,CSTA,AMBP,AZGP1,DTX3L,HSP90B1,COL3A1,CST6,APOBEC3B,H1-5,IKZF1,ACSL4,SERPINA12,WARS1,ARG1,DNMT1,STAT1,MNDA,GBP1,IFIT3,STK4,ALOX5,COL5A2,SYK,CDSN,TXNDC5,SERPINB9,ITGB2,SERPINB7,MX1,PTPN6,IFI35,FBP1,CFL1,UBE2J1,RNF213,SAMHD1,B2M
GO:0061436	Establishment of skin barrier	4	28	1.43	0.6	0.0079	9606.ENSP00000252244,9606.ENSP00000357789,9606.ENSP00000357791,9606.ENSP00000373370	KRT1,FLG,HRNR,FLG2
GO:0009888	Tissue development	23	1723	0.4	0.39	0.0093	9606.ENSP00000222271,9606.ENSP00000225964,9606.ENSP00000246662,9606.ENSP00000252244,9606.ENSP00000264144,9606.ENSP00000264474,9606.ENSP00000269576,9606.ENSP00000297268,9606.ENSP00000304408,9606.ENSP00000311313,9606.ENSP00000330101,9606.ENSP00000331614,9606.ENSP00000354394,9606.ENSP00000357789,9606.ENSP00000357791,9606.ENSP00000361892,9606.ENSP00000365465,9606.ENSP00000369689,9606.ENSP00000373370,…	COMP,COL1A1,KRT9,KRT1,LAMC2,CSTA,KRT10,COL1A2,COL3A1,CST6,KRT76,IKZF1,STAT1,FLG,HRNR,STK4,CDSN,CALML5,FLG2,LAMB3,ITGB2,CASP14,KRT3
GO:0031343	Positive regulation of cell killing	5	64	1.17	0.55	0.0096	9606.ENSP00000259951,9606.ENSP00000349446,9606.ENSP00000364032,9606.ENSP00000364898,9606.ENSP00000497910	HLA-F,ARG1,TAP2,SYK,B2M
GO:0048871	Multicellular organismal homeostasis	10	372	0.71	0.47	0.0100	9606.ENSP00000219150,9606.ENSP00000222271,9606.ENSP00000252244,9606.ENSP00000263598,9606.ENSP00000292401,9606.ENSP00000304408,9606.ENSP00000357789,9606.ENSP00000357791,9606.ENSP00000373370,9606.ENSP00000497910	CORO1A,COMP,KRT1,LCN1,AZGP1,COL3A1,FLG,HRNR,FLG2,B2M
GO:0031347	Regulation of defense response	13	638	0.59	0.44	0.0108	9606.ENSP00000243346,9606.ENSP00000252244,9606.ENSP00000259951,9606.ENSP00000296161,9606.ENSP00000349446,9606.ENSP00000354394,9606.ENSP00000357123,9606.ENSP00000363512,9606.ENSP00000364898,9606.ENSP00000370074,9606.ENSP00000391592,9606.ENSP00000395590,9606.ENSP00000493536	NMI,KRT1,HLA-F,DTX3L,ARG1,STAT1,MNDA,ALOX5,SYK,SERPINB9,PTPN6,IFI35,SAMHD1
GO:0001817	Regulation of cytokine production	14	739	0.55	0.42	0.0112	9606.ENSP00000220003,9606.ENSP00000243346,9606.ENSP00000259951,9606.ENSP00000349446,9606.ENSP00000354394,9606.ENSP00000357123,9606.ENSP00000359504,9606.ENSP00000363512,9606.ENSP00000364898,9606.ENSP00000367851,9606.ENSP00000381101,9606.ENSP00000391592,9606.ENSP00000451261,9606.ENSP00000497910	CSK,NMI,HLA-F,ARG1,STAT1,MNDA,GBP1,ALOX5,SYK,CYBB,SERPINB7,PTPN6,UBE2J1,B2M
GO:0031348	Negative regulation of defense response	8	232	0.82	0.48	0.0112	9606.ENSP00000243346,9606.ENSP00000252244,9606.ENSP00000259951,9606.ENSP00000349446,9606.ENSP00000363512,9606.ENSP00000364898,9606.ENSP00000370074,9606.ENSP00000493536	NMI,KRT1,HLA-F,ARG1,ALOX5,SYK,SERPINB9,SAMHD1
GO:0010033	Response to organic substance	30	2692	0.32	0.35	0.0120	9606.ENSP00000219150,9606.ENSP00000220003,9606.ENSP00000222271,9606.ENSP00000225964,9606.ENSP00000243346,9606.ENSP00000257192,9606.ENSP00000295770,9606.ENSP00000297268,9606.ENSP00000299767,9606.ENSP00000304408,9606.ENSP00000333657,9606.ENSP00000349446,9606.ENSP00000352516,9606.ENSP00000354394,9606.ENSP00000357123,9606.ENSP00000357981,9606.ENSP00000359504,9606.ENSP00000360876,9606.ENSP00000364000,…	CORO1A,CSK,COMP,COL1A1,NMI,DSG1,STT3B,COL1A2,HSP90B1,COL3A1,MX2,ARG1,DNMT1,STAT1,MNDA,CTSS,GBP1,IFIT3,COL5A2,TAP2,SYK,CYBB,SERPINB9,LSP1,ITGB2,MX1,PTPN6,FBP1,UBE2J1,B2M
GO:0002703	Regulation of leukocyte mediated immunity	8	239	0.8	0.47	0.0130	9606.ENSP00000259951,9606.ENSP00000349446,9606.ENSP00000364032,9606.ENSP00000364898,9606.ENSP00000370074,9606.ENSP00000380948,9606.ENSP00000391592,9606.ENSP00000497910	HLA-F,ARG1,TAP2,SYK,SERPINB9,ITGB2,PTPN6,B2M
GO:0043589	Skin morphogenesis	3	11	1.71	0.55	0.0131	9606.ENSP00000225964,9606.ENSP00000297268,9606.ENSP00000365465	COL1A1,COL1A2,CDSN
GO:0007155	Cell adhesion	16	965	0.5	0.4	0.0133	9606.ENSP00000219150,9606.ENSP00000222271,9606.ENSP00000257192,9606.ENSP00000264144,9606.ENSP00000264474,9606.ENSP00000264972,9606.ENSP00000265132,9606.ENSP00000292401,9606.ENSP00000304408,9606.ENSP00000349252,9606.ENSP00000364898,9606.ENSP00000365465,9606.ENSP00000373370,9606.ENSP00000375778,9606.ENSP00000380948,9606.ENSP00000391592	CORO1A,COMP,DSG1,LAMC2,CSTA,ZAP70,AMBP,AZGP1,COL3A1,ITGAL,SYK,CDSN,FLG2,LAMB3,ITGB2,PTPN6
GO:0045321	Leukocyte activation	12	574	0.6	0.41	0.0150	9606.ENSP00000219150,9606.ENSP00000243346,9606.ENSP00000264972,9606.ENSP00000331614,9606.ENSP00000349252,9606.ENSP00000364898,9606.ENSP00000380948,9606.ENSP00000381581,9606.ENSP00000391592,9606.ENSP00000395590,9606.ENSP00000429283,9606.ENSP00000497910	CORO1A,NMI,ZAP70,IKZF1,ITGAL,SYK,ITGB2,LCP1,PTPN6,IFI35,DOCK2,B2M
GO:0045824	Negative regulation of innate immune response	5	74	1.11	0.49	0.0152	9606.ENSP00000243346,9606.ENSP00000259951,9606.ENSP00000349446,9606.ENSP00000370074,9606.ENSP00000493536	NMI,HLA-F,ARG1,SERPINB9,SAMHD1
GO:0070887	Cellular response to chemical stimulus	29	2609	0.32	0.34	0.0160	9606.ENSP00000219150,9606.ENSP00000220003,9606.ENSP00000222271,9606.ENSP00000225964,9606.ENSP00000243346,9606.ENSP00000265132,9606.ENSP00000297268,9606.ENSP00000299767,9606.ENSP00000300026,9606.ENSP00000304408,9606.ENSP00000349446,9606.ENSP00000352516,9606.ENSP00000354394,9606.ENSP00000357123,9606.ENSP00000357981,9606.ENSP00000359504,9606.ENSP00000360876,9606.ENSP00000363512,9606.ENSP00000364000,…	CORO1A,CSK,COMP,COL1A1,NMI,AMBP,COL1A2,HSP90B1,PPIB,COL3A1,ARG1,DNMT1,STAT1,MNDA,CTSS,GBP1,IFIT3,ALOX5,COL5A2,SYK,CYBB,SERPINB9,LSP1,SOD3,ITGB2,MX1,PTPN6,FBP1,B2M
GO:0051607	Defense response to virus	8	252	0.78	0.44	0.0169	9606.ENSP00000296161,9606.ENSP00000327459,9606.ENSP00000333657,9606.ENSP00000354394,9606.ENSP00000359504,9606.ENSP00000360876,9606.ENSP00000381601,9606.ENSP00000493536	DTX3L,APOBEC3B,MX2,STAT1,GBP1,IFIT3,MX1,SAMHD1
GO:0006465	Signal peptide processing	3	13	1.64	0.51	0.0178	9606.ENSP00000263672,9606.ENSP00000427463,9606.ENSP00000468633	SPCS2,SPCS3,SEC11C
GO:0002366	Leukocyte activation involved in immune response	7	190	0.84	0.44	0.0191	9606.ENSP00000219150,9606.ENSP00000243346,9606.ENSP00000349252,9606.ENSP00000364898,9606.ENSP00000381581,9606.ENSP00000395590,9606.ENSP00000429283	CORO1A,NMI,ITGAL,SYK,LCP1,IFI35,DOCK2
GO:0006801	Superoxide metabolic process	4	41	1.27	0.47	0.0209	9606.ENSP00000348215,9606.ENSP00000367851,9606.ENSP00000371554,9606.ENSP00000380334	SH3PXD2A,CYBB,SOD3,NCF4
GO:0034097	Response to cytokine	14	804	0.52	0.37	0.0213	9606.ENSP00000219150,9606.ENSP00000225964,9606.ENSP00000243346,9606.ENSP00000304408,9606.ENSP00000333657,9606.ENSP00000349446,9606.ENSP00000354394,9606.ENSP00000357123,9606.ENSP00000359504,9606.ENSP00000360876,9606.ENSP00000364898,9606.ENSP00000371194,9606.ENSP00000381601,9606.ENSP00000391592	CORO1A,COL1A1,NMI,COL3A1,MX2,ARG1,STAT1,MNDA,GBP1,IFIT3,SYK,LSP1,MX1,PTPN6
GO:0048513	Animal organ development	33	3246	0.28	0.31	0.0218	9606.ENSP00000220003,9606.ENSP00000222271,9606.ENSP00000225964,9606.ENSP00000246662,9606.ENSP00000252244,9606.ENSP00000264144,9606.ENSP00000264474,9606.ENSP00000264972,9606.ENSP00000269576,9606.ENSP00000297268,9606.ENSP00000300026,9606.ENSP00000304408,9606.ENSP00000315383,9606.ENSP00000330074,9606.ENSP00000330101,9606.ENSP00000331614,9606.ENSP00000348215,9606.ENSP00000349446,9606.ENSP00000354394,…	CSK,COMP,COL1A1,KRT9,KRT1,LAMC2,CSTA,ZAP70,KRT10,COL1A2,PPIB,COL3A1,ASPRV1,H1-5,KRT76,IKZF1,SH3PXD2A,ARG1,STAT1,FLG,HRNR,STK4,COL5A2,SYK,CDSN,FLG2,LAMB3,LCP1,PTPN6,CASP14,KRT3,DOCK2,B2M
GO:0031424	Keratinization	5	83	1.06	0.45	0.0219	9606.ENSP00000252244,9606.ENSP00000330101,9606.ENSP00000357791,9606.ENSP00000393417,9606.ENSP00000413479	KRT1,KRT76,HRNR,CASP14,KRT3
GO:0008285	Negative regulation of cell population proliferation	13	713	0.54	0.37	0.0237	9606.ENSP00000220003,9606.ENSP00000243346,9606.ENSP00000292401,9606.ENSP00000347495,9606.ENSP00000349446,9606.ENSP00000354394,9606.ENSP00000357123,9606.ENSP00000360876,9606.ENSP00000361892,9606.ENSP00000363512,9606.ENSP00000391592,9606.ENSP00000395590,9606.ENSP00000497910	CSK,NMI,AZGP1,WARS1,ARG1,STAT1,MNDA,IFIT3,STK4,ALOX5,PTPN6,IFI35,B2M
GO:0001910	Regulation of leukocyte mediated cytotoxicity	5	86	1.04	0.43	0.0250	9606.ENSP00000259951,9606.ENSP00000349446,9606.ENSP00000364032,9606.ENSP00000370074,9606.ENSP00000497910	HLA-F,ARG1,TAP2,SERPINB9,B2M
GO:0071310	Cellular response to organic substance	24	2019	0.35	0.32	0.0251	9606.ENSP00000219150,9606.ENSP00000220003,9606.ENSP00000222271,9606.ENSP00000225964,9606.ENSP00000243346,9606.ENSP00000297268,9606.ENSP00000299767,9606.ENSP00000304408,9606.ENSP00000349446,9606.ENSP00000352516,9606.ENSP00000354394,9606.ENSP00000357123,9606.ENSP00000357981,9606.ENSP00000359504,9606.ENSP00000360876,9606.ENSP00000364000,9606.ENSP00000364898,9606.ENSP00000367851,9606.ENSP00000370074,…	CORO1A,CSK,COMP,COL1A1,NMI,COL1A2,HSP90B1,COL3A1,ARG1,DNMT1,STAT1,MNDA,CTSS,GBP1,IFIT3,COL5A2,SYK,CYBB,SERPINB9,LSP1,MX1,PTPN6,FBP1,B2M
GO:1903039	Positive regulation of leukocyte cell-cell adhesion	8	274	0.74	0.4	0.0251	9606.ENSP00000219150,9606.ENSP00000220003,9606.ENSP00000264972,9606.ENSP00000363512,9606.ENSP00000364898,9606.ENSP00000380948,9606.ENSP00000391592,9606.ENSP00000497910	CORO1A,CSK,ZAP70,ALOX5,SYK,ITGB2,PTPN6,B2M
GO:0030198	Extracellular matrix organization	8	278	0.74	0.39	0.0272	9606.ENSP00000222271,9606.ENSP00000225964,9606.ENSP00000297268,9606.ENSP00000304408,9606.ENSP00000357981,9606.ENSP00000364000,9606.ENSP00000375778,9606.ENSP00000381581	COMP,COL1A1,COL1A2,COL3A1,CTSS,COL5A2,LAMB3,LCP1
GO:0051262	Protein tetramerization	5	91	1.02	0.41	0.0301	9606.ENSP00000252244,9606.ENSP00000269576,9606.ENSP00000361892,9606.ENSP00000493536,9606.ENSP00000497910	KRT1,KRT10,STK4,SAMHD1,B2M
GO:0002481	Antigen processing and presentation of exogenous protein antigen via MHC class Ib, TAP-dependent	2	2	2.28	0.44	0.0319	9606.ENSP00000364032,9606.ENSP00000497910	TAP2,B2M
GO:1903037	Regulation of leukocyte cell-cell adhesion	9	368	0.67	0.36	0.0323	9606.ENSP00000219150,9606.ENSP00000220003,9606.ENSP00000264972,9606.ENSP00000349446,9606.ENSP00000363512,9606.ENSP00000364898,9606.ENSP00000380948,9606.ENSP00000391592,9606.ENSP00000497910	CORO1A,CSK,ZAP70,ARG1,ALOX5,SYK,ITGB2,PTPN6,B2M
GO:0010243	Response to organonitrogen compound	15	963	0.47	0.33	0.0334	9606.ENSP00000220003,9606.ENSP00000225964,9606.ENSP00000295770,9606.ENSP00000297268,9606.ENSP00000299767,9606.ENSP00000304408,9606.ENSP00000349446,9606.ENSP00000352516,9606.ENSP00000354394,9606.ENSP00000364000,9606.ENSP00000364898,9606.ENSP00000367851,9606.ENSP00000380948,9606.ENSP00000408025,9606.ENSP00000451261	CSK,COL1A1,STT3B,COL1A2,HSP90B1,COL3A1,ARG1,DNMT1,STAT1,COL5A2,SYK,CYBB,ITGB2,FBP1,UBE2J1
GO:0046649	Lymphocyte activation	10	457	0.62	0.35	0.0334	9606.ENSP00000219150,9606.ENSP00000264972,9606.ENSP00000331614,9606.ENSP00000349252,9606.ENSP00000364898,9606.ENSP00000380948,9606.ENSP00000381581,9606.ENSP00000391592,9606.ENSP00000429283,9606.ENSP00000497910	CORO1A,ZAP70,IKZF1,ITGAL,SYK,ITGB2,LCP1,PTPN6,DOCK2,B2M
GO:0002281	Macrophage activation involved in immune response	3	19	1.48	0.41	0.0376	9606.ENSP00000243346,9606.ENSP00000364898,9606.ENSP00000395590	NMI,SYK,IFI35
GO:0042110	T cell activation	8	298	0.71	0.35	0.0390	9606.ENSP00000219150,9606.ENSP00000264972,9606.ENSP00000349252,9606.ENSP00000364898,9606.ENSP00000381581,9606.ENSP00000391592,9606.ENSP00000429283,9606.ENSP00000497910	CORO1A,ZAP70,ITGAL,SYK,LCP1,PTPN6,DOCK2,B2M
GO:0002684	Positive regulation of immune system process	14	874	0.48	0.32	0.0407	9606.ENSP00000219150,9606.ENSP00000220003,9606.ENSP00000243346,9606.ENSP00000252244,9606.ENSP00000259951,9606.ENSP00000264972,9606.ENSP00000349446,9606.ENSP00000357123,9606.ENSP00000364032,9606.ENSP00000364898,9606.ENSP00000380948,9606.ENSP00000391592,9606.ENSP00000395590,9606.ENSP00000497910	CORO1A,CSK,NMI,KRT1,HLA-F,ZAP70,ARG1,MNDA,TAP2,SYK,ITGB2,PTPN6,IFI35,B2M
GO:0002697	Regulation of immune effector process	9	383	0.65	0.34	0.0407	9606.ENSP00000259951,9606.ENSP00000349446,9606.ENSP00000364032,9606.ENSP00000364898,9606.ENSP00000370074,9606.ENSP00000380948,9606.ENSP00000391592,9606.ENSP00000451261,9606.ENSP00000497910	HLA-F,ARG1,TAP2,SYK,SERPINB9,ITGB2,PTPN6,UBE2J1,B2M
GO:0042221	Response to chemical	37	4010	0.24	0.27	0.0427	9606.ENSP00000219150,9606.ENSP00000220003,9606.ENSP00000222271,9606.ENSP00000225964,9606.ENSP00000243346,9606.ENSP00000257192,9606.ENSP00000264144,9606.ENSP00000265132,9606.ENSP00000292401,9606.ENSP00000295770,9606.ENSP00000297268,9606.ENSP00000299767,9606.ENSP00000300026,9606.ENSP00000304408,9606.ENSP00000333657,9606.ENSP00000349446,9606.ENSP00000352516,9606.ENSP00000354394,9606.ENSP00000357123,…	CORO1A,CSK,COMP,COL1A1,NMI,DSG1,LAMC2,AMBP,AZGP1,STT3B,COL1A2,HSP90B1,PPIB,COL3A1,MX2,ARG1,DNMT1,STAT1,MNDA,CTSS,GBP1,IFIT3,ALOX5,COL5A2,TAP2,SYK,CYBB,SERPINB9,LSP1,SOD3,ITGB2,MX1,PTPN6,FBP1,DOCK2,UBE2J1,B2M
GO:0071417	Cellular response to organonitrogen compound	11	574	0.56	0.32	0.0446	9606.ENSP00000220003,9606.ENSP00000225964,9606.ENSP00000297268,9606.ENSP00000299767,9606.ENSP00000304408,9606.ENSP00000349446,9606.ENSP00000352516,9606.ENSP00000354394,9606.ENSP00000364000,9606.ENSP00000367851,9606.ENSP00000408025	CSK,COL1A1,COL1A2,HSP90B1,COL3A1,ARG1,DNMT1,STAT1,COL5A2,CYBB,FBP1
GO:0022407	Regulation of cell-cell adhesion	10	480	0.6	0.33	0.0447	9606.ENSP00000219150,9606.ENSP00000220003,9606.ENSP00000264972,9606.ENSP00000349446,9606.ENSP00000363512,9606.ENSP00000364898,9606.ENSP00000365465,9606.ENSP00000380948,9606.ENSP00000391592,9606.ENSP00000497910	CORO1A,CSK,ZAP70,ARG1,ALOX5,SYK,CDSN,ITGB2,PTPN6,B2M
GO:0043366	Beta selection	2	3	2.1	0.39	0.0466	9606.ENSP00000264972,9606.ENSP00000364898	ZAP70,SYK
GO:0030155	Regulation of cell adhesion	13	784	0.5	0.31	0.0468	9606.ENSP00000219150,9606.ENSP00000220003,9606.ENSP00000225964,9606.ENSP00000264972,9606.ENSP00000349446,9606.ENSP00000359504,9606.ENSP00000361892,9606.ENSP00000363512,9606.ENSP00000364898,9606.ENSP00000365465,9606.ENSP00000380948,9606.ENSP00000391592,9606.ENSP00000497910	CORO1A,CSK,COL1A1,ZAP70,ARG1,GBP1,STK4,ALOX5,SYK,CDSN,ITGB2,PTPN6,B2M
GO:0001909	Leukocyte mediated cytotoxicity	4	56	1.13	0.37	0.0471	9606.ENSP00000219150,9606.ENSP00000364032,9606.ENSP00000391592,9606.ENSP00000497910	CORO1A,TAP2,PTPN6,B2M
GO:0002707	Negative regulation of lymphocyte mediated immunity	4	56	1.13	0.37	0.0471	9606.ENSP00000259951,9606.ENSP00000349446,9606.ENSP00000370074,9606.ENSP00000391592	HLA-F,ARG1,SERPINB9,PTPN6
GO:0007159	Leukocyte cell-cell adhesion	4	56	1.13	0.37	0.0471	9606.ENSP00000264972,9606.ENSP00000349252,9606.ENSP00000364898,9606.ENSP00000380948	ZAP70,ITGAL,SYK,ITGB2
GO:0009719	Response to endogenous stimulus	18	1363	0.4	0.29	0.0471	9606.ENSP00000219150,9606.ENSP00000220003,9606.ENSP00000222271,9606.ENSP00000225964,9606.ENSP00000257192,9606.ENSP00000297268,9606.ENSP00000299767,9606.ENSP00000304408,9606.ENSP00000349446,9606.ENSP00000352516,9606.ENSP00000354394,9606.ENSP00000357981,9606.ENSP00000364000,9606.ENSP00000364898,9606.ENSP00000367851,9606.ENSP00000370074,9606.ENSP00000380948,9606.ENSP00000408025	CORO1A,CSK,COMP,COL1A1,DSG1,COL1A2,HSP90B1,COL3A1,ARG1,DNMT1,STAT1,CTSS,COL5A2,SYK,CYBB,SERPINB9,ITGB2,FBP1
GO:0001912	Positive regulation of leukocyte mediated cytotoxicity	4	57	1.12	0.37	0.0481	9606.ENSP00000259951,9606.ENSP00000349446,9606.ENSP00000364032,9606.ENSP00000497910	HLA-F,ARG1,TAP2,B2M
GO:0042554	Superoxide anion generation	3	22	1.41	0.38	0.0481	9606.ENSP00000348215,9606.ENSP00000367851,9606.ENSP00000380334	SH3PXD2A,CYBB,NCF4
GO:0001894	Tissue homeostasis	7	238	0.75	0.34	0.0495	9606.ENSP00000219150,9606.ENSP00000222271,9606.ENSP00000252244,9606.ENSP00000263598,9606.ENSP00000292401,9606.ENSP00000304408,9606.ENSP00000497910	CORO1A,COMP,KRT1,LCN1,AZGP1,COL3A1,B2M
